# Supplementary material for: Spectrophotometric- and LC/MS-Based Lipidomics Analyses Revealed Changes in Lipid Profiles of Pike Eel (Muraenesox cinereus) Treated with Stable Chlorine Dioxides and Vacuum-Packed during Chilled Storage
Source: MDPI journal article supplement (doi:10.3390/foods12142791), 2023-07-22
Supplement: s1 [file s1]

## Supplementary Material

# Spectrophotometric- and LC/MS-Based Lipidomics Analyses Revealed Changes in Lipid Profiles of Pike Eel (*Muraenesox cinereus*) Treated with Stable Chlorine Dioxides and Vacuum-Packed during Chilled Storage

Shanshan Shui <sup>1,2,3</sup>, Yingru Wu <sup>2</sup>, Xiaonan Chen <sup>2</sup>, Ruixue Li <sup>4</sup>, Huicheng Yang <sup>3,\*</sup>, Baiyi Lu <sup>1</sup> and Bin Zhang <sup>2,\*</sup>

<sup>1</sup> Department of Food Science and Nutrition, College of Biosystems Engineering and Food Science, Zhejiang University, Hangzhou 310058, China

<sup>2</sup> Key Laboratory of Health Risk Factors for Seafood of Zhejiang Province, College of Food Science and Pharmacy, Zhejiang Ocean University, Zhoushan 316022, China

<sup>3</sup> Zhejiang Marine Development Research Institute, Zhoushan 316022, China

<sup>4</sup> Comprehensive Technical Service Center of Zhoushan Customs, Zhoushan 316000, China

\* Correspondence: huichengy@163.com (H.Y.); zhangbin@zjou.edu.cn or zhangbin\_ouc@163.com (B.Z.); Tel.: +86-0580-255-4781 (B.Z.)

## 1 Supplementary Tables

### 1.1 Table S1. Lipid classification and composition in fresh (FE), simple-packaged (SP), and vacuum-packaged (VP) pike eels via LC-MS/MS analysis.

| ID     | Lipids              | Mode | M/Z      | Formula              |
|--------|---------------------|------|----------|----------------------|
| pos_1  | AEA(15:1)           | pos  | 301.2850 | C17 H37 O2 N2        |
| pos_2  | AcCa(13:0)          | pos  | 358.2952 | C20 H40 O4 N1        |
| pos_4  | BisMePA(10:1e/18:1) | pos  | 625.4204 | C33 H63 O7 N0 P1 Na1 |
| pos_6  | BisMePA(16:2e/17:1) | pos  | 688.5276 | C38 H75 O7 N1 P1     |
| pos_7  | BisMePA(16:2e/18:1) | pos  | 702.5432 | C39 H77 O7 N1 P1     |
| pos_8  | BisMePA(12:0e/22:6) | pos  | 701.4517 | C39 H67 O7 N0 P1 Na1 |
| pos_9  | BisMePA(18:2e/17:1) | pos  | 716.5589 | C40 H79 O7 N1 P1     |
| pos_10 | BisMePA(18:3e/17:1) | pos  | 714.5432 | C40 H77 O7 N1 P1     |
| pos_11 | BisMePA(18:2e/18:1) | pos  | 730.5745 | C41 H81 O7 N1 P1     |

# Supplementary Material

|        |                         |     |           |                   |
|--------|-------------------------|-----|-----------|-------------------|
| pos_12 | BisMePA(18:3e/18:1)     | pos | 728.5589  | C41 H79 O7 N1 P1  |
| pos_13 | BisMePA(16:0/20:5)      | pos | 740.5225  | C41 H75 O8 N1 P1  |
| pos_14 | BisMePA(16:2e/20:4)     | pos | 724.5276  | C41 H75 O7 N1 P1  |
| pos_15 | BisMePA(18:2e/20:0)     | pos | 760.6215  | C43 H87 O7 N1 P1  |
| pos_16 | BisMePA(18:0/20:5)      | pos | 768.5538  | C43 H79 O8 N1 P1  |
| pos_18 | BisMePA(16:2e/22:4)     | pos | 752.5589  | C43 H79 O7 N1 P1  |
| pos_19 | BisMePA(18:2e/20:4)     | pos | 752.5589  | C43 H79 O7 N1 P1  |
| pos_20 | BisMePA(18:3e/20:4)     | pos | 750.5432  | C43 H77 O7 N1 P1  |
| pos_21 | BisMePA(20:5/20:5)      | pos | 786.5068  | C45 H73 O8 N1 P1  |
| pos_22 | BisMePA(18:2e/22:4)     | pos | 780.5902  | C45 H83 O7 N1 P1  |
| pos_23 | BisMePA(20:2e/20:4)     | pos | 780.5902  | C45 H83 O7 N1 P1  |
| pos_24 | BisMePA(18:3e/22:4)     | pos | 778.5745  | C45 H81 O7 N1 P1  |
| pos_25 | BisMePA(18:3e/22:5)     | pos | 776.5589  | C45 H79 O7 N1 P1  |
| pos_26 | BisMePA(22:5/22:6)      | pos | 840.5538  | C49 H79 O8 N1 P1  |
| pos_27 | BisMePA(22:6/22:6)      | pos | 838.5381  | C49 H77 O8 N1 P1  |
| pos_28 | BisMePA(30:0/15:0)      | pos | 876.7416  | C50 H103 O8 N1 P1 |
| pos_29 | CL(20:5/20:4/22:4/24:1) | pos | 1634.1047 | C95 H159 O17 P2   |
| pos_30 | Cer(d16:0/12:0)         | pos | 456.4411  | C28 H58 O3 N1     |
| pos_31 | Cer(d12:0/16:0)         | pos | 456.4411  | C28 H58 O3 N1     |
| pos_33 | Cer(d12:0/18:0)         | pos | 484.4724  | C30 H62 O3 N1     |
| pos_34 | Cer(d16:1/14:0)         | pos | 464.4462  | C30 H58 O2 N1     |
| pos_35 | Cer(d16:0/16:0)         | pos | 512.5037  | C32 H66 O3 N1     |
| pos_36 | Cer(d16:1/16:0)         | pos | 492.4775  | C32 H62 O2 N1     |

---

|        |                   |     |          |               |
|--------|-------------------|-----|----------|---------------|
| pos_37 | Cer(d17:1/16:0)   | pos | 506.4932 | C33 H64 O2 N1 |
| pos_38 | Cer(d16:0/18:0)   | pos | 540.5350 | C34 H70 O3 N1 |
| pos_39 | Cer(d16:0/18:0+O) | pos | 556.5299 | C34 H70 O4 N1 |
| pos_40 | Cer(d16:0/18:1)   | pos | 538.5194 | C34 H68 O3 N1 |
| pos_41 | Cer(d18:1/16:0)   | pos | 538.5194 | C34 H68 O3 N1 |
| pos_42 | Cer(d16:0/18:2)   | pos | 536.5037 | C34 H66 O3 N1 |
| pos_43 | Cer(d18:0/18:0)   | pos | 568.5663 | C36 H74 O3 N1 |
| pos_45 | Cer(d16:0/20:1)   | pos | 566.5507 | C36 H72 O3 N1 |
| pos_46 | Cer(d16:1/20:0)   | pos | 566.5507 | C36 H72 O3 N1 |
| pos_47 | Cer(d20:0/18:0)   | pos | 596.5976 | C38 H78 O3 N1 |
| pos_48 | Cer(d16:1/22:0)   | pos | 594.5820 | C38 H76 O3 N1 |
| pos_49 | Cer(d16:1/22:1)   | pos | 592.5663 | C38 H74 O3 N1 |
| pos_50 | Cer(d16:0/22:6)   | pos | 584.5037 | C38 H66 O3 N1 |
| pos_51 | Cer(d16:1/23:0)   | pos | 608.5976 | C39 H78 O3 N1 |
| pos_52 | Cer(d16:1/23:1)   | pos | 588.5714 | C39 H74 O2 N1 |
| pos_53 | Cer(d22:0/18:0)   | pos | 624.6289 | C40 H82 O3 N1 |
| pos_54 | Cer(d16:0/24:1)   | pos | 622.6133 | C40 H80 O3 N1 |
| pos_55 | Cer(d18:1/22:0)   | pos | 622.6133 | C40 H80 O3 N1 |
| pos_56 | Cer(d16:1/24:1)   | pos | 602.5871 | C40 H76 O2 N1 |
| pos_57 | Cer(d16:1/24:2)   | pos | 618.5820 | C40 H76 O3 N1 |
| pos_58 | Cer(d17:1/23:3)   | pos | 616.5663 | C40 H74 O3 N1 |
| pos_59 | Cer(d19:1/22:0)   | pos | 636.6289 | C41 H82 O3 N1 |
| pos_60 | Cer(d18:1/23:0)   | pos | 618.6184 | C41 H80 O2 N1 |

---

# Supplementary Material

|        |                   |     |          |               |
|--------|-------------------|-----|----------|---------------|
| pos_62 | Cer(d19:1/23:0)   | pos | 632.6340 | C42 H82 O2 N1 |
| pos_63 | Cer(d18:1/24:0)   | pos | 650.6446 | C42 H84 O3 N1 |
| pos_64 | Cer(d16:1/26:1)   | pos | 630.6184 | C42 H80 O2 N1 |
| pos_65 | Cer(d18:1/24:1)   | pos | 648.6289 | C42 H82 O3 N1 |
| pos_66 | Cer(d18:2/24:1)   | pos | 628.6027 | C42 H78 O2 N1 |
| pos_67 | Cer(d19:1/23:3)   | pos | 644.5976 | C42 H78 O3 N1 |
| pos_68 | Cer(d17:1/26:1)   | pos | 662.6446 | C43 H84 O3 N1 |
| pos_69 | Cer(d19:2/24:1)   | pos | 660.6289 | C43 H82 O3 N1 |
| pos_70 | Cer(d18:1/26:1)   | pos | 658.6497 | C44 H84 O2 N1 |
| pos_71 | Cer(m18:0/16:0)   | pos | 524.5401 | C34 H70 O2 N1 |
| pos_72 | Cer(m18:0/20:0)   | pos | 580.6027 | C38 H78 O2 N1 |
| pos_73 | Cer(m18:0/22:0)   | pos | 608.6340 | C40 H82 O2 N1 |
| pos_74 | Cer(m17:0/24:1)   | pos | 620.6340 | C41 H82 O2 N1 |
| pos_75 | Cer(m18:0/24:0)   | pos | 636.6653 | C42 H86 O2 N1 |
| pos_76 | Cer(m18:0/24:1)   | pos | 634.6497 | C42 H84 O2 N1 |
| pos_77 | Cer(t16:0/14:0)   | pos | 464.4462 | C30 H58 O2 N1 |
| pos_78 | Cer(t16:0/16:0)   | pos | 528.4986 | C32 H66 O4 N1 |
| pos_79 | Cer(t17:0/16:0)   | pos | 506.4932 | C33 H64 O2 N1 |
| pos_80 | Cer(t18:0/16:0)   | pos | 556.5299 | C34 H70 O4 N1 |
| pos_81 | Cer(t20:0/16:0)   | pos | 584.5612 | C36 H74 O4 N1 |
| pos_82 | Cer(t16:0/20:0)   | pos | 548.5401 | C36 H70 O2 N1 |
| pos_83 | Cer(t18:0/18:0+O) | pos | 600.5562 | C36 H74 O5 N1 |
| pos_84 | Cer(t18:0/18:1)   | pos | 582.5456 | C36 H72 O4 N1 |

---

|         |                 |     |          |               |
|---------|-----------------|-----|----------|---------------|
| pos_85  | Cer(t16:0/21:0) | pos | 562.5558 | C37 H72 O2 N1 |
| pos_86  | Cer(t16:0/22:0) | pos | 594.5820 | C38 H76 O3 N1 |
| pos_87  | Cer(t16:0/22:1) | pos | 574.5558 | C38 H72 O2 N1 |
| pos_88  | Cer(t16:0/22:3) | pos | 588.5350 | C38 H70 O3 N1 |
| pos_89  | Cer(t16:0/23:0) | pos | 608.5976 | C39 H78 O3 N1 |
| pos_90  | Cer(t16:0/23:5) | pos | 598.5194 | C39 H68 O3 N1 |
| pos_91  | Cer(t16:0/24:0) | pos | 622.6133 | C40 H80 O3 N1 |
| pos_92  | Cer(t16:0/24:1) | pos | 620.5976 | C40 H78 O3 N1 |
| pos_93  | Cer(t17:0/23:3) | pos | 616.5663 | C40 H74 O3 N1 |
| pos_94  | Cer(t17:0/24:0) | pos | 618.6184 | C41 H80 O2 N1 |
| pos_95  | Cer(t18:0/23:3) | pos | 630.5820 | C41 H76 O3 N1 |
| pos_96  | Cer(t18:0/24:3) | pos | 644.5976 | C42 H78 O3 N1 |
| pos_99  | ChE(16:0)       | pos | 642.6184 | C43 H80 O2 N1 |
| pos_102 | ChE(18:0)       | pos | 670.6497 | C45 H84 O2 N1 |
| pos_103 | ChE(18:1)       | pos | 668.6340 | C45 H82 O2 N1 |
| pos_105 | ChE(19:1)       | pos | 682.6497 | C46 H84 O2 N1 |
| pos_106 | ChE(20:1)       | pos | 696.6653 | C47 H86 O2 N1 |
| pos_107 | ChE(20:2)       | pos | 694.6497 | C47 H84 O2 N1 |
| pos_110 | ChE(20:5)       | pos | 671.5762 | C47 H75 O2    |
| pos_111 | ChE(22:1)       | pos | 724.6966 | C49 H90 O2 N1 |
| pos_112 | ChE(22:2)       | pos | 722.6810 | C49 H88 O2 N1 |
| pos_113 | ChE(22:4)       | pos | 718.6497 | C49 H84 O2 N1 |
| pos_114 | ChE(22:5)       | pos | 716.6340 | C49 H82 O2 N1 |

---

# Supplementary Material

|         |                |     |          |                |
|---------|----------------|-----|----------|----------------|
| pos_115 | ChE(22:6)      | pos | 697.5918 | C49 H77 O2     |
| pos_116 | ChE(24:1)      | pos | 752.7279 | C51 H94 O2 N1  |
| pos_117 | ChE(24:2)      | pos | 750.7123 | C51 H92 O2 N1  |
| pos_118 | ChE(30:5)      | pos | 828.7592 | C57 H98 O2 N1  |
| pos_119 | Co(Q10)        | pos | 863.6912 | C59 H91 O4     |
| pos_120 | Co(Q8)         | pos | 727.5660 | C49 H75 O4     |
| pos_121 | Co(Q9)         | pos | 795.6286 | C54 H83 O4     |
| pos_122 | DG(16:1/12:0)  | pos | 533.4176 | C31 H58 O5 Na1 |
| pos_123 | DG(16:0/14:0)  | pos | 558.5092 | C33 H68 O5 N1  |
| pos_124 | DG(16:1/14:0)  | pos | 556.4936 | C33 H66 O5 N1  |
| pos_125 | DG(16:1/14:1)  | pos | 554.4779 | C33 H64 O5 N1  |
| pos_126 | DG(18:4/12:0)  | pos | 555.4020 | C33 H56 O5 Na1 |
| pos_130 | DG(16:0/16:0)  | pos | 586.5405 | C35 H72 O5 N1  |
| pos_131 | DG(18:1/14:0)  | pos | 584.5249 | C35 H70 O5 N1  |
| pos_132 | DG(16:0/16:1)  | pos | 584.5249 | C35 H70 O5 N1  |
| pos_133 | DG(16:1e/16:0) | pos | 575.5010 | C35 H68 O4 Na1 |
| pos_134 | DG(16:1/16:1)  | pos | 582.5092 | C35 H68 O5 N1  |
| pos_135 | DG(14:0/18:3)  | pos | 563.4670 | C35 H63 O5     |
| pos_136 | DG(18:4/14:0)  | pos | 578.4779 | C35 H64 O5 N1  |
| pos_137 | DG(12:0/20:5)  | pos | 581.4176 | C35 H58 O5 Na1 |
| pos_138 | DG(10:0/22:6)  | pos | 574.4466 | C35 H60 O5 N1  |
| pos_139 | DG(16:0/17:0)  | pos | 600.5562 | C36 H74 O5 N1  |
| pos_140 | DG(15:0/18:1)  | pos | 598.5405 | C36 H72 O5 N1  |

---

|         |                |     |          |               |
|---------|----------------|-----|----------|---------------|
| pos_141 | DG(17:1/16:0)  | pos | 598.5405 | C36 H72 O5 N1 |
| pos_142 | DG(17:1/16:1)  | pos | 596.5249 | C36 H70 O5 N1 |
| pos_143 | DG(15:0/18:3)  | pos | 594.5092 | C36 H68 O5 N1 |
| pos_144 | DG(18:4/15:0)  | pos | 592.4936 | C36 H66 O5 N1 |
| pos_148 | DG(18:0/16:1)  | pos | 612.5562 | C37 H74 O5 N1 |
| pos_149 | DG(16:1/18:1)  | pos | 610.5405 | C37 H72 O5 N1 |
| pos_150 | DG(16:1/18:2)  | pos | 608.5249 | C37 H70 O5 N1 |
| pos_151 | DG(16:0/18:3)  | pos | 591.4983 | C37 H67 O5    |
| pos_152 | DG(16:1/18:3)  | pos | 606.5092 | C37 H68 O5 N1 |
| pos_153 | DG(18:4/16:0)  | pos | 589.4827 | C37 H65 O5    |
| pos_154 | DG(18:3e/16:1) | pos | 575.5034 | C37 H67 O4    |
| pos_155 | DG(18:4/16:1)  | pos | 587.4670 | C37 H63 O5    |
| pos_156 | DG(14:0/20:5)  | pos | 587.4670 | C37 H63 O5    |
| pos_157 | DG(20:5/14:1)  | pos | 602.4779 | C37 H64 O5 N1 |
| pos_158 | DG(12:0/22:6)  | pos | 602.4779 | C37 H64 O5 N1 |
| pos_160 | DG(19:1/16:0)  | pos | 626.5718 | C38 H76 O5 N1 |
| pos_161 | DG(17:0/18:1)  | pos | 626.5718 | C38 H76 O5 N1 |
| pos_162 | DG(17:1/18:1)  | pos | 624.5562 | C38 H74 O5 N1 |
| pos_163 | DG(17:1/18:2)  | pos | 622.5405 | C38 H72 O5 N1 |
| pos_164 | DG(17:0/18:3)  | pos | 605.5140 | C38 H69 O5    |
| pos_165 | DG(15:0/20:4)  | pos | 620.5249 | C38 H70 O5 N1 |
| pos_167 | DG(22:6/13:0)  | pos | 616.4936 | C38 H66 O5 N1 |
| pos_168 | DG(18:0/18:0)  | pos | 642.6031 | C39 H80 O5 N1 |

---

# Supplementary Material

|         |                |     |          |                |
|---------|----------------|-----|----------|----------------|
| pos_169 | DG(18:0/18:1)  | pos | 645.5428 | C39 H74 O5 Na1 |
| pos_170 | DG(16:0/20:1)  | pos | 640.5875 | C39 H78 O5 N1  |
| pos_171 | DG(18:1/18:1)  | pos | 643.5272 | C39 H72 O5 Na1 |
| pos_172 | DG(18:0/18:2)  | pos | 638.5718 | C39 H76 O5 N1  |
| pos_173 | DG(18:1/18:2)  | pos | 636.5562 | C39 H74 O5 N1  |
| pos_178 | DG(18:3e/18:1) | pos | 603.5347 | C39 H71 O4     |
| pos_180 | DG(16:0/20:5)  | pos | 632.5249 | C39 H70 O5 N1  |
| pos_181 | DG(18:3e/18:2) | pos | 601.5190 | C39 H69 O4     |
| pos_183 | DG(22:5/14:1)  | pos | 635.4646 | C39 H64 O5 Na1 |
| pos_184 | DG(16:1/20:5)  | pos | 630.5092 | C39 H68 O5 N1  |
| pos_185 | DG(18:4/18:3)  | pos | 628.4936 | C39 H66 O5 N1  |
| pos_186 | DG(22:6/14:1)  | pos | 628.4936 | C39 H66 O5 N1  |
| pos_187 | DG(18:4/18:4)  | pos | 609.4514 | C39 H61 O5     |
| pos_188 | DG(22:6/14:2)  | pos | 626.4779 | C39 H64 O5 N1  |
| pos_189 | DG(22:6/14:3)  | pos | 624.4623 | C39 H62 O5 N1  |
| pos_190 | DG(19:0/18:1)  | pos | 654.6031 | C40 H80 O5 N1  |
| pos_191 | DG(17:0/20:1)  | pos | 654.6031 | C40 H80 O5 N1  |
| pos_193 | DG(17:1/20:2)  | pos | 650.5718 | C40 H76 O5 N1  |
| pos_194 | DG(17:0/20:3)  | pos | 633.5453 | C40 H73 O5     |
| pos_195 | DG(15:0/22:4)  | pos | 648.5562 | C40 H74 O5 N1  |
| pos_197 | DG(17:1/20:4)  | pos | 646.5405 | C40 H72 O5 N1  |
| pos_198 | DG(15:0/22:5)  | pos | 629.5140 | C40 H69 O5     |
| pos_199 | DG(17:0/20:5)  | pos | 646.5405 | C40 H72 O5 N1  |



---

|         |                |     |          |                |
|---------|----------------|-----|----------|----------------|
| pos_200 | DG(17:1/20:5)  | pos | 644.5249 | C40 H70 O5 N1  |
| pos_201 | DG(15:0/22:6)  | pos | 644.5249 | C40 H70 O5 N1  |
| pos_202 | DG(16:0/22:1)  | pos | 673.5741 | C41 H78 O5 Na1 |
| pos_203 | DG(20:1/18:1)  | pos | 666.6031 | C41 H80 O5 N1  |
| pos_204 | DG(16:1e/22:1) | pos | 657.5792 | C41 H78 O4 Na1 |
| pos_205 | DG(18:1/20:2)  | pos | 664.5875 | C41 H78 O5 N1  |
| pos_206 | DG(18:1/20:3)  | pos | 645.5453 | C41 H73 O5     |
| pos_207 | DG(16:0/22:4)  | pos | 662.5718 | C41 H76 O5 N1  |
| pos_208 | DG(18:0/20:4)  | pos | 662.5718 | C41 H76 O5 N1  |
| pos_210 | DG(18:0/20:5)  | pos | 660.5562 | C41 H74 O5 N1  |
| pos_211 | DG(16:0/22:5)  | pos | 643.5296 | C41 H71 O5     |
| pos_212 | DG(20:4e/18:1) | pos | 629.5503 | C41 H73 O4     |
| pos_213 | DG(18:1/20:5)  | pos | 641.5140 | C41 H69 O5     |
| pos_214 | DG(16:1/22:5)  | pos | 641.5140 | C41 H69 O5     |
| pos_215 | DG(16:0/22:6)  | pos | 658.5405 | C41 H72 O5 N1  |
| pos_216 | DG(18:3/20:4)  | pos | 639.4983 | C41 H67 O5     |
| pos_217 | DG(16:1/22:6)  | pos | 639.4983 | C41 H67 O5     |
| pos_218 | DG(18:3/20:5)  | pos | 637.4827 | C41 H65 O5     |
| pos_219 | DG(18:4/20:5)  | pos | 635.4670 | C41 H63 O5     |
| pos_220 | DG(17:1/22:1)  | pos | 680.6188 | C42 H82 O5 N1  |
| pos_221 | DG(17:1/22:2)  | pos | 678.6031 | C42 H80 O5 N1  |
| pos_222 | DG(19:0/20:3)  | pos | 678.6031 | C42 H80 O5 N1  |
| pos_224 | DG(19:0/20:4)  | pos | 676.5875 | C42 H78 O5 N1  |

---

# Supplementary Material

|         |                |     |          |                |
|---------|----------------|-----|----------|----------------|
| pos_225 | DG(17:0/22:5)  | pos | 674.5718 | C42 H76 O5 N1  |
| pos_226 | DG(17:1/22:4)  | pos | 657.5453 | C42 H73 O5     |
| pos_227 | DG(17:1/22:5)  | pos | 672.5562 | C42 H74 O5 N1  |
| pos_228 | DG(17:0/22:6)  | pos | 672.5562 | C42 H74 O5 N1  |
| pos_229 | DG(17:1/22:6)  | pos | 670.5405 | C42 H72 O5 N1  |
| pos_231 | DG(18:4/22:6)  | pos | 661.4827 | C43 H65 O5     |
| pos_232 | DG(18:1/22:1)  | pos | 694.6344 | C43 H84 O5 N1  |
| pos_233 | DG(18:1/22:2)  | pos | 692.6188 | C43 H82 O5 N1  |
| pos_234 | DG(18:3/22:1)  | pos | 690.6031 | C43 H80 O5 N1  |
| pos_235 | DG(18:0/22:4)  | pos | 690.6031 | C43 H80 O5 N1  |
| pos_236 | DG(20:0/20:4)  | pos | 690.6031 | C43 H80 O5 N1  |
| pos_237 | DG(18:1/22:4)  | pos | 688.5875 | C43 H78 O5 N1  |
| pos_238 | DG(20:1/20:4)  | pos | 671.5609 | C43 H75 O5     |
| pos_239 | DG(18:0/22:5)  | pos | 688.5875 | C43 H78 O5 N1  |
| pos_240 | DG(18:1/22:5)  | pos | 669.5453 | C43 H73 O5     |
| pos_241 | DG(18:0/22:6)  | pos | 686.5718 | C43 H76 O5 N1  |
| pos_242 | DG(20:3/20:4)  | pos | 689.5115 | C43 H70 O5 Na1 |
| pos_243 | DG(22:5/18:2)  | pos | 667.5296 | C43 H71 O5     |
| pos_244 | DG(18:1/22:6)  | pos | 684.5562 | C43 H74 O5 N1  |
| pos_245 | DG(18:3/22:5)  | pos | 682.5405 | C43 H72 O5 N1  |
| pos_246 | DG(18:2/22:6)  | pos | 682.5405 | C43 H72 O5 N1  |
| pos_247 | DG(18:2e/22:6) | pos | 651.5347 | C43 H71 O4     |
| pos_248 | DG(18:3/22:6)  | pos | 680.5249 | C43 H70 O5 N1  |

---

|         |                |     |          |               |
|---------|----------------|-----|----------|---------------|
| pos_249 | DG(19:0/22:5)  | pos | 702.6031 | C44 H80 O5 N1 |
| pos_250 | DG(19:1/22:5)  | pos | 700.5875 | C44 H78 O5 N1 |
| pos_251 | DG(19:0/22:6)  | pos | 700.5875 | C44 H78 O5 N1 |
| pos_252 | DG(19:1/22:6)  | pos | 698.5718 | C44 H76 O5 N1 |
| pos_254 | DG(20:5/22:6)  | pos | 687.4983 | C45 H67 O5    |
| pos_256 | DG(24:1/18:2)  | pos | 720.6501 | C45 H86 O5 N1 |
| pos_258 | DG(20:1/22:4)  | pos | 716.6188 | C45 H82 O5 N1 |
| pos_260 | DG(20:0/22:5)  | pos | 716.6188 | C45 H82 O5 N1 |
| pos_261 | DG(20:1/22:5)  | pos | 697.5766 | C45 H77 O5    |
| pos_262 | DG(20:0/22:6)  | pos | 714.6031 | C45 H80 O5 N1 |
| pos_264 | DG(20:1/22:6)  | pos | 712.5875 | C45 H78 O5 N1 |
| pos_266 | DG(20:2/22:6)  | pos | 710.5718 | C45 H76 O5 N1 |
| pos_267 | DG(22:5/20:4)  | pos | 708.5562 | C45 H74 O5 N1 |
| pos_269 | DG(22:5/21:1)  | pos | 728.6188 | C46 H82 O5 N1 |
| pos_270 | DG(22:6/21:0)  | pos | 728.6188 | C46 H82 O5 N1 |
| pos_271 | DG(22:6/21:1)  | pos | 726.6031 | C46 H80 O5 N1 |
| pos_272 | DG(22:5/22:5)  | pos | 717.5453 | C47 H73 O5    |
| pos_274 | DG(22:5/22:6)  | pos | 715.5296 | C47 H71 O5    |
| pos_275 | DG(22:6/22:6)  | pos | 713.5140 | C47 H69 O5    |
| pos_276 | DG(22:1/22:4)  | pos | 744.6501 | C47 H86 O5 N1 |
| pos_277 | DG(20:4e/24:1) | pos | 713.6442 | C47 H85 O4    |
| pos_279 | DG(22:0/22:6)  | pos | 742.6344 | C47 H84 O5 N1 |
| pos_281 | DG(22:1/22:6)  | pos | 740.6188 | C47 H82 O5 N1 |

---

# Supplementary Material

|         |                     |     |          |                 |
|---------|---------------------|-----|----------|-----------------|
| pos_282 | DG(22:4/22:4)       | pos | 738.6031 | C47 H80 O5 N1   |
| pos_284 | DG(22:4/22:5)       | pos | 736.5875 | C47 H78 O5 N1   |
| pos_285 | DG(22:6/23:1)       | pos | 754.6344 | C48 H84 O5 N1   |
| pos_286 | DG(24:1/22:5)       | pos | 770.6657 | C49 H88 O5 N1   |
| pos_287 | DG(24:1/22:6)       | pos | 768.6501 | C49 H86 O5 N1   |
| pos_288 | DG(24:2/22:6)       | pos | 766.6344 | C49 H84 O5 N1   |
| pos_289 | DG(35:0/16:0)       | pos | 873.7672 | C54 H106 O5 K1  |
| pos_290 | DG(33:0/18:1)       | pos | 850.8222 | C54 H108 O5 N1  |
| pos_291 | DG(36:0/16:0)       | pos | 887.7828 | C55 H108 O5 K1  |
| pos_292 | DG(37:0/16:0)       | pos | 901.7985 | C56 H110 O5 K1  |
| pos_293 | DG(37:1/16:0)       | pos | 899.7828 | C56 H108 O5 K1  |
| pos_294 | DG(38:0/16:0)       | pos | 915.8141 | C57 H112 O5 K1  |
| pos_295 | DG(38:1/16:0)       | pos | 913.7985 | C57 H110 O5 K1  |
| pos_296 | DG(34:1/20:4)       | pos | 889.7619 | C57 H102 O5 Na1 |
| pos_298 | DG(33:1/24:1)       | pos | 932.9005 | C60 H118 O5 N1  |
| pos_299 | Hex1Cer(d16:1/16:0) | pos | 672.5409 | C38 H74 O8 N1   |
| pos_301 | Hex1Cer(d16:1/22:0) | pos | 756.6348 | C44 H86 O8 N1   |
| pos_302 | Hex1Cer(d18:1/22:0) | pos | 784.6661 | C46 H90 O8 N1   |
| pos_303 | Hex1Cer(d16:1/24:1) | pos | 782.6504 | C46 H88 O8 N1   |
| pos_304 | Hex1Cer(d16:1/24:2) | pos | 780.6348 | C46 H86 O8 N1   |
| pos_305 | Hex1Cer(d17:1/24:1) | pos | 778.6555 | C47 H88 O7 N1   |
| pos_306 | Hex1Cer(d18:1/24:0) | pos | 812.6974 | C48 H94 O8 N1   |
| pos_307 | Hex1Cer(d16:1/26:1) | pos | 810.6817 | C48 H92 O8 N1   |

---

|         |                     |     |          |                  |
|---------|---------------------|-----|----------|------------------|
| pos_308 | Hex1Cer(d17:1/26:1) | pos | 824.6974 | C49 H94 O8 N1    |
| pos_309 | Hex1Cer(d18:1/26:1) | pos | 838.7130 | C50 H96 O8 N1    |
| pos_310 | Hex1Cer(t16:0/22:1) | pos | 754.6191 | C44 H84 O8 N1    |
| pos_311 | Hex1Cer(t16:0/24:1) | pos | 782.6504 | C46 H88 O8 N1    |
| pos_312 | Hex1Cer(t16:0/24:2) | pos | 780.6348 | C46 H86 O8 N1    |
| pos_313 | Hex1Cer(t16:0/26:1) | pos | 810.6817 | C48 H92 O8 N1    |
| pos_314 | Hex1Cer(t16:0/26:2) | pos | 808.6661 | C48 H90 O8 N1    |
| pos_315 | Hex1Cer(t18:0/24:3) | pos | 806.6504 | C48 H88 O8 N1    |
| pos_318 | Hex1Cer(t18:1/26:3) | pos | 832.6661 | C50 H90 O8 N1    |
| pos_319 | Hex1Cer(t20:0/26:4) | pos | 860.6974 | C52 H94 O8 N1    |
| pos_320 | Hex2Cer(d16:1/26:1) | pos | 972.7346 | C54 H102 O13 N1  |
| pos_322 | LPC(14:0e)          | pos | 454.3292 | C22 H49 O6 N1 P1 |
| pos_323 | LPC(14:1e)          | pos | 452.3136 | C22 H47 O6 N1 P1 |
| pos_324 | LPC(15:0)           | pos | 482.3241 | C23 H49 O7 N1 P1 |
| pos_325 | LPC(16:0)           | pos | 496.3398 | C24 H51 O7 N1 P1 |
| pos_326 | LPC(16:0e)          | pos | 482.3605 | C24 H53 O6 N1 P1 |
| pos_327 | LPC(16:1)           | pos | 494.3241 | C24 H49 O7 N1 P1 |
| pos_328 | LPC(16:1e)          | pos | 480.3449 | C24 H51 O6 N1 P1 |
| pos_329 | LPC(16:2e)          | pos | 478.3292 | C24 H49 O6 N1 P1 |
| pos_330 | LPC(17:0)           | pos | 510.3554 | C25 H53 O7 N1 P1 |
| pos_331 | LPC(17:1)           | pos | 508.3398 | C25 H51 O7 N1 P1 |
| pos_333 | LPC(18:0e)          | pos | 510.3918 | C26 H57 O6 N1 P1 |
| pos_334 | LPC(18:1)           | pos | 522.3554 | C26 H53 O7 N1 P1 |

---

# Supplementary Material

|         |            |     |          |                      |
|---------|------------|-----|----------|----------------------|
| pos_335 | LPC(18:1e) | pos | 508.3762 | C26 H55 O6 N1 P1     |
| pos_336 | LPC(18:2)  | pos | 520.3398 | C26 H51 O7 N1 P1     |
| pos_337 | LPC(18:2e) | pos | 506.3605 | C26 H53 O6 N1 P1     |
| pos_338 | LPC(18:3)  | pos | 540.3061 | C26 H48 O7 N1 P1 Na1 |
| pos_339 | LPC(18:3e) | pos | 504.3449 | C26 H51 O6 N1 P1     |
| pos_340 | LPC(18:4)  | pos | 516.3085 | C26 H47 O7 N1 P1     |
| pos_341 | LPC(19:0)  | pos | 538.3867 | C27 H57 O7 N1 P1     |
| pos_342 | LPC(19:1)  | pos | 536.3711 | C27 H55 O7 N1 P1     |
| pos_343 | LPC(20:0)  | pos | 552.4024 | C28 H59 O7 N1 P1     |
| pos_344 | LPC(20:0e) | pos | 538.4231 | C28 H61 O6 N1 P1     |
| pos_345 | LPC(20:1)  | pos | 572.3687 | C28 H56 O7 N1 P1 Na1 |
| pos_346 | LPC(20:1e) | pos | 536.4075 | C28 H59 O6 N1 P1     |
| pos_347 | LPC(20:2)  | pos | 570.3530 | C28 H54 O7 N1 P1 Na1 |
| pos_349 | LPC(20:3)  | pos | 546.3554 | C28 H53 O7 N1 P1     |
| pos_350 | LPC(20:3e) | pos | 532.3762 | C28 H55 O6 N1 P1     |
| pos_351 | LPC(20:4)  | pos | 566.3217 | C28 H50 O7 N1 P1 Na1 |
| pos_352 | LPC(20:4e) | pos | 530.3605 | C28 H53 O6 N1 P1     |
| pos_353 | LPC(20:5)  | pos | 564.3061 | C28 H48 O7 N1 P1 Na1 |
| pos_355 | LPC(22:0)  | pos | 580.4337 | C30 H63 O7 N1 P1     |
| pos_356 | LPC(22:1)  | pos | 578.4180 | C30 H61 O7 N1 P1     |
| pos_358 | LPC(22:3)  | pos | 574.3867 | C30 H57 O7 N1 P1     |
| pos_359 | LPC(22:4)  | pos | 594.3530 | C30 H54 O7 N1 P1 Na1 |
| pos_360 | LPC(22:5)  | pos | 592.3374 | C30 H52 O7 N1 P1 Na1 |

---

|         |            |     |          |                      |
|---------|------------|-----|----------|----------------------|
| pos_361 | LPC(22:6)  | pos | 590.3217 | C30 H50 O7 N1 P1 Na1 |
| pos_362 | LPC(23:0)  | pos | 594.4493 | C31 H65 O7 N1 P1     |
| pos_363 | LPC(23:1)  | pos | 592.4337 | C31 H63 O7 N1 P1     |
| pos_364 | LPC(24:0)  | pos | 608.4650 | C32 H67 O7 N1 P1     |
| pos_366 | LPC(24:2)  | pos | 604.4337 | C32 H63 O7 N1 P1     |
| pos_367 | LPC(26:1)  | pos | 634.4806 | C34 H69 O7 N1 P1     |
| pos_368 | LPC(28:0)  | pos | 664.5276 | C36 H75 O7 N1 P1     |
| pos_369 | LPC(28:1)  | pos | 662.5119 | C36 H73 O7 N1 P1     |
| pos_370 | LPC(30:0)  | pos | 714.5408 | C38 H78 O7 N1 P1 Na1 |
| pos_371 | LPC(30:1)  | pos | 712.5252 | C38 H76 O7 N1 P1 Na1 |
| pos_372 | LPC(31:0)  | pos | 728.5565 | C39 H80 O7 N1 P1 Na1 |
| pos_373 | LPC(32:0)  | pos | 742.5721 | C40 H82 O7 N1 P1 Na1 |
| pos_374 | LPC(32:1)  | pos | 740.5565 | C40 H80 O7 N1 P1 Na1 |
| pos_375 | LPC(33:1)  | pos | 754.5721 | C41 H82 O7 N1 P1 Na1 |
| pos_376 | LPC(34:1)  | pos | 768.5878 | C42 H84 O7 N1 P1 Na1 |
| pos_377 | LPE(16:0)  | pos | 476.2748 | C21 H44 O7 N1 P1 Na1 |
| pos_378 | LPE(16:1)  | pos | 474.2591 | C21 H42 O7 N1 P1 Na1 |
| pos_379 | LPE(16:1e) | pos | 460.2798 | C21 H44 O6 N1 P1 Na1 |
| pos_380 | LPE(18:0)  | pos | 504.3061 | C23 H48 O7 N1 P1 Na1 |
| pos_382 | LPE(18:1e) | pos | 488.3111 | C23 H48 O6 N1 P1 Na1 |
| pos_383 | LPE(18:2e) | pos | 486.2955 | C23 H46 O6 N1 P1 Na1 |
| pos_384 | LPE(20:4)  | pos | 524.2748 | C25 H44 O7 N1 P1 Na1 |
| pos_386 | LPE(22:6)  | pos | 548.2748 | C27 H44 O7 N1 P1 Na1 |

---

# Supplementary Material

|         |                  |     |          |                      |
|---------|------------------|-----|----------|----------------------|
| pos_387 | LPG(18:1)        | pos | 533.2850 | C24 H47 O9 N0 P1 Na1 |
| pos_388 | LPS(18:1)        | pos | 524.2983 | C24 H47 O9 N1 P1     |
| pos_389 | LPS(22:6)        | pos | 592.2646 | C28 H44 O9 N1 P1 Na1 |
| pos_390 | LdMePE(18:1)     | pos | 508.3398 | C25 H51 O7 N1 P1     |
| pos_393 | MePC(8:1e/8:0)   | pos | 525.3663 | C25 H54 O7 N2 P1     |
| pos_394 | MePC(8:0/11:2)   | pos | 584.3323 | C28 H52 O8 N1 P1 Na1 |
| pos_395 | MePC(8:0/11:3)   | pos | 582.3166 | C28 H50 O8 N1 P1 Na1 |
| pos_396 | MePC(8:0e/11:4)  | pos | 566.3217 | C28 H50 O7 N1 P1 Na1 |
| pos_397 | MePC(6:0/14:3)   | pos | 596.3323 | C29 H52 O8 N1 P1 Na1 |
| pos_398 | MePC(8:0e/12:3)  | pos | 582.3530 | C29 H54 O7 N1 P1 Na1 |
| pos_400 | MePC(11:0/18:2)  | pos | 747.5647 | C40 H80 O8 N2 P1     |
| pos_401 | MePC(18:0e/11:4) | pos | 729.5541 | C40 H78 O7 N2 P1     |
| pos_402 | MePC(12:0/18:2)  | pos | 761.5803 | C41 H82 O8 N2 P1     |
| pos_403 | MePC(10:0e/20:4) | pos | 720.4939 | C39 H72 O7 N1 P1 Na1 |
| pos_404 | MePC(8:0/22:5)   | pos | 732.4575 | C39 H68 O8 N1 P1 Na1 |
| pos_405 | MePC(11:0/20:2)  | pos | 775.5960 | C42 H84 O8 N2 P1     |
| pos_406 | MePC(11:0/20:3)  | pos | 773.5803 | C42 H82 O8 N2 P1     |
| pos_407 | MePC(11:0/20:4)  | pos | 771.5647 | C42 H80 O8 N2 P1     |
| pos_408 | MePC(20:0e/11:4) | pos | 757.5854 | C42 H82 O7 N2 P1     |
| pos_409 | MePC(16:0/16:1)  | pos | 763.5960 | C41 H84 O8 N2 P1     |
| pos_410 | MePC(16:1/16:1)  | pos | 789.6116 | C43 H86 O8 N2 P1     |
| pos_411 | MePC(14:0e/18:2) | pos | 752.5565 | C41 H80 O7 N1 P1 Na1 |
| pos_412 | MePC(10:0/22:3)  | pos | 759.5647 | C41 H80 O8 N2 P1     |



---

|         |                  |     |          |                      |
|---------|------------------|-----|----------|----------------------|
| pos_414 | MePC(12:0/20:4)  | pos | 762.5044 | C41 H74 O8 N1 P1 Na1 |
| pos_415 | MePC(12:0e/20:4) | pos | 748.5252 | C41 H76 O7 N1 P1 Na1 |
| pos_416 | MePC(12:1e/20:4) | pos | 746.5095 | C41 H74 O7 N1 P1 Na1 |
| pos_417 | MePC(10:0e/22:6) | pos | 744.4939 | C41 H72 O7 N1 P1 Na1 |
| pos_418 | MePC(15:0/18:2)  | pos | 775.5960 | C42 H84 O8 N2 P1     |
| pos_419 | MePC(15:0/18:3)  | pos | 773.5803 | C42 H82 O8 N2 P1     |
| pos_420 | MePC(20:4e/13:0) | pos | 757.5854 | C42 H82 O7 N2 P1     |
| pos_421 | MePC(11:0/22:5)  | pos | 797.5803 | C44 H82 O8 N2 P1     |
| pos_423 | MePC(16:0/18:2)  | pos | 817.6429 | C45 H90 O8 N2 P1     |
| pos_424 | MePC(16:1/18:2)  | pos | 815.6273 | C45 H88 O8 N2 P1     |
| pos_426 | MePC(16:1/18:3)  | pos | 790.5357 | C43 H78 O8 N1 P1 Na1 |
| pos_427 | MePC(14:0e/20:4) | pos | 776.5565 | C43 H80 O7 N1 P1 Na1 |
| pos_429 | MePC(14:1e/20:4) | pos | 774.5408 | C43 H78 O7 N1 P1 Na1 |
| pos_430 | MePC(12:0/22:6)  | pos | 786.5044 | C43 H74 O8 N1 P1 Na1 |
| pos_431 | MePC(12:0e/22:6) | pos | 772.5252 | C43 H76 O7 N1 P1 Na1 |
| pos_432 | MePC(20:4/14:3)  | pos | 784.4888 | C43 H72 O8 N1 P1 Na1 |
| pos_434 | MePC(20:4e/14:4) | pos | 763.5385 | C43 H76 O7 N2 P1     |
| pos_435 | MePC(22:6/12:3)  | pos | 780.4575 | C43 H68 O8 N1 P1 Na1 |
| pos_437 | MePC(17:1/18:2)  | pos | 829.6429 | C46 H90 O8 N2 P1     |
| pos_438 | MePC(15:0/20:5)  | pos | 797.5803 | C44 H82 O8 N2 P1     |
| pos_440 | MePC(18:1/18:2)  | pos | 820.5827 | C45 H84 O8 N1 P1 Na1 |
| pos_441 | MePC(18:1e/18:2) | pos | 806.6034 | C45 H86 O7 N1 P1 Na1 |
| pos_442 | MePC(16:0e/20:4) | pos | 804.5878 | C45 H84 O7 N1 P1 Na1 |

---

## Supplementary Material

|         |                  |     |          |                      |
|---------|------------------|-----|----------|----------------------|
| pos_443 | MePC(16:1/20:4)  | pos | 816.5514 | C45 H80 O8 N1 P1 Na1 |
| pos_444 | MePC(16:1e/20:4) | pos | 802.5721 | C45 H82 O7 N1 P1 Na1 |
| pos_445 | MePC(16:1/20:5)  | pos | 814.5357 | C45 H78 O8 N1 P1 Na1 |
| pos_446 | MePC(14:0e/22:6) | pos | 800.5565 | C45 H80 O7 N1 P1 Na1 |
| pos_447 | MePC(18:4/18:3)  | pos | 812.5201 | C45 H76 O8 N1 P1 Na1 |
| pos_448 | MePC(14:1e/22:6) | pos | 798.5408 | C45 H78 O7 N1 P1 Na1 |
| pos_449 | MePC(22:6/14:2)  | pos | 810.5044 | C45 H74 O8 N1 P1 Na1 |
| pos_450 | MePC(19:0/18:2)  | pos | 836.6140 | C46 H88 O8 N1 P1 Na1 |
| pos_451 | MePC(19:1/18:2)  | pos | 857.6742 | C48 H94 O8 N2 P1     |
| pos_454 | MePC(18:0e/20:4) | pos | 832.6191 | C47 H88 O7 N1 P1 Na1 |
| pos_455 | MePC(18:1/20:4)  | pos | 844.5827 | C47 H84 O8 N1 P1 Na1 |
| pos_456 | MePC(16:0/22:6)  | pos | 842.5670 | C47 H82 O8 N1 P1 Na1 |
| pos_457 | MePC(16:0e/22:6) | pos | 828.5878 | C47 H84 O7 N1 P1 Na1 |
| pos_458 | MePC(16:1/22:6)  | pos | 840.5514 | C47 H80 O8 N1 P1 Na1 |
| pos_459 | MePC(18:4/20:4)  | pos | 838.5357 | C47 H78 O8 N1 P1 Na1 |
| pos_460 | MePC(16:2e/22:6) | pos | 824.5565 | C47 H80 O7 N1 P1 Na1 |
| pos_461 | MePC(18:4/20:5)  | pos | 836.5201 | C47 H76 O8 N1 P1 Na1 |
| pos_463 | MePC(17:0/22:6)  | pos | 879.6586 | C50 H92 O8 N2 P1     |
| pos_465 | MePC(20:1/20:4)  | pos | 872.6140 | C49 H88 O8 N1 P1 Na1 |
| pos_466 | MePC(18:0/22:6)  | pos | 870.5983 | C49 H86 O8 N1 P1 Na1 |
| pos_467 | MePC(18:1/22:6)  | pos | 868.5827 | C49 H84 O8 N1 P1 Na1 |
| pos_468 | MePC(18:2/22:6)  | pos | 866.5670 | C49 H82 O8 N1 P1 Na1 |
| pos_469 | MePC(18:3e/22:6) | pos | 850.5721 | C49 H82 O7 N1 P1 Na1 |

---

|         |                  |     |          |                      |
|---------|------------------|-----|----------|----------------------|
| pos_470 | MePC(20:4e/21:0) | pos | 874.6660 | C50 H94 O7 N1 P1 Na1 |
| pos_471 | MePC(20:0/22:6)  | pos | 898.6296 | C51 H90 O8 N1 P1 Na1 |
| pos_472 | MePC(20:1/22:6)  | pos | 896.6140 | C51 H88 O8 N1 P1 Na1 |
| pos_473 | MePC(20:2/22:6)  | pos | 894.5983 | C51 H86 O8 N1 P1 Na1 |
| pos_474 | MePC(20:3/22:6)  | pos | 892.5827 | C51 H84 O8 N1 P1 Na1 |
| pos_475 | PC(8:1e/6:0)     | pos | 466.2928 | C22 H45 O7 N1 P1     |
| pos_476 | PC(12:0e/6:0)    | pos | 546.3530 | C26 H54 O7 N1 P1 Na1 |
| pos_477 | PC(12:1e/6:0)    | pos | 544.3374 | C26 H52 O7 N1 P1 Na1 |
| pos_478 | PC(8:0/11:2)     | pos | 548.3347 | C27 H51 O8 N1 P1     |
| pos_479 | PC(8:0e/11:2)    | pos | 534.3554 | C27 H53 O7 N1 P1     |
| pos_480 | PC(8:0e/11:3)    | pos | 532.3398 | C27 H51 O7 N1 P1     |
| pos_481 | PC(8:0e/11:4)    | pos | 530.3241 | C27 H49 O7 N1 P1     |
| pos_482 | PC(8:1e/11:4)    | pos | 528.3085 | C27 H47 O7 N1 P1     |
| pos_484 | PC(14:1e/6:0)    | pos | 572.3687 | C28 H56 O7 N1 P1 Na1 |
| pos_485 | PC(6:0/14:2)     | pos | 562.3503 | C28 H53 O8 N1 P1     |
| pos_486 | PC(6:0/14:3)     | pos | 560.3347 | C28 H51 O8 N1 P1     |
| pos_487 | PC(8:0e/13:0)    | pos | 566.4180 | C29 H61 O7 N1 P1     |
| pos_488 | PC(10:0/11:2)    | pos | 576.3660 | C29 H55 O8 N1 P1     |
| pos_489 | PC(10:0e/11:3)   | pos | 560.3711 | C29 H55 O7 N1 P1     |
| pos_490 | PC(10:0/11:4)    | pos | 572.3347 | C29 H51 O8 N1 P1     |
| pos_492 | PC(10:1e/11:4)   | pos | 556.3398 | C29 H51 O7 N1 P1     |
| pos_493 | PC(4:0/18:2)     | pos | 590.3816 | C30 H57 O8 N1 P1     |
| pos_494 | PC(4:0/18:3)     | pos | 588.3660 | C30 H55 O8 N1 P1     |

---

# Supplementary Material

|         |                |     |          |                      |
|---------|----------------|-----|----------|----------------------|
| pos_495 | PC(8:1e/15:0)  | pos | 592.4337 | C31 H63 O7 N1 P1     |
| pos_496 | PC(12:0e/11:4) | pos | 586.3867 | C31 H57 O7 N1 P1     |
| pos_497 | PC(12:1e/11:4) | pos | 584.3711 | C31 H55 O7 N1 P1     |
| pos_498 | PC(12:0e/12:0) | pos | 608.4650 | C32 H67 O7 N1 P1     |
| pos_499 | PC(10:1e/14:4) | pos | 598.3867 | C32 H57 O7 N1 P1     |
| pos_500 | PC(8:1e/18:2)  | pos | 630.4493 | C34 H65 O7 N1 P1     |
| pos_501 | PC(11:0/16:0)  | pos | 664.4912 | C35 H71 O8 N1 P1     |
| pos_502 | PC(11:0/16:1)  | pos | 662.4755 | C35 H69 O8 N1 P1     |
| pos_503 | PC(9:0/18:2)   | pos | 660.4599 | C35 H67 O8 N1 P1     |
| pos_504 | PC(14:0/14:0)  | pos | 700.4888 | C36 H72 O8 N1 P1 Na1 |
| pos_505 | PC(16:0/12:0)  | pos | 678.5068 | C36 H73 O8 N1 P1     |
| pos_506 | PC(16:0/13:0)  | pos | 692.5225 | C37 H75 O8 N1 P1     |
| pos_507 | PC(15:0/14:0)  | pos | 714.5044 | C37 H74 O8 N1 P1 Na1 |
| pos_508 | PC(8:0e/21:0)  | pos | 678.5432 | C37 H77 O7 N1 P1     |
| pos_509 | PC(16:1/13:0)  | pos | 690.5068 | C37 H73 O8 N1 P1     |
| pos_510 | PC(8:1e/21:0)  | pos | 676.5276 | C37 H75 O7 N1 P1     |
| pos_511 | PC(11:0/18:2)  | pos | 688.4912 | C37 H71 O8 N1 P1     |
| pos_512 | PC(16:0/14:0)  | pos | 706.5381 | C38 H77 O8 N1 P1     |
| pos_513 | PC(14:0e/16:0) | pos | 692.5589 | C38 H79 O7 N1 P1     |
| pos_514 | PC(16:1/14:0)  | pos | 726.5044 | C38 H74 O8 N1 P1 Na1 |
| pos_515 | PC(16:0/14:1)  | pos | 704.5225 | C38 H75 O8 N1 P1     |
| pos_516 | PC(12:0e/18:1) | pos | 690.5432 | C38 H77 O7 N1 P1     |
| pos_517 | PC(14:0e/16:1) | pos | 690.5432 | C38 H77 O7 N1 P1     |

---

|         |                |     |          |                      |
|---------|----------------|-----|----------|----------------------|
| pos_518 | PC(12:0/18:2)  | pos | 702.5068 | C38 H73 O8 N1 P1     |
| pos_519 | PC(16:1/14:1)  | pos | 702.5068 | C38 H73 O8 N1 P1     |
| pos_520 | PC(14:1e/16:1) | pos | 688.5276 | C38 H75 O7 N1 P1     |
| pos_521 | PC(12:0e/18:2) | pos | 688.5276 | C38 H75 O7 N1 P1     |
| pos_522 | PC(8:0/22:3)   | pos | 700.4912 | C38 H71 O8 N1 P1     |
| pos_523 | PC(15:0/16:0)  | pos | 720.5538 | C39 H79 O8 N1 P1     |
| pos_524 | PC(17:0/14:0)  | pos | 720.5538 | C39 H79 O8 N1 P1     |
| pos_525 | PC(8:0e/23:0)  | pos | 706.5745 | C39 H81 O7 N1 P1     |
| pos_526 | PC(15:0/16:1)  | pos | 718.5381 | C39 H77 O8 N1 P1     |
| pos_528 | PC(14:0e/17:1) | pos | 704.5589 | C39 H79 O7 N1 P1     |
| pos_530 | PC(17:1/14:1)  | pos | 716.5225 | C39 H75 O8 N1 P1     |
| pos_531 | PC(16:2e/15:0) | pos | 702.5432 | C39 H77 O7 N1 P1     |
| pos_532 | PC(11:0/20:3)  | pos | 714.5068 | C39 H73 O8 N1 P1     |
| pos_533 | PC(20:5/11:4)  | pos | 702.4129 | C39 H61 O8 N1 P1     |
| pos_534 | PC(16:0/16:0)  | pos | 734.5694 | C40 H81 O8 N1 P1     |
| pos_536 | PC(16:0/16:1)  | pos | 754.5357 | C40 H78 O8 N1 P1 Na1 |
| pos_537 | PC(18:0/14:1)  | pos | 732.5538 | C40 H79 O8 N1 P1     |
| pos_538 | PC(14:0e/18:1) | pos | 718.5745 | C40 H81 O7 N1 P1     |
| pos_539 | PC(16:1e/16:0) | pos | 718.5745 | C40 H81 O7 N1 P1     |
| pos_540 | PC(16:1/16:1)  | pos | 752.5201 | C40 H76 O8 N1 P1 Na1 |
| pos_541 | PC(14:0e/18:2) | pos | 716.5589 | C40 H79 O7 N1 P1     |
| pos_542 | PC(16:1e/16:1) | pos | 716.5589 | C40 H79 O7 N1 P1     |
| pos_543 | PC(10:0/22:3)  | pos | 728.5225 | C40 H75 O8 N1 P1     |

---

## Supplementary Material

---

|         |                |     |          |                      |
|---------|----------------|-----|----------|----------------------|
| pos_544 | PC(14:1e/18:2) | pos | 714.5432 | C40 H77 O7 N1 P1     |
| pos_546 | PC(12:0e/20:4) | pos | 712.5276 | C40 H75 O7 N1 P1     |
| pos_547 | PC(12:1e/20:4) | pos | 710.5119 | C40 H73 O7 N1 P1     |
| pos_548 | PC(10:0e/22:6) | pos | 708.4963 | C40 H71 O7 N1 P1     |
| pos_550 | PC(18:0/15:0)  | pos | 748.5851 | C41 H83 O8 N1 P1     |
| pos_551 | PC(16:0/17:0)  | pos | 748.5851 | C41 H83 O8 N1 P1     |
| pos_554 | PC(17:1/16:0)  | pos | 768.5514 | C41 H80 O8 N1 P1 Na1 |
| pos_555 | PC(19:0/14:1)  | pos | 746.5694 | C41 H81 O8 N1 P1     |
| pos_556 | PC(16:0e/17:1) | pos | 732.5902 | C41 H83 O7 N1 P1     |
| pos_557 | PC(15:0/18:2)  | pos | 744.5538 | C41 H79 O8 N1 P1     |
| pos_558 | PC(16:2e/17:0) | pos | 730.5745 | C41 H81 O7 N1 P1     |
| pos_559 | PC(15:0/18:3)  | pos | 742.5381 | C41 H77 O8 N1 P1     |
| pos_560 | PC(11:0/22:4)  | pos | 740.5225 | C41 H75 O8 N1 P1     |
| pos_561 | PC(20:4/13:0)  | pos | 740.5225 | C41 H75 O8 N1 P1     |
| pos_563 | PC(11:0/22:5)  | pos | 738.5068 | C41 H73 O8 N1 P1     |
| pos_564 | PC(20:5/13:0)  | pos | 738.5068 | C41 H73 O8 N1 P1     |
| pos_565 | PC(11:0/22:6)  | pos | 736.4912 | C41 H71 O8 N1 P1     |
| pos_567 | PC(18:0e/16:0) | pos | 748.6215 | C42 H87 O7 N1 P1     |
| pos_569 | PC(16:1e/18:0) | pos | 746.6058 | C42 H85 O7 N1 P1     |
| pos_572 | PC(16:0/18:2)  | pos | 780.5514 | C42 H80 O8 N1 P1 Na1 |
| pos_573 | PC(16:0e/18:2) | pos | 744.5902 | C42 H83 O7 N1 P1     |
| pos_574 | PC(16:1e/18:1) | pos | 744.5902 | C42 H83 O7 N1 P1     |
| pos_576 | PC(16:0/18:3)  | pos | 778.5357 | C42 H78 O8 N1 P1 Na1 |

---

---

|         |                |     |          |                      |
|---------|----------------|-----|----------|----------------------|
| pos_577 | PC(18:3e/16:0) | pos | 742.5745 | C42 H81 O7 N1 P1     |
| pos_578 | PC(16:1e/18:2) | pos | 742.5745 | C42 H81 O7 N1 P1     |
| pos_579 | PC(16:1/18:3)  | pos | 754.5381 | C42 H77 O8 N1 P1     |
| pos_581 | PC(14:0e/20:4) | pos | 740.5589 | C42 H79 O7 N1 P1     |
| pos_582 | PC(18:4/16:1)  | pos | 752.5225 | C42 H75 O8 N1 P1     |
| pos_583 | PC(14:0/20:5)  | pos | 774.5044 | C42 H74 O8 N1 P1 Na1 |
| pos_584 | PC(20:4/14:1)  | pos | 752.5225 | C42 H75 O8 N1 P1     |
| pos_585 | PC(12:0e/22:5) | pos | 760.5252 | C42 H76 O7 N1 P1 Na1 |
| pos_586 | PC(14:1e/20:4) | pos | 738.5432 | C42 H77 O7 N1 P1     |
| pos_588 | PC(12:0e/22:6) | pos | 736.5276 | C42 H75 O7 N1 P1     |
| pos_589 | PC(14:1e/20:5) | pos | 736.5276 | C42 H75 O7 N1 P1     |
| pos_590 | PC(12:1e/22:6) | pos | 734.5119 | C42 H73 O7 N1 P1     |
| pos_591 | PC(18:0/17:0)  | pos | 776.6164 | C43 H87 O8 N1 P1     |
| pos_592 | PC(16:0/19:0)  | pos | 776.6164 | C43 H87 O8 N1 P1     |
| pos_593 | PC(16:1/19:0)  | pos | 774.6007 | C43 H85 O8 N1 P1     |
| pos_595 | PC(17:0/18:2)  | pos | 772.5851 | C43 H83 O8 N1 P1     |
| pos_596 | PC(16:2e/19:0) | pos | 758.6058 | C43 H85 O7 N1 P1     |
| pos_598 | PC(17:0/18:3)  | pos | 770.5694 | C43 H81 O8 N1 P1     |
| pos_599 | PC(16:2e/19:1) | pos | 756.5902 | C43 H83 O7 N1 P1     |
| pos_601 | PC(17:1/18:3)  | pos | 768.5538 | C43 H79 O8 N1 P1     |
| pos_602 | PC(20:4e/15:0) | pos | 754.5745 | C43 H81 O7 N1 P1     |
| pos_603 | PC(15:0/20:5)  | pos | 766.5381 | C43 H77 O8 N1 P1     |
| pos_604 | PC(22:6/13:0)  | pos | 764.5225 | C43 H75 O8 N1 P1     |

---

# Supplementary Material

|         |                |     |          |                      |
|---------|----------------|-----|----------|----------------------|
| pos_605 | PC(20:0/16:0)  | pos | 790.6320 | C44 H89 O8 N1 P1     |
| pos_606 | PC(18:0/18:0)  | pos | 790.6320 | C44 H89 O8 N1 P1     |
| pos_607 | PC(18:0/18:1)  | pos | 788.6164 | C44 H87 O8 N1 P1     |
| pos_608 | PC(16:0/20:1)  | pos | 788.6164 | C44 H87 O8 N1 P1     |
| pos_609 | PC(18:0e/18:1) | pos | 774.6371 | C44 H89 O7 N1 P1     |
| pos_610 | PC(18:1/18:1)  | pos | 808.5827 | C44 H84 O8 N1 P1 Na1 |
| pos_612 | PC(18:0e/18:2) | pos | 772.6215 | C44 H87 O7 N1 P1     |
| pos_613 | PC(16:0e/20:2) | pos | 794.6034 | C44 H86 O7 N1 P1 Na1 |
| pos_614 | PC(18:1/18:2)  | pos | 784.5851 | C44 H83 O8 N1 P1     |
| pos_615 | PC(16:0/20:3)  | pos | 784.5851 | C44 H83 O8 N1 P1     |
| pos_616 | PC(18:3e/18:0) | pos | 770.6058 | C44 H85 O7 N1 P1     |
| pos_617 | PC(18:1e/18:2) | pos | 770.6058 | C44 H85 O7 N1 P1     |
| pos_619 | PC(18:4/18:0)  | pos | 782.5694 | C44 H81 O8 N1 P1     |
| pos_620 | PC(16:0e/20:4) | pos | 768.5902 | C44 H83 O7 N1 P1     |
| pos_621 | PC(16:2e/20:2) | pos | 790.5721 | C44 H82 O7 N1 P1 Na1 |
| pos_622 | PC(16:1/20:4)  | pos | 780.5538 | C44 H79 O8 N1 P1     |
| pos_623 | PC(16:0/20:5)  | pos | 802.5357 | C44 H78 O8 N1 P1 Na1 |
| pos_624 | PC(16:1e/20:4) | pos | 766.5745 | C44 H81 O7 N1 P1     |
| pos_625 | PC(16:2e/20:3) | pos | 788.5565 | C44 H80 O7 N1 P1 Na1 |
| pos_626 | PC(14:0e/22:5) | pos | 788.5565 | C44 H80 O7 N1 P1 Na1 |
| pos_627 | PC(14:1e/22:4) | pos | 766.5745 | C44 H81 O7 N1 P1     |
| pos_628 | PC(16:1/20:5)  | pos | 778.5381 | C44 H77 O8 N1 P1     |
| pos_629 | PC(14:0/22:6)  | pos | 800.5201 | C44 H76 O8 N1 P1 Na1 |



---

|         |                |     |          |                      |
|---------|----------------|-----|----------|----------------------|
| pos_632 | PC(18:4/18:3)  | pos | 776.5225 | C44 H75 O8 N1 P1     |
| pos_633 | PC(22:6/14:1)  | pos | 776.5225 | C44 H75 O8 N1 P1     |
| pos_634 | PC(14:1e/22:6) | pos | 762.5432 | C44 H77 O7 N1 P1     |
| pos_636 | PC(16:0/21:0)  | pos | 804.6477 | C45 H91 O8 N1 P1     |
| pos_637 | PC(16:1/21:0)  | pos | 802.6320 | C45 H89 O8 N1 P1     |
| pos_638 | PC(19:0/18:2)  | pos | 800.6164 | C45 H87 O8 N1 P1     |
| pos_639 | PC(19:1/18:2)  | pos | 798.6007 | C45 H85 O8 N1 P1     |
| pos_641 | PC(18:3e/19:0) | pos | 806.6034 | C45 H86 O7 N1 P1 Na1 |
| pos_642 | PC(17:0/20:4)  | pos | 796.5851 | C45 H83 O8 N1 P1     |
| pos_643 | PC(19:1/18:3)  | pos | 796.5851 | C45 H83 O8 N1 P1     |
| pos_644 | PC(15:0/22:4)  | pos | 796.5851 | C45 H83 O8 N1 P1     |
| pos_645 | PC(20:4e/17:0) | pos | 782.6058 | C45 H85 O7 N1 P1     |
| pos_646 | PC(17:1/20:4)  | pos | 794.5694 | C45 H81 O8 N1 P1     |
| pos_647 | PC(15:0/22:5)  | pos | 816.5514 | C45 H80 O8 N1 P1 Na1 |
| pos_648 | PC(17:0/20:5)  | pos | 816.5514 | C45 H80 O8 N1 P1 Na1 |
| pos_649 | PC(20:4e/17:1) | pos | 780.5902 | C45 H83 O7 N1 P1     |
| pos_650 | PC(15:0/22:6)  | pos | 792.5538 | C45 H79 O8 N1 P1     |
| pos_651 | PC(17:1/20:5)  | pos | 814.5357 | C45 H78 O8 N1 P1 Na1 |
| pos_653 | PC(16:0/22:1)  | pos | 816.6477 | C46 H91 O8 N1 P1     |
| pos_654 | PC(20:0/18:1)  | pos | 838.6296 | C46 H90 O8 N1 P1 Na1 |
| pos_655 | PC(20:0e/18:1) | pos | 802.6684 | C46 H93 O7 N1 P1     |
| pos_656 | PC(20:1/18:1)  | pos | 836.6140 | C46 H88 O8 N1 P1 Na1 |
| pos_658 | PC(20:0e/18:2) | pos | 800.6528 | C46 H91 O7 N1 P1     |

---

# Supplementary Material

|         |                |     |          |                      |
|---------|----------------|-----|----------|----------------------|
| pos_659 | PC(20:1/18:2)  | pos | 812.6164 | C46 H87 O8 N1 P1     |
| pos_662 | PC(16:0/22:4)  | pos | 832.5827 | C46 H84 O8 N1 P1 Na1 |
| pos_663 | PC(16:0e/22:4) | pos | 796.6215 | C46 H87 O7 N1 P1     |
| pos_664 | PC(18:2e/20:2) | pos | 818.6034 | C46 H86 O7 N1 P1 Na1 |
| pos_665 | PC(18:0e/20:4) | pos | 796.6215 | C46 H87 O7 N1 P1     |
| pos_666 | PC(18:1/20:4)  | pos | 808.5851 | C46 H83 O8 N1 P1     |
| pos_667 | PC(16:0/22:5)  | pos | 808.5851 | C46 H83 O8 N1 P1     |
| pos_668 | PC(18:0/20:5)  | pos | 830.5670 | C46 H82 O8 N1 P1 Na1 |
| pos_669 | PC(16:2e/22:3) | pos | 816.5878 | C46 H84 O7 N1 P1 Na1 |
| pos_670 | PC(18:2e/20:3) | pos | 816.5878 | C46 H84 O7 N1 P1 Na1 |
| pos_671 | PC(16:0e/22:5) | pos | 816.5878 | C46 H84 O7 N1 P1 Na1 |
| pos_673 | PC(16:0/22:6)  | pos | 806.5694 | C46 H81 O8 N1 P1     |
| pos_674 | PC(16:1/22:5)  | pos | 806.5694 | C46 H81 O8 N1 P1     |
| pos_675 | PC(18:1/20:5)  | pos | 828.5514 | C46 H80 O8 N1 P1 Na1 |
| pos_676 | PC(16:2e/22:4) | pos | 814.5721 | C46 H82 O7 N1 P1 Na1 |
| pos_677 | PC(16:0e/22:6) | pos | 792.5902 | C46 H83 O7 N1 P1     |
| pos_679 | PC(20:5/18:2)  | pos | 826.5357 | C46 H78 O8 N1 P1 Na1 |
| pos_681 | PC(16:2e/22:5) | pos | 812.5565 | C46 H80 O7 N1 P1 Na1 |
| pos_682 | PC(18:3e/20:4) | pos | 812.5565 | C46 H80 O7 N1 P1 Na1 |
| pos_684 | PC(18:3/20:5)  | pos | 824.5201 | C46 H76 O8 N1 P1 Na1 |
| pos_685 | PC(16:2e/22:6) | pos | 788.5589 | C46 H79 O7 N1 P1     |
| pos_686 | PC(18:4/20:5)  | pos | 822.5044 | C46 H74 O8 N1 P1 Na1 |
| pos_687 | PC(16:1/23:0)  | pos | 830.6633 | C47 H93 O8 N1 P1     |

---

|         |                |     |          |                      |
|---------|----------------|-----|----------|----------------------|
| pos_688 | PC(15:0/24:2)  | pos | 828.6477 | C47 H91 O8 N1 P1     |
| pos_689 | PC(17:0/22:3)  | pos | 826.6320 | C47 H89 O8 N1 P1     |
| pos_690 | PC(19:1/20:2)  | pos | 826.6320 | C47 H89 O8 N1 P1     |
| pos_691 | PC(19:0/20:4)  | pos | 824.6164 | C47 H87 O8 N1 P1     |
| pos_692 | PC(19:1/20:3)  | pos | 824.6164 | C47 H87 O8 N1 P1     |
| pos_693 | PC(20:4e/19:0) | pos | 832.6191 | C47 H88 O7 N1 P1 Na1 |
| pos_694 | PC(19:1/20:4)  | pos | 822.6007 | C47 H85 O8 N1 P1     |
| pos_695 | PC(17:1/22:4)  | pos | 844.5827 | C47 H84 O8 N1 P1 Na1 |
| pos_696 | PC(17:0/22:5)  | pos | 844.5827 | C47 H84 O8 N1 P1 Na1 |
| pos_697 | PC(20:4e/19:1) | pos | 808.6215 | C47 H87 O7 N1 P1     |
| pos_698 | PC(17:0/22:6)  | pos | 820.5851 | C47 H83 O8 N1 P1     |
| pos_699 | PC(17:1/22:5)  | pos | 842.5670 | C47 H82 O8 N1 P1 Na1 |
| pos_700 | PC(17:1/22:6)  | pos | 818.5694 | C47 H81 O8 N1 P1     |
| pos_701 | PC(26:1/14:0)  | pos | 844.6790 | C48 H95 O8 N1 P1     |
| pos_703 | PC(20:5/20:5)  | pos | 848.5201 | C48 H76 O8 N1 P1 Na1 |
| pos_704 | PC(18:4/22:6)  | pos | 826.5381 | C48 H77 O8 N1 P1     |
| pos_705 | PC(16:0/24:2)  | pos | 842.6633 | C48 H93 O8 N1 P1     |
| pos_706 | PC(16:1/24:2)  | pos | 840.6477 | C48 H91 O8 N1 P1     |
| pos_708 | PC(20:0/20:4)  | pos | 838.6320 | C48 H89 O8 N1 P1     |
| pos_709 | PC(20:0e/20:4) | pos | 824.6528 | C48 H91 O7 N1 P1     |
| pos_710 | PC(20:2e/20:2) | pos | 846.6347 | C48 H90 O7 N1 P1 Na1 |
| pos_711 | PC(20:1/20:4)  | pos | 836.6164 | C48 H87 O8 N1 P1     |
| pos_714 | PC(18:3e/22:2) | pos | 844.6191 | C48 H88 O7 N1 P1 Na1 |

---

# Supplementary Material

|         |                |     |          |                      |
|---------|----------------|-----|----------|----------------------|
| pos_715 | PC(20:1e/20:4) | pos | 822.6371 | C48 H89 O7 N1 P1     |
| pos_716 | PC(18:2e/22:3) | pos | 844.6191 | C48 H88 O7 N1 P1 Na1 |
| pos_717 | PC(18:0/22:6)  | pos | 834.6007 | C48 H85 O8 N1 P1     |
| pos_718 | PC(18:1/22:5)  | pos | 834.6007 | C48 H85 O8 N1 P1     |
| pos_719 | PC(18:0e/22:6) | pos | 820.6215 | C48 H87 O7 N1 P1     |
| pos_720 | PC(18:2e/22:4) | pos | 842.6034 | C48 H86 O7 N1 P1 Na1 |
| pos_721 | PC(18:1/22:6)  | pos | 832.5851 | C48 H83 O8 N1 P1     |
| pos_722 | PC(18:3e/22:4) | pos | 840.5878 | C48 H84 O7 N1 P1 Na1 |
| pos_723 | PC(18:1e/22:6) | pos | 818.6058 | C48 H85 O7 N1 P1     |
| pos_724 | PC(18:2/22:6)  | pos | 830.5694 | C48 H81 O8 N1 P1     |
| pos_726 | PC(20:4e/20:4) | pos | 816.5902 | C48 H83 O7 N1 P1     |
| pos_727 | PC(18:2e/22:6) | pos | 816.5902 | C48 H83 O7 N1 P1     |
| pos_728 | PC(18:3e/22:5) | pos | 838.5721 | C48 H82 O7 N1 P1 Na1 |
| pos_729 | PC(20:5/20:4)  | pos | 850.5357 | C48 H78 O8 N1 P1 Na1 |
| pos_730 | PC(18:3/22:6)  | pos | 828.5538 | C48 H79 O8 N1 P1     |
| pos_732 | PC(18:3e/22:6) | pos | 814.5745 | C48 H81 O7 N1 P1     |
| pos_733 | PC(17:1/24:2)  | pos | 854.6633 | C49 H93 O8 N1 P1     |
| pos_735 | PC(19:0/22:5)  | pos | 850.6320 | C49 H89 O8 N1 P1     |
| pos_736 | PC(19:1/22:5)  | pos | 870.5983 | C49 H86 O8 N1 P1 Na1 |
| pos_737 | PC(19:0/22:6)  | pos | 848.6164 | C49 H87 O8 N1 P1     |
| pos_738 | PC(19:1/22:6)  | pos | 846.6007 | C49 H85 O8 N1 P1     |
| pos_740 | PC(20:4/22:6)  | pos | 854.5694 | C50 H81 O8 N1 P1     |
| pos_741 | PC(20:5/22:5)  | pos | 876.5514 | C50 H80 O8 N1 P1 Na1 |

---

|         |                |     |          |                      |
|---------|----------------|-----|----------|----------------------|
| pos_742 | PC(20:4e/22:6) | pos | 840.5902 | C50 H83 O7 N1 P1     |
| pos_743 | PC(20:5/22:6)  | pos | 874.5357 | C50 H78 O8 N1 P1 Na1 |
| pos_744 | PC(26:1/16:1)  | pos | 870.6946 | C50 H97 O8 N1 P1     |
| pos_745 | PC(20:0/22:4)  | pos | 866.6633 | C50 H93 O8 N1 P1     |
| pos_747 | PC(20:0/22:5)  | pos | 864.6477 | C50 H91 O8 N1 P1     |
| pos_748 | PC(31:1/11:4)  | pos | 864.6477 | C50 H91 O8 N1 P1     |
| pos_750 | PC(20:0/22:6)  | pos | 862.6320 | C50 H89 O8 N1 P1     |
| pos_751 | PC(20:0e/22:6) | pos | 848.6528 | C50 H91 O7 N1 P1     |
| pos_752 | PC(20:2e/22:4) | pos | 870.6347 | C50 H90 O7 N1 P1 Na1 |
| pos_753 | PC(20:1/22:6)  | pos | 860.6164 | C50 H87 O8 N1 P1     |
| pos_754 | PC(20:1e/22:6) | pos | 846.6371 | C50 H89 O7 N1 P1     |
| pos_755 | PC(22:4/20:4)  | pos | 858.6007 | C50 H85 O8 N1 P1     |
| pos_756 | PC(20:2/22:6)  | pos | 858.6007 | C50 H85 O8 N1 P1     |
| pos_757 | PC(20:2e/22:6) | pos | 844.6215 | C50 H87 O7 N1 P1     |
| pos_758 | PC(20:3/22:6)  | pos | 856.5851 | C50 H83 O8 N1 P1     |
| pos_759 | PC(22:5/20:4)  | pos | 878.5670 | C50 H82 O8 N1 P1 Na1 |
| pos_760 | PC(20:3e/22:6) | pos | 842.6058 | C50 H85 O7 N1 P1     |
| pos_761 | PC(22:6/21:0)  | pos | 876.6477 | C51 H91 O8 N1 P1     |
| pos_762 | PC(22:6/21:1)  | pos | 874.6320 | C51 H89 O8 N1 P1     |
| pos_763 | PC(22:4/22:6)  | pos | 882.6007 | C52 H85 O8 N1 P1     |
| pos_764 | PC(22:5/22:6)  | pos | 880.5851 | C52 H83 O8 N1 P1     |
| pos_765 | PC(22:6/22:6)  | pos | 900.5514 | C52 H80 O8 N1 P1 Na1 |
| pos_766 | PC(24:0/20:4)  | pos | 894.6946 | C52 H97 O8 N1 P1     |

---

# Supplementary Material

|         |                |     |          |                      |
|---------|----------------|-----|----------|----------------------|
| pos_768 | PC(20:3e/24:2) | pos | 878.6997 | C52 H97 O7 N1 P1     |
| pos_769 | PC(22:0/22:6)  | pos | 890.6633 | C52 H93 O8 N1 P1     |
| pos_770 | PC(20:4e/24:2) | pos | 876.6841 | C52 H95 O7 N1 P1     |
| pos_771 | PC(22:1/22:6)  | pos | 888.6477 | C52 H91 O8 N1 P1     |
| pos_774 | PC(24:1/22:6)  | pos | 916.6790 | C54 H95 O8 N1 P1     |
| pos_775 | PE(8:0e/8:0)   | pos | 454.2928 | C21 H45 O7 N1 P1     |
| pos_776 | PE(8:1e/9:0)   | pos | 466.2928 | C22 H45 O7 N1 P1     |
| pos_778 | PE(16:1/14:1)  | pos | 660.4599 | C35 H67 O8 N1 P1     |
| pos_779 | PE(16:0/16:1)  | pos | 690.5068 | C37 H73 O8 N1 P1     |
| pos_780 | PE(16:0p/16:1) | pos | 674.5119 | C37 H73 O7 N1 P1     |
| pos_781 | PE(16:1/16:1)  | pos | 710.4731 | C37 H70 O8 N1 P1 Na1 |
| pos_782 | PE(16:0p/17:1) | pos | 688.5276 | C38 H75 O7 N1 P1     |
| pos_783 | PE(17:1/16:1)  | pos | 702.5068 | C38 H73 O8 N1 P1     |
| pos_784 | PE(16:1e/17:1) | pos | 710.5095 | C38 H74 O7 N1 P1 Na1 |
| pos_785 | PE(16:0/18:1)  | pos | 740.5201 | C39 H76 O8 N1 P1 Na1 |
| pos_786 | PE(16:0p/18:1) | pos | 702.5432 | C39 H77 O7 N1 P1     |
| pos_787 | PE(16:1/18:1)  | pos | 716.5225 | C39 H75 O8 N1 P1     |
| pos_788 | PE(16:1e/18:1) | pos | 724.5252 | C39 H76 O7 N1 P1 Na1 |
| pos_790 | PE(16:1/18:2)  | pos | 736.4888 | C39 H72 O8 N1 P1 Na1 |
| pos_791 | PE(14:0p/20:4) | pos | 696.4963 | C39 H71 O7 N1 P1     |
| pos_792 | PE(14:0/20:5)  | pos | 710.4755 | C39 H69 O8 N1 P1     |
| pos_793 | PE(14:0p/20:5) | pos | 694.4806 | C39 H69 O7 N1 P1     |
| pos_794 | PE(18:0p/17:1) | pos | 716.5589 | C40 H79 O7 N1 P1     |

---

|         |                |     |          |                      |
|---------|----------------|-----|----------|----------------------|
| pos_795 | PE(18:1e/17:1) | pos | 738.5408 | C40 H78 O7 N1 P1 Na1 |
| pos_796 | PE(18:1p/17:1) | pos | 714.5432 | C40 H77 O7 N1 P1     |
| pos_797 | PE(17:0/19:0)  | pos | 770.5670 | C41 H82 O8 N1 P1 Na1 |
| pos_798 | PE(18:0/18:1)  | pos | 768.5514 | C41 H80 O8 N1 P1 Na1 |
| pos_799 | PE(18:0p/18:1) | pos | 730.5745 | C41 H81 O7 N1 P1     |
| pos_800 | PE(18:1e/18:1) | pos | 752.5565 | C41 H80 O7 N1 P1 Na1 |
| pos_801 | PE(18:1p/18:1) | pos | 728.5589 | C41 H79 O7 N1 P1     |
| pos_802 | PE(16:0/20:4)  | pos | 762.5044 | C41 H74 O8 N1 P1 Na1 |
| pos_803 | PE(16:0p/20:4) | pos | 724.5276 | C41 H75 O7 N1 P1     |
| pos_804 | PE(16:0/20:5)  | pos | 760.4888 | C41 H72 O8 N1 P1 Na1 |
| pos_805 | PE(16:1e/20:4) | pos | 746.5095 | C41 H74 O7 N1 P1 Na1 |
| pos_806 | PE(16:1p/20:4) | pos | 722.5119 | C41 H73 O7 N1 P1     |
| pos_807 | PE(16:0p/20:5) | pos | 722.5119 | C41 H73 O7 N1 P1     |
| pos_808 | PE(16:1/20:5)  | pos | 736.4912 | C41 H71 O8 N1 P1     |
| pos_809 | PE(14:0e/22:6) | pos | 744.4939 | C41 H72 O7 N1 P1 Na1 |
| pos_810 | PE(14:0p/22:6) | pos | 720.4963 | C41 H71 O7 N1 P1     |
| pos_811 | PE(14:1e/22:6) | pos | 742.4782 | C41 H70 O7 N1 P1 Na1 |
| pos_812 | PE(18:0/20:4)  | pos | 768.5538 | C43 H79 O8 N1 P1     |
| pos_813 | PE(16:0p/22:4) | pos | 752.5589 | C43 H79 O7 N1 P1     |
| pos_814 | PE(18:0p/20:4) | pos | 752.5589 | C43 H79 O7 N1 P1     |
| pos_815 | PE(18:1p/20:4) | pos | 750.5432 | C43 H77 O7 N1 P1     |
| pos_816 | PE(18:0p/20:5) | pos | 750.5432 | C43 H77 O7 N1 P1     |
| pos_817 | PE(16:0/22:6)  | pos | 786.5044 | C43 H74 O8 N1 P1 Na1 |

---

# Supplementary Material

|         |                |     |          |                      |
|---------|----------------|-----|----------|----------------------|
| pos_818 | PE(16:0e/22:6) | pos | 772.5252 | C43 H76 O7 N1 P1 Na1 |
| pos_819 | PE(18:1p/20:5) | pos | 748.5276 | C43 H75 O7 N1 P1     |
| pos_820 | PE(16:0p/22:6) | pos | 748.5276 | C43 H75 O7 N1 P1     |
| pos_821 | PE(16:1/22:6)  | pos | 762.5068 | C43 H73 O8 N1 P1     |
| pos_823 | PE(16:1p/22:6) | pos | 746.5119 | C43 H73 O7 N1 P1     |
| pos_824 | PE(16:1/24:2)  | pos | 820.5827 | C45 H84 O8 N1 P1 Na1 |
| pos_825 | PE(18:0p/22:4) | pos | 780.5902 | C45 H83 O7 N1 P1     |
| pos_826 | PE(20:0p/20:4) | pos | 780.5902 | C45 H83 O7 N1 P1     |
| pos_827 | PE(18:0/22:5)  | pos | 794.5694 | C45 H81 O8 N1 P1     |
| pos_828 | PE(20:1e/20:4) | pos | 802.5721 | C45 H82 O7 N1 P1 Na1 |
| pos_829 | PE(18:1p/22:4) | pos | 778.5745 | C45 H81 O7 N1 P1     |
| pos_830 | PE(18:0p/22:5) | pos | 778.5745 | C45 H81 O7 N1 P1     |
| pos_831 | PE(18:0/22:6)  | pos | 792.5538 | C45 H79 O8 N1 P1     |
| pos_832 | PE(18:2e/22:4) | pos | 778.5745 | C45 H81 O7 N1 P1     |
| pos_833 | PE(18:1p/22:5) | pos | 776.5589 | C45 H79 O7 N1 P1     |
| pos_834 | PE(18:0p/22:6) | pos | 776.5589 | C45 H79 O7 N1 P1     |
| pos_835 | PE(18:1/22:6)  | pos | 812.5201 | C45 H76 O8 N1 P1 Na1 |
| pos_836 | PE(18:1e/22:6) | pos | 798.5408 | C45 H78 O7 N1 P1 Na1 |
| pos_837 | PE(18:2/22:6)  | pos | 810.5044 | C45 H74 O8 N1 P1 Na1 |
| pos_838 | PE(18:2p/22:6) | pos | 772.5276 | C45 H75 O7 N1 P1     |
| pos_839 | PE(18:3/22:6)  | pos | 808.4888 | C45 H72 O8 N1 P1 Na1 |
| pos_840 | PE(20:4/22:6)  | pos | 812.5225 | C47 H75 O8 N1 P1     |
| pos_841 | PE(20:5/22:6)  | pos | 810.5068 | C47 H73 O8 N1 P1     |



---

|         |                |     |          |                      |
|---------|----------------|-----|----------|----------------------|
| pos_842 | PE(20:3/22:5)  | pos | 838.5357 | C47 H78 O8 N1 P1 Na1 |
| pos_843 | PE(20:3/22:6)  | pos | 836.5201 | C47 H76 O8 N1 P1 Na1 |
| pos_844 | PE(22:4/22:6)  | pos | 840.5538 | C49 H79 O8 N1 P1     |
| pos_845 | PE(22:5/22:6)  | pos | 838.5381 | C49 H77 O8 N1 P1     |
| pos_846 | PE(22:6/22:6)  | pos | 836.5225 | C49 H75 O8 N1 P1     |
| pos_847 | PEt(15:0/12:0) | pos | 607.4333 | C32 H64 O8 N0 P1     |
| pos_848 | PEt(15:0/13:0) | pos | 621.4490 | C33 H66 O8 N0 P1     |
| pos_849 | PEt(15:0/14:0) | pos | 635.4646 | C34 H68 O8 N0 P1     |
| pos_850 | PEt(15:0/14:1) | pos | 633.4490 | C34 H66 O8 N0 P1     |
| pos_852 | PEt(15:0/16:1) | pos | 661.4803 | C36 H70 O8 N0 P1     |
| pos_853 | PEt(15:0/17:0) | pos | 677.5116 | C37 H74 O8 N0 P1     |
| pos_854 | PEt(17:1/15:0) | pos | 675.4959 | C37 H72 O8 N0 P1     |
| pos_855 | PEt(18:0/15:0) | pos | 691.5272 | C38 H76 O8 N0 P1     |
| pos_856 | PEt(15:0/18:1) | pos | 689.5116 | C38 H74 O8 N0 P1     |
| pos_857 | PEt(15:0/18:2) | pos | 687.4959 | C38 H72 O8 N0 P1     |
| pos_858 | PEt(15:0/19:0) | pos | 705.5429 | C39 H78 O8 N0 P1     |
| pos_859 | PEt(19:1/15:0) | pos | 703.5272 | C39 H76 O8 N0 P1     |
| pos_860 | PEt(20:0/15:0) | pos | 719.5585 | C40 H80 O8 N0 P1     |
| pos_862 | PEt(15:0/20:1) | pos | 717.5429 | C40 H78 O8 N0 P1     |
| pos_863 | PEt(15:0/20:2) | pos | 715.5272 | C40 H76 O8 N0 P1     |
| pos_864 | PEt(15:0/21:0) | pos | 733.5742 | C41 H82 O8 N0 P1     |
| pos_865 | PEt(15:0/22:0) | pos | 747.5898 | C42 H84 O8 N0 P1     |
| pos_866 | PEt(15:0/22:1) | pos | 745.5742 | C42 H82 O8 N0 P1     |

---

## Supplementary Material

---

|         |                |     |          |                       |
|---------|----------------|-----|----------|-----------------------|
| pos_867 | PEt(15:0/22:2) | pos | 743.5585 | C42 H80 O8 N0 P1      |
| pos_868 | PEt(15:0/22:5) | pos | 737.5116 | C42 H74 O8 N0 P1      |
| pos_869 | PEt(15:0/22:6) | pos | 735.4959 | C42 H72 O8 N0 P1      |
| pos_870 | PEt(15:0/24:1) | pos | 773.6055 | C44 H86 O8 N0 P1      |
| pos_871 | PG(14:0/14:0)  | pos | 667.4545 | C34 H68 O10 N0 P1     |
| pos_872 | PG(16:1/14:0)  | pos | 693.4701 | C36 H70 O10 N0 P1     |
| pos_873 | PG(16:1/16:1)  | pos | 741.4677 | C38 H71 O10 N0 P1 Na1 |
| pos_874 | PG(18:0/14:4)  | pos | 732.4810 | C38 H71 O10 N1 P1     |
| pos_875 | PG(16:0/18:2)  | pos | 769.4990 | C40 H75 O10 N0 P1 Na1 |
| pos_877 | PG(28:0/16:0)  | pos | 908.7314 | C50 H103 O10 N1 P1    |
| pos_878 | PG(30:0/16:0)  | pos | 936.7627 | C52 H107 O10 N1 P1    |
| pos_879 | PG(30:1/16:0)  | pos | 917.7205 | C52 H102 O10 N0 P1    |
| pos_880 | PI(18:0/20:4)  | pos | 904.5910 | C47 H87 O13 N1 P1     |
| pos_881 | PI(16:0/22:6)  | pos | 900.5597 | C47 H83 O13 N1 P1     |
| pos_882 | PI(16:1/22:6)  | pos | 898.5440 | C47 H81 O13 N1 P1     |
| pos_883 | PI(18:0/22:6)  | pos | 928.5910 | C49 H87 O13 N1 P1     |
| pos_884 | PI(18:1/22:6)  | pos | 926.5753 | C49 H85 O13 N1 P1     |
| pos_886 | PI(22:6/22:6)  | pos | 972.5597 | C53 H83 O13 N1 P1     |
| pos_887 | PMe(16:0/12:0) | pos | 607.4333 | C32 H64 O8 N0 P1      |
| pos_889 | PMe(16:0/14:0) | pos | 635.4646 | C34 H68 O8 N0 P1      |
| pos_890 | PMe(16:0/14:1) | pos | 633.4490 | C34 H66 O8 N0 P1      |
| pos_891 | PMe(16:0/16:0) | pos | 663.4959 | C36 H72 O8 N0 P1      |
| pos_892 | PMe(16:0/16:1) | pos | 661.4803 | C36 H70 O8 N0 P1      |

---

---

|         |                |     |          |                   |
|---------|----------------|-----|----------|-------------------|
| pos_893 | PMe(16:0/17:0) | pos | 677.5116 | C37 H74 O8 N0 P1  |
| pos_894 | PMe(17:1/16:0) | pos | 675.4959 | C37 H72 O8 N0 P1  |
| pos_895 | PMe(18:0/16:0) | pos | 691.5272 | C38 H76 O8 N0 P1  |
| pos_896 | PMe(16:0/18:1) | pos | 689.5116 | C38 H74 O8 N0 P1  |
| pos_897 | PMe(16:0/18:2) | pos | 687.4959 | C38 H72 O8 N0 P1  |
| pos_899 | PMe(19:1/16:0) | pos | 703.5272 | C39 H76 O8 N0 P1  |
| pos_900 | PMe(20:0/16:0) | pos | 719.5585 | C40 H80 O8 N0 P1  |
| pos_901 | PMe(18:0/18:1) | pos | 717.5429 | C40 H78 O8 N0 P1  |
| pos_902 | PMe(16:0/20:1) | pos | 717.5429 | C40 H78 O8 N0 P1  |
| pos_903 | PMe(16:0/20:2) | pos | 715.5272 | C40 H76 O8 N0 P1  |
| pos_904 | PMe(16:0/20:5) | pos | 709.4803 | C40 H70 O8 N0 P1  |
| pos_905 | PMe(16:0/21:0) | pos | 733.5742 | C41 H82 O8 N0 P1  |
| pos_906 | PMe(16:0/22:0) | pos | 747.5898 | C42 H84 O8 N0 P1  |
| pos_907 | PMe(16:0/22:1) | pos | 745.5742 | C42 H82 O8 N0 P1  |
| pos_908 | PMe(16:0/22:2) | pos | 743.5585 | C42 H80 O8 N0 P1  |
| pos_909 | PMe(16:0/22:6) | pos | 735.4959 | C42 H72 O8 N0 P1  |
| pos_910 | PMe(16:0/24:1) | pos | 773.6055 | C44 H86 O8 N0 P1  |
| pos_911 | PS(18:0/18:1)  | pos | 790.5593 | C42 H81 O10 N1 P1 |
| pos_912 | PS(16:0/22:6)  | pos | 808.5123 | C44 H75 O10 N1 P1 |
| pos_913 | PS(16:1/22:6)  | pos | 806.4967 | C44 H73 O10 N1 P1 |
| pos_914 | PS(18:0/22:5)  | pos | 838.5593 | C46 H81 O10 N1 P1 |
| pos_915 | PS(18:0/22:6)  | pos | 836.5436 | C46 H79 O10 N1 P1 |
| pos_916 | PS(18:1/22:6)  | pos | 834.5280 | C46 H77 O10 N1 P1 |

---

# Supplementary Material

|         |                |     |          |                      |
|---------|----------------|-----|----------|----------------------|
| pos_917 | PS(22:5/22:6)  | pos | 882.5280 | C50 H77 O10 N1 P1    |
| pos_918 | PS(22:6/22:6)  | pos | 880.5123 | C50 H75 O10 N1 P1    |
| pos_919 | SM(d14:0/16:0) | pos | 649.5279 | C35 H74 O6 N2 P1     |
| pos_920 | SM(d18:1/12:0) | pos | 647.5123 | C35 H72 O6 N2 P1     |
| pos_921 | SM(d18:1/13:0) | pos | 661.5279 | C36 H74 O6 N2 P1     |
| pos_922 | SM(d14:0/18:0) | pos | 677.5592 | C37 H78 O6 N2 P1     |
| pos_923 | SM(d16:1/16:0) | pos | 697.5255 | C37 H75 O6 N2 P1 Na1 |
| pos_924 | SM(d14:0/18:1) | pos | 675.5436 | C37 H76 O6 N2 P1     |
| pos_925 | SM(d16:1/16:1) | pos | 673.5279 | C37 H74 O6 N2 P1     |
| pos_926 | SM(d14:0/18:4) | pos | 669.4966 | C37 H70 O6 N2 P1     |
| pos_927 | SM(d17:0/16:0) | pos | 691.5749 | C38 H80 O6 N2 P1     |
| pos_928 | SM(d17:1/16:0) | pos | 689.5592 | C38 H78 O6 N2 P1     |
| pos_930 | SM(d16:1/17:1) | pos | 687.5436 | C38 H76 O6 N2 P1     |
| pos_931 | SM(d18:2/15:1) | pos | 685.5279 | C38 H74 O6 N2 P1     |
| pos_932 | SM(d18:0/16:0) | pos | 705.5905 | C39 H82 O6 N2 P1     |
| pos_933 | SM(d18:1/16:0) | pos | 703.5749 | C39 H80 O6 N2 P1     |
| pos_934 | SM(d18:2/16:0) | pos | 701.5592 | C39 H78 O6 N2 P1     |
| pos_935 | SM(d16:1/18:2) | pos | 699.5436 | C39 H76 O6 N2 P1     |
| pos_936 | SM(d16:1/18:3) | pos | 697.5279 | C39 H74 O6 N2 P1     |
| pos_937 | SM(d17:0/18:1) | pos | 717.5905 | C40 H82 O6 N2 P1     |
| pos_938 | SM(d17:1/18:1) | pos | 715.5749 | C40 H80 O6 N2 P1     |
| pos_939 | SM(d18:2/17:1) | pos | 713.5592 | C40 H78 O6 N2 P1     |
| pos_940 | SM(d14:0/21:4) | pos | 711.5436 | C40 H76 O6 N2 P1     |

---

|         |                |     |          |                      |
|---------|----------------|-----|----------|----------------------|
| pos_941 | SM(d18:0/18:0) | pos | 733.6218 | C41 H86 O6 N2 P1     |
| pos_944 | SM(d18:2/18:1) | pos | 727.5749 | C41 H80 O6 N2 P1     |
| pos_945 | SM(d18:1/18:3) | pos | 725.5592 | C41 H78 O6 N2 P1     |
| pos_946 | SM(d18:2/18:3) | pos | 723.5436 | C41 H76 O6 N2 P1     |
| pos_947 | SM(d19:0/18:1) | pos | 745.6218 | C42 H86 O6 N2 P1     |
| pos_948 | SM(d19:1/18:1) | pos | 743.6062 | C42 H84 O6 N2 P1     |
| pos_949 | SM(d18:2/19:1) | pos | 741.5905 | C42 H82 O6 N2 P1     |
| pos_950 | SM(d14:0/23:4) | pos | 739.5749 | C42 H80 O6 N2 P1     |
| pos_951 | SM(d16:1/21:3) | pos | 739.5749 | C42 H80 O6 N2 P1     |
| pos_952 | SM(d14:0/23:6) | pos | 735.5436 | C42 H76 O6 N2 P1     |
| pos_953 | SM(d20:0/18:0) | pos | 761.6531 | C43 H90 O6 N2 P1     |
| pos_954 | SM(d20:0/18:1) | pos | 759.6375 | C43 H88 O6 N2 P1     |
| pos_955 | SM(d16:1/22:0) | pos | 781.6194 | C43 H87 O6 N2 P1 Na1 |
| pos_956 | SM(d20:1/18:1) | pos | 757.6218 | C43 H86 O6 N2 P1     |
| pos_957 | SM(d18:1/20:2) | pos | 755.6062 | C43 H84 O6 N2 P1     |
| pos_958 | SM(d16:1/22:2) | pos | 755.6062 | C43 H84 O6 N2 P1     |
| pos_959 | SM(d18:1/20:3) | pos | 753.5905 | C43 H82 O6 N2 P1     |
| pos_961 | SM(d18:2/20:5) | pos | 747.5436 | C43 H76 O6 N2 P1     |
| pos_962 | SM(d18:1/21:0) | pos | 773.6531 | C44 H90 O6 N2 P1     |
| pos_963 | SM(d18:0/21:2) | pos | 771.6375 | C44 H88 O6 N2 P1     |
| pos_964 | SM(d16:1/23:1) | pos | 771.6375 | C44 H88 O6 N2 P1     |
| pos_965 | SM(d18:1/21:2) | pos | 769.6218 | C44 H86 O6 N2 P1     |
| pos_966 | SM(d18:0/21:3) | pos | 769.6218 | C44 H86 O6 N2 P1     |

---

# Supplementary Material

|         |                |     |          |                      |
|---------|----------------|-----|----------|----------------------|
| pos_968 | SM(d18:1/21:5) | pos | 763.5749 | C44 H80 O6 N2 P1     |
| pos_970 | SM(d18:1/22:0) | pos | 787.6688 | C45 H92 O6 N2 P1     |
| pos_971 | SM(d16:1/24:1) | pos | 807.6350 | C45 H89 O6 N2 P1 Na1 |
| pos_972 | SM(d18:1/22:1) | pos | 785.6531 | C45 H90 O6 N2 P1     |
| pos_973 | SM(d18:1/22:2) | pos | 783.6375 | C45 H88 O6 N2 P1     |
| pos_974 | SM(d18:1/22:3) | pos | 781.6218 | C45 H86 O6 N2 P1     |
| pos_975 | SM(d16:1/24:3) | pos | 781.6218 | C45 H86 O6 N2 P1     |
| pos_977 | SM(d16:1/24:4) | pos | 779.6062 | C45 H84 O6 N2 P1     |
| pos_978 | SM(d18:1/22:5) | pos | 777.5905 | C45 H82 O6 N2 P1     |
| pos_979 | SM(d20:1/20:5) | pos | 777.5905 | C45 H82 O6 N2 P1     |
| pos_980 | SM(d18:1/22:6) | pos | 775.5749 | C45 H80 O6 N2 P1     |
| pos_982 | SM(d18:1/23:1) | pos | 799.6688 | C46 H92 O6 N2 P1     |
| pos_983 | SM(d18:1/23:2) | pos | 797.6531 | C46 H90 O6 N2 P1     |
| pos_984 | SM(d20:0/21:3) | pos | 797.6531 | C46 H90 O6 N2 P1     |
| pos_985 | SM(d18:1/23:3) | pos | 795.6375 | C46 H88 O6 N2 P1     |
| pos_986 | SM(d18:1/23:4) | pos | 793.6218 | C46 H86 O6 N2 P1     |
| pos_987 | SM(d18:1/23:5) | pos | 791.6062 | C46 H84 O6 N2 P1     |
| pos_988 | SM(d18:1/24:0) | pos | 815.7001 | C47 H96 O6 N2 P1     |
| pos_989 | SM(d18:1/24:1) | pos | 813.6844 | C47 H94 O6 N2 P1     |
| pos_990 | SM(d18:1/24:2) | pos | 811.6688 | C47 H92 O6 N2 P1     |
| pos_991 | SM(d18:1/24:3) | pos | 809.6531 | C47 H90 O6 N2 P1     |
| pos_992 | SM(d19:1/23:3) | pos | 809.6531 | C47 H90 O6 N2 P1     |
| pos_993 | SM(d18:2/24:3) | pos | 807.6375 | C47 H88 O6 N2 P1     |

---

|          |                |     |          |                      |
|----------|----------------|-----|----------|----------------------|
| pos_994  | SM(d18:1/24:5) | pos | 805.6218 | C47 H86 O6 N2 P1     |
| pos_995  | SM(d19:0/24:2) | pos | 827.7001 | C48 H96 O6 N2 P1     |
| pos_996  | SM(d19:0/24:3) | pos | 825.6844 | C48 H94 O6 N2 P1     |
| pos_997  | SM(d19:0/24:4) | pos | 823.6688 | C48 H92 O6 N2 P1     |
| pos_998  | SM(d19:0/24:5) | pos | 821.6531 | C48 H90 O6 N2 P1     |
| pos_999  | SM(d19:0/24:6) | pos | 819.6375 | C48 H88 O6 N2 P1     |
| pos_1000 | SM(d19:1/24:6) | pos | 817.6218 | C48 H86 O6 N2 P1     |
| pos_1001 | SM(d20:0/24:2) | pos | 841.7157 | C49 H98 O6 N2 P1     |
| pos_1002 | SM(d20:0/24:3) | pos | 839.7001 | C49 H96 O6 N2 P1     |
| pos_1004 | SM(d20:1/24:3) | pos | 837.6844 | C49 H94 O6 N2 P1     |
| pos_1005 | SM(d20:0/24:5) | pos | 835.6688 | C49 H92 O6 N2 P1     |
| pos_1006 | SM(d20:0/24:6) | pos | 833.6531 | C49 H90 O6 N2 P1     |
| pos_1007 | SM(t18:0/14:0) | pos | 693.5541 | C37 H78 O7 N2 P1     |
| pos_1008 | SM(t18:1/14:0) | pos | 691.5385 | C37 H76 O7 N2 P1     |
| pos_1009 | SM(t18:0/16:0) | pos | 721.5854 | C39 H82 O7 N2 P1     |
| pos_1010 | SM(t18:1/21:5) | pos | 779.5698 | C44 H80 O7 N2 P1     |
| pos_1011 | SM(t18:1/22:0) | pos | 803.6637 | C45 H92 O7 N2 P1     |
| pos_1012 | SM(t18:1/22:1) | pos | 801.6480 | C45 H90 O7 N2 P1     |
| pos_1013 | SM(t18:1/22:2) | pos | 799.6324 | C45 H88 O7 N2 P1     |
| pos_1014 | SM(t18:1/22:3) | pos | 797.6167 | C45 H86 O7 N2 P1     |
| pos_1015 | SM(t18:1/22:6) | pos | 797.5779 | C45 H79 O7 N2 P1 Li1 |
| pos_1016 | SM(t18:1/23:6) | pos | 805.5854 | C46 H82 O7 N2 P1     |
| pos_1017 | SM(t18:1/24:0) | pos | 831.6950 | C47 H96 O7 N2 P1     |

---

# Supplementary Material

|          |                    |     |          |                  |
|----------|--------------------|-----|----------|------------------|
| pos_1019 | SPH(d16:1)         | pos | 272.2584 | C16 H34 O2 N1    |
| pos_1020 | SPH(d18:1)         | pos | 300.2897 | C18 H38 O2 N1    |
| pos_1021 | SPH(d20:1)         | pos | 328.3210 | C20 H42 O2 N1    |
| pos_1022 | SPH(d22:1)         | pos | 356.3523 | C22 H46 O2 N1    |
| pos_1024 | SPH(t16:0)         | pos | 290.2690 | C16 H36 O3 N1    |
| pos_1025 | SPH(t20:0)         | pos | 346.3316 | C20 H44 O3 N1    |
| pos_1026 | SPHP(d18:0)        | pos | 364.2611 | C18 H39 O4 N1 P1 |
| pos_1027 | SPHP(d20:0)        | pos | 392.2924 | C20 H43 O4 N1 P1 |
| pos_1028 | StE(22:3)          | pos | 746.6810 | C51 H88 O2 N1    |
| pos_1029 | StE(22:4)          | pos | 744.6653 | C51 H86 O2 N1    |
| pos_1030 | StE(30:5)          | pos | 854.7749 | C59 H100 O2 N1   |
| pos_1031 | TG(4:0/6:0/12:4)   | pos | 457.2561 | C25 H38 O6 Na1   |
| pos_1032 | TG(6:0/9:0/10:1)   | pos | 598.4915 | C34 H66 O6 N2    |
| pos_1033 | TG(9:0/10:0/10:0)  | pos | 579.4021 | C32 H60 O6 K1    |
| pos_1035 | TG(6:0/13:0/13:0)  | pos | 621.4491 | C35 H66 O6 K1    |
| pos_1036 | TG(8:0/10:2/14:0)  | pos | 579.4619 | C35 H63 O6       |
| pos_1037 | TG(8:0/11:2/14:0)  | pos | 593.4776 | C36 H65 O6       |
| pos_1038 | TG(4:0/15:0/15:0)  | pos | 649.4804 | C37 H70 O6 K1    |
| pos_1040 | TG(16:1/6:0/12:2)  | pos | 605.4776 | C37 H65 O6       |
| pos_1041 | TG(14:1e/9:0/11:3) | pos | 589.4827 | C37 H65 O5       |
| pos_1042 | TG(12:0e/6:0/17:1) | pos | 626.5718 | C38 H76 O5 N1    |
| pos_1043 | TG(12:1e/6:0/17:0) | pos | 626.5718 | C38 H76 O5 N1    |
| pos_1044 | TG(16:0/8:0/11:2)  | pos | 621.5089 | C38 H69 O6       |



---

|          |                     |     |          |                |
|----------|---------------------|-----|----------|----------------|
| pos_1045 | TG(16:0/8:0/11:3)   | pos | 619.4932 | C38 H67 O6     |
| pos_1046 | TG(16:1/8:0/11:2)   | pos | 619.4932 | C38 H67 O6     |
| pos_1047 | TG(14:0/10:3/11:2)  | pos | 615.4619 | C38 H63 O6     |
| pos_1048 | TG(15:0/6:0/15:0)   | pos | 645.5640 | C39 H74 O6 Li1 |
| pos_1049 | TG(16:0/10:0/10:2)  | pos | 635.5245 | C39 H71 O6     |
| pos_1050 | TG(9:0/9:0/18:2)    | pos | 635.5245 | C39 H71 O6     |
| pos_1051 | TG(12:1e/6:0/18:1)  | pos | 621.5453 | C39 H73 O5     |
| pos_1052 | TG(16:1/10:0/10:2)  | pos | 633.5089 | C39 H69 O6     |
| pos_1053 | TG(18:3e/8:0/10:0)  | pos | 619.5296 | C39 H71 O5     |
| pos_1054 | TG(12:0e/6:0/18:3)  | pos | 619.5296 | C39 H71 O5     |
| pos_1055 | TG(14:0/10:1/12:4)  | pos | 651.4595 | C39 H64 O6 Na1 |
| pos_1056 | TG(14:0/11:3/11:3)  | pos | 627.4619 | C39 H63 O6     |
| pos_1057 | TG(10:0/10:0/17:1)  | pos | 689.5117 | C40 H74 O6 K1  |
| pos_1058 | TG(12:0e/10:1/15:0) | pos | 654.6031 | C40 H80 O5 N1  |
| pos_1059 | TG(16:0/10:0/11:2)  | pos | 649.5402 | C40 H73 O6     |
| pos_1060 | TG(18:0/8:0/11:2)   | pos | 649.5402 | C40 H73 O6     |
| pos_1061 | TG(14:1e/6:0/17:1)  | pos | 657.5428 | C40 H74 O5 Na1 |
| pos_1062 | TG(8:0/11:2/18:1)   | pos | 647.5245 | C40 H71 O6     |
| pos_1064 | TG(14:1e/11:3/12:3) | pos | 625.4827 | C40 H65 O5     |
| pos_1065 | TG(4:0/17:1/17:1)   | pos | 669.5640 | C41 H74 O6 Li1 |
| pos_1066 | TG(16:0/11:1/11:1)  | pos | 663.5558 | C41 H75 O6     |
| pos_1067 | TG(14:0/10:2/14:0)  | pos | 669.5640 | C41 H74 O6 Li1 |
| pos_1068 | TG(12:1e/8:0/18:1)  | pos | 649.5766 | C41 H77 O5     |

---

# Supplementary Material

|          |                     |     |          |                |
|----------|---------------------|-----|----------|----------------|
| pos_1069 | TG(18:1/10:1/10:1)  | pos | 661.5402 | C41 H73 O6     |
| pos_1070 | TG(12:1e/6:0/20:2)  | pos | 647.5609 | C41 H75 O5     |
| pos_1071 | TG(18:2e/10:1/10:1) | pos | 645.5453 | C41 H73 O5     |
| pos_1072 | TG(12:1e/10:4/16:0) | pos | 660.5562 | C41 H74 O5 N1  |
| pos_1073 | TG(12:0e/6:0/20:5)  | pos | 643.5296 | C41 H71 O5     |
| pos_1075 | TG(16:1/10:1/12:4)  | pos | 677.4752 | C41 H66 O6 Na1 |
| pos_1077 | TG(16:1/10:3/12:4)  | pos | 651.4619 | C41 H63 O6     |
| pos_1078 | TG(14:0/10:4/14:4)  | pos | 651.4619 | C41 H63 O6     |
| pos_1079 | TG(20:4e/8:0/10:4)  | pos | 637.4827 | C41 H65 O5     |
| pos_1080 | TG(15:0/6:0/18:1)   | pos | 717.5430 | C42 H78 O6 K1  |
| pos_1081 | TG(9:0/13:0/17:1)   | pos | 717.5430 | C42 H78 O6 K1  |
| pos_1082 | TG(16:1/9:0/14:0)   | pos | 794.7106 | C48 H94 O6 N2  |
| pos_1083 | TG(18:3/10:3/11:4)  | pos | 667.4544 | C42 H60 O6 Li1 |
| pos_1084 | TG(4:0/17:1/18:1)   | pos | 715.5273 | C42 H76 O6 K1  |
| pos_1085 | TG(20:1/8:0/11:2)   | pos | 675.5558 | C42 H75 O6     |
| pos_1086 | TG(6:0/13:0/20:4)   | pos | 711.4960 | C42 H72 O6 K1  |
| pos_1087 | TG(18:1/10:1/11:3)  | pos | 671.5245 | C42 H71 O6     |
| pos_1088 | TG(18:1/10:1/11:4)  | pos | 669.5089 | C42 H69 O6     |
| pos_1089 | TG(8:0/11:2/20:5)   | pos | 667.4932 | C42 H67 O6     |
| pos_1091 | TG(12:0/14:0/14:0)  | pos | 712.6450 | C43 H86 O6 N1  |
| pos_1092 | TG(16:1/10:0/14:0)  | pos | 710.6293 | C43 H84 O6 N1  |
| pos_1093 | TG(18:0/11:1/11:1)  | pos | 691.5871 | C43 H79 O6     |
| pos_1095 | TG(16:0/6:0/18:2)   | pos | 697.5953 | C43 H78 O6 Li1 |

---

|          |                    |     |          |                |
|----------|--------------------|-----|----------|----------------|
| pos_1096 | TG(18:1/11:1/11:1) | pos | 689.5715 | C43 H77 O6     |
| pos_1097 | TG(12:0e/6:0/22:4) | pos | 673.5766 | C43 H77 O5     |
| pos_1098 | TG(18:0/10:4/12:1) | pos | 685.5402 | C43 H73 O6     |
| pos_1099 | TG(12:0e/6:0/22:5) | pos | 671.5609 | C43 H75 O5     |
| pos_1100 | TG(12:0e/6:0/22:6) | pos | 669.5453 | C43 H73 O5     |
| pos_1101 | TG(16:1/10:3/14:4) | pos | 679.4932 | C43 H67 O6     |
| pos_1102 | TG(18:4/10:2/12:2) | pos | 679.4932 | C43 H67 O6     |
| pos_1104 | TG(9:0/14:0/18:1)  | pos | 822.7419 | C50 H98 O6 N2  |
| pos_1105 | TG(20:3/10:3/11:4) | pos | 695.4857 | C44 H64 O6 Li1 |
| pos_1106 | TG(20:4/10:4/11:3) | pos | 693.4701 | C44 H62 O6 Li1 |
| pos_1109 | TG(16:1/11:3/14:0) | pos | 816.6950 | C50 H92 O6 N2  |
| pos_1110 | TG(8:0/11:2/22:5)  | pos | 695.5245 | C44 H71 O6     |
| pos_1111 | TG(8:0/11:2/22:6)  | pos | 693.5089 | C44 H69 O6     |
| pos_1112 | TG(17:1/10:4/14:4) | pos | 691.4932 | C44 H67 O6     |
| pos_1113 | TG(14:0/14:0/14:0) | pos | 740.6763 | C45 H90 O6 N1  |
| pos_1114 | TG(16:0/10:0/16:0) | pos | 838.7732 | C51 H102 O6 N2 |
| pos_1115 | TG(10:0/14:0/18:1) | pos | 759.5899 | C45 H84 O6 K1  |
| pos_1116 | TG(16:1/12:0/14:0) | pos | 738.6606 | C45 H88 O6 N1  |
| pos_1117 | TG(16:1/12:0/14:1) | pos | 736.6450 | C45 H86 O6 N1  |
| pos_1119 | TG(20:4e/6:0/16:0) | pos | 701.6079 | C45 H81 O5     |
| pos_1120 | TG(18:0/10:3/14:2) | pos | 713.5715 | C45 H77 O6     |
| pos_1121 | TG(10:0/12:2/20:4) | pos | 711.5558 | C45 H75 O6     |
| pos_1122 | TG(12:1e/8:0/22:5) | pos | 697.5766 | C45 H77 O5     |

---

# Supplementary Material

|          |                     |     |          |                |
|----------|---------------------|-----|----------|----------------|
| pos_1123 | TG(12:1e/10:0/20:5) | pos | 697.5766 | C45 H77 O5     |
| pos_1124 | TG(14:0e/6:0/22:6)  | pos | 697.5766 | C45 H77 O5     |
| pos_1125 | TG(16:0/12:3/14:4)  | pos | 709.5402 | C45 H73 O6     |
| pos_1126 | TG(10:0/12:2/20:5)  | pos | 709.5402 | C45 H73 O6     |
| pos_1127 | TG(12:1e/8:0/22:6)  | pos | 695.5609 | C45 H75 O5     |
| pos_1128 | TG(10:0/10:2/22:6)  | pos | 707.5245 | C45 H71 O6     |
| pos_1129 | TG(15:0/14:0/14:0)  | pos | 754.6919 | C46 H92 O6 N1  |
| pos_1130 | TG(11:0/16:0/16:0)  | pos | 852.7889 | C52 H104 O6 N2 |
| pos_1131 | TG(9:0/10:0/24:1)   | pos | 773.6056 | C46 H86 O6 K1  |
| pos_1132 | TG(16:1/13:0/14:0)  | pos | 752.6763 | C46 H90 O6 N1  |
| pos_1133 | TG(16:0/11:1/16:0)  | pos | 850.7732 | C52 H102 O6 N2 |
| pos_1134 | TG(22:6/10:1/11:4)  | pos | 715.4932 | C46 H67 O6     |
| pos_1138 | TG(16:0/11:2/16:0)  | pos | 848.7576 | C52 H100 O6 N2 |
| pos_1139 | TG(15:0/10:2/18:1)  | pos | 769.5743 | C46 H82 O6 K1  |
| pos_1140 | TG(16:0/11:2/16:1)  | pos | 846.7419 | C52 H98 O6 N2  |
| pos_1141 | TG(16:1/11:2/16:1)  | pos | 844.7263 | C52 H96 O6 N2  |
| pos_1142 | TG(16:1/11:3/16:1)  | pos | 842.7106 | C52 H94 O6 N2  |
| pos_1143 | TG(12:1e/9:0/22:6)  | pos | 709.5766 | C46 H77 O5     |
| pos_1144 | TG(18:2/11:2/14:4)  | pos | 721.5402 | C46 H73 O6     |
| pos_1146 | TG(18:0/10:0/16:0)  | pos | 866.8045 | C53 H106 O6 N2 |
| pos_1147 | TG(16:1/14:0/14:0)  | pos | 771.6473 | C47 H88 O6 Na1 |
| pos_1148 | TG(16:0/10:0/18:1)  | pos | 864.7889 | C53 H104 O6 N2 |
| pos_1149 | TG(16:1/14:0/14:1)  | pos | 769.6317 | C47 H86 O6 Na1 |

---

|          |                     |     |          |                |
|----------|---------------------|-----|----------|----------------|
| pos_1150 | TG(16:1/10:0/18:1)  | pos | 862.7732 | C53 H102 O6 N2 |
| pos_1152 | TG(16:0/14:0/14:3)  | pos | 762.6606 | C47 H88 O6 N1  |
| pos_1153 | TG(16:1/14:0/14:3)  | pos | 760.6450 | C47 H86 O6 N1  |
| pos_1156 | TG(16:1/14:0/14:4)  | pos | 856.7263 | C53 H96 O6 N2  |
| pos_1157 | TG(16:0/10:4/18:2)  | pos | 854.7106 | C53 H94 O6 N2  |
| pos_1158 | TG(12:1e/10:4/22:1) | pos | 725.6079 | C47 H81 O5     |
| pos_1159 | TG(22:5/11:1/11:1)  | pos | 737.5715 | C47 H77 O6     |
| pos_1161 | TG(22:6/11:1/11:1)  | pos | 735.5558 | C47 H75 O6     |
| pos_1162 | TG(12:0e/10:2/22:6) | pos | 721.5766 | C47 H77 O5     |
| pos_1163 | TG(15:0/14:0/16:0)  | pos | 782.7232 | C48 H96 O6 N1  |
| pos_1164 | TG(15:0/14:0/16:1)  | pos | 780.7076 | C48 H94 O6 N1  |
| pos_1168 | TG(16:1/12:1/17:1)  | pos | 776.6763 | C48 H90 O6 N1  |
| pos_1170 | TG(16:0/11:2/18:1)  | pos | 874.7732 | C54 H102 O6 N2 |
| pos_1171 | TG(18:4/13:0/14:0)  | pos | 774.6606 | C48 H88 O6 N1  |
| pos_1172 | TG(15:0/14:3/16:1)  | pos | 774.6606 | C48 H88 O6 N1  |
| pos_1173 | TG(16:1/11:2/18:1)  | pos | 872.7576 | C54 H100 O6 N2 |
| pos_1175 | TG(16:1/9:0/20:4)   | pos | 870.7419 | C54 H98 O6 N2  |
| pos_1178 | TG(16:0e/14:0/16:0) | pos | 782.7596 | C49 H100 O5 N1 |
| pos_1179 | TG(16:0/14:0/16:1)  | pos | 799.6786 | C49 H92 O6 Na1 |
| pos_1180 | TG(16:1/14:0/16:1)  | pos | 797.6630 | C49 H90 O6 Na1 |
| pos_1181 | TG(16:0/12:1/18:1)  | pos | 890.8045 | C55 H106 O6 N2 |
| pos_1182 | TG(16:1/14:1/16:1)  | pos | 795.6473 | C49 H88 O6 Na1 |
| pos_1183 | TG(16:0/14:2/16:1)  | pos | 790.6919 | C49 H92 O6 N1  |

---

# Supplementary Material

|          |                    |     |          |                |
|----------|--------------------|-----|----------|----------------|
| pos_1184 | TG(16:1/12:0/18:3) | pos | 788.6763 | C49 H90 O6 N1  |
| pos_1185 | TG(16:0/14:3/16:1) | pos | 788.6763 | C49 H90 O6 N1  |
| pos_1187 | TG(12:0/14:0/20:5) | pos | 791.6160 | C49 H84 O6 Na1 |
| pos_1189 | TG(16:1/10:0/20:5) | pos | 789.6004 | C49 H82 O6 Na1 |
| pos_1191 | TG(16:1/12:4/18:1) | pos | 882.7419 | C55 H98 O6 N2  |
| pos_1192 | TG(18:0/10:4/18:3) | pos | 765.6028 | C49 H81 O6     |
| pos_1193 | TG(16:1/8:0/22:6)  | pos | 782.6293 | C49 H84 O6 N1  |
| pos_1198 | TG(16:0/14:0/17:1) | pos | 813.6943 | C50 H94 O6 Na1 |
| pos_1199 | TG(15:0/16:1/16:1) | pos | 806.7232 | C50 H96 O6 N1  |
| pos_1200 | TG(16:1/14:0/17:1) | pos | 811.6786 | C50 H92 O6 Na1 |
| pos_1201 | TG(11:0/18:1/18:1) | pos | 904.8202 | C56 H108 O6 N2 |
| pos_1202 | TG(16:1/14:1/17:1) | pos | 804.7076 | C50 H94 O6 N1  |
| pos_1203 | TG(11:0/16:0/20:3) | pos | 902.8045 | C56 H106 O6 N2 |
| pos_1204 | TG(16:1/13:0/18:3) | pos | 802.6919 | C50 H92 O6 N1  |
| pos_1206 | TG(18:4/13:0/16:1) | pos | 800.6763 | C50 H90 O6 N1  |
| pos_1207 | TG(14:0/13:0/20:5) | pos | 800.6763 | C50 H90 O6 N1  |
| pos_1208 | TG(9:0/18:1/20:4)  | pos | 898.7732 | C56 H102 O6 N2 |
| pos_1209 | TG(18:1/11:3/18:1) | pos | 898.7732 | C56 H102 O6 N2 |
| pos_1210 | TG(16:0/11:3/20:2) | pos | 789.6579 | C50 H86 O6 Li1 |
| pos_1211 | TG(11:0/14:0/22:6) | pos | 798.6606 | C50 H88 O6 N1  |
| pos_1212 | TG(16:1/9:0/22:5)  | pos | 896.7576 | C56 H100 O6 N2 |
| pos_1213 | TG(16:1/11:1/20:4) | pos | 896.7576 | C56 H100 O6 N2 |
| pos_1214 | TG(18:2/11:3/18:2) | pos | 894.7419 | C56 H98 O6 N2  |

---

|          |                     |     |          |                |
|----------|---------------------|-----|----------|----------------|
| pos_1215 | TG(18:3/11:2/18:3)  | pos | 892.7263 | C56 H96 O6 N2  |
| pos_1216 | TG(18:0/14:0/16:0)  | pos | 824.7702 | C51 H102 O6 N1 |
| pos_1217 | TG(16:0/16:0/16:0)  | pos | 824.7702 | C51 H102 O6 N1 |
| pos_1218 | TG(18:0e/14:0/16:0) | pos | 810.7909 | C51 H104 O5 N1 |
| pos_1220 | TG(16:0/16:0/16:1)  | pos | 827.7099 | C51 H96 O6 Na1 |
| pos_1221 | TG(16:1e/16:0/16:0) | pos | 808.7753 | C51 H102 O5 N1 |
| pos_1222 | TG(16:1/14:0/18:1)  | pos | 825.6943 | C51 H94 O6 Na1 |
| pos_1224 | TG(16:0e/16:1/16:1) | pos | 806.7596 | C51 H100 O5 N1 |
| pos_1226 | TG(16:1/16:1/16:1)  | pos | 823.6786 | C51 H92 O6 Na1 |
| pos_1227 | TG(16:0/14:0/18:3)  | pos | 823.6786 | C51 H92 O6 Na1 |
| pos_1229 | TG(16:1/14:0/18:3)  | pos | 821.6630 | C51 H90 O6 Na1 |
| pos_1230 | TG(18:4/14:0/16:0)  | pos | 821.6630 | C51 H90 O6 Na1 |
| pos_1231 | TG(18:4/14:0/16:1)  | pos | 819.6473 | C51 H88 O6 Na1 |
| pos_1232 | TG(14:0/14:0/20:5)  | pos | 819.6473 | C51 H88 O6 Na1 |
| pos_1233 | TG(16:1/14:3/18:1)  | pos | 912.7889 | C57 H104 O6 N2 |
| pos_1234 | TG(16:0/14:4/18:1)  | pos | 912.7889 | C57 H104 O6 N2 |
| pos_1235 | TG(16:1/12:0/20:5)  | pos | 817.6317 | C51 H86 O6 Na1 |
| pos_1236 | TG(12:0/14:0/22:6)  | pos | 817.6317 | C51 H86 O6 Na1 |
| pos_1237 | TG(18:4/14:1/16:1)  | pos | 795.6497 | C51 H87 O6     |
| pos_1238 | TG(16:0/10:0/22:6)  | pos | 910.7732 | C57 H102 O6 N2 |
| pos_1239 | TG(16:1/10:0/22:6)  | pos | 810.6606 | C51 H88 O6 N1  |
| pos_1240 | TG(16:0/10:1/22:6)  | pos | 810.6606 | C51 H88 O6 N1  |
| pos_1242 | TG(14:0/14:3/20:5)  | pos | 808.6450 | C51 H86 O6 N1  |

---

# Supplementary Material

|          |                     |     |          |                |
|----------|---------------------|-----|----------|----------------|
| pos_1243 | TG(16:0/10:2/22:6)  | pos | 808.6450 | C51 H86 O6 N1  |
| pos_1244 | TG(18:4/14:3/16:1)  | pos | 791.6184 | C51 H83 O6     |
| pos_1245 | TG(15:0/11:2/22:6)  | pos | 906.7419 | C57 H98 O6 N2  |
| pos_1246 | TG(16:0/16:0/17:0)  | pos | 838.7858 | C52 H104 O6 N1 |
| pos_1247 | TG(18:0/15:0/16:0)  | pos | 838.7858 | C52 H104 O6 N1 |
| pos_1248 | TG(16:0/16:1/17:0)  | pos | 836.7702 | C52 H102 O6 N1 |
| pos_1249 | TG(15:0/16:0/18:1)  | pos | 841.7256 | C52 H98 O6 Na1 |
| pos_1251 | TG(16:1e/16:0/17:0) | pos | 822.7909 | C52 H104 O5 N1 |
| pos_1252 | TG(16:0/16:1/17:1)  | pos | 839.7099 | C52 H96 O6 Na1 |
| pos_1254 | TG(16:1/16:1/17:1)  | pos | 837.6943 | C52 H94 O6 Na1 |
| pos_1255 | TG(18:1/13:0/18:2)  | pos | 930.8358 | C58 H110 O6 N2 |
| pos_1256 | TG(15:0/16:1/18:3)  | pos | 830.7232 | C52 H96 O6 N1  |
| pos_1257 | TG(15:0/14:0/20:4)  | pos | 830.7232 | C52 H96 O6 N1  |
| pos_1258 | TG(11:0/16:0/22:4)  | pos | 928.8202 | C58 H108 O6 N2 |
| pos_1259 | TG(18:1/11:1/20:2)  | pos | 928.8202 | C58 H108 O6 N2 |
| pos_1261 | TG(15:0/14:0/20:5)  | pos | 833.6630 | C52 H90 O6 Na1 |
| pos_1263 | TG(11:0/18:1/20:4)  | pos | 926.8045 | C58 H106 O6 N2 |
| pos_1264 | TG(16:1/13:0/20:5)  | pos | 826.6919 | C52 H92 O6 N1  |
| pos_1265 | TG(14:0/13:0/22:6)  | pos | 826.6919 | C52 H92 O6 N1  |
| pos_1267 | TG(11:0/18:1/20:5)  | pos | 815.6735 | C52 H88 O6 Li1 |
| pos_1268 | TG(11:0/16:1/22:6)  | pos | 824.6763 | C52 H90 O6 N1  |
| pos_1269 | TG(18:1/11:2/20:4)  | pos | 922.7732 | C58 H102 O6 N2 |
| pos_1270 | TG(15:0/12:2/22:6)  | pos | 822.6606 | C52 H88 O6 N1  |



---

|          |                     |     |          |                |
|----------|---------------------|-----|----------|----------------|
| pos_1271 | TG(16:1/11:2/22:5)  | pos | 920.7576 | C58 H100 O6 N2 |
| pos_1274 | TG(16:0/16:0/18:1)  | pos | 850.7858 | C53 H104 O6 N1 |
| pos_1276 | TG(18:1/10:3/22:6)  | pos | 930.7419 | C59 H98 O6 N2  |
| pos_1277 | TG(16:1/14:4/20:5)  | pos | 930.7419 | C59 H98 O6 N2  |
| pos_1278 | TG(16:0e/16:0/18:1) | pos | 819.7800 | C53 H103 O5    |
| pos_1280 | TG(16:0e/16:1/18:1) | pos | 834.7909 | C53 H104 O5 N1 |
| pos_1281 | TG(16:1e/16:0/18:1) | pos | 834.7909 | C53 H104 O5 N1 |
| pos_1282 | TG(18:1e/16:0/16:1) | pos | 834.7909 | C53 H104 O5 N1 |
| pos_1284 | TG(16:0/14:0/20:3)  | pos | 829.7280 | C53 H97 O6     |
| pos_1285 | TG(16:1/16:1/18:1)  | pos | 851.7099 | C53 H96 O6 Na1 |
| pos_1287 | TG(16:1e/16:1/18:1) | pos | 832.7753 | C53 H102 O5 N1 |
| pos_1288 | TG(16:0/14:0/20:4)  | pos | 849.6943 | C53 H94 O6 Na1 |
| pos_1289 | TG(16:0/16:1/18:3)  | pos | 827.7123 | C53 H95 O6     |
| pos_1290 | TG(18:1/14:2/18:1)  | pos | 942.8358 | C59 H110 O6 N2 |
| pos_1291 | TG(16:0/12:0/22:4)  | pos | 942.8358 | C59 H110 O6 N2 |
| pos_1292 | TG(16:1/14:0/20:4)  | pos | 847.6786 | C53 H92 O6 Na1 |
| pos_1294 | TG(18:4/16:0/16:1)  | pos | 825.6967 | C53 H93 O6     |
| pos_1296 | TG(18:4/16:1/16:1)  | pos | 845.6630 | C53 H90 O6 Na1 |
| pos_1297 | TG(16:1/14:0/20:5)  | pos | 845.6630 | C53 H90 O6 Na1 |
| pos_1298 | TG(16:1/14:1/20:5)  | pos | 843.6473 | C53 H88 O6 Na1 |
| pos_1299 | TG(16:1/12:0/22:6)  | pos | 843.6473 | C53 H88 O6 Na1 |
| pos_1300 | TG(14:0/14:1/22:6)  | pos | 838.6919 | C53 H92 O6 N1  |
| pos_1301 | TG(10:0/18:1/22:6)  | pos | 936.7889 | C59 H104 O6 N2 |

---

# Supplementary Material

|          |                    |     |          |                 |
|----------|--------------------|-----|----------|-----------------|
| pos_1302 | TG(12:0/18:3/20:5) | pos | 836.6763 | C53 H90 O6 N1   |
| pos_1303 | TG(16:0/14:3/20:5) | pos | 836.6763 | C53 H90 O6 N1   |
| pos_1306 | TG(16:0/12:3/22:6) | pos | 932.7576 | C59 H100 O6 N2  |
| pos_1308 | TG(18:0/16:0/17:0) | pos | 866.8171 | C54 H108 O6 N1  |
| pos_1309 | TG(16:0/17:0/18:1) | pos | 864.8015 | C54 H106 O6 N1  |
| pos_1310 | TG(16:0/11:1/24:0) | pos | 962.8984 | C60 H118 O6 N2  |
| pos_1313 | TG(16:0/17:1/18:1) | pos | 867.7412 | C54 H100 O6 Na1 |
| pos_1315 | TG(16:1/17:1/18:1) | pos | 865.7256 | C54 H98 O6 Na1  |
| pos_1316 | TG(18:1/11:1/22:1) | pos | 958.8671 | C60 H114 O6 N2  |
| pos_1317 | TG(15:0/16:0/20:4) | pos | 841.7280 | C54 H97 O6      |
| pos_1318 | TG(16:0/13:0/22:4) | pos | 956.8515 | C60 H112 O6 N2  |
| pos_1319 | TG(16:1/17:1/18:3) | pos | 845.7205 | C54 H94 O6 Li1  |
| pos_1320 | TG(15:0/14:0/22:5) | pos | 839.7123 | C54 H95 O6      |
| pos_1321 | TG(15:0/16:0/20:5) | pos | 861.6943 | C54 H94 O6 Na1  |
| pos_1322 | TG(18:1/13:0/20:4) | pos | 954.8358 | C60 H110 O6 N2  |
| pos_1324 | TG(14:0/17:1/20:5) | pos | 859.6786 | C54 H92 O6 Na1  |
| pos_1325 | TG(15:0/14:0/22:6) | pos | 859.6786 | C54 H92 O6 Na1  |
| pos_1326 | TG(11:0/18:1/22:5) | pos | 952.8202 | C60 H108 O6 N2  |
| pos_1328 | TG(20:5/14:1/17:1) | pos | 852.7076 | C54 H94 O6 N1   |
| pos_1329 | TG(18:0/11:1/22:6) | pos | 950.8045 | C60 H106 O6 N2  |
| pos_1330 | TG(20:5/14:2/17:1) | pos | 850.6919 | C54 H92 O6 N1   |
| pos_1331 | TG(18:3/13:0/20:5) | pos | 850.6919 | C54 H92 O6 N1   |
| pos_1333 | TG(18:0/16:0/18:0) | pos | 880.8328 | C55 H110 O6 N1  |

---

|          |                     |     |          |                 |
|----------|---------------------|-----|----------|-----------------|
| pos_1334 | TG(18:0e/16:0/18:0) | pos | 866.8535 | C55 H112 O5 N1  |
| pos_1336 | TG(18:4/14:1/20:5)  | pos | 865.6317 | C55 H86 O6 Na1  |
| pos_1337 | TG(16:0/14:4/22:6)  | pos | 860.6763 | C55 H90 O6 N1   |
| pos_1339 | TG(18:0e/16:0/18:1) | pos | 847.8113 | C55 H107 O5     |
| pos_1340 | TG(16:0/18:1/18:1)  | pos | 876.8015 | C55 H106 O6 N1  |
| pos_1342 | TG(16:0e/18:1/18:1) | pos | 845.7957 | C55 H105 O5     |
| pos_1343 | TG(18:1e/16:0/18:1) | pos | 862.8222 | C55 H108 O5 N1  |
| pos_1344 | TG(16:0/14:0/22:3)  | pos | 857.7593 | C55 H101 O6     |
| pos_1345 | TG(16:1/18:1/18:1)  | pos | 879.7412 | C55 H100 O6 Na1 |
| pos_1346 | TG(18:1e/16:1/18:1) | pos | 860.8066 | C55 H106 O5 N1  |
| pos_1348 | TG(16:1e/18:1/18:1) | pos | 860.8066 | C55 H106 O5 N1  |
| pos_1349 | TG(16:1/18:1/18:2)  | pos | 855.7436 | C55 H99 O6      |
| pos_1350 | TG(16:0/16:0/20:4)  | pos | 877.7256 | C55 H98 O6 Na1  |
| pos_1351 | TG(16:0/18:1/18:3)  | pos | 855.7436 | C55 H99 O6      |
| pos_1352 | TG(16:0e/16:0/20:4) | pos | 858.7909 | C55 H104 O5 N1  |
| pos_1353 | TG(16:0/16:1/20:4)  | pos | 875.7099 | C55 H96 O6 Na1  |
| pos_1354 | TG(16:0/16:0/20:5)  | pos | 875.7099 | C55 H96 O6 Na1  |
| pos_1355 | TG(16:0e/14:0/22:5) | pos | 856.7753 | C55 H102 O5 N1  |
| pos_1358 | TG(16:1/14:0/22:5)  | pos | 868.7389 | C55 H98 O6 N1   |
| pos_1359 | TG(16:1/16:1/20:4)  | pos | 873.6943 | C55 H94 O6 Na1  |
| pos_1362 | TG(16:1/14:1/22:6)  | pos | 869.6630 | C55 H90 O6 Na1  |
| pos_1365 | TG(18:4/16:1/18:4)  | pos | 862.6919 | C55 H92 O6 N1   |
| pos_1367 | TG(18:0/17:0/18:0)  | pos | 894.8484 | C56 H112 O6 N1  |

---

# Supplementary Material

|          |                    |     |          |                 |
|----------|--------------------|-----|----------|-----------------|
| pos_1368 | TG(18:0/16:0/19:0) | pos | 894.8484 | C56 H112 O6 N1  |
| pos_1369 | TG(16:0/18:1/19:0) | pos | 881.8144 | C56 H106 O6 Li1 |
| pos_1370 | TG(18:0/17:0/18:1) | pos | 892.8328 | C56 H110 O6 N1  |
| pos_1371 | TG(20:5/13:0/20:5) | pos | 879.6473 | C56 H88 O6 Na1  |
| pos_1374 | TG(20:4/11:2/22:6) | pos | 968.7576 | C62 H100 O6 N2  |
| pos_1375 | TG(20:5/11:3/22:5) | pos | 966.7419 | C62 H98 O6 N2   |
| pos_1377 | TG(17:0/18:1/18:1) | pos | 890.8171 | C56 H108 O6 N1  |
| pos_1381 | TG(18:1/17:1/18:3) | pos | 873.7518 | C56 H98 O6 Li1  |
| pos_1383 | TG(18:2/17:1/18:2) | pos | 873.7518 | C56 H98 O6 Li1  |
| pos_1384 | TG(18:1/13:0/22:4) | pos | 982.8671 | C62 H114 O6 N2  |
| pos_1385 | TG(18:4/17:1/18:1) | pos | 871.7361 | C56 H96 O6 Li1  |
| pos_1386 | TG(16:1/17:0/20:5) | pos | 871.7361 | C56 H96 O6 Li1  |
| pos_1388 | TG(14:0/17:1/22:5) | pos | 882.7545 | C56 H100 O6 N1  |
| pos_1389 | TG(16:0/17:1/20:5) | pos | 887.7099 | C56 H96 O6 Na1  |
| pos_1390 | TG(15:0/16:0/22:6) | pos | 887.7099 | C56 H96 O6 Na1  |
| pos_1391 | TG(18:1/13:0/22:5) | pos | 980.8515 | C62 H112 O6 N2  |
| pos_1392 | TG(16:1/17:1/20:5) | pos | 869.7205 | C56 H94 O6 Li1  |
| pos_1393 | TG(14:0/17:1/22:6) | pos | 885.6943 | C56 H94 O6 Na1  |
| pos_1394 | TG(18:4/17:1/18:3) | pos | 878.7232 | C56 H96 O6 N1   |
| pos_1395 | TG(22:6/14:1/17:1) | pos | 878.7232 | C56 H96 O6 N1   |
| pos_1396 | TG(18:4/15:0/20:5) | pos | 881.6630 | C56 H90 O6 Na1  |
| pos_1398 | TG(11:0/20:4/22:5) | pos | 974.8045 | C62 H106 O6 N2  |
| pos_1399 | TG(18:0/16:0/20:0) | pos | 913.8195 | C57 H110 O6 Na1 |

---

|          |                     |     |          |                 |
|----------|---------------------|-----|----------|-----------------|
| pos_1401 | TG(18:0/18:0/18:1)  | pos | 906.8484 | C57 H112 O6 N1  |
| pos_1402 | TG(18:0/16:0/20:1)  | pos | 906.8484 | C57 H112 O6 N1  |
| pos_1404 | TG(18:4/14:0/22:6)  | pos | 893.6630 | C57 H90 O6 Na1  |
| pos_1405 | TG(12:0/20:5/22:6)  | pos | 891.6473 | C57 H88 O6 Na1  |
| pos_1407 | TG(10:0/22:6/22:6)  | pos | 889.6317 | C57 H86 O6 Na1  |
| pos_1409 | TG(20:5/12:2/22:6)  | pos | 865.6341 | C57 H85 O6      |
| pos_1410 | TG(18:0e/18:0/18:1) | pos | 875.8426 | C57 H111 O5     |
| pos_1411 | TG(16:0/18:1/20:1)  | pos | 887.8062 | C57 H107 O6     |
| pos_1412 | TG(16:0e/18:1/20:1) | pos | 890.8535 | C57 H112 O5 N1  |
| pos_1413 | TG(18:1e/18:0/18:1) | pos | 890.8535 | C57 H112 O5 N1  |
| pos_1414 | TG(18:1/18:1/18:1)  | pos | 907.7725 | C57 H104 O6 Na1 |
| pos_1415 | TG(18:1e/18:1/18:1) | pos | 888.8379 | C57 H110 O5 N1  |
| pos_1417 | TG(16:0/16:0/22:4)  | pos | 921.7308 | C57 H102 O6 K1  |
| pos_1419 | TG(16:0/18:1/20:4)  | pos | 903.7412 | C57 H100 O6 Na1 |
| pos_1420 | TG(16:0/16:1/22:4)  | pos | 887.7674 | C57 H100 O6 Li1 |
| pos_1422 | TG(18:0/16:0/20:5)  | pos | 903.7412 | C57 H100 O6 Na1 |
| pos_1423 | TG(16:0/16:0/22:5)  | pos | 898.7858 | C57 H104 O6 N1  |
| pos_1424 | TG(16:0e/16:0/22:5) | pos | 884.8066 | C57 H106 O5 N1  |
| pos_1426 | TG(16:0/16:0/22:6)  | pos | 896.7702 | C57 H102 O6 N1  |
| pos_1428 | TG(16:0/16:1/22:5)  | pos | 879.7436 | C57 H99 O6      |
| pos_1429 | TG(16:1/18:1/20:4)  | pos | 901.7256 | C57 H98 O6 Na1  |
| pos_1432 | TG(16:0/18:3/20:4)  | pos | 883.7361 | C57 H96 O6 Li1  |
| pos_1433 | TG(16:1/16:1/22:5)  | pos | 877.7280 | C57 H97 O6      |

---

# Supplementary Material

|          |                     |     |           |                 |
|----------|---------------------|-----|-----------|-----------------|
| pos_1435 | TG(16:1/18:2/20:5)  | pos | 875.7123  | C57 H95 O6      |
| pos_1437 | TG(16:1/18:3/20:5)  | pos | 895.6786  | C57 H92 O6 Na1  |
| pos_1438 | TG(14:0/20:4/20:5)  | pos | 879.7048  | C57 H92 O6 Li1  |
| pos_1439 | TG(16:2e/16:1/22:6) | pos | 876.7440  | C57 H98 O5 N1   |
| pos_1440 | TG(18:0/16:0/21:0)  | pos | 922.8797  | C58 H116 O6 N1  |
| pos_1441 | TG(18:0/18:0/19:0)  | pos | 922.8797  | C58 H116 O6 N1  |
| pos_1442 | TG(16:0/16:0/23:0)  | pos | 922.8797  | C58 H116 O6 N1  |
| pos_1443 | TG(20:0/17:0/18:1)  | pos | 920.8641  | C58 H114 O6 N1  |
| pos_1444 | TG(16:0/18:1/21:0)  | pos | 925.8195  | C58 H110 O6 Na1 |
| pos_1445 | TG(18:0/16:0/21:1)  | pos | 920.8641  | C58 H114 O6 N1  |
| pos_1447 | TG(18:4/15:0/22:6)  | pos | 891.7048  | C58 H92 O6 Li1  |
| pos_1449 | TG(22:4/11:2/22:4)  | pos | 1000.8202 | C64 H108 O6 N2  |
| pos_1450 | TG(20:5/13:0/22:6)  | pos | 889.6892  | C58 H90 O6 Li1  |
| pos_1452 | TG(19:0/18:1/18:1)  | pos | 918.8484  | C58 H112 O6 N1  |
| pos_1453 | TG(17:0/18:1/20:1)  | pos | 918.8484  | C58 H112 O6 N1  |
| pos_1454 | TG(19:1/18:0/18:1)  | pos | 918.8484  | C58 H112 O6 N1  |
| pos_1457 | TG(19:1/18:1/18:1)  | pos | 921.7882  | C58 H106 O6 Na1 |
| pos_1458 | TG(16:0/17:0/22:4)  | pos | 914.8171  | C58 H108 O6 N1  |
| pos_1459 | TG(16:0/17:0/22:5)  | pos | 912.8015  | C58 H106 O6 N1  |
| pos_1460 | TG(19:1/18:2/18:2)  | pos | 901.7831  | C58 H102 O6 Li1 |
| pos_1461 | TG(17:0/18:1/20:4)  | pos | 895.7749  | C58 H103 O6     |
| pos_1462 | TG(16:1/17:1/22:4)  | pos | 910.7858  | C58 H104 O6 N1  |
| pos_1463 | TG(16:0/17:1/22:5)  | pos | 910.7858  | C58 H104 O6 N1  |

---

|          |                     |     |           |                 |
|----------|---------------------|-----|-----------|-----------------|
| pos_1464 | TG(16:0/17:0/22:6)  | pos | 893.7593  | C58 H101 O6     |
| pos_1465 | TG(16:0/17:1/22:6)  | pos | 891.7436  | C58 H99 O6      |
| pos_1466 | TG(19:1/14:0/22:6)  | pos | 897.7518  | C58 H98 O6 Li1  |
| pos_1467 | TG(16:1/17:1/22:5)  | pos | 908.7702  | C58 H102 O6 N1  |
| pos_1469 | TG(16:1/17:1/22:6)  | pos | 895.7361  | C58 H96 O6 Li1  |
| pos_1470 | TG(18:3/17:1/20:4)  | pos | 889.7280  | C58 H97 O6      |
| pos_1471 | TG(18:3/17:1/20:5)  | pos | 904.7389  | C58 H98 O6 N1   |
| pos_1472 | TG(15:0/18:3/22:6)  | pos | 909.6943  | C58 H94 O6 Na1  |
| pos_1473 | TG(11:0/22:4/22:5)  | pos | 1002.8358 | C64 H110 O6 N2  |
| pos_1474 | TG(16:0/16:0/24:0)  | pos | 936.8954  | C59 H118 O6 N1  |
| pos_1476 | TG(18:0/16:0/22:1)  | pos | 923.8613  | C59 H112 O6 Li1 |
| pos_1477 | TG(16:0/16:1/24:0)  | pos | 939.8351  | C59 H112 O6 Na1 |
| pos_1478 | TG(16:0/16:0/24:1)  | pos | 934.8797  | C59 H116 O6 N1  |
| pos_1479 | TG(16:0/20:5/20:5)  | pos | 899.7123  | C59 H95 O6      |
| pos_1482 | TG(14:0/20:4/22:6)  | pos | 899.7123  | C59 H95 O6      |
| pos_1483 | TG(18:3e/16:1/22:6) | pos | 902.7596  | C59 H100 O5 N1  |
| pos_1484 | TG(18:4/16:1/22:6)  | pos | 903.7048  | C59 H92 O6 Li1  |
| pos_1486 | TG(14:0/20:5/22:6)  | pos | 919.6786  | C59 H92 O6 Na1  |
| pos_1487 | TG(20:5/14:1/22:6)  | pos | 917.6630  | C59 H90 O6 Na1  |
| pos_1488 | TG(12:0/22:6/22:6)  | pos | 917.6630  | C59 H90 O6 Na1  |
| pos_1491 | TG(20:5/14:3/22:6)  | pos | 908.6763  | C59 H90 O6 N1   |
| pos_1492 | TG(22:5/12:3/22:6)  | pos | 891.6497  | C59 H87 O6      |
| pos_1494 | TG(22:6/12:4/22:6)  | pos | 887.6184  | C59 H83 O6      |

---

# Supplementary Material

|          |                     |     |          |                 |
|----------|---------------------|-----|----------|-----------------|
| pos_1495 | TG(18:0e/16:0/22:1) | pos | 903.8739 | C59 H115 O5     |
| pos_1496 | TG(20:0/18:1/18:1)  | pos | 932.8641 | C59 H114 O6 N1  |
| pos_1497 | TG(16:0/18:1/22:1)  | pos | 915.8375 | C59 H111 O6     |
| pos_1498 | TG(16:0/16:1/24:1)  | pos | 932.8641 | C59 H114 O6 N1  |
| pos_1499 | TG(16:0e/18:1/22:1) | pos | 918.8848 | C59 H116 O5 N1  |
| pos_1500 | TG(20:1/18:1/18:1)  | pos | 935.8038 | C59 H108 O6 Na1 |
| pos_1503 | TG(18:0/16:0/22:4)  | pos | 911.8062 | C59 H107 O6     |
| pos_1504 | TG(18:0e/16:0/22:4) | pos | 914.8535 | C59 H112 O5 N1  |
| pos_1505 | TG(16:1/18:1/22:3)  | pos | 947.7464 | C59 H104 O6 K1  |
| pos_1506 | TG(16:0/18:1/22:4)  | pos | 909.7906 | C59 H105 O6     |
| pos_1507 | TG(18:0/16:0/22:5)  | pos | 926.8171 | C59 H108 O6 N1  |
| pos_1508 | TG(18:0e/16:0/22:5) | pos | 912.8379 | C59 H110 O5 N1  |
| pos_1509 | TG(16:0/18:1/22:5)  | pos | 907.7749 | C59 H103 O6     |
| pos_1510 | TG(18:0/16:0/22:6)  | pos | 929.7569 | C59 H102 O6 Na1 |
| pos_1512 | TG(18:0e/16:0/22:6) | pos | 910.8222 | C59 H108 O5 N1  |
| pos_1515 | TG(18:1/18:1/20:5)  | pos | 927.7412 | C59 H100 O6 Na1 |
| pos_1518 | TG(18:1/18:2/20:5)  | pos | 920.7702 | C59 H102 O6 N1  |
| pos_1519 | TG(16:1/20:4/20:4)  | pos | 901.7280 | C59 H97 O6      |
| pos_1520 | TG(16:0/20:4/20:5)  | pos | 923.7099 | C59 H96 O6 Na1  |
| pos_1522 | TG(20:5/18:2/18:2)  | pos | 923.7099 | C59 H96 O6 Na1  |
| pos_1523 | TG(18:3/18:2/20:4)  | pos | 918.7545 | C59 H100 O6 N1  |
| pos_1524 | TG(18:0/19:0/20:0)  | pos | 950.9110 | C60 H120 O6 N1  |
| pos_1525 | TG(18:0/16:0/23:0)  | pos | 950.9110 | C60 H120 O6 N1  |



---

|          |                     |     |           |                 |
|----------|---------------------|-----|-----------|-----------------|
| pos_1526 | TG(16:0/17:0/24:1)  | pos | 948.8954  | C60 H118 O6 N1  |
| pos_1527 | TG(16:0/18:1/23:0)  | pos | 953.8508  | C60 H114 O6 Na1 |
| pos_1529 | TG(15:0/20:4/22:6)  | pos | 935.7099  | C60 H96 O6 Na1  |
| pos_1530 | TG(20:5/17:1/20:5)  | pos | 928.7389  | C60 H98 O6 N1   |
| pos_1531 | TG(18:4/17:1/22:6)  | pos | 933.6943  | C60 H94 O6 Na1  |
| pos_1534 | TG(16:0e/18:1/23:0) | pos | 934.9161  | C60 H120 O5 N1  |
| pos_1535 | TG(16:0/18:1/23:1)  | pos | 951.8351  | C60 H112 O6 Na1 |
| pos_1536 | TG(18:1/17:1/22:1)  | pos | 944.8641  | C60 H114 O6 N1  |
| pos_1537 | TG(24:1/11:1/22:1)  | pos | 1042.9610 | C66 H126 O6 N2  |
| pos_1539 | TG(16:0/19:0/22:4)  | pos | 942.8484  | C60 H112 O6 N1  |
| pos_1540 | TG(17:0/18:1/22:4)  | pos | 940.8328  | C60 H110 O6 N1  |
| pos_1541 | TG(18:0/17:0/22:5)  | pos | 940.8328  | C60 H110 O6 N1  |
| pos_1542 | TG(17:0/18:1/22:5)  | pos | 938.8171  | C60 H108 O6 N1  |
| pos_1543 | TG(18:0/17:0/22:6)  | pos | 921.7906  | C60 H105 O6     |
| pos_1544 | TG(16:1/20:5/21:1)  | pos | 919.7749  | C60 H103 O6     |
| pos_1545 | TG(19:1/16:1/22:5)  | pos | 936.8015  | C60 H106 O6 N1  |
| pos_1546 | TG(18:1/17:1/22:5)  | pos | 936.8015  | C60 H106 O6 N1  |
| pos_1547 | TG(17:0/18:1/22:6)  | pos | 941.7569  | C60 H102 O6 Na1 |
| pos_1548 | TG(18:1/17:1/22:6)  | pos | 939.7412  | C60 H100 O6 Na1 |
| pos_1550 | TG(18:3/17:1/22:5)  | pos | 932.7702  | C60 H102 O6 N1  |
| pos_1551 | TG(18:2/17:1/22:6)  | pos | 937.7256  | C60 H98 O6 Na1  |
| pos_1552 | TG(17:0/18:3/22:6)  | pos | 921.7518  | C60 H98 O6 Li1  |
| pos_1554 | TG(16:0/18:1/24:0)  | pos | 962.9110  | C61 H120 O6 N1  |

---

# Supplementary Material

|          |                     |     |          |                 |
|----------|---------------------|-----|----------|-----------------|
| pos_1557 | TG(18:1/18:3/22:6)  | pos | 949.7256 | C61 H98 O6 Na1  |
| pos_1558 | TG(18:1/20:4/20:5)  | pos | 933.7518 | C61 H98 O6 Li1  |
| pos_1560 | TG(16:0/20:5/22:6)  | pos | 925.7280 | C61 H97 O6      |
| pos_1561 | TG(16:1/20:5/22:5)  | pos | 942.7545 | C61 H100 O6 N1  |
| pos_1562 | TG(18:1/20:5/20:5)  | pos | 925.7280 | C61 H97 O6      |
| pos_1563 | TG(14:0/22:6/22:6)  | pos | 923.7123 | C61 H95 O6      |
| pos_1564 | TG(16:1/20:5/22:6)  | pos | 929.7205 | C61 H94 O6 Li1  |
| pos_1565 | TG(22:6/14:1/22:6)  | pos | 943.6786 | C61 H92 O6 Na1  |
| pos_1566 | TG(18:3e/20:5/20:5) | pos | 924.7440 | C61 H98 O5 N1   |
| pos_1567 | TG(22:6/14:2/22:6)  | pos | 936.7076 | C61 H94 O6 N1   |
| pos_1568 | TG(22:6/14:3/22:6)  | pos | 934.6919 | C61 H92 O6 N1   |
| pos_1569 | TG(16:0e/18:1/24:0) | pos | 948.9318 | C61 H122 O5 N1  |
| pos_1572 | TG(16:0/18:1/24:1)  | pos | 965.8508 | C61 H114 O6 Na1 |
| pos_1573 | TG(16:1e/18:0/24:1) | pos | 946.9161 | C61 H120 O5 N1  |
| pos_1574 | TG(16:1/18:1/24:1)  | pos | 958.8797 | C61 H116 O6 N1  |
| pos_1576 | TG(16:1e/18:1/24:1) | pos | 944.9005 | C61 H118 O5 N1  |
| pos_1579 | TG(16:0/20:4/22:0)  | pos | 956.8641 | C61 H114 O6 N1  |
| pos_1581 | TG(18:0/18:1/22:4)  | pos | 937.8219 | C61 H109 O6     |
| pos_1584 | TG(18:0/18:0/22:6)  | pos | 957.7882 | C61 H106 O6 Na1 |
| pos_1585 | TG(20:1e/16:0/22:5) | pos | 938.8535 | C61 H112 O5 N1  |
| pos_1586 | TG(18:1/18:1/22:5)  | pos | 955.7725 | C61 H104 O6 Na1 |
| pos_1587 | TG(18:0/18:1/22:6)  | pos | 950.8171 | C61 H108 O6 N1  |
| pos_1589 | TG(18:1/18:1/22:6)  | pos | 931.7749 | C61 H103 O6     |

---

|          |                     |     |          |                 |
|----------|---------------------|-----|----------|-----------------|
| pos_1590 | TG(18:1/18:2/22:6)  | pos | 929.7593 | C61 H101 O6     |
| pos_1591 | TG(16:1/20:4/22:4)  | pos | 929.7593 | C61 H101 O6     |
| pos_1592 | TG(18:1/18:3/22:5)  | pos | 929.7593 | C61 H101 O6     |
| pos_1593 | TG(16:0/20:3/22:6)  | pos | 929.7593 | C61 H101 O6     |
| pos_1594 | TG(18:0/18:0/23:0)  | pos | 978.9423 | C62 H124 O6 N1  |
| pos_1595 | TG(25:0/16:0/18:0)  | pos | 978.9423 | C62 H124 O6 N1  |
| pos_1596 | TG(26:0/9:0/24:1)   | pos | 976.9267 | C62 H122 O6 N1  |
| pos_1597 | TG(18:0/18:1/23:0)  | pos | 976.9267 | C62 H122 O6 N1  |
| pos_1598 | TG(17:0/20:4/22:6)  | pos | 958.7858 | C62 H104 O6 N1  |
| pos_1599 | TG(20:5/17:1/22:5)  | pos | 956.7702 | C62 H102 O6 N1  |
| pos_1600 | TG(20:4/17:1/22:6)  | pos | 961.7256 | C62 H98 O6 Na1  |
| pos_1601 | TG(15:0/22:5/22:6)  | pos | 961.7256 | C62 H98 O6 Na1  |
| pos_1602 | TG(17:0/20:5/22:6)  | pos | 956.7702 | C62 H102 O6 N1  |
| pos_1603 | TG(15:0/22:6/22:6)  | pos | 943.7361 | C62 H96 O6 Li1  |
| pos_1604 | TG(20:5/17:1/22:6)  | pos | 959.7099 | C62 H96 O6 Na1  |
| pos_1605 | TG(18:0e/18:1/23:0) | pos | 962.9474 | C62 H124 O5 N1  |
| pos_1606 | TG(18:1/18:1/23:0)  | pos | 979.8664 | C62 H116 O6 Na1 |
| pos_1607 | TG(18:0e/18:1/23:1) | pos | 960.9318 | C62 H122 O5 N1  |
| pos_1608 | TG(18:1/17:1/24:1)  | pos | 972.8954 | C62 H118 O6 N1  |
| pos_1610 | TG(16:0/21:0/22:4)  | pos | 970.8797 | C62 H116 O6 N1  |
| pos_1612 | TG(16:0/21:0/22:5)  | pos | 968.8641 | C62 H114 O6 N1  |
| pos_1613 | TG(16:0/20:5/23:0)  | pos | 968.8641 | C62 H114 O6 N1  |
| pos_1614 | TG(19:1/18:1/22:4)  | pos | 966.8484 | C62 H112 O6 N1  |

---

# Supplementary Material

|          |                    |     |          |                 |
|----------|--------------------|-----|----------|-----------------|
| pos_1615 | TG(19:0/18:1/22:5) | pos | 966.8484 | C62 H112 O6 N1  |
| pos_1616 | TG(16:0/21:0/22:6) | pos | 966.8484 | C62 H112 O6 N1  |
| pos_1618 | TG(19:1/18:1/22:5) | pos | 964.8328 | C62 H110 O6 N1  |
| pos_1619 | TG(19:0/18:1/22:6) | pos | 964.8328 | C62 H110 O6 N1  |
| pos_1620 | TG(19:1/18:1/22:6) | pos | 962.8171 | C62 H108 O6 N1  |
| pos_1621 | TG(20:2/17:1/22:6) | pos | 960.8015 | C62 H106 O6 N1  |
| pos_1622 | TG(20:0/16:0/24:0) | pos | 992.9580 | C63 H126 O6 N1  |
| pos_1623 | TG(18:0/18:1/24:0) | pos | 990.9423 | C63 H124 O6 N1  |
| pos_1625 | TG(18:1/20:3/22:6) | pos | 955.7749 | C63 H103 O6     |
| pos_1627 | TG(16:0/22:4/22:6) | pos | 955.7749 | C63 H103 O6     |
| pos_1628 | TG(18:0/20:4/22:6) | pos | 972.8015 | C63 H106 O6 N1  |
| pos_1629 | TG(18:1/20:4/22:5) | pos | 955.7749 | C63 H103 O6     |
| pos_1630 | TG(18:1/20:4/22:6) | pos | 975.7412 | C63 H100 O6 Na1 |
| pos_1631 | TG(16:0/22:5/22:6) | pos | 953.7593 | C63 H101 O6     |
| pos_1632 | TG(18:0/20:5/22:6) | pos | 959.7674 | C63 H100 O6 Li1 |
| pos_1633 | TG(16:0/22:6/22:6) | pos | 951.7436 | C63 H99 O6      |
| pos_1634 | TG(16:1/22:5/22:6) | pos | 973.7256 | C63 H98 O6 Na1  |
| pos_1635 | TG(18:1/20:5/22:6) | pos | 973.7256 | C63 H98 O6 Na1  |
| pos_1636 | TG(16:1/22:6/22:6) | pos | 949.7280 | C63 H97 O6      |
| pos_1637 | TG(18:3/20:4/22:6) | pos | 971.7099 | C63 H96 O6 Na1  |
| pos_1638 | TG(18:3/20:5/22:5) | pos | 971.7099 | C63 H96 O6 Na1  |
| pos_1639 | TG(20:5/18:2/22:6) | pos | 971.7099 | C63 H96 O6 Na1  |
| pos_1640 | TG(18:3/20:5/22:6) | pos | 947.7123 | C63 H95 O6      |

---

|          |                     |     |           |                 |
|----------|---------------------|-----|-----------|-----------------|
| pos_1641 | TG(16:2e/22:6/22:6) | pos | 950.7596  | C63 H100 O5 N1  |
| pos_1642 | TG(18:4/20:5/22:6)  | pos | 967.6786  | C63 H92 O6 Na1  |
| pos_1643 | TG(20:5/20:5/20:5)  | pos | 951.7048  | C63 H92 O6 Li1  |
| pos_1644 | TG(18:0e/18:1/24:0) | pos | 976.9631  | C63 H126 O5 N1  |
| pos_1645 | TG(18:1/18:1/24:0)  | pos | 993.8821  | C63 H118 O6 Na1 |
| pos_1646 | TG(26:1/16:0/18:1)  | pos | 988.9267  | C63 H122 O6 N1  |
| pos_1647 | TG(18:0e/18:1/24:1) | pos | 974.9474  | C63 H124 O5 N1  |
| pos_1648 | TG(18:1/18:1/24:1)  | pos | 991.8664  | C63 H116 O6 Na1 |
| pos_1649 | TG(18:1/18:2/24:0)  | pos | 991.8664  | C63 H116 O6 Na1 |
| pos_1650 | TG(24:0/12:2/24:1)  | pos | 969.8845  | C63 H117 O6     |
| pos_1652 | TG(18:1/18:2/24:1)  | pos | 984.8954  | C63 H118 O6 N1  |
| pos_1653 | TG(16:0/20:4/24:0)  | pos | 984.8954  | C63 H118 O6 N1  |
| pos_1654 | TG(16:0/20:4/24:1)  | pos | 987.8351  | C63 H112 O6 Na1 |
| pos_1655 | TG(16:0/20:5/24:0)  | pos | 987.8351  | C63 H112 O6 Na1 |
| pos_1656 | TG(20:4e/16:0/24:1) | pos | 951.8739  | C63 H115 O5     |
| pos_1658 | TG(16:0/20:5/24:1)  | pos | 985.8195  | C63 H110 O6 Na1 |
| pos_1659 | TG(16:0/22:0/22:6)  | pos | 963.8375  | C63 H111 O6     |
| pos_1660 | TG(20:1/18:1/22:5)  | pos | 961.8219  | C63 H109 O6     |
| pos_1661 | TG(16:0/22:1/22:6)  | pos | 961.8219  | C63 H109 O6     |
| pos_1662 | TG(20:1/18:1/22:6)  | pos | 981.7882  | C63 H106 O6 Na1 |
| pos_1663 | TG(18:0/20:3/22:6)  | pos | 974.8171  | C63 H108 O6 N1  |
| pos_1664 | TG(18:0/20:5/22:4)  | pos | 957.7906  | C63 H105 O6     |
| pos_1665 | TG(18:0/19:0/24:1)  | pos | 1004.9580 | C64 H126 O6 N1  |

---

## Supplementary Material

|          |                    |     |           |                 |
|----------|--------------------|-----|-----------|-----------------|
| pos_1666 | TG(16:0/22:1/23:0) | pos | 1009.9134 | C64 H122 O6 Na1 |
| pos_1667 | TG(19:0/20:4/22:6) | pos | 986.8171  | C64 H108 O6 N1  |
| pos_1668 | TG(17:0/22:5/22:6) | pos | 984.8015  | C64 H106 O6 N1  |
| pos_1669 | TG(22:5/17:1/22:6) | pos | 987.7412  | C64 H100 O6 Na1 |
| pos_1670 | TG(17:0/22:6/22:6) | pos | 987.7412  | C64 H100 O6 Na1 |
| pos_1671 | TG(22:6/17:1/22:6) | pos | 980.7702  | C64 H102 O6 N1  |
| pos_1672 | TG(25:0/18:1/18:1) | pos | 1007.8977 | C64 H120 O6 Na1 |
| pos_1673 | TG(19:1/18:1/24:1) | pos | 1000.9267 | C64 H122 O6 N1  |
| pos_1674 | TG(24:1/17:1/20:2) | pos | 998.9110  | C64 H120 O6 N1  |
| pos_1677 | TG(18:1/20:4/23:0) | pos | 979.8688  | C64 H115 O6     |
| pos_1679 | TG(16:0/22:5/23:1) | pos | 994.8797  | C64 H116 O6 N1  |
| pos_1680 | TG(16:0/22:6/23:0) | pos | 977.8532  | C64 H113 O6     |
| pos_1681 | TG(18:1/21:1/22:5) | pos | 992.8641  | C64 H114 O6 N1  |
| pos_1682 | TG(22:1/17:1/22:5) | pos | 992.8641  | C64 H114 O6 N1  |
| pos_1683 | TG(16:0/22:6/23:1) | pos | 992.8641  | C64 H114 O6 N1  |
| pos_1684 | TG(19:1/20:1/22:6) | pos | 990.8484  | C64 H112 O6 N1  |
| pos_1685 | TG(22:1/17:1/22:6) | pos | 990.8484  | C64 H112 O6 N1  |
| pos_1686 | TG(22:4/17:1/22:4) | pos | 988.8328  | C64 H110 O6 N1  |
| pos_1687 | TG(17:0/22:4/22:5) | pos | 988.8328  | C64 H110 O6 N1  |
| pos_1688 | TG(19:1/20:2/22:6) | pos | 971.8062  | C64 H107 O6     |
| pos_1689 | TG(16:0/22:1/24:0) | pos | 1018.9736 | C65 H128 O6 N1  |
| pos_1690 | TG(18:1/22:4/22:5) | pos | 1000.8328 | C65 H110 O6 N1  |
| pos_1692 | TG(18:0/22:4/22:6) | pos | 1000.8328 | C65 H110 O6 N1  |

---

|          |                     |     |           |                 |
|----------|---------------------|-----|-----------|-----------------|
| pos_1694 | TG(18:0/22:5/22:6)  | pos | 998.8171  | C65 H108 O6 N1  |
| pos_1695 | TG(18:1/22:5/22:5)  | pos | 981.7906  | C65 H105 O6     |
| pos_1696 | TG(18:1/22:5/22:6)  | pos | 1001.7569 | C65 H102 O6 Na1 |
| pos_1697 | TG(18:0/22:6/22:6)  | pos | 979.7749  | C65 H103 O6     |
| pos_1698 | TG(22:5/18:2/22:6)  | pos | 994.7858  | C65 H104 O6 N1  |
| pos_1699 | TG(18:1/22:6/22:6)  | pos | 999.7412  | C65 H100 O6 Na1 |
| pos_1700 | TG(18:3/22:5/22:6)  | pos | 992.7702  | C65 H102 O6 N1  |
| pos_1701 | TG(18:2/22:6/22:6)  | pos | 997.7256  | C65 H98 O6 Na1  |
| pos_1702 | TG(20:5/20:4/22:6)  | pos | 973.7280  | C65 H97 O6      |
| pos_1704 | TG(18:3e/22:6/22:6) | pos | 976.7753  | C65 H102 O5 N1  |
| pos_1705 | TG(20:5/20:5/22:6)  | pos | 971.7123  | C65 H95 O6      |
| pos_1707 | TG(16:0/22:1/24:1)  | pos | 1016.9580 | C65 H126 O6 N1  |
| pos_1708 | TG(16:0e/22:1/24:1) | pos | 1002.9787 | C65 H128 O5 N1  |
| pos_1709 | TG(18:1/22:1/22:1)  | pos | 1019.8977 | C65 H120 O6 Na1 |
| pos_1710 | TG(16:1e/22:1/24:1) | pos | 1000.9631 | C65 H126 O5 N1  |
| pos_1711 | TG(16:0/22:4/24:0)  | pos | 1012.9267 | C65 H122 O6 N1  |
| pos_1712 | TG(16:0/22:4/24:1)  | pos | 1010.9110 | C65 H120 O6 N1  |
| pos_1713 | TG(16:0/22:5/24:0)  | pos | 1015.8664 | C65 H116 O6 Na1 |
| pos_1714 | TG(16:0/22:5/24:1)  | pos | 991.8688  | C65 H115 O6     |
| pos_1715 | TG(16:0/22:6/24:0)  | pos | 991.8688  | C65 H115 O6     |
| pos_1716 | TG(18:1/22:1/22:5)  | pos | 989.8532  | C65 H113 O6     |
| pos_1717 | TG(16:0/22:6/24:1)  | pos | 1011.8351 | C65 H112 O6 Na1 |
| pos_1719 | TG(18:1/22:2/22:6)  | pos | 1002.8484 | C65 H112 O6 N1  |

---

# Supplementary Material

|          |                    |     |           |                 |
|----------|--------------------|-----|-----------|-----------------|
| pos_1720 | TG(20:0/20:3/22:6) | pos | 1002.8484 | C65 H112 O6 N1  |
| pos_1721 | TG(20:1/20:2/22:6) | pos | 985.8219  | C65 H109 O6     |
| pos_1722 | TG(16:0/23:0/24:1) | pos | 1032.9893 | C66 H130 O6 N1  |
| pos_1723 | TG(19:0/22:4/22:6) | pos | 1014.8484 | C66 H112 O6 N1  |
| pos_1724 | TG(19:0/22:5/22:6) | pos | 1012.8328 | C66 H110 O6 N1  |
| pos_1727 | TG(19:1/22:6/22:6) | pos | 1008.8015 | C66 H106 O6 N1  |
| pos_1728 | TG(15:0/24:1/24:1) | pos | 1019.9552 | C66 H124 O6 Li1 |
| pos_1729 | TG(17:0/22:1/24:1) | pos | 1030.9736 | C66 H128 O6 N1  |
| pos_1730 | TG(24:1/17:1/22:1) | pos | 1028.9580 | C66 H126 O6 N1  |
| pos_1731 | TG(18:1/22:1/23:1) | pos | 1033.9134 | C66 H122 O6 Na1 |
| pos_1732 | TG(24:1/17:1/22:2) | pos | 1026.9423 | C66 H124 O6 N1  |
| pos_1734 | TG(27:1/12:2/24:1) | pos | 1009.9158 | C66 H121 O6     |
| pos_1735 | TG(17:0/22:4/24:1) | pos | 1024.9267 | C66 H122 O6 N1  |
| pos_1736 | TG(25:0/16:0/22:5) | pos | 1024.9267 | C66 H122 O6 N1  |
| pos_1737 | TG(24:1/17:1/22:4) | pos | 1022.9110 | C66 H120 O6 N1  |
| pos_1738 | TG(18:1/22:5/23:0) | pos | 1022.9110 | C66 H120 O6 N1  |
| pos_1739 | TG(18:0/22:6/23:0) | pos | 1022.9110 | C66 H120 O6 N1  |
| pos_1740 | TG(24:0/17:1/22:5) | pos | 1005.8845 | C66 H117 O6     |
| pos_1742 | TG(18:1/22:6/23:0) | pos | 1020.8954 | C66 H118 O6 N1  |
| pos_1744 | TG(24:1/17:1/22:6) | pos | 1018.8797 | C66 H116 O6 N1  |
| pos_1745 | TG(24:2/17:1/22:6) | pos | 1016.8641 | C66 H114 O6 N1  |
| pos_1746 | TG(20:2/21:1/22:6) | pos | 999.8375  | C66 H111 O6     |
| pos_1748 | TG(22:1/20:4/22:5) | pos | 1028.8641 | C67 H114 O6 N1  |



---

|          |                     |     |           |                 |
|----------|---------------------|-----|-----------|-----------------|
| pos_1749 | TG(20:0/22:4/22:6)  | pos | 1028.8641 | C67 H114 O6 N1  |
| pos_1751 | TG(20:1/22:4/22:6)  | pos | 1026.8484 | C67 H112 O6 N1  |
| pos_1752 | TG(20:0/22:5/22:6)  | pos | 1026.8484 | C67 H112 O6 N1  |
| pos_1753 | TG(20:1/22:5/22:6)  | pos | 1024.8328 | C67 H110 O6 N1  |
| pos_1754 | TG(20:0/22:6/22:6)  | pos | 1024.8328 | C67 H110 O6 N1  |
| pos_1755 | TG(20:2/22:5/22:6)  | pos | 1022.8171 | C67 H108 O6 N1  |
| pos_1756 | TG(20:1/22:6/22:6)  | pos | 1022.8171 | C67 H108 O6 N1  |
| pos_1757 | TG(20:3/22:5/22:6)  | pos | 1020.8015 | C67 H106 O6 N1  |
| pos_1758 | TG(20:2/22:6/22:6)  | pos | 1025.7569 | C67 H102 O6 Na1 |
| pos_1760 | TG(20:3/22:6/22:6)  | pos | 1001.7593 | C67 H101 O6     |
| pos_1761 | TG(20:5/22:5/22:6)  | pos | 999.7436  | C67 H99 O6      |
| pos_1762 | TG(20:4/22:6/22:6)  | pos | 1016.7702 | C67 H102 O6 N1  |
| pos_1764 | TG(18:0/22:1/24:1)  | pos | 1044.9893 | C67 H130 O6 N1  |
| pos_1765 | TG(18:1/22:1/24:1)  | pos | 1047.9290 | C67 H124 O6 Na1 |
| pos_1766 | TG(16:1e/24:1/24:1) | pos | 1028.9944 | C67 H130 O5 N1  |
| pos_1767 | TG(18:0/22:4/24:0)  | pos | 1040.9580 | C67 H126 O6 N1  |
| pos_1768 | TG(18:0/22:4/24:1)  | pos | 1038.9423 | C67 H124 O6 N1  |
| pos_1769 | TG(18:0/22:5/24:0)  | pos | 1038.9423 | C67 H124 O6 N1  |
| pos_1770 | TG(18:1/22:4/24:1)  | pos | 1036.9267 | C67 H122 O6 N1  |
| pos_1771 | TG(18:1/22:5/24:0)  | pos | 1041.8821 | C67 H118 O6 Na1 |
| pos_1772 | TG(18:0/22:6/24:0)  | pos | 1036.9267 | C67 H122 O6 N1  |
| pos_1773 | TG(18:1/22:5/24:1)  | pos | 1017.8845 | C67 H117 O6     |
| pos_1775 | TG(18:1/22:6/24:0)  | pos | 1017.8845 | C67 H117 O6     |

---

## Supplementary Material

---

|          |                     |     |           |                 |
|----------|---------------------|-----|-----------|-----------------|
| pos_1777 | TG(24:1/18:2/22:5)  | pos | 1032.8954 | C67 H118 O6 N1  |
| pos_1778 | TG(18:1/22:6/24:1)  | pos | 1037.8508 | C67 H114 O6 Na1 |
| pos_1779 | TG(24:1/18:2/22:6)  | pos | 1030.8797 | C67 H116 O6 N1  |
| pos_1781 | TG(20:1/22:2/22:6)  | pos | 1013.8532 | C67 H113 O6     |
| pos_1782 | TG(20:2e/22:1/22:6) | pos | 1005.8821 | C67 H114 O5 Li1 |
| pos_1784 | TG(22:4/21:0/22:6)  | pos | 1042.8797 | C68 H116 O6 N1  |
| pos_1785 | TG(20:4/22:6/23:0)  | pos | 1042.8797 | C68 H116 O6 N1  |
| pos_1788 | TG(20:5/22:6/23:0)  | pos | 1040.8641 | C68 H114 O6 N1  |
| pos_1789 | TG(20:5/22:6/23:1)  | pos | 1038.8484 | C68 H112 O6 N1  |
| pos_1790 | TG(22:6/21:0/22:6)  | pos | 1038.8484 | C68 H112 O6 N1  |
| pos_1793 | TG(18:1/23:0/24:1)  | pos | 1059.0049 | C68 H132 O6 N1  |
| pos_1794 | TG(24:1/17:1/24:1)  | pos | 1061.9447 | C68 H126 O6 Na1 |
| pos_1795 | TG(24:1/18:2/23:1)  | pos | 1054.9736 | C68 H128 O6 N1  |
| pos_1798 | TG(26:0/17:0/22:5)  | pos | 1035.9314 | C68 H123 O6     |
| pos_1799 | TG(25:0/18:0/22:5)  | pos | 1052.9580 | C68 H126 O6 N1  |
| pos_1800 | TG(25:0/18:1/22:5)  | pos | 1050.9423 | C68 H124 O6 N1  |
| pos_1801 | TG(25:1/18:1/22:5)  | pos | 1048.9267 | C68 H122 O6 N1  |
| pos_1802 | TG(25:0/18:1/22:6)  | pos | 1048.9267 | C68 H122 O6 N1  |
| pos_1803 | TG(19:1/22:6/24:1)  | pos | 1046.9110 | C68 H120 O6 N1  |
| pos_1804 | TG(25:1/18:1/22:6)  | pos | 1046.9110 | C68 H120 O6 N1  |
| pos_1805 | TG(22:4/20:4/23:1)  | pos | 1044.8954 | C68 H118 O6 N1  |
| pos_1806 | TG(25:1/18:2/22:6)  | pos | 1044.8954 | C68 H118 O6 N1  |
| pos_1808 | TG(24:1/20:4/22:5)  | pos | 1056.8954 | C69 H118 O6 N1  |

---

---

|          |                    |     |           |                |
|----------|--------------------|-----|-----------|----------------|
| pos_1809 | TG(22:0/22:4/22:6) | pos | 1056.8954 | C69 H118 O6 N1 |
| pos_1810 | TG(24:0/20:4/22:6) | pos | 1056.8954 | C69 H118 O6 N1 |
| pos_1811 | TG(22:1/22:5/22:5) | pos | 1054.8797 | C69 H116 O6 N1 |
| pos_1812 | TG(22:0/22:5/22:6) | pos | 1054.8797 | C69 H116 O6 N1 |
| pos_1813 | TG(22:1/22:5/22:6) | pos | 1052.8641 | C69 H114 O6 N1 |
| pos_1814 | TG(22:0/22:6/22:6) | pos | 1052.8641 | C69 H114 O6 N1 |
| pos_1815 | TG(22:2/22:5/22:6) | pos | 1050.8484 | C69 H112 O6 N1 |
| pos_1816 | TG(22:1/22:6/22:6) | pos | 1050.8484 | C69 H112 O6 N1 |
| pos_1817 | TG(22:4/22:4/22:6) | pos | 1048.8328 | C69 H110 O6 N1 |
| pos_1818 | TG(22:2/22:6/22:6) | pos | 1048.8328 | C69 H110 O6 N1 |
| pos_1819 | TG(22:4/22:5/22:6) | pos | 1046.8171 | C69 H108 O6 N1 |
| pos_1820 | TG(22:5/22:5/22:6) | pos | 1044.8015 | C69 H106 O6 N1 |
| pos_1821 | TG(22:5/22:6/22:6) | pos | 1042.7858 | C69 H104 O6 N1 |
| pos_1822 | TG(22:6/22:6/22:6) | pos | 1023.7436 | C69 H99 O6     |
| pos_1823 | TG(18:1/24:0/24:1) | pos | 1073.0206 | C69 H134 O6 N1 |
| pos_1824 | TG(18:1/24:1/24:1) | pos | 1071.0049 | C69 H132 O6 N1 |
| pos_1825 | TG(18:1/24:1/24:2) | pos | 1068.9893 | C69 H130 O6 N1 |
| pos_1826 | TG(20:0/22:4/24:0) | pos | 1068.9893 | C69 H130 O6 N1 |
| pos_1827 | TG(20:1/22:4/24:0) | pos | 1066.9736 | C69 H128 O6 N1 |
| pos_1829 | TG(22:1/22:1/22:4) | pos | 1064.9580 | C69 H126 O6 N1 |
| pos_1830 | TG(26:1/18:0/22:5) | pos | 1064.9580 | C69 H126 O6 N1 |
| pos_1831 | TG(22:0/22:0/22:6) | pos | 1064.9580 | C69 H126 O6 N1 |
| pos_1832 | TG(22:1/22:1/22:5) | pos | 1062.9423 | C69 H124 O6 N1 |

---

# Supplementary Material

|          |                    |     |           |                 |
|----------|--------------------|-----|-----------|-----------------|
| pos_1833 | TG(26:1/18:1/22:5) | pos | 1062.9423 | C69 H124 O6 N1  |
| pos_1835 | TG(20:1/22:5/24:1) | pos | 1045.9158 | C69 H121 O6     |
| pos_1836 | TG(24:1/20:2/22:5) | pos | 1060.9267 | C69 H122 O6 N1  |
| pos_1837 | TG(26:1/18:1/22:6) | pos | 1065.8821 | C69 H118 O6 Na1 |
| pos_1838 | TG(22:1/22:1/22:6) | pos | 1043.9001 | C69 H119 O6     |
| pos_1839 | TG(24:1/20:3/22:5) | pos | 1058.9110 | C69 H120 O6 N1  |
| pos_1840 | TG(24:1/20:2/22:6) | pos | 1058.9110 | C69 H120 O6 N1  |
| pos_1841 | TG(24:0/20:4/22:5) | pos | 1058.9110 | C69 H120 O6 N1  |
| pos_1842 | TG(24:0/20:5/22:4) | pos | 1041.8845 | C69 H117 O6     |
| pos_1843 | TG(22:1/22:2/22:6) | pos | 1041.8845 | C69 H117 O6     |
| pos_1844 | TG(22:4/22:6/23:0) | pos | 1070.9110 | C70 H120 O6 N1  |
| pos_1845 | TG(22:4/22:6/23:1) | pos | 1068.8954 | C70 H118 O6 N1  |
| pos_1846 | TG(22:5/22:6/23:0) | pos | 1068.8954 | C70 H118 O6 N1  |
| pos_1847 | TG(22:5/22:6/23:1) | pos | 1066.8797 | C70 H116 O6 N1  |
| pos_1848 | TG(22:6/22:6/23:0) | pos | 1066.8797 | C70 H116 O6 N1  |
| pos_1849 | TG(22:6/22:6/23:1) | pos | 1064.8641 | C70 H114 O6 N1  |
| pos_1850 | TG(25:0/18:1/24:1) | pos | 1087.0362 | C70 H136 O6 N1  |
| pos_1851 | TG(25:1/18:1/24:1) | pos | 1085.0206 | C70 H134 O6 N1  |
| pos_1852 | TG(24:1/20:2/23:1) | pos | 1083.0049 | C70 H132 O6 N1  |
| pos_1855 | TG(24:1/21:0/22:5) | pos | 1078.9736 | C70 H128 O6 N1  |
| pos_1856 | TG(22:0/22:6/23:0) | pos | 1061.9471 | C70 H125 O6     |
| pos_1857 | TG(24:0/21:0/22:6) | pos | 1078.9736 | C70 H128 O6 N1  |
| pos_1858 | TG(22:1/22:5/23:1) | pos | 1076.9580 | C70 H126 O6 N1  |

---

|          |                    |     |           |                 |
|----------|--------------------|-----|-----------|-----------------|
| pos_1859 | TG(22:1/22:6/23:0) | pos | 1076.9580 | C70 H126 O6 N1  |
| pos_1860 | TG(24:1/21:1/22:6) | pos | 1074.9423 | C70 H124 O6 N1  |
| pos_1861 | TG(22:1/22:6/23:1) | pos | 1074.9423 | C70 H124 O6 N1  |
| pos_1862 | TG(22:4/22:4/23:1) | pos | 1072.9267 | C70 H122 O6 N1  |
| pos_1863 | TG(24:1/22:4/22:5) | pos | 1084.9267 | C71 H122 O6 N1  |
| pos_1864 | TG(24:0/22:4/22:6) | pos | 1084.9267 | C71 H122 O6 N1  |
| pos_1865 | TG(24:1/22:4/22:6) | pos | 1082.9110 | C71 H120 O6 N1  |
| pos_1867 | TG(24:1/22:5/22:6) | pos | 1080.8954 | C71 H118 O6 N1  |
| pos_1868 | TG(24:0/22:6/22:6) | pos | 1080.8954 | C71 H118 O6 N1  |
| pos_1869 | TG(22:5/22:6/24:2) | pos | 1078.8797 | C71 H116 O6 N1  |
| pos_1870 | TG(24:1/22:6/22:6) | pos | 1078.8797 | C71 H116 O6 N1  |
| pos_1872 | TG(24:0/22:1/22:1) | pos | 1101.0519 | C71 H138 O6 N1  |
| pos_1873 | TG(24:1/22:1/22:1) | pos | 1103.9916 | C71 H132 O6 Na1 |
| pos_1874 | TG(24:1/22:1/22:2) | pos | 1097.0206 | C71 H134 O6 N1  |
| pos_1875 | TG(24:0/20:4/24:1) | pos | 1095.0049 | C71 H132 O6 N1  |
| pos_1877 | TG(24:1/22:1/22:4) | pos | 1092.9893 | C71 H130 O6 N1  |
| pos_1879 | TG(22:0/22:6/24:0) | pos | 1075.9627 | C71 H127 O6     |
| pos_1880 | TG(24:1/22:1/22:5) | pos | 1090.9736 | C71 H128 O6 N1  |
| pos_1881 | TG(22:0/22:6/24:1) | pos | 1095.9290 | C71 H124 O6 Na1 |
| pos_1882 | TG(24:1/22:1/22:6) | pos | 1088.9580 | C71 H126 O6 N1  |
| pos_1883 | TG(24:1/22:4/22:4) | pos | 1086.9423 | C71 H124 O6 N1  |
| pos_1884 | TG(24:1/22:2/22:6) | pos | 1086.9423 | C71 H124 O6 N1  |
| pos_1885 | TG(26:0/20:3/22:6) | pos | 1069.9158 | C71 H121 O6     |

---

# Supplementary Material

|          |                    |     |           |                 |
|----------|--------------------|-----|-----------|-----------------|
| pos_1886 | TG(24:1/22:1/23:1) | pos | 1113.0519 | C72 H138 O6 N1  |
| pos_1888 | TG(24:1/22:5/23:0) | pos | 1107.0049 | C72 H132 O6 N1  |
| pos_1889 | TG(24:1/22:4/23:1) | pos | 1089.9784 | C72 H129 O6     |
| pos_1890 | TG(24:0/22:6/23:0) | pos | 1107.0049 | C72 H132 O6 N1  |
| pos_1891 | TG(24:1/22:5/23:1) | pos | 1104.9893 | C72 H130 O6 N1  |
| pos_1892 | TG(24:1/22:6/23:0) | pos | 1104.9893 | C72 H130 O6 N1  |
| pos_1894 | TG(26:1/22:4/22:5) | pos | 1112.9580 | C73 H126 O6 N1  |
| pos_1896 | TG(26:1/22:5/22:6) | pos | 1108.9267 | C73 H122 O6 N1  |
| pos_1897 | TG(26:0/22:6/22:6) | pos | 1108.9267 | C73 H122 O6 N1  |
| pos_1898 | TG(26:1/22:6/22:6) | pos | 1106.9110 | C73 H120 O6 N1  |
| pos_1899 | TG(24:1/22:1/24:1) | pos | 1132.0229 | C73 H136 O6 Na1 |
| pos_1900 | TG(24:1/22:2/24:1) | pos | 1125.0519 | C73 H138 O6 N1  |
| pos_1904 | TG(24:0/22:6/24:0) | pos | 1121.0206 | C73 H134 O6 N1  |
| pos_1905 | TG(24:1/22:5/24:1) | pos | 1123.9603 | C73 H128 O6 Na1 |
| pos_1906 | TG(24:0/22:6/24:1) | pos | 1123.9603 | C73 H128 O6 Na1 |
| pos_1907 | TG(24:1/22:5/24:2) | pos | 1116.9893 | C73 H130 O6 N1  |
| pos_1908 | TG(24:1/22:6/24:1) | pos | 1121.9447 | C73 H126 O6 Na1 |
| pos_1909 | TG(26:1/22:4/22:4) | pos | 1114.9736 | C73 H128 O6 N1  |
| pos_1910 | TG(24:1/22:6/24:2) | pos | 1114.9736 | C73 H128 O6 N1  |
| pos_1912 | TG(25:1/22:5/24:1) | pos | 1133.0206 | C74 H134 O6 N1  |
| pos_1913 | TG(25:0/22:6/24:1) | pos | 1133.0206 | C74 H134 O6 N1  |
| pos_1914 | TG(25:1/22:6/24:1) | pos | 1131.0049 | C74 H132 O6 N1  |
| pos_1915 | TG(28:0/22:5/22:5) | pos | 1140.9893 | C75 H130 O6 N1  |

---

|          |                         |     |           |                 |
|----------|-------------------------|-----|-----------|-----------------|
| pos_1917 | TG(28:0/22:6/22:6)      | pos | 1136.9580 | C75 H126 O6 N1  |
| pos_1918 | TG(28:1/22:6/22:6)      | pos | 1134.9423 | C75 H124 O6 N1  |
| pos_1920 | TG(26:1/22:5/24:1)      | pos | 1147.0362 | C75 H136 O6 N1  |
| pos_1921 | TG(26:0/22:6/24:1)      | pos | 1147.0362 | C75 H136 O6 N1  |
| pos_1922 | TG(26:1/22:6/24:1)      | pos | 1145.0206 | C75 H134 O6 N1  |
| pos_1923 | TG(26:1/22:6/24:2)      | pos | 1143.0049 | C75 H132 O6 N1  |
| pos_1925 | TG(30:0/22:6/22:6)      | pos | 1164.9893 | C77 H130 O6 N1  |
| pos_1926 | TG(30:0/22:1/22:6)      | pos | 1175.0675 | C77 H140 O6 N1  |
| pos_1927 | TG(28:1/22:6/24:1)      | pos | 1173.0519 | C77 H138 O6 N1  |
| pos_1928 | TG(30:1/22:6/24:1)      | pos | 1201.0832 | C79 H142 O6 N1  |
| pos_1929 | WE(3:0/16:1)            | pos | 314.3054  | H40 C19 O2 N1   |
| pos_1930 | WE(3:0/18:1)            | pos | 342.3367  | H44 C21 O2 N1   |
| pos_1931 | WE(3:0/18:2)            | pos | 340.3210  | H42 C21 O2 N1   |
| pos_1932 | WE(3:0/19:1)            | pos | 356.3523  | H46 C22 O2 N1   |
| pos_1933 | WE(3:0/20:1)            | pos | 370.3680  | H48 C23 O2 N1   |
| pos_1934 | WE(3:0/20:2)            | pos | 368.3523  | H46 C23 O2 N1   |
| pos_1935 | ZyE(20:4)               | pos | 671.5762  | C47 H75 O2      |
| pos_1936 | ZyE(20:5)               | pos | 669.5605  | C47 H73 O2      |
| pos_1937 | ZyE(22:4)               | pos | 716.6340  | C49 H82 O2 N1   |
| pos_1938 | ZyE(22:5)               | pos | 697.5918  | C49 H77 O2      |
| pos_1939 | ZyE(22:6)               | pos | 695.5762  | C49 H75 O2      |
| pos_147  | DG(16:0/18:1)           | pos | 617.5115  | C37 H70 O5 Na1  |
| neg_1    | CL(14:0/16:0/16:0/18:0) | neg | 675.4788  | C73 H140 O17 P2 |

---

# Supplementary Material

|        |                         |     |          |                 |
|--------|-------------------------|-----|----------|-----------------|
| neg_2  | CL(16:0/16:0/16:0/16:0) | neg | 675.4788 | C73 H140 O17 P2 |
| neg_3  | CL(14:0/16:0/16:1/18:1) | neg | 673.4632 | C73 H136 O17 P2 |
| neg_4  | CL(16:0/16:0/18:0/18:0) | neg | 703.5101 | C77 H148 O17 P2 |
| neg_5  | CL(16:0/16:0/16:0/20:0) | neg | 703.5101 | C77 H148 O17 P2 |
| neg_6  | CL(18:1/16:0/16:0/18:1) | neg | 701.4945 | C77 H144 O17 P2 |
| neg_7  | CL(18:1/16:1/16:1/18:1) | neg | 699.4788 | C77 H140 O17 P2 |
| neg_8  | CL(23:1/14:0/16:0/18:1) | neg | 722.5180 | C80 H150 O17 P2 |
| neg_9  | CL(24:0/14:0/16:0/18:0) | neg | 731.5414 | C81 H156 O17 P2 |
| neg_10 | CL(20:5/16:0/16:1/20:4) | neg | 721.4632 | C81 H136 O17 P2 |
| neg_12 | CL(14:0/18:0/20:4/20:4) | neg | 723.4788 | C81 H140 O17 P2 |
| neg_14 | CL(23:0/15:0/16:0/20:0) | neg | 745.5571 | C83 H160 O17 P2 |
| neg_15 | CL(24:0/15:0/16:0/20:4) | neg | 748.5336 | C84 H154 O17 P2 |
| neg_16 | CL(20:5/15:0/18:1/22:0) | neg | 746.5180 | C84 H150 O17 P2 |
| neg_17 | CL(21:0/16:0/16:0/22:6) | neg | 746.5180 | C84 H150 O17 P2 |
| neg_18 | CL(19:0/16:1/18:1/22:6) | neg | 744.5023 | C84 H146 O17 P2 |
| neg_19 | CL(24:0/16:0/16:0/20:0) | neg | 759.5727 | C85 H164 O17 P2 |
| neg_20 | CL(24:0/16:0/16:1/20:1) | neg | 757.5571 | C85 H160 O17 P2 |
| neg_21 | CL(23:1/14:0/16:0/24:1) | neg | 764.5649 | C86 H162 O17 P2 |
| neg_22 | CL(23:0/16:0/18:0/20:4) | neg | 762.5493 | C86 H158 O17 P2 |
| neg_23 | CL(23:0/16:0/16:0/22:6) | neg | 760.5336 | C86 H154 O17 P2 |
| neg_24 | CL(21:0/16:1/18:1/22:6) | neg | 758.5180 | C86 H150 O17 P2 |
| neg_25 | CL(22:4/16:0/16:1/24:1) | neg | 767.5414 | C87 H156 O17 P2 |
| neg_26 | CL(19:0/18:1/20:3/22:6) | neg | 770.5180 | C88 H150 O17 P2 |



---

|        |                         |     |           |                 |
|--------|-------------------------|-----|-----------|-----------------|
| neg_27 | CL(21:0/22:4/16:0/20:0) | neg | 776.5649  | C88 H162 O17 P2 |
| neg_28 | CL(23:0/16:0/20:0/20:4) | neg | 776.5649  | C88 H162 O17 P2 |
| neg_29 | CL(22:6/15:0/20:0/22:0) | neg | 774.5493  | C88 H158 O17 P2 |
| neg_30 | CL(21:0/22:5/18:0/18:1) | neg | 774.5493  | C88 H158 O17 P2 |
| neg_31 | CL(23:0/16:0/18:0/22:6) | neg | 1550.1058 | C88 H159 O17 P2 |
| neg_32 | CL(21:0/18:0/18:0/22:6) | neg | 774.5493  | C88 H158 O17 P2 |
| neg_33 | CL(23:1/16:0/18:1/22:6) | neg | 772.5336  | C88 H154 O17 P2 |
| neg_34 | CL(21:0/16:0/22:5/22:6) | neg | 1568.0589 | C90 H153 O17 P2 |
| neg_35 | CL(23:0/18:1/18:1/22:3) | neg | 789.5727  | C90 H164 O17 P2 |
| neg_36 | CL(23:0/16:0/20:0/22:6) | neg | 788.5649  | C90 H162 O17 P2 |
| neg_37 | CL(20:5/16:0/22:4/24:1) | neg | 791.5414  | C91 H156 O17 P2 |
| neg_38 | CL(17:0/22:5/22:6/22:6) | neg | 1583.9963 | C92 H145 O17 P2 |
| neg_39 | CL(23:0/18:0/20:0/22:6) | neg | 802.5806  | C92 H166 O17 P2 |
| neg_40 | CL(23:0/16:0/22:2/22:6) | neg | 800.5649  | C92 H162 O17 P2 |
| neg_41 | CL(22:6/20:0/22:0/22:6) | neg | 817.5571  | C95 H160 O17 P2 |
| neg_42 | Cer(d18:0/16:0)         | neg | 584.5259  | C35 H70 O5 N1   |
| neg_43 | Cer(d18:2/16:0)         | neg | 580.4946  | C35 H66 O5 N1   |
| neg_44 | Cer(d16:2/19:1)         | neg | 592.4946  | C36 H66 O5 N1   |
| neg_46 | Cer(d16:1/21:0)         | neg | 624.5572  | C38 H74 O5 N1   |
| neg_47 | Cer(d16:2/21:1)         | neg | 620.5259  | C38 H70 O5 N1   |
| neg_49 | Cer(d16:1/22:0+O)       | neg | 608.5623  | C38 H74 O4 N1   |
| neg_50 | Cer(d16:2/23:1)         | neg | 648.5572  | C40 H74 O5 N1   |
| neg_51 | Cer(d18:0/22:0)         | neg | 668.6198  | C41 H82 O5 N1   |

---

## Supplementary Material

---

|        |                        |     |           |                 |
|--------|------------------------|-----|-----------|-----------------|
| neg_52 | Cer(d16:1/24:0)        | neg | 620.5987  | C40 H78 O3 N1   |
| neg_54 | Cer(d19:1/22:0+O)      | neg | 650.6093  | C41 H80 O4 N1   |
| neg_56 | Cer(d19:2/22:1)        | neg | 676.5885  | C42 H78 O5 N1   |
| neg_57 | Cer(d19:2/22:2)        | neg | 674.5729  | C42 H76 O5 N1   |
| neg_58 | Cer(d18:0/24:1)        | neg | 694.6355  | C43 H84 O5 N1   |
| neg_59 | Cer(d16:1/26:2)        | neg | 644.5987  | C42 H78 O3 N1   |
| neg_60 | Cer(d16:2/26:2)        | neg | 688.5885  | C43 H78 O5 N1   |
| neg_61 | Cer(d19:1/24:0)        | neg | 708.6511  | C44 H86 O5 N1   |
| neg_62 | Cer(d19:1/24:1)        | neg | 706.6355  | C44 H84 O5 N1   |
| neg_63 | Cer(d17:1/26:2)        | neg | 704.6198  | C44 H82 O5 N1   |
| neg_64 | Cer(d19:2/24:2)        | neg | 702.6042  | C44 H80 O5 N1   |
| neg_65 | Cer(m18:0/18:1+O)      | neg | 610.5416  | C37 H72 O5 N1   |
| neg_66 | Cer(t16:1/24:1)        | neg | 680.5835  | C41 H78 O6 N1   |
| neg_67 | Cer(t18:0/24:1)        | neg | 710.6304  | C43 H84 O6 N1   |
| neg_68 | Cer(t16:0/26:2)        | neg | 662.6093  | C42 H80 O4 N1   |
| neg_69 | CerG2GNAc1(d18:2/18:1) | neg | 1087.6898 | C56 H99 O18 N2  |
| neg_70 | CerG2GNAc1(d20:2/17:0) | neg | 551.3569  | C57 H102 O18 N2 |
| neg_71 | FA(18:4)               | neg | 275.2017  | O2 H27 C18      |
| neg_72 | FA(20:4)               | neg | 303.2330  | O2 H31 C20      |
| neg_74 | FA(22:4)               | neg | 331.2643  | O2 H35 C22      |
| neg_75 | FA(22:5)               | neg | 329.2486  | O2 H33 C22      |
| neg_76 | FA(22:6)               | neg | 327.2330  | O2 H31 C22      |
| neg_77 | GD1a(m19:1/20:4)       | neg | 926.4735  | C87 H144 O38 N4 |

---

---

|         |                     |     |           |                  |
|---------|---------------------|-----|-----------|------------------|
| neg_78  | GD2(d19:0/22:6)     | neg | 866.4524  | C83 H136 O34 N4  |
| neg_79  | GM3(m18:1/18:1)     | neg | 580.3597  | C59 H104 O20 N2  |
| neg_80  | GM3(m17:1/19:1)     | neg | 580.3597  | C59 H104 O20 N2  |
| neg_81  | GM3(m22:0/24:0)     | neg | 652.4536  | C69 H128 O20 N2  |
| neg_82  | Hex1Cer(d17:0/16:1) | neg | 730.5475  | C40 H76 O10 N1   |
| neg_83  | Hex1Cer(d16:0/18:1) | neg | 744.5631  | C41 H78 O10 N1   |
| neg_84  | Hex1Cer(d21:0/17:1) | neg | 800.6257  | C45 H86 O10 N1   |
| neg_85  | Hex1Cer(d20:1/18:1) | neg | 798.6101  | C45 H84 O10 N1   |
| neg_86  | Hex1Cer(d21:0/18:1) | neg | 814.6414  | C46 H88 O10 N1   |
| neg_87  | Hex1Cer(d21:0/22:4) | neg | 864.6570  | C50 H90 O10 N1   |
| neg_88  | Hex1Cer(t20:1/18:1) | neg | 814.6050  | C45 H84 O11 N1   |
| neg_89  | Hex1Cer(t16:0/22:6) | neg | 806.5424  | C45 H76 O11 N1   |
| neg_90  | Hex1Cer(t17:0/22:6) | neg | 774.5526  | C45 H76 O9 N1    |
| neg_91  | Hex1Cer(t18:0/22:6) | neg | 834.5737  | C47 H80 O11 N1   |
| neg_92  | Hex2Cer(d12:0/16:0) | neg | 778.5322  | C40 H76 O13 N1   |
| neg_93  | Hex2Cer(d22:1/18:1) | neg | 988.6942  | C53 H98 O15 N1   |
| neg_94  | Hex2Cer(d24:1/18:1) | neg | 1016.7255 | C55 H102 O15 N1  |
| neg_95  | Hex2Cer(d24:0/22:6) | neg | 1078.7411 | C60 H104 O15 N1  |
| neg_96  | Hex3Cer(m21:1/22:6) | neg | 1120.7153 | C61 H102 O17 N1  |
| neg_97  | LPE(15:0)           | neg | 438.2626  | C20 H41 O7 N1 P1 |
| neg_98  | LPE(17:0)           | neg | 466.2939  | C22 H45 O7 N1 P1 |
| neg_99  | LPE(17:1)           | neg | 464.2783  | C22 H43 O7 N1 P1 |
| neg_100 | LPE(18:2)           | neg | 476.2783  | C23 H43 O7 N1 P1 |

---

# Supplementary Material

|         |            |     |          |                   |
|---------|------------|-----|----------|-------------------|
| neg_101 | LPE(19:0)  | neg | 494.3252 | C24 H49 O7 N1 P1  |
| neg_102 | LPE(20:0)  | neg | 508.3409 | C25 H51 O7 N1 P1  |
| neg_103 | LPE(20:1)  | neg | 506.3252 | C25 H49 O7 N1 P1  |
| neg_104 | LPE(20:3)  | neg | 502.2939 | C25 H45 O7 N1 P1  |
| neg_105 | LPE(20:5)  | neg | 498.2626 | C25 H41 O7 N1 P1  |
| neg_106 | LPE(22:4)  | neg | 528.3096 | C27 H47 O7 N1 P1  |
| neg_107 | LPEt(18:1) | neg | 463.2830 | C23 H44 O7 N0 P1  |
| neg_108 | LPEt(20:4) | neg | 485.2674 | C25 H42 O7 N0 P1  |
| neg_109 | LPEt(22:6) | neg | 509.2674 | C27 H42 O7 N0 P1  |
| neg_110 | LPG(15:0)  | neg | 469.2572 | C21 H42 O9 N0 P1  |
| neg_111 | LPG(16:0)  | neg | 483.2728 | C22 H44 O9 N0 P1  |
| neg_112 | LPG(16:1)  | neg | 481.2572 | C22 H42 O9 N0 P1  |
| neg_113 | LPG(20:4)  | neg | 531.2728 | C26 H44 O9 N0 P1  |
| neg_114 | LPG(20:5)  | neg | 529.2572 | C26 H42 O9 N0 P1  |
| neg_115 | LPG(22:6)  | neg | 555.2728 | C28 H44 O9 N0 P1  |
| neg_116 | LPI(16:0)  | neg | 571.2889 | C25 H48 O12 N0 P1 |
| neg_117 | LPI(18:0)  | neg | 599.3202 | C27 H52 O12 N0 P1 |
| neg_118 | LPI(18:1)  | neg | 597.3045 | C27 H50 O12 N0 P1 |
| neg_119 | LPI(20:1)  | neg | 625.3358 | C29 H54 O12 N0 P1 |
| neg_122 | LPI(20:4)  | neg | 619.2889 | C29 H48 O12 N0 P1 |
| neg_123 | LPI(20:5)  | neg | 617.2732 | C29 H46 O12 N0 P1 |
| neg_124 | LPI(22:5)  | neg | 645.3045 | C31 H50 O12 N0 P1 |
| neg_125 | LPI(22:6)  | neg | 643.2889 | C31 H48 O12 N0 P1 |

---

|         |               |     |          |                  |
|---------|---------------|-----|----------|------------------|
| neg_126 | LPS(20:4)     | neg | 544.2681 | C26 H43 O9 N1 P1 |
| neg_127 | LPS(22:4)     | neg | 572.2994 | C28 H47 O9 N1 P1 |
| neg_128 | LPS(22:5)     | neg | 570.2837 | C28 H45 O9 N1 P1 |
| neg_129 | LdMePE(14:0)  | neg | 452.2783 | C21 H43 O7 N1 P1 |
| neg_130 | LdMePE(14:0e) | neg | 438.2990 | C21 H45 O6 N1 P1 |
| neg_131 | LdMePE(15:0)  | neg | 466.2939 | C22 H45 O7 N1 P1 |
| neg_132 | LdMePE(16:0)  | neg | 480.3096 | C23 H47 O7 N1 P1 |
| neg_133 | LdMePE(16:0e) | neg | 466.3303 | C23 H49 O6 N1 P1 |
| neg_134 | LdMePE(16:1)  | neg | 478.2939 | C23 H45 O7 N1 P1 |
| neg_135 | LdMePE(16:1e) | neg | 464.3147 | C23 H47 O6 N1 P1 |
| neg_136 | LdMePE(17:0)  | neg | 494.3252 | C24 H49 O7 N1 P1 |
| neg_137 | LdMePE(17:1)  | neg | 492.3096 | C24 H47 O7 N1 P1 |
| neg_138 | LdMePE(18:0)  | neg | 508.3409 | C25 H51 O7 N1 P1 |
| neg_139 | LdMePE(18:0e) | neg | 494.3616 | C25 H53 O6 N1 P1 |
| neg_140 | LdMePE(18:1e) | neg | 492.3460 | C25 H51 O6 N1 P1 |
| neg_141 | LdMePE(18:2)  | neg | 504.3096 | C25 H47 O7 N1 P1 |
| neg_142 | LdMePE(18:3)  | neg | 502.2939 | C25 H45 O7 N1 P1 |
| neg_143 | LdMePE(19:0)  | neg | 522.3565 | C26 H53 O7 N1 P1 |
| neg_144 | LdMePE(19:1)  | neg | 520.3409 | C26 H51 O7 N1 P1 |
| neg_145 | LdMePE(20:0)  | neg | 536.3722 | C27 H55 O7 N1 P1 |
| neg_146 | LdMePE(20:0e) | neg | 522.3929 | C27 H57 O6 N1 P1 |
| neg_147 | LdMePE(20:1)  | neg | 534.3565 | C27 H53 O7 N1 P1 |
| neg_148 | LdMePE(20:2)  | neg | 532.3409 | C27 H51 O7 N1 P1 |

---

## Supplementary Material

---

|         |                  |     |          |                  |
|---------|------------------|-----|----------|------------------|
| neg_149 | LdMePE(20:3)     | neg | 530.3252 | C27 H49 O7 N1 P1 |
| neg_150 | LdMePE(20:4)     | neg | 528.3096 | C27 H47 O7 N1 P1 |
| neg_151 | LdMePE(20:5)     | neg | 526.2939 | C27 H45 O7 N1 P1 |
| neg_152 | LdMePE(22:4)     | neg | 556.3409 | C29 H51 O7 N1 P1 |
| neg_153 | LdMePE(22:5)     | neg | 554.3252 | C29 H49 O7 N1 P1 |
| neg_154 | LdMePE(22:6)     | neg | 552.3096 | C29 H47 O7 N1 P1 |
| neg_155 | LdMePE(24:1)     | neg | 590.4191 | C31 H61 O7 N1 P1 |
| neg_156 | MGDG(12:0e/15:0) | neg | 705.5158 | C38 H73 O11      |
| neg_157 | MGDG(12:0e/16:0) | neg | 719.5315 | C39 H75 O11      |
| neg_158 | MGDG(14:0e/15:0) | neg | 733.5471 | C40 H77 O11      |
| neg_159 | MGDG(14:0e/16:0) | neg | 747.5628 | C41 H79 O11      |
| neg_160 | MGDG(14:0e/16:1) | neg | 745.5471 | C41 H77 O11      |
| neg_161 | MGDG(16:0e/15:0) | neg | 761.5784 | C42 H81 O11      |
| neg_162 | MGDG(12:0e/20:0) | neg | 775.5941 | C43 H83 O11      |
| neg_164 | MGDG(14:1e/18:1) | neg | 771.5628 | C43 H79 O11      |
| neg_165 | MGDG(16:0e/18:0) | neg | 803.6254 | C45 H87 O11      |
| neg_166 | MGDG(16:0e/18:1) | neg | 801.6097 | C45 H85 O11      |
| neg_167 | MGDG(18:1/16:0p) | neg | 799.5941 | C45 H83 O11      |
| neg_168 | MGDG(18:1e/16:1) | neg | 799.5941 | C45 H83 O11      |
| neg_169 | MGDG(18:0e/17:1) | neg | 815.6254 | C46 H87 O11      |
| neg_170 | MGDG(18:0e/18:1) | neg | 815.6254 | C46 H87 O11      |
| neg_171 | MGDG(12:0e/24:1) | neg | 829.6410 | C47 H89 O11      |
| neg_172 | MGDG(18:1e/18:1) | neg | 827.6254 | C47 H87 O11      |

---

---

|         |                      |     |          |                 |
|---------|----------------------|-----|----------|-----------------|
| neg_173 | MGDG(20:3e/16:0)     | neg | 825.6097 | C47 H85 O11     |
| neg_174 | MGDG(20:0e/17:1)     | neg | 843.6567 | C48 H91 O11     |
| neg_175 | MGDG(20:2e/17:1)     | neg | 839.6254 | C48 H87 O11     |
| neg_176 | MGDG(16:0/21:5)      | neg | 849.5734 | C48 H81 O12     |
| neg_177 | MGDG(20:1e/18:0)     | neg | 857.6723 | C49 H93 O11     |
| neg_178 | MGDG(20:1e/18:1)     | neg | 855.6567 | C49 H91 O11     |
| neg_179 | MGDG(20:3e/18:0)     | neg | 853.6410 | C49 H89 O11     |
| neg_180 | MGDG(20:4e/18:1)     | neg | 789.5886 | C47 H81 O9      |
| neg_182 | MGMG(28:0)           | neg | 719.5315 | C39 H75 O11     |
| neg_183 | MLCL(14:2/14:0/14:0) | neg | 512.3014 | C51 H94 O16 P2  |
| neg_184 | MLCL(14:2/15:0/15:0) | neg | 526.3171 | C53 H98 O16 P2  |
| neg_185 | MLCL(10:4/16:1/18:1) | neg | 522.2858 | C53 H90 O16 P2  |
| neg_186 | MLCL(10:1/15:1/20:3) | neg | 530.3014 | C54 H94 O16 P2  |
| neg_187 | MLCL(14:2/16:0/16:0) | neg | 540.3327 | C55 H102 O16 P2 |
| neg_188 | MLCL(14:2/16:1/16:1) | neg | 538.3171 | C55 H98 O16 P2  |
| neg_190 | MLCL(11:2/16:1/22:4) | neg | 556.3171 | C58 H98 O16 P2  |
| neg_191 | MLCL(14:2/18:0/18:0) | neg | 568.3640 | C59 H110 O16 P2 |
| neg_192 | MLCL(14:2/18:1/18:1) | neg | 566.3484 | C59 H106 O16 P2 |
| neg_193 | MLCL(14:2/18:2/18:2) | neg | 564.3327 | C59 H102 O16 P2 |
| neg_194 | MLCL(18:2/16:1/18:1) | neg | 580.3640 | C61 H110 O16 P2 |
| neg_195 | MLCL(11:3/20:4/22:6) | neg | 578.3014 | C62 H94 O16 P2  |
| neg_196 | MLCL(14:2/20:4/20:4) | neg | 588.3327 | C63 H102 O16 P2 |
| neg_197 | MLCL(14:2/20:0/20:0) | neg | 596.3953 | C63 H118 O16 P2 |

---

# Supplementary Material

|         |                      |     |          |                  |
|---------|----------------------|-----|----------|------------------|
| neg_198 | MLCL(14:2/20:1/20:1) | neg | 594.3797 | C63 H114 O16 P2  |
| neg_199 | MLCL(20:2/14:0/20:4) | neg | 592.3640 | C63 H110 O16 P2  |
| neg_200 | MLCL(14:2/20:3/20:3) | neg | 590.3484 | C63 H106 O16 P2  |
| neg_201 | MLCL(14:2/22:4/22:4) | neg | 616.3640 | C67 H110 O16 P2  |
| neg_202 | MLCL(14:2/22:5/22:5) | neg | 614.3484 | C67 H106 O16 P2  |
| neg_203 | MLCL(14:2/22:6/22:6) | neg | 612.3327 | C67 H102 O16 P2  |
| neg_204 | MLCL(14:2/22:0/22:0) | neg | 624.4266 | C67 H126 O16 P2  |
| neg_206 | MLCL(18:4/20:4/22:6) | neg | 626.3484 | C69 H106 O16 P2  |
| neg_207 | MLCL(24:0/18:1/20:1) | neg | 652.4579 | C71 H134 O16 P2  |
| neg_208 | MLCL(14:2/24:1/24:1) | neg | 650.4423 | C71 H130 O16 P2  |
| neg_209 | OAHA(18:1/18:0)      | neg | 563.5045 | C36 H67 O4       |
| neg_210 | OAHA(18:1/20:3)      | neg | 585.4888 | C38 H65 O4       |
| neg_211 | OAHA(20:4/20:3)      | neg | 607.4732 | C40 H63 O4       |
| neg_212 | OAHA(20:4/22:6)      | neg | 629.4575 | C42 H61 O4       |
| neg_213 | OAHA(22:5/22:4)      | neg | 659.5045 | C44 H67 O4       |
| neg_214 | PC(14:0e/14:0)       | neg | 708.5185 | C37 H75 O9 N1 P1 |
| neg_215 | PC(14:1e/14:0)       | neg | 706.5028 | C37 H73 O9 N1 P1 |
| neg_216 | PC(14:0e/15:0)       | neg | 722.5341 | C38 H77 O9 N1 P1 |
| neg_217 | PC(14:1e/15:0)       | neg | 720.5185 | C38 H75 O9 N1 P1 |
| neg_218 | PC(16:0e/14:0)       | neg | 736.5498 | C39 H79 O9 N1 P1 |
| neg_219 | PC(16:1e/14:0)       | neg | 734.5341 | C39 H77 O9 N1 P1 |
| neg_220 | PC(16:0e/15:0)       | neg | 750.5654 | C40 H81 O9 N1 P1 |
| neg_222 | PC(16:0e/16:1)       | neg | 762.5654 | C41 H81 O9 N1 P1 |



---

|         |                |     |          |                      |
|---------|----------------|-----|----------|----------------------|
| neg_224 | PC(17:1/16:1)  | neg | 788.5447 | C42 H79 O10 N1 P1    |
| neg_225 | PC(16:1e/17:1) | neg | 774.5654 | C42 H81 O9 N1 P1     |
| neg_226 | PC(16:0e/18:1) | neg | 790.5967 | C43 H85 O9 N1 P1     |
| neg_227 | PC(14:0/20:4)  | neg | 798.5291 | C43 H77 O10 N1 P1    |
| neg_228 | PC(14:0e/20:5) | neg | 782.5341 | C43 H77 O9 N1 P1     |
| neg_229 | PC(17:0/18:1)  | neg | 818.5917 | C44 H85 O10 N1 P1    |
| neg_230 | PC(17:1/18:1)  | neg | 816.5760 | C44 H83 O10 N1 P1    |
| neg_231 | PC(18:2e/17:1) | neg | 800.5811 | C44 H83 O9 N1 P1     |
| neg_232 | PC(20:1e/16:0) | neg | 818.6280 | C45 H89 O9 N1 P1     |
| neg_233 | PC(18:1e/18:1) | neg | 756.5913 | C43 H83 O7 N1 P1     |
| neg_234 | PC(18:2e/18:1) | neg | 814.5967 | C45 H85 O9 N1 P1     |
| neg_235 | PC(14:0e/22:4) | neg | 812.5811 | C45 H83 O9 N1 P1     |
| neg_236 | PC(16:0e/20:5) | neg | 810.5654 | C45 H81 O9 N1 P1     |
| neg_237 | PC(16:1e/20:5) | neg | 808.5498 | C45 H79 O9 N1 P1     |
| neg_238 | PC(19:0/18:1)  | neg | 846.6230 | C46 H89 O10 N1 P1    |
| neg_239 | PC(19:1/18:1)  | neg | 844.6073 | C46 H87 O10 N1 P1    |
| neg_241 | PC(18:2e/20:4) | neg | 826.5523 | C46 H82 O7 N1 P1 Cl1 |
| neg_242 | PC(18:1e/20:5) | neg | 836.5811 | C47 H83 O9 N1 P1     |
| neg_243 | PC(16:1e/22:5) | neg | 836.5811 | C47 H83 O9 N1 P1     |
| neg_244 | PC(17:0/22:4)  | neg | 868.6073 | C48 H87 O10 N1 P1    |
| neg_245 | PC(19:0/20:5)  | neg | 866.5917 | C48 H85 O10 N1 P1    |
| neg_246 | PC(16:0/24:1)  | neg | 888.6699 | C49 H95 O10 N1 P1    |
| neg_247 | PC(18:1/22:0)  | neg | 888.6699 | C49 H95 O10 N1 P1    |

---

## Supplementary Material

---

|         |                |     |           |                   |
|---------|----------------|-----|-----------|-------------------|
| neg_248 | PC(18:1/22:1)  | neg | 886.6543  | C49 H93 O10 N1 P1 |
| neg_249 | PC(20:0/20:5)  | neg | 880.6073  | C49 H87 O10 N1 P1 |
| neg_250 | PC(18:0e/22:5) | neg | 866.6280  | C49 H89 O9 N1 P1  |
| neg_251 | PC(18:1e/22:5) | neg | 864.6124  | C49 H87 O9 N1 P1  |
| neg_252 | PC(20:1/22:5)  | neg | 906.6230  | C51 H89 O10 N1 P1 |
| neg_253 | PC(24:0/20:5)  | neg | 936.6699  | C53 H95 O10 N1 P1 |
| neg_255 | PC(22:4/22:5)  | neg | 928.6073  | C53 H87 O10 N1 P1 |
| neg_256 | PC(24:0/22:6)  | neg | 962.6856  | C55 H97 O10 N1 P1 |
| neg_257 | PC(30:1/17:1)  | neg | 924.7427  | C54 H103 O8 N1 P1 |
| neg_258 | PC(32:1/17:1)  | neg | 952.7740  | C56 H107 O8 N1 P1 |
| neg_259 | PC(30:1/20:4)  | neg | 960.7427  | C57 H103 O8 N1 P1 |
| neg_260 | PC(30:1/20:5)  | neg | 958.7270  | C57 H101 O8 N1 P1 |
| neg_261 | PC(28:1/22:6)  | neg | 956.7114  | C57 H99 O8 N1 P1  |
| neg_262 | PC(29:1/22:6)  | neg | 970.7270  | C58 H101 O8 N1 P1 |
| neg_263 | PC(30:1/22:4)  | neg | 988.7740  | C59 H107 O8 N1 P1 |
| neg_264 | PC(32:1/20:4)  | neg | 988.7740  | C59 H107 O8 N1 P1 |
| neg_265 | PC(30:1/22:5)  | neg | 986.7583  | C59 H105 O8 N1 P1 |
| neg_266 | PC(32:1/20:5)  | neg | 986.7583  | C59 H105 O8 N1 P1 |
| neg_267 | PC(30:1/22:6)  | neg | 984.7427  | C59 H103 O8 N1 P1 |
| neg_268 | PC(31:1/22:6)  | neg | 998.7583  | C60 H105 O8 N1 P1 |
| neg_269 | PC(32:1/22:4)  | neg | 1016.8053 | C61 H111 O8 N1 P1 |
| neg_270 | PC(34:1/20:4)  | neg | 1016.8053 | C61 H111 O8 N1 P1 |
| neg_271 | PC(32:1/22:5)  | neg | 1014.7896 | C61 H109 O8 N1 P1 |

---

---

|         |                |     |           |                   |
|---------|----------------|-----|-----------|-------------------|
| neg_273 | PC(32:1/22:6)  | neg | 1012.7740 | C61 H107 O8 N1 P1 |
| neg_274 | PC(33:1/22:6)  | neg | 1026.7896 | C62 H109 O8 N1 P1 |
| neg_275 | PC(34:1/22:6)  | neg | 1040.8053 | C63 H111 O8 N1 P1 |
| neg_278 | PE(16:1/14:0)  | neg | 660.4610  | C35 H67 O8 N1 P1  |
| neg_280 | PE(14:1e/17:1) | neg | 658.4817  | C36 H69 O7 N1 P1  |
| neg_281 | PE(16:0/16:0)  | neg | 690.5079  | C37 H73 O8 N1 P1  |
| neg_282 | PE(16:1e/16:0) | neg | 674.5130  | C37 H73 O7 N1 P1  |
| neg_283 | PE(14:1e/18:1) | neg | 672.4974  | C37 H71 O7 N1 P1  |
| neg_284 | PE(16:1e/16:1) | neg | 672.4974  | C37 H71 O7 N1 P1  |
| neg_285 | PE(17:1/16:0)  | neg | 702.5079  | C38 H73 O8 N1 P1  |
| neg_287 | PE(18:0/16:0)  | neg | 718.5392  | C39 H77 O8 N1 P1  |
| neg_288 | PE(18:0e/16:1) | neg | 702.5443  | C39 H77 O7 N1 P1  |
| neg_290 | PE(16:0/18:2)  | neg | 714.5079  | C39 H73 O8 N1 P1  |
| neg_291 | PE(18:1e/16:1) | neg | 700.5287  | C39 H75 O7 N1 P1  |
| neg_292 | PE(18:2e/16:1) | neg | 698.5130  | C39 H73 O7 N1 P1  |
| neg_293 | PE(14:0/20:4)  | neg | 710.4766  | C39 H69 O8 N1 P1  |
| neg_294 | PE(14:1e/20:4) | neg | 694.4817  | C39 H69 O7 N1 P1  |
| neg_295 | PE(14:1e/20:5) | neg | 692.4661  | C39 H67 O7 N1 P1  |
| neg_296 | PE(17:0/18:1)  | neg | 730.5392  | C40 H77 O8 N1 P1  |
| neg_297 | PE(17:1/18:1)  | neg | 728.5236  | C40 H75 O8 N1 P1  |
| neg_298 | PE(18:2e/17:1) | neg | 712.5287  | C40 H75 O7 N1 P1  |
| neg_299 | PE(18:3e/17:1) | neg | 710.5130  | C40 H73 O7 N1 P1  |
| neg_300 | PE(16:0/20:1)  | neg | 744.5549  | C41 H79 O8 N1 P1  |

---

# Supplementary Material

|         |                |     |          |                  |
|---------|----------------|-----|----------|------------------|
| neg_301 | PE(18:0e/18:1) | neg | 730.5756 | C41 H81 O7 N1 P1 |
| neg_302 | PE(18:1/18:1)  | neg | 742.5392 | C41 H77 O8 N1 P1 |
| neg_303 | PE(18:0/18:2)  | neg | 742.5392 | C41 H77 O8 N1 P1 |
| neg_304 | PE(18:1/18:2)  | neg | 740.5236 | C41 H75 O8 N1 P1 |
| neg_305 | PE(16:0/20:3)  | neg | 740.5236 | C41 H75 O8 N1 P1 |
| neg_306 | PE(18:2e/18:1) | neg | 726.5443 | C41 H77 O7 N1 P1 |
| neg_307 | PE(18:1e/18:2) | neg | 726.5443 | C41 H77 O7 N1 P1 |
| neg_308 | PE(16:0e/20:4) | neg | 724.5287 | C41 H75 O7 N1 P1 |
| neg_309 | PE(16:1/20:4)  | neg | 736.4923 | C41 H71 O8 N1 P1 |
| neg_310 | PE(14:0/22:6)  | neg | 734.4766 | C41 H69 O8 N1 P1 |
| neg_311 | PE(16:2e/20:4) | neg | 720.4974 | C41 H71 O7 N1 P1 |
| neg_312 | PE(16:1e/20:5) | neg | 720.4974 | C41 H71 O7 N1 P1 |
| neg_314 | PE(19:0/18:1)  | neg | 758.5705 | C42 H81 O8 N1 P1 |
| neg_315 | PE(20:1e/17:1) | neg | 742.5756 | C42 H81 O7 N1 P1 |
| neg_316 | PE(17:1/20:2)  | neg | 754.5392 | C42 H77 O8 N1 P1 |
| neg_317 | PE(20:2e/17:1) | neg | 740.5600 | C42 H79 O7 N1 P1 |
| neg_318 | PE(17:0/20:4)  | neg | 752.5236 | C42 H75 O8 N1 P1 |
| neg_319 | PE(17:0/20:5)  | neg | 750.5079 | C42 H73 O8 N1 P1 |
| neg_321 | PE(15:0/22:6)  | neg | 748.4923 | C42 H71 O8 N1 P1 |
| neg_322 | PE(18:0/20:1)  | neg | 772.5862 | C43 H83 O8 N1 P1 |
| neg_323 | PE(18:1e/20:0) | neg | 758.6069 | C43 H85 O7 N1 P1 |
| neg_324 | PE(20:1e/18:1) | neg | 756.5913 | C43 H83 O7 N1 P1 |
| neg_325 | PE(18:0/20:3)  | neg | 768.5549 | C43 H79 O8 N1 P1 |

---

|         |                |     |          |                  |
|---------|----------------|-----|----------|------------------|
| neg_326 | PE(20:2e/18:1) | neg | 754.5756 | C43 H81 O7 N1 P1 |
| neg_327 | PE(16:0/22:4)  | neg | 766.5392 | C43 H77 O8 N1 P1 |
| neg_328 | PE(18:0e/20:4) | neg | 752.5600 | C43 H79 O7 N1 P1 |
| neg_329 | PE(18:1/20:4)  | neg | 764.5236 | C43 H75 O8 N1 P1 |
| neg_330 | PE(16:0/22:5)  | neg | 764.5236 | C43 H75 O8 N1 P1 |
| neg_331 | PE(16:1e/22:4) | neg | 750.5443 | C43 H77 O7 N1 P1 |
| neg_332 | PE(18:1e/20:4) | neg | 750.5443 | C43 H77 O7 N1 P1 |
| neg_333 | PE(16:1/22:5)  | neg | 762.5079 | C43 H73 O8 N1 P1 |
| neg_334 | PE(18:1/20:5)  | neg | 762.5079 | C43 H73 O8 N1 P1 |
| neg_335 | PE(18:1e/20:5) | neg | 748.5287 | C43 H75 O7 N1 P1 |
| neg_336 | PE(16:1e/22:5) | neg | 748.5287 | C43 H75 O7 N1 P1 |
| neg_337 | PE(18:2e/20:5) | neg | 746.5130 | C43 H73 O7 N1 P1 |
| neg_339 | PE(16:2e/22:6) | neg | 744.4974 | C43 H71 O7 N1 P1 |
| neg_340 | PE(17:1/22:2)  | neg | 782.5705 | C44 H81 O8 N1 P1 |
| neg_342 | PE(19:0/20:4)  | neg | 780.5549 | C44 H79 O8 N1 P1 |
| neg_343 | PE(17:0/22:6)  | neg | 776.5236 | C44 H75 O8 N1 P1 |
| neg_344 | PE(17:1/22:6)  | neg | 774.5079 | C44 H73 O8 N1 P1 |
| neg_345 | PE(18:4/22:6)  | neg | 782.4766 | C45 H69 O8 N1 P1 |
| neg_346 | PE(18:1/22:2)  | neg | 796.5862 | C45 H83 O8 N1 P1 |
| neg_347 | PE(18:1/22:3)  | neg | 794.5705 | C45 H81 O8 N1 P1 |
| neg_348 | PE(18:0/22:4)  | neg | 794.5705 | C45 H81 O8 N1 P1 |
| neg_349 | PE(20:0/20:4)  | neg | 794.5705 | C45 H81 O8 N1 P1 |
| neg_350 | PE(18:0e/22:4) | neg | 780.5913 | C45 H83 O7 N1 P1 |

---

## Supplementary Material

---

|         |                 |     |          |                  |
|---------|-----------------|-----|----------|------------------|
| neg_351 | PE(18:1e/22:4)  | neg | 778.5756 | C45 H81 O7 N1 P1 |
| neg_352 | PE(18:1/22:5)   | neg | 790.5392 | C45 H77 O8 N1 P1 |
| neg_353 | PE(18:0e/22:6)  | neg | 776.5600 | C45 H79 O7 N1 P1 |
| neg_354 | PE(18:1e/22:5)  | neg | 776.5600 | C45 H79 O7 N1 P1 |
| neg_355 | PE(18:2e/22:5)  | neg | 774.5443 | C45 H77 O7 N1 P1 |
| neg_356 | PE(20:4/20:4)   | neg | 786.5079 | C45 H73 O8 N1 P1 |
| neg_357 | PE(18:2e/22:6)  | neg | 772.5287 | C45 H75 O7 N1 P1 |
| neg_358 | PE(18:3e/22:6)  | neg | 770.5130 | C45 H73 O7 N1 P1 |
| neg_359 | PE(19:0/22:6)   | neg | 804.5549 | C46 H79 O8 N1 P1 |
| neg_360 | PE(19:1/22:6)   | neg | 802.5392 | C46 H77 O8 N1 P1 |
| neg_361 | PE(20:0/22:5)   | neg | 820.5862 | C47 H83 O8 N1 P1 |
| neg_362 | PE(20:0/22:6)   | neg | 818.5705 | C47 H81 O8 N1 P1 |
| neg_363 | PE(20:0e/22:6)  | neg | 804.5913 | C47 H83 O7 N1 P1 |
| neg_364 | PE(20:1/22:6)   | neg | 816.5549 | C47 H79 O8 N1 P1 |
| neg_365 | PE(20:1e/22:6)  | neg | 802.5756 | C47 H81 O7 N1 P1 |
| neg_366 | PE(20:2/22:6)   | neg | 814.5392 | C47 H77 O8 N1 P1 |
| neg_367 | PE(20:2e/22:6)  | neg | 800.5600 | C47 H79 O7 N1 P1 |
| neg_368 | PE(22:5/20:4)   | neg | 812.5236 | C47 H75 O8 N1 P1 |
| neg_370 | PEt(16:0/18:1)  | neg | 701.5127 | C39 H74 O8 N0 P1 |
| neg_371 | PEt(12:0e/22:6) | neg | 677.4552 | C39 H66 O7 N0 P1 |
| neg_372 | PEt(18:0/18:1)  | neg | 729.5440 | C41 H78 O8 N0 P1 |
| neg_373 | PEt(18:1/18:1)  | neg | 727.5283 | C41 H76 O8 N0 P1 |
| neg_374 | PEt(16:0e/20:4) | neg | 709.5178 | C41 H74 O7 N0 P1 |

---

---

|         |                 |     |          |                   |
|---------|-----------------|-----|----------|-------------------|
| neg_375 | PEt(16:0/20:5)  | neg | 721.4814 | C41 H70 O8 N0 P1  |
| neg_376 | PEt(16:1e/20:4) | neg | 707.5021 | C41 H72 O7 N0 P1  |
| neg_378 | PEt(16:1/22:6)  | neg | 745.4814 | C43 H70 O8 N0 P1  |
| neg_380 | PEt(18:1/22:6)  | neg | 773.5127 | C45 H74 O8 N0 P1  |
| neg_382 | PEt(20:5/22:6)  | neg | 793.4814 | C47 H70 O8 N0 P1  |
| neg_383 | PEt(22:6/22:6)  | neg | 819.4970 | C49 H72 O8 N0 P1  |
| neg_384 | PEt(22:2/22:6)  | neg | 827.5596 | C49 H80 O8 N0 P1  |
| neg_385 | PG(15:0/13:0)   | neg | 665.4399 | C34 H66 O10 N0 P1 |
| neg_386 | PG(15:0/15:0)   | neg | 693.4712 | C36 H70 O10 N0 P1 |
| neg_387 | PG(15:0/16:0)   | neg | 707.4869 | C37 H72 O10 N0 P1 |
| neg_388 | PG(15:0/16:1)   | neg | 705.4712 | C37 H70 O10 N0 P1 |
| neg_389 | PG(16:0/16:1)   | neg | 719.4869 | C38 H72 O10 N0 P1 |
| neg_390 | PG(12:1e/20:4)  | neg | 697.4450 | C38 H66 O9 N0 P1  |
| neg_392 | PG(17:1/16:1)   | neg | 731.4869 | C39 H72 O10 N0 P1 |
| neg_393 | PG(16:0/18:1)   | neg | 747.5182 | C40 H76 O10 N0 P1 |
| neg_395 | PG(17:1/18:1)   | neg | 759.5182 | C41 H76 O10 N0 P1 |
| neg_396 | PG(18:0/18:1)   | neg | 775.5495 | C42 H80 O10 N0 P1 |
| neg_397 | PG(18:1/18:1)   | neg | 773.5338 | C42 H78 O10 N0 P1 |
| neg_398 | PG(18:1/18:2)   | neg | 771.5182 | C42 H76 O10 N0 P1 |
| neg_399 | PG(16:0/20:4)   | neg | 769.5025 | C42 H74 O10 N0 P1 |
| neg_400 | PG(16:0/20:5)   | neg | 767.4869 | C42 H72 O10 N0 P1 |
| neg_401 | PG(16:1/20:4)   | neg | 767.4869 | C42 H72 O10 N0 P1 |
| neg_402 | PG(16:1/20:5)   | neg | 765.4712 | C42 H70 O10 N0 P1 |

---

## Supplementary Material

---

|         |                |     |          |                   |
|---------|----------------|-----|----------|-------------------|
| neg_403 | PG(14:0/22:6)  | neg | 765.4712 | C42 H70 O10 N0 P1 |
| neg_404 | PG(16:2e/20:4) | neg | 751.4919 | C42 H72 O9 N0 P1  |
| neg_406 | PG(18:0/20:4)  | neg | 797.5338 | C44 H78 O10 N0 P1 |
| neg_407 | PG(18:1/20:4)  | neg | 795.5182 | C44 H76 O10 N0 P1 |
| neg_408 | PG(16:1/22:5)  | neg | 793.5025 | C44 H74 O10 N0 P1 |
| neg_409 | PG(18:1/20:5)  | neg | 793.5025 | C44 H74 O10 N0 P1 |
| neg_410 | PG(16:0/22:6)  | neg | 793.5025 | C44 H74 O10 N0 P1 |
| neg_411 | PG(16:0e/22:6) | neg | 779.5232 | C44 H76 O9 N0 P1  |
| neg_412 | PG(16:1/22:6)  | neg | 791.4869 | C44 H72 O10 N0 P1 |
| neg_413 | PG(16:1e/22:6) | neg | 777.5076 | C44 H74 O9 N0 P1  |
| neg_414 | PG(18:0/22:6)  | neg | 821.5338 | C46 H78 O10 N0 P1 |
| neg_416 | PG(18:2e/22:6) | neg | 803.5232 | C46 H76 O9 N0 P1  |
| neg_417 | PG(20:4/22:6)  | neg | 841.5025 | C48 H74 O10 N0 P1 |
| neg_418 | PG(20:5/22:6)  | neg | 839.4869 | C48 H72 O10 N0 P1 |
| neg_419 | PG(22:5/22:5)  | neg | 869.5338 | C50 H78 O10 N0 P1 |
| neg_420 | PG(22:5/22:6)  | neg | 867.5182 | C50 H76 O10 N0 P1 |
| neg_421 | PG(22:6/22:6)  | neg | 865.5025 | C50 H74 O10 N0 P1 |
| neg_422 | PG(28:1/20:5)  | neg | 933.6590 | C54 H94 O10 N0 P1 |
| neg_423 | PI(16:0/16:1)  | neg | 807.5029 | C41 H76 O13 N0 P1 |
| neg_424 | PI(16:0/18:1)  | neg | 835.5342 | C43 H80 O13 N0 P1 |
| neg_425 | PI(16:1/18:1)  | neg | 833.5186 | C43 H78 O13 N0 P1 |
| neg_426 | PI(14:0/20:4)  | neg | 829.4873 | C43 H74 O13 N0 P1 |
| neg_427 | PI(18:0/18:1)  | neg | 863.5655 | C45 H84 O13 N0 P1 |

---



---

|         |                |     |          |                   |
|---------|----------------|-----|----------|-------------------|
| neg_428 | PI(18:1/18:1)  | neg | 861.5499 | C45 H82 O13 N0 P1 |
| neg_429 | PI(16:0/20:4)  | neg | 857.5186 | C45 H78 O13 N0 P1 |
| neg_430 | PI(16:1/20:4)  | neg | 855.5029 | C45 H76 O13 N0 P1 |
| neg_431 | PI(16:0/20:5)  | neg | 855.5029 | C45 H76 O13 N0 P1 |
| neg_432 | PI(16:1e/20:4) | neg | 841.5236 | C45 H78 O12 N0 P1 |
| neg_433 | PI(16:1/20:5)  | neg | 853.4873 | C45 H74 O13 N0 P1 |
| neg_434 | PI(14:0/22:6)  | neg | 853.4873 | C45 H74 O13 N0 P1 |
| neg_435 | PI(17:0/20:4)  | neg | 871.5342 | C46 H80 O13 N0 P1 |
| neg_436 | PI(17:1/20:4)  | neg | 869.5186 | C46 H78 O13 N0 P1 |
| neg_437 | PI(15:0/22:6)  | neg | 867.5029 | C46 H76 O13 N0 P1 |
| neg_438 | PI(18:1/20:4)  | neg | 883.5342 | C47 H80 O13 N0 P1 |
| neg_439 | PI(18:0/20:5)  | neg | 883.5342 | C47 H80 O13 N0 P1 |
| neg_440 | PI(16:1/22:5)  | neg | 881.5186 | C47 H78 O13 N0 P1 |
| neg_442 | PI(16:0e/22:6) | neg | 867.5393 | C47 H80 O12 N0 P1 |
| neg_443 | PI(19:0/20:4)  | neg | 899.5655 | C48 H84 O13 N0 P1 |
| neg_444 | PI(17:0/22:6)  | neg | 895.5342 | C48 H80 O13 N0 P1 |
| neg_445 | PI(17:1/22:6)  | neg | 893.5186 | C48 H78 O13 N0 P1 |
| neg_446 | PI(18:0/22:4)  | neg | 913.5812 | C49 H86 O13 N0 P1 |
| neg_447 | PI(18:0/22:5)  | neg | 911.5655 | C49 H84 O13 N0 P1 |
| neg_448 | PI(18:1/22:5)  | neg | 909.5499 | C49 H82 O13 N0 P1 |
| neg_450 | PI(18:3/22:6)  | neg | 903.5029 | C49 H76 O13 N0 P1 |
| neg_451 | PI(19:0/22:6)  | neg | 923.5655 | C50 H84 O13 N0 P1 |
| neg_452 | PI(20:5/22:6)  | neg | 927.5029 | C51 H76 O13 N0 P1 |

---

## Supplementary Material

---

|         |                  |     |           |                   |
|---------|------------------|-----|-----------|-------------------|
| neg_453 | PI(22:5/20:4)    | neg | 931.5342  | C51 H80 O13 N0 P1 |
| neg_454 | PI(22:4/22:6)    | neg | 957.5499  | C53 H82 O13 N0 P1 |
| neg_455 | PI(22:5/22:6)    | neg | 955.5342  | C53 H80 O13 N0 P1 |
| neg_457 | PIP2(20:4e/19:0) | neg | 1045.5189 | C48 H88 O18 N0 P3 |
| neg_458 | PMe(16:1/16:1)   | neg | 657.4501  | C36 H66 O8 N0 P1  |
| neg_459 | PMe(16:1/18:1)   | neg | 685.4814  | C38 H70 O8 N0 P1  |
| neg_460 | PS(16:0/18:1)    | neg | 760.5134  | C40 H75 O10 N1 P1 |
| neg_461 | PS(16:1/18:2)    | neg | 756.4821  | C40 H71 O10 N1 P1 |
| neg_462 | PS(16:1/18:3)    | neg | 754.4665  | C40 H69 O10 N1 P1 |
| neg_463 | PS(18:3e/17:1)   | neg | 754.5028  | C41 H73 O9 N1 P1  |
| neg_464 | PS(18:1/18:1)    | neg | 786.5291  | C42 H77 O10 N1 P1 |
| neg_465 | PS(18:1/18:2)    | neg | 784.5134  | C42 H75 O10 N1 P1 |
| neg_466 | PS(16:0/20:4)    | neg | 782.4978  | C42 H73 O10 N1 P1 |
| neg_467 | PS(14:0/22:6)    | neg | 778.4665  | C42 H69 O10 N1 P1 |
| neg_468 | PS(18:0/19:0)    | neg | 804.5760  | C43 H83 O10 N1 P1 |
| neg_469 | PS(19:0/18:1)    | neg | 802.5604  | C43 H81 O10 N1 P1 |
| neg_470 | PS(20:3e/17:1)   | neg | 782.5341  | C43 H77 O9 N1 P1  |
| neg_471 | PS(20:4e/17:1)   | neg | 780.5185  | C43 H75 O9 N1 P1  |
| neg_472 | PS(18:0/20:0)    | neg | 818.5917  | C44 H85 O10 N1 P1 |
| neg_474 | PS(18:1/20:2)    | neg | 812.5447  | C44 H79 O10 N1 P1 |
| neg_475 | PS(18:0/20:4)    | neg | 810.5291  | C44 H77 O10 N1 P1 |
| neg_476 | PS(18:0e/20:4)   | neg | 796.5498  | C44 H79 O9 N1 P1  |
| neg_477 | PS(20:3e/18:1)   | neg | 796.5498  | C44 H79 O9 N1 P1  |

---

---

|         |                |     |          |                   |
|---------|----------------|-----|----------|-------------------|
| neg_478 | PS(16:0/22:5)  | neg | 808.5134 | C44 H75 O10 N1 P1 |
| neg_479 | PS(18:0/20:5)  | neg | 808.5134 | C44 H75 O10 N1 P1 |
| neg_480 | PS(18:0e/20:5) | neg | 794.5341 | C44 H77 O9 N1 P1  |
| neg_481 | PS(18:2/20:4)  | neg | 806.4978 | C44 H73 O10 N1 P1 |
| neg_482 | PS(20:5/18:2)  | neg | 804.4821 | C44 H71 O10 N1 P1 |
| neg_483 | PS(18:3e/20:4) | neg | 790.5028 | C44 H73 O9 N1 P1  |
| neg_484 | PS(18:3/20:5)  | neg | 802.4665 | C44 H69 O10 N1 P1 |
| neg_485 | PS(18:1/21:0)  | neg | 830.5917 | C45 H85 O10 N1 P1 |
| neg_486 | PS(19:0/20:4)  | neg | 824.5447 | C45 H79 O10 N1 P1 |
| neg_487 | PS(19:0/20:5)  | neg | 822.5291 | C45 H77 O10 N1 P1 |
| neg_488 | PS(17:0/22:6)  | neg | 820.5134 | C45 H75 O10 N1 P1 |
| neg_490 | PS(18:0/22:4)  | neg | 838.5604 | C46 H81 O10 N1 P1 |
| neg_491 | PS(20:0e/20:4) | neg | 824.5811 | C46 H83 O9 N1 P1  |
| neg_492 | PS(20:0/20:5)  | neg | 836.5447 | C46 H79 O10 N1 P1 |
| neg_493 | PS(18:1/22:4)  | neg | 836.5447 | C46 H79 O10 N1 P1 |
| neg_494 | PS(20:2/20:4)  | neg | 834.5291 | C46 H77 O10 N1 P1 |
| neg_496 | PS(18:3e/22:4) | neg | 818.5341 | C46 H77 O9 N1 P1  |
| neg_497 | PS(20:3e/20:4) | neg | 818.5341 | C46 H77 O9 N1 P1  |
| neg_498 | PS(18:2/22:6)  | neg | 830.4978 | C46 H73 O10 N1 P1 |
| neg_499 | PS(18:3e/22:5) | neg | 816.5185 | C46 H75 O9 N1 P1  |
| neg_500 | PS(20:3e/20:5) | neg | 816.5185 | C46 H75 O9 N1 P1  |
| neg_501 | PS(18:3/22:6)  | neg | 828.4821 | C46 H71 O10 N1 P1 |
| neg_502 | PS(18:3e/22:6) | neg | 814.5028 | C46 H73 O9 N1 P1  |

---

# Supplementary Material

|         |                |     |          |                   |
|---------|----------------|-----|----------|-------------------|
| neg_503 | PS(20:4e/20:5) | neg | 814.5028 | C46 H73 O9 N1 P1  |
| neg_504 | PS(18:1/23:0)  | neg | 858.6230 | C47 H89 O10 N1 P1 |
| neg_505 | PS(20:5/21:0)  | neg | 850.5604 | C47 H81 O10 N1 P1 |
| neg_506 | PS(19:0/22:6)  | neg | 848.5447 | C47 H79 O10 N1 P1 |
| neg_507 | PS(20:4/22:6)  | neg | 854.4978 | C48 H73 O10 N1 P1 |
| neg_508 | PS(20:4e/22:6) | neg | 840.5185 | C48 H75 O9 N1 P1  |
| neg_509 | PS(20:5/22:6)  | neg | 852.4821 | C48 H71 O10 N1 P1 |
| neg_510 | PS(20:0/22:6)  | neg | 862.5604 | C48 H81 O10 N1 P1 |
| neg_511 | PS(20:2/22:4)  | neg | 862.5604 | C48 H81 O10 N1 P1 |
| neg_512 | PS(20:0e/22:6) | neg | 848.5811 | C48 H83 O9 N1 P1  |
| neg_513 | PS(20:1/22:6)  | neg | 860.5447 | C48 H79 O10 N1 P1 |
| neg_514 | PS(20:2/22:5)  | neg | 860.5447 | C48 H79 O10 N1 P1 |
| neg_515 | PS(20:3e/22:4) | neg | 846.5654 | C48 H81 O9 N1 P1  |
| neg_517 | PS(20:2/22:6)  | neg | 858.5291 | C48 H77 O10 N1 P1 |
| neg_518 | PS(20:4e/22:4) | neg | 844.5498 | C48 H79 O9 N1 P1  |
| neg_519 | PS(20:3e/22:5) | neg | 844.5498 | C48 H79 O9 N1 P1  |
| neg_520 | PS(20:5/22:4)  | neg | 856.5134 | C48 H75 O10 N1 P1 |
| neg_521 | PS(20:3/22:6)  | neg | 856.5134 | C48 H75 O10 N1 P1 |
| neg_522 | PS(20:4e/22:5) | neg | 842.5341 | C48 H77 O9 N1 P1  |
| neg_523 | PS(20:3e/22:6) | neg | 842.5341 | C48 H77 O9 N1 P1  |
| neg_524 | PS(22:5/21:0)  | neg | 878.5917 | C49 H85 O10 N1 P1 |
| neg_525 | PS(22:6/21:0)  | neg | 876.5760 | C49 H83 O10 N1 P1 |
| neg_526 | PS(22:6/23:0)  | neg | 904.6073 | C51 H87 O10 N1 P1 |

---

|         |                   |     |           |                    |
|---------|-------------------|-----|-----------|--------------------|
| neg_527 | PS(25:0/22:6)     | neg | 932.6386  | C53 H91 O10 N1 P1  |
| neg_528 | PS(27:0/22:6)     | neg | 960.6699  | C55 H95 O10 N1 P1  |
| neg_529 | PS(32:1/22:6)     | neg | 1028.7325 | C60 H103 O10 N1 P1 |
| neg_530 | SM(d18:2/14:0)    | neg | 717.5188  | C38 H74 O8 N2 P1   |
| neg_531 | SM(d16:1/19:0)    | neg | 761.5814  | C41 H82 O8 N2 P1   |
| neg_532 | SM(d16:1/20:0)    | neg | 775.5971  | C42 H84 O8 N2 P1   |
| neg_533 | SM(d16:1/22:1)    | neg | 801.6127  | C44 H86 O8 N2 P1   |
| neg_534 | SM(d16:1/23:0)    | neg | 817.6440  | C45 H90 O8 N2 P1   |
| neg_535 | SM(d18:1/21:1)    | neg | 815.6284  | C45 H88 O8 N2 P1   |
| neg_536 | SM(d16:1/24:2)    | neg | 827.6284  | C46 H88 O8 N2 P1   |
| neg_537 | SM(d17:1/24:1)    | neg | 843.6597  | C47 H92 O8 N2 P1   |
| neg_538 | SM(d20:0/24:1)    | neg | 887.7223  | C50 H100 O8 N2 P1  |
| neg_539 | cPA(22:6)         | neg | 463.2255  | C25 H36 O6 N0 P1   |
| neg_540 | dMePE(14:0/14:0)  | neg | 662.4766  | C35 H69 O8 N1 P1   |
| neg_542 | dMePE(16:0/14:0)  | neg | 690.5079  | C37 H73 O8 N1 P1   |
| neg_543 | dMePE(16:0e/14:0) | neg | 676.5287  | C37 H75 O7 N1 P1   |
| neg_544 | dMePE(16:1/14:0)  | neg | 688.4923  | C37 H71 O8 N1 P1   |
| neg_545 | dMePE(16:1e/14:0) | neg | 674.5130  | C37 H73 O7 N1 P1   |
| neg_546 | dMePE(16:1/14:1)  | neg | 686.4766  | C37 H69 O8 N1 P1   |
| neg_547 | dMePE(15:0/16:0)  | neg | 704.5236  | C38 H75 O8 N1 P1   |
| neg_549 | dMePE(16:0/16:0)  | neg | 718.5392  | C39 H77 O8 N1 P1   |
| neg_550 | dMePE(16:0e/16:0) | neg | 704.5600  | C39 H79 O7 N1 P1   |
| neg_551 | dMePE(16:0/16:1)  | neg | 716.5236  | C39 H75 O8 N1 P1   |

---

## Supplementary Material

---

|         |                   |     |          |                  |
|---------|-------------------|-----|----------|------------------|
| neg_552 | dMePE(16:0e/16:1) | neg | 702.5443 | C39 H77 O7 N1 P1 |
| neg_555 | dMePE(16:1e/16:1) | neg | 700.5287 | C39 H75 O7 N1 P1 |
| neg_556 | dMePE(17:1/16:0)  | neg | 730.5392 | C40 H77 O8 N1 P1 |
| neg_557 | dMePE(16:0/18:1)  | neg | 744.5549 | C41 H79 O8 N1 P1 |
| neg_558 | dMePE(16:0e/18:1) | neg | 730.5756 | C41 H81 O7 N1 P1 |
| neg_559 | dMePE(16:1/18:1)  | neg | 742.5392 | C41 H77 O8 N1 P1 |
| neg_560 | dMePE(16:0/18:3)  | neg | 740.5236 | C41 H75 O8 N1 P1 |
| neg_561 | dMePE(14:0/20:4)  | neg | 738.5079 | C41 H73 O8 N1 P1 |
| neg_562 | dMePE(14:0/20:5)  | neg | 736.4923 | C41 H71 O8 N1 P1 |
| neg_563 | dMePE(17:0/18:1)  | neg | 758.5705 | C42 H81 O8 N1 P1 |
| neg_564 | dMePE(17:1/18:1)  | neg | 756.5549 | C42 H79 O8 N1 P1 |
| neg_565 | dMePE(18:0/18:1)  | neg | 772.5862 | C43 H83 O8 N1 P1 |
| neg_566 | dMePE(16:1e/20:0) | neg | 758.6069 | C43 H85 O7 N1 P1 |
| neg_567 | dMePE(18:1/18:1)  | neg | 770.5705 | C43 H81 O8 N1 P1 |
| neg_568 | dMePE(18:0/18:2)  | neg | 770.5705 | C43 H81 O8 N1 P1 |
| neg_570 | dMePE(16:0/20:4)  | neg | 766.5392 | C43 H77 O8 N1 P1 |
| neg_571 | dMePE(16:0e/20:4) | neg | 752.5600 | C43 H79 O7 N1 P1 |
| neg_572 | dMePE(16:1/20:4)  | neg | 764.5236 | C43 H75 O8 N1 P1 |
| neg_573 | dMePE(16:0/20:5)  | neg | 764.5236 | C43 H75 O8 N1 P1 |
| neg_574 | dMePE(16:0e/20:5) | neg | 750.5443 | C43 H77 O7 N1 P1 |
| neg_575 | dMePE(16:1e/20:4) | neg | 750.5443 | C43 H77 O7 N1 P1 |
| neg_576 | dMePE(16:1/20:5)  | neg | 762.5079 | C43 H73 O8 N1 P1 |
| neg_577 | dMePE(14:0/22:6)  | neg | 762.5079 | C43 H73 O8 N1 P1 |

---

---

|         |                   |     |          |                  |
|---------|-------------------|-----|----------|------------------|
| neg_578 | dMePE(14:0e/22:6) | neg | 748.5287 | C43 H75 O7 N1 P1 |
| neg_579 | dMePE(16:1e/20:5) | neg | 748.5287 | C43 H75 O7 N1 P1 |
| neg_580 | dMePE(14:1e/22:6) | neg | 746.5130 | C43 H73 O7 N1 P1 |
| neg_581 | dMePE(16:0/22:4)  | neg | 794.5705 | C45 H81 O8 N1 P1 |
| neg_582 | dMePE(18:0/20:4)  | neg | 794.5705 | C45 H81 O8 N1 P1 |
| neg_583 | dMePE(18:0e/20:4) | neg | 780.5913 | C45 H83 O7 N1 P1 |
| neg_584 | dMePE(16:0/22:5)  | neg | 792.5549 | C45 H79 O8 N1 P1 |
| neg_585 | dMePE(18:1/20:5)  | neg | 790.5392 | C45 H77 O8 N1 P1 |
| neg_586 | dMePE(16:0/22:6)  | neg | 790.5392 | C45 H77 O8 N1 P1 |
| neg_587 | dMePE(16:0e/22:6) | neg | 776.5600 | C45 H79 O7 N1 P1 |
| neg_588 | dMePE(16:1/22:6)  | neg | 788.5236 | C45 H75 O8 N1 P1 |
| neg_589 | dMePE(16:1e/22:6) | neg | 774.5443 | C45 H77 O7 N1 P1 |
| neg_590 | dMePE(19:0/20:4)  | neg | 808.5862 | C46 H83 O8 N1 P1 |
| neg_591 | dMePE(17:1/22:6)  | neg | 802.5392 | C46 H77 O8 N1 P1 |
| neg_592 | dMePE(20:5/20:5)  | neg | 810.5079 | C47 H73 O8 N1 P1 |
| neg_593 | dMePE(18:1/22:5)  | neg | 818.5705 | C47 H81 O8 N1 P1 |
| neg_594 | dMePE(18:0/22:6)  | neg | 818.5705 | C47 H81 O8 N1 P1 |
| neg_595 | dMePE(18:0e/22:6) | neg | 804.5913 | C47 H83 O7 N1 P1 |
| neg_596 | dMePE(18:1/22:6)  | neg | 816.5549 | C47 H79 O8 N1 P1 |
| neg_597 | dMePE(18:2/22:6)  | neg | 814.5392 | C47 H77 O8 N1 P1 |
| neg_598 | dMePE(20:5/20:4)  | neg | 812.5236 | C47 H75 O8 N1 P1 |
| neg_599 | dMePE(20:5/22:5)  | neg | 838.5392 | C49 H77 O8 N1 P1 |
| neg_600 | dMePE(20:4/22:6)  | neg | 838.5392 | C49 H77 O8 N1 P1 |

---

# Supplementary Material

|         |                  |     |          |                      |
|---------|------------------|-----|----------|----------------------|
| neg_601 | dMePE(20:5/22:6) | neg | 836.5236 | C49 H75 O8 N1 P1     |
| neg_603 | dMePE(22:6/22:6) | neg | 862.5392 | C51 H77 O8 N1 P1     |
| neg_604 | phSM(d20:0/14:0) | neg | 765.5763 | C40 H82 O9 N2 P1     |
| neg_605 | phSM(d19:0/20:4) | neg | 841.6076 | C46 H86 O9 N2 P1     |
| neg_606 | phSM(t18:1/16:0) | neg | 769.5268 | C39 H79 O8 N2 P1 Cl1 |
| neg_607 | phSM(t18:1/16:1) | neg | 767.5112 | C39 H77 O8 N2 P1 Cl1 |
| neg_608 | phSM(t18:1/18:0) | neg | 797.5581 | C41 H83 O8 N2 P1 Cl1 |
| neg_609 | phSM(t18:1/18:1) | neg | 795.5425 | C41 H81 O8 N2 P1 Cl1 |
| neg_610 | phSM(t18:1/20:4) | neg | 817.5268 | C43 H79 O8 N2 P1 Cl1 |
| neg_611 | phSM(t18:1/20:5) | neg | 815.5112 | C43 H77 O8 N2 P1 Cl1 |
| neg_612 | phSM(t18:1/22:6) | neg | 841.5268 | C45 H79 O8 N2 P1 Cl1 |



**1.2 Table S2. The full names of the compound classification correspond to figure 4.**

|           | Classkey   | Full name                          |
|-----------|------------|------------------------------------|
| Figure 4A | ZyE        | Zymosterol Ester                   |
|           | StE        | Stigmasterol Ester                 |
|           | ChE        | Cholesterol Ester                  |
|           | phSM       | sphingomyelin(phytosphingosine)    |
|           | SPH        | Sphingosine                        |
|           | SM         | sphingomyelin                      |
|           | Hex2Cer    | dihexosylceramides                 |
|           | Hex1Cer    | hexaglycosylceramides              |
|           | GM3        | monosialodihexosylceramide         |
|           | GD2        | Disialoganglioside (GD2)           |
|           | CerG2GNAc1 | dihexosyl N-acetylhexosyl ceramide |
|           | Cer        | ceramides                          |
|           | dMePE      | dimethyl-PE                        |
|           | PS         | phosphatidylserine                 |
|           | PMe        | phosphatidylmethanol               |
|           | PIP2       | phosphatidylinositol bisphosphate  |
|           | PI         | phosphatidylinositol               |
|           | PG         | phosphatidylglycerol               |
|           | PEt        | phosphatidylethanol                |

|         |                                      |
|---------|--------------------------------------|
| PE      | phosphatidylethanolamine             |
| PC      | phosphatidylcholine                  |
| MePC    | methyl-PC                            |
| MLCL    | monolysocardiolipin                  |
| LdMePE  | lysodimethylphosphatidylethanolamine |
| LPI     | lysophosphatidylinositol             |
| LPG     | lysophosphatidylglycerol             |
| LPet    | lysophosphatidylethanol              |
| LPE     | lysophosphatidylethanolamine         |
| LPC     | lysophosphatidylcholine              |
| CL      | Cardiolipin                          |
| BisMePA | Bis-methyl phosphatidic acid         |
| TG      | triglyceride                         |
| MGDG    | Monogalactosyldiacylglycerol         |
| DG      | diglyceride                          |
| WE      | wax ester                            |
| Co      | Coenzyme                             |
| AcCa    | acylcarnitine                        |
| ZyE     | Zymosterol Ester                     |
| SPH     | Sphingosine                          |

Figure 4B

|         |                                      |
|---------|--------------------------------------|
| SM      | sphingomyelin                        |
| Hex3Cer | trihexosylceramides                  |
| Hex2Cer | dihexosylceramides                   |
| GD1a    | Disialoganglioside (GD1a)            |
| Cer     | Ceramides                            |
| dMePE   | dimethyl-PE                          |
| PS      | phosphatidylserine                   |
| PMe     | phosphatidylmethanol                 |
| PIP2    | phosphatidylinositol bisphosphate    |
| PI      | phosphatidylinositol                 |
| PG      | phosphatidylglycerol                 |
| PEt     | phosphatidylethanol                  |
| PE      | phosphatidylethanolamine             |
| PC      | phosphatidylcholine                  |
| MePC    | methyl-PC                            |
| MLCL    | monolysocardioliipin                 |
| LdMePE  | lysodimethylphosphatidylethanolamine |
| LPG     | lysophosphatidylglycerol             |
| LPE     | lysophosphatidylethanolamine         |
| LPC     | lysophosphatidylcholine              |
| CL      | Cardiolipin                          |

|           |         |                                        |
|-----------|---------|----------------------------------------|
| Figure 4C | BisMePA | Bis-methyl phosphatidic acid           |
|           | TG      | triglyceride                           |
|           | DG      | diglyceride                            |
|           | OAHFA   | (O-acyl) $\omega$ -hydroxy fatty acids |
|           | FA      | fatty acyl                             |
|           | Co      | Coenzyme                               |
|           | ZyE     | Zymosterol Ester                       |
|           | StE     | Stigmasterol Ester                     |
|           | ChE     | Cholesterol Ester                      |
|           | PhSM    | sphingomyelin(phytosphingosine)        |
|           | SPHP    | Sphingosine phosphate                  |
|           | SM      | sphingomyelin                          |
|           | Hex3Cer | trihexosylceramides                    |
|           | Hex2Cer | dihexosylceramides                     |
|           | Hex1Cer | hexaglycosylceramides                  |
|           | GM3     | monosialodihexosylceramide             |
|           | GD2     | Disialoganglioside (GD2)               |
|           | Cer     | Ceramides                              |
|           | dMePE   | dimethyl-PE                            |
|           | PS      | phosphatidylserine                     |

|         |                                        |
|---------|----------------------------------------|
| PMe     | phosphatidylmethanol                   |
| PI      | phosphatidylinositol                   |
| PG      | phosphatidylglycerol                   |
| PEt     | phosphatidylethanol                    |
| PE      | phosphatidylethanolamine               |
| PC      | phosphatidylcholine                    |
| MePC    | methyl-PC                              |
| MLCL    | monolysocardiolipin                    |
| LdMePE  | lysodimethylphosphatidylethanolamine   |
| LPI     | lysophosphatidylinositol               |
| LPG     | lysophosphatidylglycerol               |
| LPEt    | lysophosphatidylethanol                |
| LPE     | lysophosphatidylethanolamine           |
| LPC     | lysophosphatidylcholine                |
| CL      | Cardiolipin                            |
| BisMePA | Bis-methyl phosphatidic acid           |
| TG      | triglyceride                           |
| MGDG    | Monogalactosyldiacylglycerol           |
| DG      | diglyceride                            |
| OA HFA  | (O-acyl) $\omega$ -hydroxy fatty acids |
| FA      | fatty acyl                             |

Co

Coenzyme

---

**1.3 Table S3. Higher abundant levels of lipid species in simple-packaged (SP) pike eels in comparison with fresh (FE) pike eels via LC-MS/MS analysis.**

| ID      | Lipids          | Mode | Formula       | VIP    | FC     | <i>P</i> value | FDR    |
|---------|-----------------|------|---------------|--------|--------|----------------|--------|
| pos_2   | AcCa(13:0)      | pos  | C20 H40 O4 N1 | 1.0049 | 1.1158 | 0.0172         | 0.0367 |
| pos_36  | Cer(d16:1/16:0) | pos  | C32 H62 O2 N1 | 1.2584 | 1.1894 | 0.0033         | 0.0129 |
| pos_37  | Cer(d17:1/16:0) | pos  | C33 H64 O2 N1 | 0.9592 | 1.0976 | 0.0150         | 0.0333 |
| pos_54  | Cer(d16:0/24:1) | pos  | C40 H80 O3 N1 | 1.1409 | 1.1225 | 0.0018         | 0.0095 |
| pos_59  | Cer(d19:1/22:0) | pos  | C41 H82 O3 N1 | 1.3060 | 1.2294 | 0.0122         | 0.0288 |
| pos_62  | Cer(d19:1/23:0) | pos  | C42 H82 O2 N1 | 1.5331 | 1.2687 | 0.0025         | 0.0109 |
| pos_65  | Cer(d18:1/24:1) | pos  | C42 H82 O3 N1 | 0.9129 | 1.0661 | 0.0017         | 0.0095 |
| pos_68  | Cer(d17:1/26:1) | pos  | C43 H84 O3 N1 | 0.9546 | 1.0858 | 0.0026         | 0.0111 |
| pos_75  | Cer(m18:0/24:0) | pos  | C42 H86 O2 N1 | 1.3626 | 1.1597 | 0.0001         | 0.0052 |
| pos_77  | Cer(t16:0/14:0) | pos  | C30 H58 O2 N1 | 1.1956 | 1.1199 | 0.0063         | 0.0186 |
| pos_79  | Cer(t17:0/16:0) | pos  | C33 H64 O2 N1 | 1.2883 | 1.1225 | 0.0013         | 0.0080 |
| pos_85  | Cer(t16:0/21:0) | pos  | C37 H72 O2 N1 | 0.9159 | 1.0718 | 0.0005         | 0.0064 |
| pos_88  | Cer(t16:0/22:3) | pos  | C38 H70 O3 N1 | 0.9481 | 1.0883 | 0.0089         | 0.0230 |
| pos_99  | ChE(16:0)       | pos  | C43 H80 O2 N1 | 1.6544 | 1.2597 | 0.0006         | 0.0064 |
| pos_102 | ChE(18:0)       | pos  | C45 H84 O2 N1 | 1.6998 | 1.2879 | 0.0004         | 0.0063 |
| pos_103 | ChE(18:1)       | pos  | C45 H82 O2 N1 | 2.1196 | 1.3981 | 0.0001         | 0.0052 |
| pos_105 | ChE(19:1)       | pos  | C46 H84 O2 N1 | 1.6102 | 1.2589 | 0.0006         | 0.0064 |
| pos_106 | ChE(20:1)       | pos  | C47 H86 O2 N1 | 1.9066 | 1.3855 | 0.0006         | 0.0064 |
| pos_107 | ChE(20:2)       | pos  | C47 H84 O2 N1 | 1.5726 | 1.2298 | 0.0006         | 0.0064 |
| pos_110 | ChE(20:5)       | pos  | C47 H75 O2    | 1.8443 | 1.3518 | 0.0006         | 0.0064 |
| pos_111 | ChE(22:1)       | pos  | C49 H90 O2 N1 | 1.7979 | 1.3328 | 0.0002         | 0.0062 |

# Supplementary Material

|         |                     |     |                  |        |        |        |        |
|---------|---------------------|-----|------------------|--------|--------|--------|--------|
| pos_112 | ChE(22:2)           | pos | C49 H88 O2 N1    | 1.4904 | 1.2206 | 0.0006 | 0.0064 |
| pos_113 | ChE(22:4)           | pos | C49 H84 O2 N1    | 1.7741 | 1.3073 | 0.0004 | 0.0063 |
| pos_114 | ChE(22:5)           | pos | C49 H82 O2 N1    | 1.7665 | 1.2805 | 0.0003 | 0.0063 |
| pos_115 | ChE(22:6)           | pos | C49 H77 O2       | 1.6945 | 1.2822 | 0.0007 | 0.0064 |
| pos_116 | ChE(24:1)           | pos | C51 H94 O2 N1    | 1.3268 | 1.1891 | 0.0020 | 0.0099 |
| pos_117 | ChE(24:2)           | pos | C51 H92 O2 N1    | 1.6410 | 1.3111 | 0.0005 | 0.0064 |
| pos_118 | ChE(30:5)           | pos | C57 H98 O2 N1    | 0.9858 | 1.1076 | 0.0052 | 0.0164 |
| pos_119 | Co(Q10)             | pos | C59 H91 O4       | 0.9777 | 1.1009 | 0.0106 | 0.0262 |
| pos_120 | Co(Q8)              | pos | C49 H75 O4       | 1.6634 | 1.2181 | 0.0026 | 0.0112 |
| pos_139 | DG(16:0/17:0)       | pos | C36 H74 O5 N1    | 1.0160 | 1.0701 | 0.0001 | 0.0047 |
| pos_213 | DG(18:1/20:5)       | pos | C41 H69 O5       | 1.2673 | 1.1925 | 0.0065 | 0.0189 |
| pos_290 | DG(33:0/18:1)       | pos | C54 H108 O5 N1   | 1.2397 | 1.1268 | 0.0021 | 0.0102 |
| pos_298 | DG(33:1/24:1)       | pos | C60 H118 O5 N1   | 0.9210 | 1.0685 | 0.0008 | 0.0067 |
| pos_299 | Hex1Cer(d16:1/16:0) | pos | C38 H74 O8 N1    | 1.1737 | 1.1400 | 0.0034 | 0.0132 |
| pos_301 | Hex1Cer(d16:1/22:0) | pos | C44 H86 O8 N1    | 1.0020 | 1.0872 | 0.0010 | 0.0072 |
| pos_322 | LPC(14:0e)          | pos | C22 H49 O6 N1 P1 | 1.0877 | 1.0934 | 0.0007 | 0.0065 |
| pos_323 | LPC(14:1e)          | pos | C22 H47 O6 N1 P1 | 0.9834 | 1.0927 | 0.0050 | 0.0161 |
| pos_326 | LPC(16:0e)          | pos | C24 H53 O6 N1 P1 | 1.2507 | 1.1017 | 0.0001 | 0.0060 |
| pos_328 | LPC(16:1e)          | pos | C24 H51 O6 N1 P1 | 1.0852 | 1.0961 | 0.0008 | 0.0066 |
| pos_329 | LPC(16:2e)          | pos | C24 H49 O6 N1 P1 | 1.4743 | 1.2151 | 0.0010 | 0.0072 |
| pos_330 | LPC(17:0)           | pos | C25 H53 O7 N1 P1 | 1.0724 | 1.0973 | 0.0023 | 0.0106 |
| pos_333 | LPC(18:0e)          | pos | C26 H57 O6 N1 P1 | 1.5377 | 1.1743 | 0.0000 | 0.0040 |
| pos_335 | LPC(18:1e)          | pos | C26 H55 O6 N1 P1 | 1.2344 | 1.1067 | 0.0004 | 0.0063 |



|         |                  |     |                      |        |        |        |        |
|---------|------------------|-----|----------------------|--------|--------|--------|--------|
| pos_337 | LPC(18:2e)       | pos | C26 H53 O6 N1 P1     | 1.0440 | 1.1110 | 0.0063 | 0.0186 |
| pos_341 | LPC(19:0)        | pos | C27 H57 O7 N1 P1     | 1.2261 | 1.1671 | 0.0045 | 0.0154 |
| pos_343 | LPC(20:0)        | pos | C28 H59 O7 N1 P1     | 1.3062 | 1.1333 | 0.0002 | 0.0061 |
| pos_344 | LPC(20:0e)       | pos | C28 H61 O6 N1 P1     | 1.5429 | 1.1642 | 0.0000 | 0.0012 |
| pos_346 | LPC(20:1e)       | pos | C28 H59 O6 N1 P1     | 1.4315 | 1.1749 | 0.0011 | 0.0073 |
| pos_350 | LPC(20:3e)       | pos | C28 H55 O6 N1 P1     | 1.2819 | 1.1901 | 0.0035 | 0.0134 |
| pos_352 | LPC(20:4e)       | pos | C28 H53 O6 N1 P1     | 1.3780 | 1.1863 | 0.0010 | 0.0071 |
| pos_355 | LPC(22:0)        | pos | C30 H63 O7 N1 P1     | 1.2863 | 1.1616 | 0.0013 | 0.0080 |
| pos_362 | LPC(23:0)        | pos | C31 H65 O7 N1 P1     | 1.2861 | 1.2064 | 0.0069 | 0.0195 |
| pos_363 | LPC(23:1)        | pos | C31 H63 O7 N1 P1     | 1.4082 | 1.2006 | 0.0002 | 0.0062 |
| pos_364 | LPC(24:0)        | pos | C32 H67 O7 N1 P1     | 1.1002 | 1.1277 | 0.0123 | 0.0288 |
| pos_366 | LPC(24:2)        | pos | C32 H63 O7 N1 P1     | 1.1580 | 1.1357 | 0.0006 | 0.0064 |
| pos_367 | LPC(26:1)        | pos | C34 H69 O7 N1 P1     | 1.2462 | 1.1826 | 0.0087 | 0.0226 |
| pos_368 | LPC(28:0)        | pos | C36 H75 O7 N1 P1     | 0.8932 | 1.0571 | 0.0002 | 0.0061 |
| pos_373 | LPC(32:0)        | pos | C40 H82 O7 N1 P1 Na1 | 0.9396 | 1.0709 | 0.0020 | 0.0099 |
| pos_374 | LPC(32:1)        | pos | C40 H80 O7 N1 P1 Na1 | 0.9457 | 1.0716 | 0.0016 | 0.0089 |
| pos_375 | LPC(33:1)        | pos | C41 H82 O7 N1 P1 Na1 | 1.1024 | 1.1182 | 0.0067 | 0.0194 |
| pos_376 | LPC(34:1)        | pos | C42 H84 O7 N1 P1 Na1 | 1.0769 | 1.0861 | 0.0008 | 0.0067 |
| pos_382 | LPE(18:1e)       | pos | C23 H48 O6 N1 P1 Na1 | 1.1591 | 1.0948 | 0.0002 | 0.0062 |
| pos_394 | MePC(8:0/11:2)   | pos | C28 H52 O8 N1 P1 Na1 | 1.2238 | 1.1804 | 0.0420 | 0.0720 |
| pos_396 | MePC(8:0e/11:4)  | pos | C28 H50 O7 N1 P1 Na1 | 1.3009 | 1.2039 | 0.0094 | 0.0240 |
| pos_400 | MePC(11:0/18:2)  | pos | C40 H80 O8 N2 P1     | 1.5779 | 1.2711 | 0.0005 | 0.0064 |
| pos_401 | MePC(18:0e/11:4) | pos | C40 H78 O7 N2 P1     | 1.4365 | 1.2509 | 0.0034 | 0.0131 |

# Supplementary Material

|         |                  |     |                      |        |        |        |        |
|---------|------------------|-----|----------------------|--------|--------|--------|--------|
| pos_402 | MePC(12:0/18:2)  | pos | C41 H82 O8 N2 P1     | 1.5782 | 1.3189 | 0.0007 | 0.0066 |
| pos_405 | MePC(11:0/20:2)  | pos | C42 H84 O8 N2 P1     | 1.8050 | 1.3175 | 0.0003 | 0.0063 |
| pos_406 | MePC(11:0/20:3)  | pos | C42 H82 O8 N2 P1     | 1.8481 | 1.4117 | 0.0003 | 0.0063 |
| pos_407 | MePC(11:0/20:4)  | pos | C42 H80 O8 N2 P1     | 1.2817 | 1.1843 | 0.0016 | 0.0089 |
| pos_408 | MePC(20:0e/11:4) | pos | C42 H82 O7 N2 P1     | 1.8824 | 1.4472 | 0.0003 | 0.0063 |
| pos_410 | MePC(16:1/16:1)  | pos | C43 H86 O8 N2 P1     | 1.7140 | 1.3813 | 0.0005 | 0.0064 |
| pos_411 | MePC(14:0e/18:2) | pos | C41 H80 O7 N1 P1 Na1 | 1.0491 | 1.1023 | 0.0024 | 0.0109 |
| pos_418 | MePC(15:0/18:2)  | pos | C42 H84 O8 N2 P1     | 2.0873 | 1.4048 | 0.0003 | 0.0063 |
| pos_419 | MePC(15:0/18:3)  | pos | C42 H82 O8 N2 P1     | 1.8488 | 1.4112 | 0.0003 | 0.0063 |
| pos_420 | MePC(20:4e/13:0) | pos | C42 H82 O7 N2 P1     | 1.8616 | 1.4905 | 0.0014 | 0.0084 |
| pos_421 | MePC(11:0/22:5)  | pos | C44 H82 O8 N2 P1     | 1.3644 | 1.2039 | 0.0019 | 0.0099 |
| pos_424 | MePC(16:1/18:2)  | pos | C45 H88 O8 N2 P1     | 2.3032 | 2.4903 | 0.0080 | 0.0216 |
| pos_437 | MePC(17:1/18:2)  | pos | C46 H90 O8 N2 P1     | 1.7759 | 1.3630 | 0.0001 | 0.0060 |
| pos_438 | MePC(15:0/20:5)  | pos | C44 H82 O8 N2 P1     | 1.3644 | 1.2038 | 0.0019 | 0.0099 |
| pos_442 | MePC(16:0e/20:4) | pos | C45 H84 O7 N1 P1 Na1 | 4.1363 | #####  | 0.0000 | 0.0000 |
| pos_451 | MePC(19:1/18:2)  | pos | C48 H94 O8 N2 P1     | 1.8894 | 1.3625 | 0.0001 | 0.0052 |
| pos_463 | MePC(17:0/22:6)  | pos | C50 H92 O8 N2 P1     | 1.1930 | 1.1615 | 0.0045 | 0.0154 |
| pos_470 | MePC(20:4e/21:0) | pos | C50 H94 O7 N1 P1 Na1 | 1.0224 | 1.1148 | 0.0160 | 0.0349 |
| pos_476 | PC(12:0e/6:0)    | pos | C26 H54 O7 N1 P1 Na1 | 1.0209 | 1.1075 | 0.0027 | 0.0113 |
| pos_486 | PC(6:0/14:3)     | pos | C28 H51 O8 N1 P1     | 1.1618 | 1.1756 | 0.0191 | 0.0397 |
| pos_487 | PC(8:0e/13:0)    | pos | C29 H61 O7 N1 P1     | 1.3458 | 1.1426 | 0.0496 | 0.0813 |
| pos_489 | PC(10:0e/11:3)   | pos | C29 H55 O7 N1 P1     | 1.3124 | 1.1228 | 0.0003 | 0.0063 |
| pos_494 | PC(4:0/18:3)     | pos | C30 H55 O8 N1 P1     | 1.0677 | 1.1664 | 0.0165 | 0.0356 |

|         |                |     |                      |        |        |        |        |
|---------|----------------|-----|----------------------|--------|--------|--------|--------|
| pos_495 | PC(8:1e/15:0)  | pos | C31 H63 O7 N1 P1     | 1.4082 | 1.2006 | 0.0002 | 0.0062 |
| pos_498 | PC(12:0e/12:0) | pos | C32 H67 O7 N1 P1     | 1.1002 | 1.1276 | 0.0123 | 0.0288 |
| pos_500 | PC(8:1e/18:2)  | pos | C34 H65 O7 N1 P1     | 1.0282 | 1.1494 | 0.0275 | 0.0522 |
| pos_504 | PC(14:0/14:0)  | pos | C36 H72 O8 N1 P1 Na1 | 0.8971 | 1.0713 | 0.0022 | 0.0103 |
| pos_506 | PC(16:0/13:0)  | pos | C37 H75 O8 N1 P1     | 1.2603 | 1.1289 | 0.0014 | 0.0085 |
| pos_508 | PC(8:0e/21:0)  | pos | C37 H77 O7 N1 P1     | 1.0428 | 1.0937 | 0.0004 | 0.0064 |
| pos_511 | PC(11:0/18:2)  | pos | C37 H71 O8 N1 P1     | 1.7068 | 1.1916 | 0.0010 | 0.0072 |
| pos_516 | PC(12:0e/18:1) | pos | C38 H77 O7 N1 P1     | 0.9699 | 1.0662 | 0.0001 | 0.0060 |
| pos_522 | PC(8:0/22:3)   | pos | C38 H71 O8 N1 P1     | 0.8971 | 1.0713 | 0.0022 | 0.0103 |
| pos_525 | PC(8:0e/23:0)  | pos | C39 H81 O7 N1 P1     | 0.9700 | 1.0829 | 0.0086 | 0.0225 |
| pos_526 | PC(15:0/16:1)  | pos | C39 H77 O8 N1 P1     | 0.9854 | 1.1170 | 0.0204 | 0.0416 |
| pos_528 | PC(14:0e/17:1) | pos | C39 H79 O7 N1 P1     | 1.2179 | 1.0771 | 0.0000 | 0.0011 |
| pos_533 | PC(20:5/11:4)  | pos | C39 H61 O8 N1 P1     | 1.4623 | 1.1994 | 0.0008 | 0.0066 |
| pos_534 | PC(16:0/16:0)  | pos | C40 H81 O8 N1 P1     | 0.9790 | 1.0760 | 0.0001 | 0.0060 |
| pos_542 | PC(16:1e/16:1) | pos | C40 H79 O7 N1 P1     | 0.8923 | 1.0582 | 0.0005 | 0.0064 |
| pos_544 | PC(14:1e/18:2) | pos | C40 H77 O7 N1 P1     | 1.0501 | 1.1097 | 0.0398 | 0.0690 |
| pos_550 | PC(18:0/15:0)  | pos | C41 H83 O8 N1 P1     | 1.0099 | 1.0783 | 0.0004 | 0.0063 |
| pos_551 | PC(16:0/17:0)  | pos | C41 H83 O8 N1 P1     | 1.0247 | 1.0704 | 0.0001 | 0.0060 |
| pos_556 | PC(16:0e/17:1) | pos | C41 H83 O7 N1 P1     | 0.9308 | 1.0610 | 0.0007 | 0.0066 |
| pos_569 | PC(16:1e/18:0) | pos | C42 H85 O7 N1 P1     | 0.8970 | 1.0496 | 0.0003 | 0.0063 |
| pos_573 | PC(16:0e/18:2) | pos | C42 H83 O7 N1 P1     | 0.9478 | 1.0640 | 0.0010 | 0.0072 |
| pos_574 | PC(16:1e/18:1) | pos | C42 H83 O7 N1 P1     | 0.9410 | 1.0626 | 0.0007 | 0.0065 |
| pos_578 | PC(16:1e/18:2) | pos | C42 H81 O7 N1 P1     | 0.9358 | 1.0684 | 0.0014 | 0.0085 |

# Supplementary Material

|         |                |     |                      |        |        |        |        |
|---------|----------------|-----|----------------------|--------|--------|--------|--------|
| pos_591 | PC(18:0/17:0)  | pos | C43 H87 O8 N1 P1     | 0.9606 | 1.0679 | 0.0014 | 0.0084 |
| pos_599 | PC(16:2e/19:1) | pos | C43 H83 O7 N1 P1     | 0.9716 | 1.0748 | 0.0010 | 0.0070 |
| pos_602 | PC(20:4e/15:0) | pos | C43 H81 O7 N1 P1     | 0.9922 | 1.0872 | 0.0021 | 0.0099 |
| pos_605 | PC(20:0/16:0)  | pos | C44 H89 O8 N1 P1     | 1.1457 | 1.1459 | 0.0211 | 0.0428 |
| pos_607 | PC(18:0/18:1)  | pos | C44 H87 O8 N1 P1     | 1.0652 | 1.1074 | 0.0303 | 0.0559 |
| pos_609 | PC(18:0e/18:1) | pos | C44 H89 O7 N1 P1     | 1.0302 | 1.0875 | 0.0014 | 0.0084 |
| pos_612 | PC(18:0e/18:2) | pos | C44 H87 O7 N1 P1     | 0.9557 | 1.0622 | 0.0031 | 0.0126 |
| pos_614 | PC(18:1/18:2)  | pos | C44 H83 O8 N1 P1     | 2.4224 | 2.0024 | 0.0014 | 0.0083 |
| pos_615 | PC(16:0/20:3)  | pos | C44 H83 O8 N1 P1     | 1.5955 | 1.2605 | 0.0005 | 0.0064 |
| pos_617 | PC(18:1e/18:2) | pos | C44 H85 O7 N1 P1     | 0.9133 | 1.0582 | 0.0013 | 0.0080 |
| pos_620 | PC(16:0e/20:4) | pos | C44 H83 O7 N1 P1     | 1.5509 | 1.2509 | 0.0089 | 0.0229 |
| pos_621 | PC(16:2e/20:2) | pos | C44 H82 O7 N1 P1 Na1 | 0.9292 | 1.0625 | 0.0022 | 0.0103 |
| pos_622 | PC(16:1/20:4)  | pos | C44 H79 O8 N1 P1     | 1.6736 | 1.2927 | 0.0004 | 0.0063 |
| pos_624 | PC(16:1e/20:4) | pos | C44 H81 O7 N1 P1     | 2.1210 | 1.5568 | 0.0000 | 0.0027 |
| pos_628 | PC(16:1/20:5)  | pos | C44 H77 O8 N1 P1     | 1.6481 | 1.3100 | 0.0019 | 0.0099 |
| pos_639 | PC(19:1/18:2)  | pos | C45 H85 O8 N1 P1     | 0.9565 | 1.0646 | 0.0005 | 0.0064 |
| pos_642 | PC(17:0/20:4)  | pos | C45 H83 O8 N1 P1     | 1.8830 | 1.5072 | 0.0030 | 0.0124 |
| pos_646 | PC(17:1/20:4)  | pos | C45 H81 O8 N1 P1     | 1.6748 | 1.3590 | 0.0013 | 0.0080 |
| pos_650 | PC(15:0/22:6)  | pos | C45 H79 O8 N1 P1     | 1.3674 | 1.2324 | 0.0007 | 0.0066 |
| pos_659 | PC(20:1/18:2)  | pos | C46 H87 O8 N1 P1     | 2.5145 | 1.7615 | 0.0005 | 0.0064 |
| pos_663 | PC(16:0e/22:4) | pos | C46 H87 O7 N1 P1     | 1.0227 | 1.0738 | 0.0006 | 0.0064 |
| pos_664 | PC(18:2e/20:2) | pos | C46 H86 O7 N1 P1 Na1 | 0.9725 | 1.0759 | 0.0020 | 0.0099 |
| pos_666 | PC(18:1/20:4)  | pos | C46 H83 O8 N1 P1     | 1.9794 | 1.3824 | 0.0002 | 0.0061 |

---

|         |                |     |                      |        |        |        |        |
|---------|----------------|-----|----------------------|--------|--------|--------|--------|
| pos_670 | PC(18:2e/20:3) | pos | C46 H84 O7 N1 P1 Na1 | 1.0514 | 1.0945 | 0.0039 | 0.0143 |
| pos_673 | PC(16:0/22:6)  | pos | C46 H81 O8 N1 P1     | 1.2027 | 1.1974 | 0.0275 | 0.0522 |
| pos_676 | PC(16:2e/22:4) | pos | C46 H82 O7 N1 P1 Na1 | 1.0553 | 1.0897 | 0.0034 | 0.0132 |
| pos_689 | PC(17:0/22:3)  | pos | C47 H89 O8 N1 P1     | 0.9885 | 1.0717 | 0.0009 | 0.0070 |
| pos_691 | PC(19:0/20:4)  | pos | C47 H87 O8 N1 P1     | 0.9121 | 1.0603 | 0.0013 | 0.0080 |
| pos_692 | PC(19:1/20:3)  | pos | C47 H87 O8 N1 P1     | 1.0639 | 1.0888 | 0.0018 | 0.0095 |
| pos_698 | PC(17:0/22:6)  | pos | C47 H83 O8 N1 P1     | 1.3108 | 1.2370 | 0.0076 | 0.0210 |
| pos_709 | PC(20:0e/20:4) | pos | C48 H91 O7 N1 P1     | 1.0368 | 1.0842 | 0.0018 | 0.0096 |
| pos_710 | PC(20:2e/20:2) | pos | C48 H90 O7 N1 P1 Na1 | 1.2207 | 1.1305 | 0.0003 | 0.0063 |
| pos_711 | PC(20:1/20:4)  | pos | C48 H87 O8 N1 P1     | 1.5719 | 1.2438 | 0.0006 | 0.0064 |
| pos_714 | PC(18:3e/22:2) | pos | C48 H88 O7 N1 P1 Na1 | 0.9950 | 1.1094 | 0.0083 | 0.0221 |
| pos_717 | PC(18:0/22:6)  | pos | C48 H85 O8 N1 P1     | 1.8540 | 1.3917 | 0.0007 | 0.0064 |
| pos_720 | PC(18:2e/22:4) | pos | C48 H86 O7 N1 P1 Na1 | 1.1567 | 1.1021 | 0.0008 | 0.0066 |
| pos_721 | PC(18:1/22:6)  | pos | C48 H83 O8 N1 P1     | 1.9000 | 1.4255 | 0.0002 | 0.0062 |
| pos_724 | PC(18:2/22:6)  | pos | C48 H81 O8 N1 P1     | 1.3297 | 1.2443 | 0.0084 | 0.0222 |
| pos_752 | PC(20:2e/22:4) | pos | C50 H90 O7 N1 P1 Na1 | 1.0360 | 1.0936 | 0.0005 | 0.0064 |
| pos_760 | PC(20:3e/22:6) | pos | C50 H85 O7 N1 P1     | 1.1569 | 1.1021 | 0.0008 | 0.0066 |
| pos_762 | PC(22:6/21:1)  | pos | C51 H89 O8 N1 P1     | 1.1052 | 1.1494 | 0.0301 | 0.0557 |
| pos_766 | PC(24:0/20:4)  | pos | C52 H97 O8 N1 P1     | 1.9824 | 1.7252 | 0.0416 | 0.0714 |
| pos_768 | PC(20:3e/24:2) | pos | C52 H97 O7 N1 P1     | 1.1301 | 1.1454 | 0.0048 | 0.0158 |
| pos_770 | PC(20:4e/24:2) | pos | C52 H95 O7 N1 P1     | 1.0448 | 1.1092 | 0.0043 | 0.0149 |
| pos_779 | PE(16:0/16:1)  | pos | C37 H73 O8 N1 P1     | 1.8846 | 1.2325 | 0.0018 | 0.0095 |
| pos_783 | PE(17:1/16:1)  | pos | C38 H73 O8 N1 P1     | 1.0707 | 1.1284 | 0.0021 | 0.0099 |

---

# Supplementary Material

|         |                |     |                      |        |        |        |        |
|---------|----------------|-----|----------------------|--------|--------|--------|--------|
| pos_788 | PE(16:1e/18:1) | pos | C39 H76 O7 N1 P1 Na1 | 1.1502 | 1.1260 | 0.0115 | 0.0276 |
| pos_871 | PG(14:0/14:0)  | pos | C34 H68 O10 N0 P1    | 1.6733 | 1.3141 | 0.0004 | 0.0063 |
| pos_872 | PG(16:1/14:0)  | pos | C36 H70 O10 N0 P1    | 1.9663 | 1.4357 | 0.0002 | 0.0060 |
| pos_911 | PS(18:0/18:1)  | pos | C42 H81 O10 N1 P1    | 1.3557 | 1.1608 | 0.0005 | 0.0064 |
| pos_914 | PS(18:0/22:5)  | pos | C46 H81 O10 N1 P1    | 1.0231 | 1.1098 | 0.0189 | 0.0393 |
| pos_920 | SM(d18:1/12:0) | pos | C35 H72 O6 N2 P1     | 0.9631 | 1.0726 | 0.0006 | 0.0064 |
| pos_921 | SM(d18:1/13:0) | pos | C36 H74 O6 N2 P1     | 0.8952 | 1.0733 | 0.0047 | 0.0156 |
| pos_923 | SM(d16:1/16:0) | pos | C37 H75 O6 N2 P1 Na1 | 0.9458 | 1.0584 | 0.0006 | 0.0064 |
| pos_924 | SM(d14:0/18:1) | pos | C37 H76 O6 N2 P1     | 0.9651 | 1.0573 | 0.0004 | 0.0063 |
| pos_925 | SM(d16:1/16:1) | pos | C37 H74 O6 N2 P1     | 1.0495 | 1.0985 | 0.0013 | 0.0080 |
| pos_926 | SM(d14:0/18:4) | pos | C37 H70 O6 N2 P1     | 0.8980 | 1.0854 | 0.0063 | 0.0186 |
| pos_931 | SM(d18:2/15:1) | pos | C38 H74 O6 N2 P1     | 0.9345 | 1.0804 | 0.0031 | 0.0126 |
| pos_934 | SM(d18:2/16:0) | pos | C39 H78 O6 N2 P1     | 1.0008 | 1.0722 | 0.0004 | 0.0063 |
| pos_936 | SM(d16:1/18:3) | pos | C39 H74 O6 N2 P1     | 0.9458 | 1.0583 | 0.0006 | 0.0064 |
| pos_944 | SM(d18:2/18:1) | pos | C41 H80 O6 N2 P1     | 1.1293 | 1.1241 | 0.0111 | 0.0271 |
| pos_948 | SM(d19:1/18:1) | pos | C42 H84 O6 N2 P1     | 1.0118 | 1.1085 | 0.0135 | 0.0306 |
| pos_949 | SM(d18:2/19:1) | pos | C42 H82 O6 N2 P1     | 1.0099 | 1.0670 | 0.0003 | 0.0063 |
| pos_950 | SM(d14:0/23:4) | pos | C42 H80 O6 N2 P1     | 1.0676 | 1.0835 | 0.0102 | 0.0254 |
| pos_951 | SM(d16:1/21:3) | pos | C42 H80 O6 N2 P1     | 1.1369 | 1.1224 | 0.0039 | 0.0144 |
| pos_954 | SM(d20:0/18:1) | pos | C43 H88 O6 N2 P1     | 1.4712 | 1.1682 | 0.0115 | 0.0275 |
| pos_958 | SM(d16:1/22:2) | pos | C43 H84 O6 N2 P1     | 0.9963 | 1.0760 | 0.0006 | 0.0064 |
| pos_961 | SM(d18:2/20:5) | pos | C43 H76 O6 N2 P1     | 1.2647 | 1.1370 | 0.0010 | 0.0072 |
| pos_965 | SM(d18:1/21:2) | pos | C44 H86 O6 N2 P1     | 1.1630 | 1.0961 | 0.0272 | 0.0519 |

|          |                |     |                      |        |        |        |        |
|----------|----------------|-----|----------------------|--------|--------|--------|--------|
| pos_966  | SM(d18:0/21:3) | pos | C44 H86 O6 N2 P1     | 1.0636 | 1.0703 | 0.0000 | 0.0027 |
| pos_968  | SM(d18:1/21:5) | pos | C44 H80 O6 N2 P1     | 1.1792 | 1.1039 | 0.0003 | 0.0063 |
| pos_973  | SM(d18:1/22:2) | pos | C45 H88 O6 N2 P1     | 0.8803 | 1.0550 | 0.0009 | 0.0069 |
| pos_974  | SM(d18:1/22:3) | pos | C45 H86 O6 N2 P1     | 0.9760 | 1.0732 | 0.0005 | 0.0064 |
| pos_977  | SM(d16:1/24:4) | pos | C45 H84 O6 N2 P1     | 0.9065 | 1.0620 | 0.0011 | 0.0072 |
| pos_979  | SM(d20:1/20:5) | pos | C45 H82 O6 N2 P1     | 1.4347 | 1.1920 | 0.0018 | 0.0095 |
| pos_980  | SM(d18:1/22:6) | pos | C45 H80 O6 N2 P1     | 1.1231 | 1.1121 | 0.0405 | 0.0698 |
| pos_986  | SM(d18:1/23:4) | pos | C46 H86 O6 N2 P1     | 1.1691 | 1.1108 | 0.0007 | 0.0064 |
| pos_987  | SM(d18:1/23:5) | pos | C46 H84 O6 N2 P1     | 1.4228 | 1.1595 | 0.0000 | 0.0037 |
| pos_991  | SM(d18:1/24:3) | pos | C47 H90 O6 N2 P1     | 0.9775 | 1.0711 | 0.0003 | 0.0063 |
| pos_1000 | SM(d19:1/24:6) | pos | C48 H86 O6 N2 P1     | 1.4969 | 1.1797 | 0.0009 | 0.0070 |
| pos_1005 | SM(d20:0/24:5) | pos | C49 H92 O6 N2 P1     | 1.0861 | 1.1043 | 0.0455 | 0.0764 |
| pos_1006 | SM(d20:0/24:6) | pos | C49 H90 O6 N2 P1     | 1.0292 | 1.0804 | 0.0002 | 0.0061 |
| pos_1007 | SM(t18:0/14:0) | pos | C37 H78 O7 N2 P1     | 1.1038 | 1.1086 | 0.0007 | 0.0066 |
| pos_1008 | SM(t18:1/14:0) | pos | C37 H76 O7 N2 P1     | 1.1828 | 1.1491 | 0.0127 | 0.0294 |
| pos_1009 | SM(t18:0/16:0) | pos | C39 H82 O7 N2 P1     | 1.0832 | 1.1093 | 0.0042 | 0.0149 |
| pos_1010 | SM(t18:1/21:5) | pos | C44 H80 O7 N2 P1     | 1.5334 | 1.3347 | 0.0109 | 0.0267 |
| pos_1012 | SM(t18:1/22:1) | pos | C45 H90 O7 N2 P1     | 1.5476 | 1.2911 | 0.0006 | 0.0064 |
| pos_1013 | SM(t18:1/22:2) | pos | C45 H88 O7 N2 P1     | 2.5985 | 3.6649 | 0.0040 | 0.0145 |
| pos_1015 | SM(t18:1/22:6) | pos | C45 H79 O7 N2 P1 Li1 | 2.0091 | 1.4773 | 0.0001 | 0.0060 |
| pos_1025 | SPH(t20:0)     | pos | C20 H44 O3 N1        | 0.9119 | 1.0860 | 0.0046 | 0.0155 |
| pos_1028 | StE(22:3)      | pos | C51 H88 O2 N1        | 1.4360 | 1.2249 | 0.0044 | 0.0151 |
| pos_1029 | StE(22:4)      | pos | C51 H86 O2 N1        | 1.6107 | 1.2540 | 0.0015 | 0.0087 |

# Supplementary Material

|          |                     |     |                |        |        |        |        |
|----------|---------------------|-----|----------------|--------|--------|--------|--------|
| pos_1030 | StE(30:5)           | pos | C59 H100 O2 N1 | 0.9386 | 1.0808 | 0.0018 | 0.0096 |
| pos_1041 | TG(14:1e/9:0/11:3)  | pos | C37 H65 O5     | 1.2096 | 1.2090 | 0.0346 | 0.0619 |
| pos_1045 | TG(16:0/8:0/11:3)   | pos | C38 H67 O6     | 1.3735 | 1.2034 | 0.0041 | 0.0146 |
| pos_1067 | TG(14:0/10:2/14:0)  | pos | C41 H74 O6 Li1 | 2.3610 | 1.4789 | 0.0000 | 0.0010 |
| pos_1083 | TG(18:3/10:3/11:4)  | pos | C42 H60 O6 Li1 | 1.8223 | 1.3555 | 0.0003 | 0.0063 |
| pos_1095 | TG(16:0/6:0/18:2)   | pos | C43 H78 O6 Li1 | 1.6945 | 1.2811 | 0.0007 | 0.0064 |
| pos_1105 | TG(20:3/10:3/11:4)  | pos | C44 H64 O6 Li1 | 1.5884 | 1.2693 | 0.0042 | 0.0147 |
| pos_1106 | TG(20:4/10:4/11:3)  | pos | C44 H62 O6 Li1 | 1.9663 | 1.4357 | 0.0002 | 0.0060 |
| pos_1112 | TG(17:1/10:4/14:4)  | pos | C44 H67 O6     | 1.5475 | 1.1980 | 0.0036 | 0.0136 |
| pos_1119 | TG(20:4e/6:0/16:0)  | pos | C45 H81 O5     | 2.0964 | 1.2231 | 0.0002 | 0.0061 |
| pos_1163 | TG(15:0/14:0/16:0)  | pos | C48 H96 O6 N1  | 1.1576 | 1.1559 | 0.0095 | 0.0243 |
| pos_1178 | TG(16:0e/14:0/16:0) | pos | C49 H100 O5 N1 | 1.4074 | 1.1906 | 0.0023 | 0.0106 |
| pos_1179 | TG(16:0/14:0/16:1)  | pos | C49 H92 O6 Na1 | 0.9934 | 1.0783 | 0.0085 | 0.0224 |
| pos_1198 | TG(16:0/14:0/17:1)  | pos | C50 H94 O6 Na1 | 1.1113 | 1.0984 | 0.0041 | 0.0147 |
| pos_1200 | TG(16:1/14:0/17:1)  | pos | C50 H92 O6 Na1 | 1.0138 | 1.1026 | 0.0157 | 0.0344 |
| pos_1210 | TG(16:0/11:3/20:2)  | pos | C50 H86 O6 Li1 | 2.2670 | 1.3144 | 0.0000 | 0.0009 |
| pos_1218 | TG(18:0e/14:0/16:0) | pos | C51 H104 O5 N1 | 1.4249 | 1.1753 | 0.0007 | 0.0066 |
| pos_1220 | TG(16:0/16:0/16:1)  | pos | C51 H96 O6 Na1 | 1.1076 | 1.0925 | 0.0025 | 0.0109 |
| pos_1224 | TG(16:0e/16:1/16:1) | pos | C51 H100 O5 N1 | 1.0406 | 1.1506 | 0.0385 | 0.0672 |
| pos_1233 | TG(16:1/14:3/18:1)  | pos | C57 H104 O6 N2 | 1.0574 | 1.1103 | 0.0499 | 0.0818 |
| pos_1246 | TG(16:0/16:0/17:0)  | pos | C52 H104 O6 N1 | 1.6679 | 1.2622 | 0.0005 | 0.0064 |
| pos_1249 | TG(15:0/16:0/18:1)  | pos | C52 H98 O6 Na1 | 1.0879 | 1.0873 | 0.0053 | 0.0166 |
| pos_1252 | TG(16:0/16:1/17:1)  | pos | C52 H96 O6 Na1 | 1.0740 | 1.0880 | 0.0072 | 0.0202 |



---

|          |                     |     |                 |        |        |        |        |
|----------|---------------------|-----|-----------------|--------|--------|--------|--------|
| pos_1254 | TG(16:1/16:1/17:1)  | pos | C52 H94 O6 Na1  | 1.0150 | 1.1126 | 0.0214 | 0.0432 |
| pos_1267 | TG(11:0/18:1/20:5)  | pos | C52 H88 O6 Li1  | 1.9736 | 1.2424 | 0.0000 | 0.0027 |
| pos_1281 | TG(16:1e/16:0/18:1) | pos | C53 H104 O5 N1  | 1.3183 | 1.1452 | 0.0006 | 0.0064 |
| pos_1282 | TG(18:1e/16:0/16:1) | pos | C53 H104 O5 N1  | 1.4293 | 1.1881 | 0.0007 | 0.0065 |
| pos_1288 | TG(16:0/14:0/20:4)  | pos | C53 H94 O6 Na1  | 1.4799 | 1.1739 | 0.0012 | 0.0076 |
| pos_1313 | TG(16:0/17:1/18:1)  | pos | C54 H100 O6 Na1 | 1.0052 | 1.0748 | 0.0051 | 0.0163 |
| pos_1319 | TG(16:1/17:1/18:3)  | pos | C54 H94 O6 Li1  | 1.2216 | 1.1616 | 0.0210 | 0.0428 |
| pos_1333 | TG(18:0/16:0/18:0)  | pos | C55 H110 O6 N1  | 1.3343 | 1.1651 | 0.0012 | 0.0077 |
| pos_1334 | TG(18:0e/16:0/18:0) | pos | C55 H112 O5 N1  | 1.2764 | 1.1581 | 0.0020 | 0.0099 |
| pos_1339 | TG(18:0e/16:0/18:1) | pos | C55 H107 O5     | 1.0391 | 1.0905 | 0.0021 | 0.0102 |
| pos_1343 | TG(18:1e/16:0/18:1) | pos | C55 H108 O5 N1  | 1.1369 | 1.1209 | 0.0080 | 0.0217 |
| pos_1346 | TG(18:1e/16:1/18:1) | pos | C55 H106 O5 N1  | 1.1097 | 1.1318 | 0.0276 | 0.0523 |
| pos_1352 | TG(16:0e/16:0/20:4) | pos | C55 H104 O5 N1  | 1.2019 | 1.1308 | 0.0036 | 0.0135 |
| pos_1353 | TG(16:0/16:1/20:4)  | pos | C55 H96 O6 Na1  | 1.0678 | 1.1203 | 0.0180 | 0.0380 |
| pos_1377 | TG(17:0/18:1/18:1)  | pos | C56 H108 O6 N1  | 1.2027 | 1.1706 | 0.0245 | 0.0477 |
| pos_1386 | TG(16:1/17:0/20:5)  | pos | C56 H96 O6 Li1  | 1.3049 | 1.1329 | 0.0209 | 0.0425 |
| pos_1399 | TG(18:0/16:0/20:0)  | pos | C57 H110 O6 Na1 | 1.4975 | 1.1601 | 0.0274 | 0.0522 |
| pos_1410 | TG(18:0e/18:0/18:1) | pos | C57 H111 O5     | 0.9843 | 1.0844 | 0.0024 | 0.0108 |
| pos_1412 | TG(16:0e/18:1/20:1) | pos | C57 H112 O5 N1  | 0.9600 | 1.0710 | 0.0020 | 0.0099 |
| pos_1415 | TG(18:1e/18:1/18:1) | pos | C57 H110 O5 N1  | 1.0926 | 1.1237 | 0.0043 | 0.0149 |
| pos_1423 | TG(16:0/16:0/22:5)  | pos | C57 H104 O6 N1  | 0.9956 | 1.1039 | 0.0203 | 0.0416 |
| pos_1429 | TG(16:1/18:1/20:4)  | pos | C57 H98 O6 Na1  | 0.9845 | 1.0919 | 0.0049 | 0.0159 |
| pos_1442 | TG(16:0/16:0/23:0)  | pos | C58 H116 O6 N1  | 1.1885 | 1.1666 | 0.0427 | 0.0727 |

---

# Supplementary Material

|          |                     |     |                 |        |        |        |        |
|----------|---------------------|-----|-----------------|--------|--------|--------|--------|
| pos_1452 | TG(19:0/18:1/18:1)  | pos | C58 H112 O6 N1  | 0.9872 | 1.0965 | 0.0080 | 0.0216 |
| pos_1470 | TG(18:3/17:1/20:4)  | pos | C58 H97 O6      | 1.1071 | 1.1113 | 0.0159 | 0.0348 |
| pos_1474 | TG(16:0/16:0/24:0)  | pos | C59 H118 O6 N1  | 1.0853 | 1.0908 | 0.0398 | 0.0690 |
| pos_1499 | TG(16:0e/18:1/22:1) | pos | C59 H116 O5 N1  | 1.0230 | 1.0678 | 0.0002 | 0.0060 |
| pos_1508 | TG(18:0e/16:0/22:5) | pos | C59 H110 O5 N1  | 0.9564 | 1.0893 | 0.0198 | 0.0410 |
| pos_1510 | TG(18:0/16:0/22:6)  | pos | C59 H102 O6 Na1 | 0.9272 | 1.0659 | 0.0033 | 0.0130 |
| pos_1515 | TG(18:1/18:1/20:5)  | pos | C59 H100 O6 Na1 | 0.9351 | 1.0654 | 0.0038 | 0.0142 |
| pos_1529 | TG(15:0/20:4/22:6)  | pos | C60 H96 O6 Na1  | 1.2033 | 1.1318 | 0.0103 | 0.0255 |
| pos_1534 | TG(16:0e/18:1/23:0) | pos | C60 H120 O5 N1  | 1.0510 | 1.0855 | 0.0005 | 0.0064 |
| pos_1548 | TG(18:1/17:1/22:6)  | pos | C60 H100 O6 Na1 | 1.0526 | 1.0830 | 0.0061 | 0.0183 |
| pos_1562 | TG(18:1/20:5/20:5)  | pos | C61 H97 O6      | 1.0705 | 1.0976 | 0.0256 | 0.0494 |
| pos_1563 | TG(14:0/22:6/22:6)  | pos | C61 H95 O6      | 1.5794 | 1.1794 | 0.0073 | 0.0206 |
| pos_1589 | TG(18:1/18:1/22:6)  | pos | C61 H103 O6     | 1.0639 | 1.1476 | 0.0293 | 0.0546 |
| pos_1592 | TG(18:1/18:3/22:5)  | pos | C61 H101 O6     | 2.4434 | 1.3183 | 0.0027 | 0.0114 |
| pos_1601 | TG(15:0/22:5/22:6)  | pos | C62 H98 O6 Na1  | 0.9228 | 1.0902 | 0.0132 | 0.0302 |
| pos_1630 | TG(18:1/20:4/22:6)  | pos | C63 H100 O6 Na1 | 0.9449 | 1.0904 | 0.0314 | 0.0574 |
| pos_1636 | TG(16:1/22:6/22:6)  | pos | C63 H97 O6      | 1.7935 | 1.2249 | 0.0022 | 0.0103 |
| pos_1662 | TG(20:1/18:1/22:6)  | pos | C63 H106 O6 Na1 | 0.9486 | 1.0743 | 0.0040 | 0.0145 |
| pos_1669 | TG(22:5/17:1/22:6)  | pos | C64 H100 O6 Na1 | 0.9904 | 1.0842 | 0.0088 | 0.0227 |
| pos_1670 | TG(17:0/22:6/22:6)  | pos | C64 H100 O6 Na1 | 1.1400 | 1.1201 | 0.0026 | 0.0112 |
| pos_1695 | TG(18:1/22:5/22:5)  | pos | C65 H105 O6     | 0.9486 | 1.0743 | 0.0040 | 0.0145 |
| pos_1728 | TG(15:0/24:1/24:1)  | pos | C66 H124 O6 Li1 | 1.9264 | 1.3653 | 0.0006 | 0.0064 |
| pos_1737 | TG(24:1/17:1/22:4)  | pos | C66 H120 O6 N1  | 1.0614 | 1.0994 | 0.0242 | 0.0475 |

|          |                         |     |                 |        |        |        |        |
|----------|-------------------------|-----|-----------------|--------|--------|--------|--------|
| pos_1758 | TG(20:2/22:6/22:6)      | pos | C67 H102 O6 Na1 | 1.0076 | 1.1001 | 0.0139 | 0.0311 |
| pos_1760 | TG(20:3/22:6/22:6)      | pos | C67 H101 O6     | 1.0593 | 1.1017 | 0.0068 | 0.0194 |
| pos_1935 | ZyE(20:4)               | pos | C47 H75 O2      | 1.8443 | 1.3519 | 0.0006 | 0.0064 |
| pos_1936 | ZyE(20:5)               | pos | C47 H73 O2      | 2.3564 | 1.4766 | 0.0000 | 0.0010 |
| pos_1937 | ZyE(22:4)               | pos | C49 H82 O2 N1   | 1.7665 | 1.2805 | 0.0003 | 0.0063 |
| pos_1938 | ZyE(22:5)               | pos | C49 H77 O2      | 1.6941 | 1.2915 | 0.0007 | 0.0064 |
| pos_1939 | ZyE(22:6)               | pos | C49 H75 O2      | 2.2807 | 1.4357 | 0.0000 | 0.0017 |
| neg_21   | CL(23:1/14:0/16:0/24:1) | neg | C86 H162 O17 P2 | 0.9851 | 1.0472 | 0.0010 | 0.0083 |
| neg_35   | CL(23:0/18:1/18:1/22:3) | neg | C90 H164 O17 P2 | 2.1806 | 1.4290 | 0.0035 | 0.0161 |
| neg_44   | Cer(d16:2/19:1)         | neg | C36 H66 O5 N1   | 1.0563 | 1.0776 | 0.0082 | 0.0290 |
| neg_46   | Cer(d16:1/21:0)         | neg | C38 H74 O5 N1   | 1.0440 | 1.0590 | 0.0002 | 0.0049 |
| neg_47   | Cer(d16:2/21:1)         | neg | C38 H70 O5 N1   | 0.9447 | 1.0476 | 0.0011 | 0.0087 |
| neg_49   | Cer(d16:1/22:0+O)       | neg | C38 H74 O4 N1   | 1.5526 | 1.1595 | 0.0004 | 0.0067 |
| neg_50   | Cer(d16:2/23:1)         | neg | C40 H74 O5 N1   | 1.0155 | 1.0521 | 0.0006 | 0.0072 |
| neg_51   | Cer(d18:0/22:0)         | neg | C41 H82 O5 N1   | 1.7044 | 1.1899 | 0.0009 | 0.0083 |
| neg_58   | Cer(d18:0/24:1)         | neg | C43 H84 O5 N1   | 1.8761 | 1.2105 | 0.0002 | 0.0047 |
| neg_61   | Cer(d19:1/24:0)         | neg | C44 H86 O5 N1   | 1.3783 | 1.1893 | 0.0208 | 0.0561 |
| neg_62   | Cer(d19:1/24:1)         | neg | C44 H84 O5 N1   | 1.1782 | 1.1541 | 0.0496 | 0.1051 |
| neg_65   | Cer(m18:0/18:1+O)       | neg | C37 H72 O5 N1   | 1.0757 | 1.0565 | 0.0007 | 0.0080 |
| neg_66   | Cer(t16:1/24:1)         | neg | C41 H78 O6 N1   | 1.3694 | 1.1124 | 0.0002 | 0.0060 |
| neg_67   | Cer(t18:0/24:1)         | neg | C43 H84 O6 N1   | 1.1639 | 1.0817 | 0.0003 | 0.0062 |
| neg_70   | CerG2GNAc1(d20:2/17:0)  | neg | C57 H102 O18 N2 | 1.1897 | 1.0922 | 0.0016 | 0.0107 |
| neg_81   | GM3(m22:0/24:0)         | neg | C69 H128 O20 N2 | 1.2791 | 1.1556 | 0.0409 | 0.0934 |

# Supplementary Material

|         |                      |     |                  |        |        |        |        |
|---------|----------------------|-----|------------------|--------|--------|--------|--------|
| neg_82  | Hex1Cer(d17:0/16:1)  | neg | C40 H76 O10 N1   | 1.2898 | 1.1462 | 0.0250 | 0.0637 |
| neg_83  | Hex1Cer(d16:0/18:1)  | neg | C41 H78 O10 N1   | 1.3726 | 1.1157 | 0.0053 | 0.0216 |
| neg_84  | Hex1Cer(d21:0/17:1)  | neg | C45 H86 O10 N1   | 1.0853 | 1.0678 | 0.0018 | 0.0112 |
| neg_88  | Hex1Cer(t20:1/18:1)  | neg | C45 H84 O11 N1   | 0.9401 | 1.0497 | 0.0011 | 0.0086 |
| neg_102 | LPE(20:0)            | neg | C25 H51 O7 N1 P1 | 1.2716 | 1.0991 | 0.0013 | 0.0095 |
| neg_130 | LdMePE(14:0e)        | neg | C21 H45 O6 N1 P1 | 1.1354 | 1.0809 | 0.0008 | 0.0083 |
| neg_133 | LdMePE(16:0e)        | neg | C23 H49 O6 N1 P1 | 1.4006 | 1.0976 | 0.0001 | 0.0033 |
| neg_135 | LdMePE(16:1e)        | neg | C23 H47 O6 N1 P1 | 1.3382 | 1.1040 | 0.0004 | 0.0066 |
| neg_136 | LdMePE(17:0)         | neg | C24 H49 O7 N1 P1 | 1.1077 | 1.0934 | 0.0093 | 0.0317 |
| neg_138 | LdMePE(18:0)         | neg | C25 H51 O7 N1 P1 | 1.3573 | 1.1160 | 0.0005 | 0.0071 |
| neg_139 | LdMePE(18:0e)        | neg | C25 H53 O6 N1 P1 | 1.6108 | 1.1351 | 0.0000 | 0.0009 |
| neg_140 | LdMePE(18:1e)        | neg | C25 H51 O6 N1 P1 | 1.4087 | 1.1110 | 0.0003 | 0.0063 |
| neg_143 | LdMePE(19:0)         | neg | C26 H53 O7 N1 P1 | 1.4270 | 1.1374 | 0.0019 | 0.0114 |
| neg_146 | LdMePE(20:0e)        | neg | C27 H57 O6 N1 P1 | 2.0043 | 1.2752 | 0.0000 | 0.0006 |
| neg_155 | LdMePE(24:1)         | neg | C31 H61 O7 N1 P1 | 1.6310 | 1.2328 | 0.0023 | 0.0125 |
| neg_162 | MGDG(12:0e/20:0)     | neg | C43 H83 O11      | 1.0032 | 1.0413 | 0.0000 | 0.0015 |
| neg_167 | MGDG(18:1/16:0p)     | neg | C45 H83 O11      | 1.0538 | 1.0617 | 0.0006 | 0.0072 |
| neg_191 | MLCL(14:2/18:0/18:0) | neg | C59 H110 O16 P2  | 1.2603 | 1.0921 | 0.0010 | 0.0083 |
| neg_197 | MLCL(14:2/20:0/20:0) | neg | C63 H118 O16 P2  | 1.4725 | 1.1725 | 0.0025 | 0.0131 |
| neg_204 | MLCL(14:2/22:0/22:0) | neg | C67 H126 O16 P2  | 1.5548 | 1.2101 | 0.0049 | 0.0207 |
| neg_208 | MLCL(14:2/24:1/24:1) | neg | C71 H130 O16 P2  | 1.6050 | 1.1829 | 0.0025 | 0.0132 |
| neg_215 | PC(14:1e/14:0)       | neg | C37 H73 O9 N1 P1 | 0.9561 | 1.0668 | 0.0150 | 0.0449 |
| neg_219 | PC(16:1e/14:0)       | neg | C39 H77 O9 N1 P1 | 0.9837 | 1.0493 | 0.0002 | 0.0060 |

|         |                |     |                   |        |        |        |        |
|---------|----------------|-----|-------------------|--------|--------|--------|--------|
| neg_222 | PC(16:0e/16:1) | neg | C41 H81 O9 N1 P1  | 0.9318 | 1.0422 | 0.0004 | 0.0067 |
| neg_229 | PC(17:0/18:1)  | neg | C44 H85 O10 N1 P1 | 1.1179 | 1.0718 | 0.0038 | 0.0173 |
| neg_231 | PC(18:2e/17:1) | neg | C44 H83 O9 N1 P1  | 0.9958 | 1.0600 | 0.0016 | 0.0107 |
| neg_232 | PC(20:1e/16:0) | neg | C45 H89 O9 N1 P1  | 1.1728 | 1.0848 | 0.0021 | 0.0122 |
| neg_233 | PC(18:1e/18:1) | neg | C43 H83 O7 N1 P1  | 0.9329 | 1.0579 | 0.0087 | 0.0302 |
| neg_242 | PC(18:1e/20:5) | neg | C47 H83 O9 N1 P1  | 1.0016 | 1.0536 | 0.0012 | 0.0092 |
| neg_244 | PC(17:0/22:4)  | neg | C48 H87 O10 N1 P1 | 0.9068 | 1.0465 | 0.0016 | 0.0107 |
| neg_249 | PC(20:0/20:5)  | neg | C49 H87 O10 N1 P1 | 1.4222 | 1.1653 | 0.0102 | 0.0336 |
| neg_259 | PC(30:1/20:4)  | neg | C57 H103 O8 N1 P1 | 1.1915 | 1.1220 | 0.0357 | 0.0840 |
| neg_260 | PC(30:1/20:5)  | neg | C57 H101 O8 N1 P1 | 1.2609 | 1.1343 | 0.0428 | 0.0951 |
| neg_269 | PC(32:1/22:4)  | neg | C61 H111 O8 N1 P1 | 1.2906 | 1.1247 | 0.0094 | 0.0318 |
| neg_270 | PC(34:1/20:4)  | neg | C61 H111 O8 N1 P1 | 1.1595 | 1.1147 | 0.0260 | 0.0658 |
| neg_275 | PC(34:1/22:6)  | neg | C63 H111 O8 N1 P1 | 1.3811 | 1.1555 | 0.0170 | 0.0481 |
| neg_288 | PE(18:0e/16:1) | neg | C39 H77 O7 N1 P1  | 0.9368 | 1.0513 | 0.0010 | 0.0083 |
| neg_290 | PE(16:0/18:2)  | neg | C39 H73 O8 N1 P1  | 1.4772 | 1.1065 | 0.0234 | 0.0613 |
| neg_303 | PE(18:0/18:2)  | neg | C41 H77 O8 N1 P1  | 1.0385 | 1.0914 | 0.0468 | 0.1008 |
| neg_363 | PE(20:0e/22:6) | neg | C47 H83 O7 N1 P1  | 0.9426 | 1.0606 | 0.0071 | 0.0264 |
| neg_384 | PEt(22:2/22:6) | neg | C49 H80 O8 N0 P1  | 1.1942 | 1.0906 | 0.0106 | 0.0344 |
| neg_386 | PG(15:0/15:0)  | neg | C36 H70 O10 N0 P1 | 1.6351 | 1.1350 | 0.0460 | 0.0995 |
| neg_388 | PG(15:0/16:1)  | neg | C37 H70 O10 N0 P1 | 3.3701 | 8.1772 | 0.0099 | 0.0330 |
| neg_464 | PS(18:1/18:1)  | neg | C42 H77 O10 N1 P1 | 1.2415 | 1.1145 | 0.0459 | 0.0995 |
| neg_475 | PS(18:0/20:4)  | neg | C44 H77 O10 N1 P1 | 1.3570 | 1.1084 | 0.0021 | 0.0119 |
| neg_479 | PS(18:0/20:5)  | neg | C44 H75 O10 N1 P1 | 1.1563 | 1.0872 | 0.0287 | 0.0710 |

## Supplementary Material

|         |                   |     |                   |        |        |        |        |
|---------|-------------------|-----|-------------------|--------|--------|--------|--------|
| neg_490 | PS(18:0/22:4)     | neg | C46 H81 O10 N1 P1 | 1.1648 | 1.0854 | 0.0048 | 0.0207 |
| neg_521 | PS(20:3/22:6)     | neg | C48 H75 O10 N1 P1 | 1.2497 | 1.1085 | 0.0134 | 0.0408 |
| neg_532 | SM(d16:1/20:0)    | neg | C42 H84 O8 N2 P1  | 0.9265 | 1.0365 | 0.0001 | 0.0038 |
| neg_545 | dMePE(16:1e/14:0) | neg | C37 H73 O7 N1 P1  | 1.1848 | 1.0869 | 0.0010 | 0.0083 |
| neg_546 | dMePE(16:1/14:1)  | neg | C37 H69 O8 N1 P1  | 1.6117 | 1.1203 | 0.0385 | 0.0894 |
| neg_552 | dMePE(16:0e/16:1) | neg | C39 H77 O7 N1 P1  | 0.9368 | 1.0513 | 0.0010 | 0.0083 |
| neg_555 | dMePE(16:1e/16:1) | neg | C39 H75 O7 N1 P1  | 1.2141 | 1.1046 | 0.0079 | 0.0286 |
| neg_572 | dMePE(16:1/20:4)  | neg | C43 H75 O8 N1 P1  | 1.0185 | 1.1009 | 0.0393 | 0.0909 |
| neg_583 | dMePE(18:0e/20:4) | neg | C45 H83 O7 N1 P1  | 1.2539 | 1.0907 | 0.0004 | 0.0069 |
| neg_595 | dMePE(18:0e/22:6) | neg | C47 H83 O7 N1 P1  | 0.9571 | 1.0615 | 0.0060 | 0.0239 |
| neg_604 | phSM(d20:0/14:0)  | neg | C40 H82 O9 N2 P1  | 1.0143 | 1.0606 | 0.0002 | 0.0047 |

**1.4 Table S4. Lower abundant levels of lipid species in simple-packaged (SP) pike eels in comparison with fresh (FE) pike eels via LC-MS/MS analysis.**

| ID      | Lipids              | Mode | Formula              | VIP    | FC     | <i>P</i> value | FDR    |
|---------|---------------------|------|----------------------|--------|--------|----------------|--------|
| pos_4   | BisMePA(10:1e/18:1) | pos  | C33 H63 O7 N0 P1 Na1 | 1.4030 | 0.8426 | 0.0002         | 0.0060 |
| pos_26  | BisMePA(22:5/22:6)  | pos  | C49 H79 O8 N1 P1     | 0.9991 | 0.9008 | 0.0204         | 0.0416 |
| pos_27  | BisMePA(22:6/22:6)  | pos  | C49 H77 O8 N1 P1     | 1.0486 | 0.9178 | 0.0014         | 0.0084 |
| pos_28  | BisMePA(30:0/15:0)  | pos  | C50 H103 O8 N1 P1    | 1.3911 | 0.8425 | 0.0034         | 0.0131 |
| pos_126 | DG(18:4/12:0)       | pos  | C33 H56 O5 Na1       | 1.9383 | 0.6019 | 0.0471         | 0.0782 |
| pos_133 | DG(16:1e/16:0)      | pos  | C35 H68 O4 Na1       | 0.9529 | 0.9328 | 0.0137         | 0.0310 |
| pos_134 | DG(16:1/16:1)       | pos  | C35 H68 O5 N1        | 1.3031 | 0.8704 | 0.0074         | 0.0208 |
| pos_136 | DG(18:4/14:0)       | pos  | C35 H64 O5 N1        | 1.3683 | 0.8506 | 0.0068         | 0.0195 |
| pos_137 | DG(12:0/20:5)       | pos  | C35 H58 O5 Na1       | 1.4791 | 0.7266 | 0.0475         | 0.0788 |
| pos_142 | DG(17:1/16:1)       | pos  | C36 H70 O5 N1        | 1.1886 | 0.8863 | 0.0081         | 0.0219 |
| pos_144 | DG(18:4/15:0)       | pos  | C36 H66 O5 N1        | 1.1108 | 0.8945 | 0.0035         | 0.0135 |
| pos_149 | DG(16:1/18:1)       | pos  | C37 H72 O5 N1        | 0.9429 | 0.9369 | 0.0109         | 0.0267 |
| pos_150 | DG(16:1/18:2)       | pos  | C37 H70 O5 N1        | 1.2029 | 0.8958 | 0.0021         | 0.0099 |
| pos_152 | DG(16:1/18:3)       | pos  | C37 H68 O5 N1        | 1.1869 | 0.8938 | 0.0069         | 0.0195 |
| pos_153 | DG(18:4/16:0)       | pos  | C37 H65 O5           | 1.2271 | 0.8851 | 0.0027         | 0.0113 |
| pos_154 | DG(18:3e/16:1)      | pos  | C37 H67 O4           | 1.0633 | 0.8742 | 0.0186         | 0.0390 |
| pos_155 | DG(18:4/16:1)       | pos  | C37 H63 O5           | 1.2441 | 0.8812 | 0.0102         | 0.0254 |
| pos_156 | DG(14:0/20:5)       | pos  | C37 H63 O5           | 1.1430 | 0.9062 | 0.0014         | 0.0084 |
| pos_157 | DG(20:5/14:1)       | pos  | C37 H64 O5 N1        | 2.9119 | 0.2345 | 0.0008         | 0.0066 |
| pos_158 | DG(12:0/22:6)       | pos  | C37 H64 O5 N1        | 1.2813 | 0.8690 | 0.0011         | 0.0075 |
| pos_162 | DG(17:1/18:1)       | pos  | C38 H74 O5 N1        | 1.0515 | 0.9212 | 0.0010         | 0.0072 |

# Supplementary Material

|         |               |     |                |        |        |        |        |
|---------|---------------|-----|----------------|--------|--------|--------|--------|
| pos_165 | DG(15:0/20:4) | pos | C38 H70 O5 N1  | 1.5102 | 0.8239 | 0.0008 | 0.0066 |
| pos_167 | DG(22:6/13:0) | pos | C38 H66 O5 N1  | 1.1299 | 0.9004 | 0.0039 | 0.0144 |
| pos_171 | DG(18:1/18:1) | pos | C39 H72 O5 Na1 | 1.0026 | 0.9247 | 0.0014 | 0.0085 |
| pos_172 | DG(18:0/18:2) | pos | C39 H76 O5 N1  | 0.9988 | 0.8975 | 0.0317 | 0.0580 |
| pos_173 | DG(18:1/18:2) | pos | C39 H74 O5 N1  | 1.1307 | 0.9125 | 0.0020 | 0.0099 |
| pos_180 | DG(16:0/20:5) | pos | C39 H70 O5 N1  | 1.2009 | 0.9051 | 0.0009 | 0.0070 |
| pos_183 | DG(22:5/14:1) | pos | C39 H64 O5 Na1 | 1.3335 | 0.8571 | 0.0021 | 0.0099 |
| pos_184 | DG(16:1/20:5) | pos | C39 H68 O5 N1  | 1.3761 | 0.8686 | 0.0013 | 0.0082 |
| pos_185 | DG(18:4/18:3) | pos | C39 H66 O5 N1  | 1.3765 | 0.8484 | 0.0020 | 0.0099 |
| pos_186 | DG(22:6/14:1) | pos | C39 H66 O5 N1  | 1.3200 | 0.8714 | 0.0012 | 0.0076 |
| pos_187 | DG(18:4/18:4) | pos | C39 H61 O5     | 1.3152 | 0.8462 | 0.0048 | 0.0158 |
| pos_188 | DG(22:6/14:2) | pos | C39 H64 O5 N1  | 1.1344 | 0.8602 | 0.0110 | 0.0268 |
| pos_189 | DG(22:6/14:3) | pos | C39 H62 O5 N1  | 1.4347 | 0.8542 | 0.0002 | 0.0061 |
| pos_193 | DG(17:1/20:2) | pos | C40 H76 O5 N1  | 1.0381 | 0.9036 | 0.0212 | 0.0429 |
| pos_195 | DG(15:0/22:4) | pos | C40 H74 O5 N1  | 1.0278 | 0.9045 | 0.0186 | 0.0390 |
| pos_197 | DG(17:1/20:4) | pos | C40 H72 O5 N1  | 1.3786 | 0.8538 | 0.0008 | 0.0067 |
| pos_198 | DG(15:0/22:5) | pos | C40 H69 O5     | 1.2044 | 0.8869 | 0.0012 | 0.0078 |
| pos_199 | DG(17:0/20:5) | pos | C40 H72 O5 N1  | 1.8041 | 0.8743 | 0.0001 | 0.0060 |
| pos_200 | DG(17:1/20:5) | pos | C40 H70 O5 N1  | 1.4254 | 0.8593 | 0.0001 | 0.0052 |
| pos_203 | DG(20:1/18:1) | pos | C41 H80 O5 N1  | 0.9417 | 0.9332 | 0.0041 | 0.0147 |
| pos_205 | DG(18:1/20:2) | pos | C41 H78 O5 N1  | 1.1625 | 0.9001 | 0.0018 | 0.0095 |
| pos_207 | DG(16:0/22:4) | pos | C41 H76 O5 N1  | 0.9468 | 0.9351 | 0.0019 | 0.0098 |
| pos_210 | DG(18:0/20:5) | pos | C41 H74 O5 N1  | 1.0281 | 0.9271 | 0.0012 | 0.0077 |



|         |               |     |                |        |        |        |        |
|---------|---------------|-----|----------------|--------|--------|--------|--------|
| pos_214 | DG(16:1/22:5) | pos | C41 H69 O5     | 1.3322 | 0.8687 | 0.0034 | 0.0132 |
| pos_215 | DG(16:0/22:6) | pos | C41 H72 O5 N1  | 1.0974 | 0.9266 | 0.0011 | 0.0073 |
| pos_217 | DG(16:1/22:6) | pos | C41 H67 O5     | 1.3778 | 0.8607 | 0.0040 | 0.0145 |
| pos_219 | DG(18:4/20:5) | pos | C41 H63 O5     | 1.3320 | 0.8573 | 0.0025 | 0.0110 |
| pos_221 | DG(17:1/22:2) | pos | C42 H80 O5 N1  | 1.0546 | 0.8728 | 0.0277 | 0.0524 |
| pos_222 | DG(19:0/20:3) | pos | C42 H80 O5 N1  | 1.0746 | 0.9026 | 0.0234 | 0.0463 |
| pos_225 | DG(17:0/22:5) | pos | C42 H76 O5 N1  | 1.1271 | 0.9033 | 0.0006 | 0.0064 |
| pos_226 | DG(17:1/22:4) | pos | C42 H73 O5     | 1.0436 | 0.9228 | 0.0005 | 0.0064 |
| pos_227 | DG(17:1/22:5) | pos | C42 H74 O5 N1  | 0.9654 | 0.9352 | 0.0008 | 0.0067 |
| pos_228 | DG(17:0/22:6) | pos | C42 H74 O5 N1  | 1.0631 | 0.9182 | 0.0081 | 0.0218 |
| pos_229 | DG(17:1/22:6) | pos | C42 H72 O5 N1  | 1.2269 | 0.8971 | 0.0011 | 0.0072 |
| pos_231 | DG(18:4/22:6) | pos | C43 H65 O5     | 1.3923 | 0.8538 | 0.0004 | 0.0063 |
| pos_233 | DG(18:1/22:2) | pos | C43 H82 O5 N1  | 0.9492 | 0.9235 | 0.0083 | 0.0221 |
| pos_237 | DG(18:1/22:4) | pos | C43 H78 O5 N1  | 1.2404 | 0.8932 | 0.0010 | 0.0071 |
| pos_239 | DG(18:0/22:5) | pos | C43 H78 O5 N1  | 0.9624 | 0.9348 | 0.0020 | 0.0099 |
| pos_240 | DG(18:1/22:5) | pos | C43 H73 O5     | 1.2469 | 0.8949 | 0.0010 | 0.0072 |
| pos_241 | DG(18:0/22:6) | pos | C43 H76 O5 N1  | 0.9601 | 0.9411 | 0.0012 | 0.0077 |
| pos_242 | DG(20:3/20:4) | pos | C43 H70 O5 Na1 | 1.3846 | 0.8523 | 0.0020 | 0.0099 |
| pos_243 | DG(22:5/18:2) | pos | C43 H71 O5     | 1.3508 | 0.8491 | 0.0052 | 0.0165 |
| pos_244 | DG(18:1/22:6) | pos | C43 H74 O5 N1  | 1.2251 | 0.9101 | 0.0007 | 0.0065 |
| pos_245 | DG(18:3/22:5) | pos | C43 H72 O5 N1  | 1.4849 | 0.8285 | 0.0020 | 0.0099 |
| pos_246 | DG(18:2/22:6) | pos | C43 H72 O5 N1  | 1.3221 | 0.8818 | 0.0010 | 0.0070 |
| pos_248 | DG(18:3/22:6) | pos | C43 H70 O5 N1  | 2.3756 | 0.7956 | 0.0000 | 0.0009 |

# Supplementary Material

|         |               |     |                |        |        |        |        |
|---------|---------------|-----|----------------|--------|--------|--------|--------|
| pos_249 | DG(19:0/22:5) | pos | C44 H80 O5 N1  | 0.9739 | 0.9253 | 0.0007 | 0.0064 |
| pos_250 | DG(19:1/22:5) | pos | C44 H78 O5 N1  | 1.3012 | 0.8625 | 0.0040 | 0.0145 |
| pos_252 | DG(19:1/22:6) | pos | C44 H76 O5 N1  | 1.2735 | 0.8843 | 0.0010 | 0.0071 |
| pos_254 | DG(20:5/22:6) | pos | C45 H67 O5     | 1.2849 | 0.8895 | 0.0007 | 0.0066 |
| pos_258 | DG(20:1/22:4) | pos | C45 H82 O5 N1  | 0.9887 | 0.9238 | 0.0039 | 0.0144 |
| pos_260 | DG(20:0/22:5) | pos | C45 H82 O5 N1  | 1.2797 | 0.8844 | 0.0488 | 0.0805 |
| pos_262 | DG(20:0/22:6) | pos | C45 H80 O5 N1  | 1.1260 | 0.9172 | 0.0076 | 0.0210 |
| pos_264 | DG(20:1/22:6) | pos | C45 H78 O5 N1  | 1.1820 | 0.9071 | 0.0008 | 0.0067 |
| pos_266 | DG(20:2/22:6) | pos | C45 H76 O5 N1  | 1.2837 | 0.8856 | 0.0014 | 0.0085 |
| pos_267 | DG(22:5/20:4) | pos | C45 H74 O5 N1  | 1.1483 | 0.8829 | 0.0136 | 0.0309 |
| pos_269 | DG(22:5/21:1) | pos | C46 H82 O5 N1  | 1.2445 | 0.8709 | 0.0030 | 0.0123 |
| pos_270 | DG(22:6/21:0) | pos | C46 H82 O5 N1  | 1.1478 | 0.8894 | 0.0040 | 0.0145 |
| pos_271 | DG(22:6/21:1) | pos | C46 H80 O5 N1  | 1.2554 | 0.8591 | 0.0050 | 0.0161 |
| pos_272 | DG(22:5/22:5) | pos | C47 H73 O5     | 1.4611 | 0.8311 | 0.0008 | 0.0067 |
| pos_274 | DG(22:5/22:6) | pos | C47 H71 O5     | 1.3791 | 0.8673 | 0.0008 | 0.0067 |
| pos_279 | DG(22:0/22:6) | pos | C47 H84 O5 N1  | 1.1429 | 0.8894 | 0.0091 | 0.0233 |
| pos_282 | DG(22:4/22:4) | pos | C47 H80 O5 N1  | 1.0254 | 0.9075 | 0.0070 | 0.0198 |
| pos_284 | DG(22:4/22:5) | pos | C47 H78 O5 N1  | 1.2472 | 0.8792 | 0.0020 | 0.0099 |
| pos_285 | DG(22:6/23:1) | pos | C48 H84 O5 N1  | 1.1416 | 0.8935 | 0.0043 | 0.0149 |
| pos_286 | DG(24:1/22:5) | pos | C49 H88 O5 N1  | 1.0915 | 0.9027 | 0.0023 | 0.0103 |
| pos_287 | DG(24:1/22:6) | pos | C49 H86 O5 N1  | 1.1554 | 0.9041 | 0.0027 | 0.0114 |
| pos_288 | DG(24:2/22:6) | pos | C49 H84 O5 N1  | 1.2313 | 0.8527 | 0.0229 | 0.0456 |
| pos_292 | DG(37:0/16:0) | pos | C56 H110 O5 K1 | 0.9505 | 0.9086 | 0.0238 | 0.0469 |

|         |                  |     |                      |        |        |        |        |
|---------|------------------|-----|----------------------|--------|--------|--------|--------|
| pos_351 | LPC(20:4)        | pos | C28 H50 O7 N1 P1 Na1 | 1.1249 | 0.8808 | 0.0087 | 0.0225 |
| pos_353 | LPC(20:5)        | pos | C28 H48 O7 N1 P1 Na1 | 1.1820 | 0.9243 | 0.0033 | 0.0129 |
| pos_386 | LPE(22:6)        | pos | C27 H44 O7 N1 P1 Na1 | 0.9528 | 0.9259 | 0.0022 | 0.0103 |
| pos_432 | MePC(20:4/14:3)  | pos | C43 H72 O8 N1 P1 Na1 | 1.1319 | 0.8935 | 0.0004 | 0.0063 |
| pos_445 | MePC(16:1/20:5)  | pos | C45 H78 O8 N1 P1 Na1 | 1.0048 | 0.9101 | 0.0113 | 0.0273 |
| pos_447 | MePC(18:4/18:3)  | pos | C45 H76 O8 N1 P1 Na1 | 1.5828 | 0.8478 | 0.0000 | 0.0013 |
| pos_449 | MePC(22:6/14:2)  | pos | C45 H74 O8 N1 P1 Na1 | 1.1446 | 0.9047 | 0.0004 | 0.0063 |
| pos_458 | MePC(16:1/22:6)  | pos | C47 H80 O8 N1 P1 Na1 | 1.1524 | 0.8870 | 0.0009 | 0.0067 |
| pos_459 | MePC(18:4/20:4)  | pos | C47 H78 O8 N1 P1 Na1 | 1.6161 | 0.8321 | 0.0004 | 0.0063 |
| pos_460 | MePC(16:2e/22:6) | pos | C47 H80 O7 N1 P1 Na1 | 1.0766 | 0.8866 | 0.0035 | 0.0134 |
| pos_461 | MePC(18:4/20:5)  | pos | C47 H76 O8 N1 P1 Na1 | 1.1281 | 0.9111 | 0.0005 | 0.0064 |
| pos_468 | MePC(18:2/22:6)  | pos | C49 H82 O8 N1 P1 Na1 | 1.7305 | 0.8140 | 0.0001 | 0.0060 |
| pos_469 | MePC(18:3e/22:6) | pos | C49 H82 O7 N1 P1 Na1 | 1.1237 | 0.9150 | 0.0017 | 0.0095 |
| pos_474 | MePC(20:3/22:6)  | pos | C51 H84 O8 N1 P1 Na1 | 0.9276 | 0.9222 | 0.0079 | 0.0216 |
| pos_505 | PC(16:0/12:0)    | pos | C36 H73 O8 N1 P1     | 1.3236 | 0.8703 | 0.0017 | 0.0095 |
| pos_512 | PC(16:0/14:0)    | pos | C38 H77 O8 N1 P1     | 0.8592 | 0.9266 | 0.0431 | 0.0732 |
| pos_565 | PC(11:0/22:6)    | pos | C41 H71 O8 N1 P1     | 1.0541 | 0.9247 | 0.0003 | 0.0063 |
| pos_632 | PC(18:4/18:3)    | pos | C44 H75 O8 N1 P1     | 1.1023 | 0.8730 | 0.0279 | 0.0528 |
| pos_679 | PC(20:5/18:2)    | pos | C46 H78 O8 N1 P1 Na1 | 1.0129 | 0.9226 | 0.0083 | 0.0221 |
| pos_684 | PC(18:3/20:5)    | pos | C46 H76 O8 N1 P1 Na1 | 1.3545 | 0.8307 | 0.0017 | 0.0093 |
| pos_686 | PC(18:4/20:5)    | pos | C46 H74 O8 N1 P1 Na1 | 1.4873 | 0.8234 | 0.0063 | 0.0186 |
| pos_703 | PC(20:5/20:5)    | pos | C48 H76 O8 N1 P1 Na1 | 1.0943 | 0.9027 | 0.0004 | 0.0063 |
| pos_729 | PC(20:5/20:4)    | pos | C48 H78 O8 N1 P1 Na1 | 0.9805 | 0.8908 | 0.0174 | 0.0369 |

# Supplementary Material

|         |                |     |                      |        |        |        |        |
|---------|----------------|-----|----------------------|--------|--------|--------|--------|
| pos_743 | PC(20:5/22:6)  | pos | C50 H78 O8 N1 P1 Na1 | 1.0804 | 0.9184 | 0.0003 | 0.0063 |
| pos_763 | PC(22:4/22:6)  | pos | C52 H85 O8 N1 P1     | 1.0817 | 0.8907 | 0.0135 | 0.0306 |
| pos_764 | PC(22:5/22:6)  | pos | C52 H83 O8 N1 P1     | 0.9269 | 0.9256 | 0.0047 | 0.0156 |
| pos_765 | PC(22:6/22:6)  | pos | C52 H80 O8 N1 P1 Na1 | 0.9559 | 0.9340 | 0.0009 | 0.0070 |
| pos_790 | PE(16:1/18:2)  | pos | C39 H72 O8 N1 P1 Na1 | 1.0920 | 0.9131 | 0.0002 | 0.0061 |
| pos_821 | PE(16:1/22:6)  | pos | C43 H73 O8 N1 P1     | 1.0276 | 0.9308 | 0.0002 | 0.0062 |
| pos_835 | PE(18:1/22:6)  | pos | C45 H76 O8 N1 P1 Na1 | 0.8815 | 0.9440 | 0.0004 | 0.0063 |
| pos_837 | PE(18:2/22:6)  | pos | C45 H74 O8 N1 P1 Na1 | 1.1446 | 0.9047 | 0.0004 | 0.0063 |
| pos_839 | PE(18:3/22:6)  | pos | C45 H72 O8 N1 P1 Na1 | 1.0927 | 0.8885 | 0.0026 | 0.0112 |
| pos_840 | PE(20:4/22:6)  | pos | C47 H75 O8 N1 P1     | 1.0754 | 0.9204 | 0.0008 | 0.0067 |
| pos_841 | PE(20:5/22:6)  | pos | C47 H73 O8 N1 P1     | 1.1439 | 0.9050 | 0.0004 | 0.0063 |
| pos_842 | PE(20:3/22:5)  | pos | C47 H78 O8 N1 P1 Na1 | 1.5457 | 0.8404 | 0.0003 | 0.0063 |
| pos_843 | PE(20:3/22:6)  | pos | C47 H76 O8 N1 P1 Na1 | 1.1281 | 0.9111 | 0.0005 | 0.0064 |
| pos_844 | PE(22:4/22:6)  | pos | C49 H79 O8 N1 P1     | 0.9119 | 0.9099 | 0.0382 | 0.0669 |
| pos_845 | PE(22:5/22:6)  | pos | C49 H77 O8 N1 P1     | 1.0539 | 0.9170 | 0.0013 | 0.0082 |
| pos_846 | PE(22:6/22:6)  | pos | C49 H75 O8 N1 P1     | 1.1261 | 0.9114 | 0.0005 | 0.0064 |
| pos_847 | PEt(15:0/12:0) | pos | C32 H64 O8 N0 P1     | 1.2455 | 0.8881 | 0.0009 | 0.0070 |
| pos_848 | PEt(15:0/13:0) | pos | C33 H66 O8 N0 P1     | 1.2124 | 0.8829 | 0.0037 | 0.0140 |
| pos_849 | PEt(15:0/14:0) | pos | C34 H68 O8 N0 P1     | 1.0902 | 0.9177 | 0.0019 | 0.0099 |
| pos_850 | PEt(15:0/14:1) | pos | C34 H66 O8 N0 P1     | 1.1984 | 0.8952 | 0.0041 | 0.0145 |
| pos_852 | PEt(15:0/16:1) | pos | C36 H70 O8 N0 P1     | 1.1539 | 0.9072 | 0.0022 | 0.0103 |
| pos_853 | PEt(15:0/17:0) | pos | C37 H74 O8 N0 P1     | 1.1041 | 0.9159 | 0.0007 | 0.0065 |
| pos_854 | PEt(17:1/15:0) | pos | C37 H72 O8 N0 P1     | 1.2347 | 0.8946 | 0.0006 | 0.0064 |

|         |                |     |                  |        |        |        |        |
|---------|----------------|-----|------------------|--------|--------|--------|--------|
| pos_855 | PEt(18:0/15:0) | pos | C38 H76 O8 N0 P1 | 1.3537 | 0.8768 | 0.0003 | 0.0063 |
| pos_857 | PEt(15:0/18:2) | pos | C38 H72 O8 N0 P1 | 1.3860 | 0.8497 | 0.0025 | 0.0109 |
| pos_858 | PEt(15:0/19:0) | pos | C39 H78 O8 N0 P1 | 1.1166 | 0.9113 | 0.0004 | 0.0063 |
| pos_859 | PEt(19:1/15:0) | pos | C39 H76 O8 N0 P1 | 1.2100 | 0.8927 | 0.0009 | 0.0068 |
| pos_860 | PEt(20:0/15:0) | pos | C40 H80 O8 N0 P1 | 1.0679 | 0.9209 | 0.0033 | 0.0129 |
| pos_862 | PEt(15:0/20:1) | pos | C40 H78 O8 N0 P1 | 1.0626 | 0.9243 | 0.0005 | 0.0064 |
| pos_863 | PEt(15:0/20:2) | pos | C40 H76 O8 N0 P1 | 1.0778 | 0.9277 | 0.0001 | 0.0047 |
| pos_864 | PEt(15:0/21:0) | pos | C41 H82 O8 N0 P1 | 1.2101 | 0.8850 | 0.0004 | 0.0063 |
| pos_865 | PEt(15:0/22:0) | pos | C42 H84 O8 N0 P1 | 0.9865 | 0.9215 | 0.0020 | 0.0099 |
| pos_866 | PEt(15:0/22:1) | pos | C42 H82 O8 N0 P1 | 1.0665 | 0.9159 | 0.0026 | 0.0112 |
| pos_868 | PEt(15:0/22:5) | pos | C42 H74 O8 N0 P1 | 1.1849 | 0.9019 | 0.0015 | 0.0086 |
| pos_869 | PEt(15:0/22:6) | pos | C42 H72 O8 N0 P1 | 1.1979 | 0.9015 | 0.0029 | 0.0122 |
| pos_870 | PEt(15:0/24:1) | pos | C44 H86 O8 N0 P1 | 1.0531 | 0.9186 | 0.0006 | 0.0064 |
| pos_887 | PMe(16:0/12:0) | pos | C32 H64 O8 N0 P1 | 1.2455 | 0.8881 | 0.0009 | 0.0070 |
| pos_889 | PMe(16:0/14:0) | pos | C34 H68 O8 N0 P1 | 1.0902 | 0.9178 | 0.0019 | 0.0099 |
| pos_890 | PMe(16:0/14:1) | pos | C34 H66 O8 N0 P1 | 1.1978 | 0.8951 | 0.0041 | 0.0146 |
| pos_892 | PMe(16:0/16:1) | pos | C36 H70 O8 N0 P1 | 1.1572 | 0.9073 | 0.0022 | 0.0103 |
| pos_893 | PMe(16:0/17:0) | pos | C37 H74 O8 N0 P1 | 0.9453 | 0.9310 | 0.0012 | 0.0077 |
| pos_894 | PMe(17:1/16:0) | pos | C37 H72 O8 N0 P1 | 1.2388 | 0.8941 | 0.0006 | 0.0064 |
| pos_895 | PMe(18:0/16:0) | pos | C38 H76 O8 N0 P1 | 1.3537 | 0.8768 | 0.0003 | 0.0063 |
| pos_897 | PMe(16:0/18:2) | pos | C38 H72 O8 N0 P1 | 1.3761 | 0.8572 | 0.0031 | 0.0125 |
| pos_899 | PMe(19:1/16:0) | pos | C39 H76 O8 N0 P1 | 1.2271 | 0.8764 | 0.0059 | 0.0179 |
| pos_900 | PMe(20:0/16:0) | pos | C40 H80 O8 N0 P1 | 1.2087 | 0.8960 | 0.0003 | 0.0063 |

# Supplementary Material

|          |                    |     |                  |        |        |        |        |
|----------|--------------------|-----|------------------|--------|--------|--------|--------|
| pos_901  | PMe(18:0/18:1)     | pos | C40 H78 O8 N0 P1 | 1.3961 | 0.8440 | 0.0037 | 0.0140 |
| pos_902  | PMe(16:0/20:1)     | pos | C40 H78 O8 N0 P1 | 1.0626 | 0.9243 | 0.0005 | 0.0064 |
| pos_903  | PMe(16:0/20:2)     | pos | C40 H76 O8 N0 P1 | 1.0778 | 0.9277 | 0.0001 | 0.0047 |
| pos_904  | PMe(16:0/20:5)     | pos | C40 H70 O8 N0 P1 | 1.2459 | 0.8987 | 0.0006 | 0.0064 |
| pos_905  | PMe(16:0/21:0)     | pos | C41 H82 O8 N0 P1 | 1.2343 | 0.8810 | 0.0004 | 0.0063 |
| pos_906  | PMe(16:0/22:0)     | pos | C42 H84 O8 N0 P1 | 0.9865 | 0.9216 | 0.0020 | 0.0099 |
| pos_907  | PMe(16:0/22:1)     | pos | C42 H82 O8 N0 P1 | 1.1637 | 0.9043 | 0.0010 | 0.0072 |
| pos_909  | PMe(16:0/22:6)     | pos | C42 H72 O8 N0 P1 | 1.1979 | 0.9015 | 0.0029 | 0.0122 |
| pos_910  | PMe(16:0/24:1)     | pos | C44 H86 O8 N0 P1 | 1.0531 | 0.9187 | 0.0006 | 0.0064 |
| pos_1033 | TG(9:0/10:0/10:0)  | pos | C32 H60 O6 K1    | 1.5083 | 0.7993 | 0.0012 | 0.0077 |
| pos_1035 | TG(6:0/13:0/13:0)  | pos | C35 H66 O6 K1    | 1.1788 | 0.8889 | 0.0044 | 0.0151 |
| pos_1036 | TG(8:0/10:2/14:0)  | pos | C35 H63 O6       | 1.0653 | 0.8974 | 0.0093 | 0.0238 |
| pos_1037 | TG(8:0/11:2/14:0)  | pos | C36 H65 O6       | 1.2899 | 0.8640 | 0.0011 | 0.0075 |
| pos_1038 | TG(4:0/15:0/15:0)  | pos | C37 H70 O6 K1    | 1.1884 | 0.8996 | 0.0019 | 0.0099 |
| pos_1040 | TG(16:1/6:0/12:2)  | pos | C37 H65 O6       | 0.9975 | 0.9084 | 0.0098 | 0.0248 |
| pos_1044 | TG(16:0/8:0/11:2)  | pos | C38 H69 O6       | 0.9481 | 0.9321 | 0.0010 | 0.0072 |
| pos_1046 | TG(16:1/8:0/11:2)  | pos | C38 H67 O6       | 1.1317 | 0.9003 | 0.0006 | 0.0064 |
| pos_1047 | TG(14:0/10:3/11:2) | pos | C38 H63 O6       | 0.9568 | 0.9239 | 0.0018 | 0.0095 |
| pos_1049 | TG(16:0/10:0/10:2) | pos | C39 H71 O6       | 1.1003 | 0.8965 | 0.0153 | 0.0337 |
| pos_1051 | TG(12:1e/6:0/18:1) | pos | C39 H73 O5       | 1.0247 | 0.9198 | 0.0027 | 0.0114 |
| pos_1053 | TG(18:3e/8:0/10:0) | pos | C39 H71 O5       | 1.2613 | 0.8697 | 0.0025 | 0.0109 |
| pos_1061 | TG(14:1e/6:0/17:1) | pos | C40 H74 O5 Na1   | 1.0430 | 0.9228 | 0.0005 | 0.0064 |
| pos_1062 | TG(8:0/11:2/18:1)  | pos | C40 H71 O6       | 1.1330 | 0.9068 | 0.0004 | 0.0063 |

|          |                     |     |               |        |        |        |        |
|----------|---------------------|-----|---------------|--------|--------|--------|--------|
| pos_1064 | TG(14:1e/11:3/12:3) | pos | C40 H65 O5    | 2.7656 | 0.3360 | 0.0002 | 0.0061 |
| pos_1066 | TG(16:0/11:1/11:1)  | pos | C41 H75 O6    | 1.0348 | 0.9164 | 0.0074 | 0.0207 |
| pos_1068 | TG(12:1e/8:0/18:1)  | pos | C41 H77 O5    | 1.0379 | 0.9072 | 0.0038 | 0.0141 |
| pos_1069 | TG(18:1/10:1/10:1)  | pos | C41 H73 O6    | 1.1025 | 0.9001 | 0.0099 | 0.0249 |
| pos_1072 | TG(12:1e/10:4/16:0) | pos | C41 H74 O5 N1 | 1.1203 | 0.9197 | 0.0022 | 0.0103 |
| pos_1073 | TG(12:0e/6:0/20:5)  | pos | C41 H71 O5    | 1.0026 | 0.9247 | 0.0014 | 0.0085 |
| pos_1079 | TG(20:4e/8:0/10:4)  | pos | C41 H65 O5    | 1.5174 | 0.7393 | 0.0381 | 0.0668 |
| pos_1080 | TG(15:0/6:0/18:1)   | pos | C42 H78 O6 K1 | 1.2590 | 0.8768 | 0.0017 | 0.0094 |
| pos_1081 | TG(9:0/13:0/17:1)   | pos | C42 H78 O6 K1 | 1.0626 | 0.9243 | 0.0005 | 0.0064 |
| pos_1084 | TG(4:0/17:1/18:1)   | pos | C42 H76 O6 K1 | 1.4540 | 0.8286 | 0.0007 | 0.0065 |
| pos_1085 | TG(20:1/8:0/11:2)   | pos | C42 H75 O6    | 1.1790 | 0.8878 | 0.0008 | 0.0066 |
| pos_1086 | TG(6:0/13:0/20:4)   | pos | C42 H72 O6 K1 | 1.1174 | 0.9071 | 0.0030 | 0.0124 |
| pos_1087 | TG(18:1/10:1/11:3)  | pos | C42 H71 O6    | 0.8976 | 0.9115 | 0.0397 | 0.0689 |
| pos_1089 | TG(8:0/11:2/20:5)   | pos | C42 H67 O6    | 1.1148 | 0.8978 | 0.0009 | 0.0070 |
| pos_1092 | TG(16:1/10:0/14:0)  | pos | C43 H84 O6 N1 | 1.2613 | 0.8433 | 0.0332 | 0.0600 |
| pos_1096 | TG(18:1/11:1/11:1)  | pos | C43 H77 O6    | 1.2340 | 0.8783 | 0.0064 | 0.0188 |
| pos_1097 | TG(12:0e/6:0/22:4)  | pos | C43 H77 O5    | 1.1068 | 0.9097 | 0.0460 | 0.0769 |
| pos_1110 | TG(8:0/11:2/22:5)   | pos | C44 H71 O6    | 1.3755 | 0.8543 | 0.0002 | 0.0062 |
| pos_1111 | TG(8:0/11:2/22:6)   | pos | C44 H69 O6    | 1.8033 | 0.8059 | 0.0000 | 0.0029 |
| pos_1115 | TG(10:0/14:0/18:1)  | pos | C45 H84 O6 K1 | 2.0898 | 0.8351 | 0.0000 | 0.0045 |
| pos_1121 | TG(10:0/12:2/20:4)  | pos | C45 H75 O6    | 1.4798 | 0.8331 | 0.0003 | 0.0063 |
| pos_1123 | TG(12:1e/10:0/20:5) | pos | C45 H77 O5    | 1.1195 | 0.8830 | 0.0100 | 0.0250 |
| pos_1124 | TG(14:0e/6:0/22:6)  | pos | C45 H77 O5    | 1.2059 | 0.8824 | 0.0054 | 0.0169 |

# Supplementary Material

|          |                     |     |                |        |        |        |        |
|----------|---------------------|-----|----------------|--------|--------|--------|--------|
| pos_1127 | TG(12:1e/8:0/22:6)  | pos | C45 H75 O5     | 1.4395 | 0.8380 | 0.0008 | 0.0067 |
| pos_1128 | TG(10:0/10:2/22:6)  | pos | C45 H71 O6     | 0.9222 | 0.9295 | 0.0032 | 0.0129 |
| pos_1131 | TG(9:0/10:0/24:1)   | pos | C46 H86 O6 K1  | 1.0531 | 0.9186 | 0.0006 | 0.0064 |
| pos_1134 | TG(22:6/10:1/11:4)  | pos | C46 H67 O6     | 1.1411 | 0.8910 | 0.0015 | 0.0086 |
| pos_1152 | TG(16:0/14:0/14:3)  | pos | C47 H88 O6 N1  | 1.0760 | 0.8936 | 0.0201 | 0.0414 |
| pos_1153 | TG(16:1/14:0/14:3)  | pos | C47 H86 O6 N1  | 1.2590 | 0.8341 | 0.0180 | 0.0380 |
| pos_1156 | TG(16:1/14:0/14:4)  | pos | C53 H96 O6 N2  | 0.9542 | 0.9225 | 0.0125 | 0.0292 |
| pos_1157 | TG(16:0/10:4/18:2)  | pos | C53 H94 O6 N2  | 1.2907 | 0.8484 | 0.0160 | 0.0349 |
| pos_1158 | TG(12:1e/10:4/22:1) | pos | C47 H81 O5     | 1.3801 | 0.8398 | 0.0025 | 0.0109 |
| pos_1159 | TG(22:5/11:1/11:1)  | pos | C47 H77 O6     | 1.3064 | 0.8733 | 0.0002 | 0.0062 |
| pos_1161 | TG(22:6/11:1/11:1)  | pos | C47 H75 O6     | 1.2357 | 0.8867 | 0.0009 | 0.0068 |
| pos_1168 | TG(16:1/12:1/17:1)  | pos | C48 H90 O6 N1  | 1.1221 | 0.8890 | 0.0302 | 0.0557 |
| pos_1171 | TG(18:4/13:0/14:0)  | pos | C48 H88 O6 N1  | 1.9544 | 0.7941 | 0.0001 | 0.0060 |
| pos_1172 | TG(15:0/14:3/16:1)  | pos | C48 H88 O6 N1  | 1.1414 | 0.8865 | 0.0062 | 0.0185 |
| pos_1183 | TG(16:0/14:2/16:1)  | pos | C49 H92 O6 N1  | 0.9664 | 0.9037 | 0.0325 | 0.0590 |
| pos_1187 | TG(12:0/14:0/20:5)  | pos | C49 H84 O6 Na1 | 0.9697 | 0.9178 | 0.0132 | 0.0302 |
| pos_1189 | TG(16:1/10:0/20:5)  | pos | C49 H82 O6 Na1 | 1.1824 | 0.8759 | 0.0097 | 0.0246 |
| pos_1193 | TG(16:1/8:0/22:6)   | pos | C49 H84 O6 N1  | 1.5008 | 0.8177 | 0.0017 | 0.0094 |
| pos_1202 | TG(16:1/14:1/17:1)  | pos | C50 H94 O6 N1  | 1.9350 | 0.8376 | 0.0006 | 0.0064 |
| pos_1204 | TG(16:1/13:0/18:3)  | pos | C50 H92 O6 N1  | 1.2434 | 0.8620 | 0.0020 | 0.0099 |
| pos_1206 | TG(18:4/13:0/16:1)  | pos | C50 H90 O6 N1  | 1.0547 | 0.8729 | 0.0324 | 0.0590 |
| pos_1207 | TG(14:0/13:0/20:5)  | pos | C50 H90 O6 N1  | 1.2076 | 0.8935 | 0.0017 | 0.0095 |
| pos_1235 | TG(16:1/12:0/20:5)  | pos | C51 H86 O6 Na1 | 1.0233 | 0.9102 | 0.0137 | 0.0310 |



|          |                    |     |                |        |        |        |        |
|----------|--------------------|-----|----------------|--------|--------|--------|--------|
| pos_1236 | TG(12:0/14:0/22:6) | pos | C51 H86 O6 Na1 | 1.4403 | 0.8719 | 0.0002 | 0.0062 |
| pos_1239 | TG(16:1/10:0/22:6) | pos | C51 H88 O6 N1  | 1.4403 | 0.8073 | 0.0224 | 0.0450 |
| pos_1240 | TG(16:0/10:1/22:6) | pos | C51 H88 O6 N1  | 1.2130 | 0.8812 | 0.0411 | 0.0706 |
| pos_1242 | TG(14:0/14:3/20:5) | pos | C51 H86 O6 N1  | 1.5325 | 0.7913 | 0.0018 | 0.0097 |
| pos_1243 | TG(16:0/10:2/22:6) | pos | C51 H86 O6 N1  | 1.2654 | 0.8204 | 0.0145 | 0.0324 |
| pos_1244 | TG(18:4/14:3/16:1) | pos | C51 H83 O6     | 0.9697 | 0.9180 | 0.0132 | 0.0302 |
| pos_1245 | TG(15:0/11:2/22:6) | pos | C57 H98 O6 N2  | 1.0145 | 0.9131 | 0.0186 | 0.0390 |
| pos_1264 | TG(16:1/13:0/20:5) | pos | C52 H92 O6 N1  | 1.1301 | 0.8821 | 0.0464 | 0.0772 |
| pos_1276 | TG(18:1/10:3/22:6) | pos | C59 H98 O6 N2  | 1.1061 | 0.9165 | 0.0203 | 0.0416 |
| pos_1298 | TG(16:1/14:1/20:5) | pos | C53 H88 O6 Na1 | 1.1822 | 0.8789 | 0.0235 | 0.0465 |
| pos_1302 | TG(12:0/18:3/20:5) | pos | C53 H90 O6 N1  | 1.3541 | 0.8765 | 0.0055 | 0.0170 |
| pos_1303 | TG(16:0/14:3/20:5) | pos | C53 H90 O6 N1  | 1.4928 | 0.8130 | 0.0043 | 0.0150 |
| pos_1306 | TG(16:0/12:3/22:6) | pos | C59 H100 O6 N2 | 1.4376 | 0.7901 | 0.0052 | 0.0165 |
| pos_1330 | TG(20:5/14:2/17:1) | pos | C54 H92 O6 N1  | 1.0054 | 0.9023 | 0.0223 | 0.0449 |
| pos_1336 | TG(18:4/14:1/20:5) | pos | C55 H86 O6 Na1 | 1.4253 | 0.8550 | 0.0015 | 0.0086 |
| pos_1337 | TG(16:0/14:4/22:6) | pos | C55 H90 O6 N1  | 1.2317 | 0.8512 | 0.0362 | 0.0644 |
| pos_1340 | TG(16:0/18:1/18:1) | pos | C55 H106 O6 N1 | 2.1183 | 0.8735 | 0.0292 | 0.0544 |
| pos_1362 | TG(16:1/14:1/22:6) | pos | C55 H90 O6 Na1 | 0.9916 | 0.9082 | 0.0256 | 0.0494 |
| pos_1365 | TG(18:4/16:1/18:4) | pos | C55 H92 O6 N1  | 1.1895 | 0.8867 | 0.0229 | 0.0456 |
| pos_1371 | TG(20:5/13:0/20:5) | pos | C56 H88 O6 Na1 | 1.5498 | 0.8301 | 0.0186 | 0.0390 |
| pos_1374 | TG(20:4/11:2/22:6) | pos | C62 H100 O6 N2 | 1.0699 | 0.9257 | 0.0062 | 0.0184 |
| pos_1375 | TG(20:5/11:3/22:5) | pos | C62 H98 O6 N2  | 1.2557 | 0.8922 | 0.0055 | 0.0170 |
| pos_1388 | TG(14:0/17:1/22:5) | pos | C56 H100 O6 N1 | 1.0425 | 0.9074 | 0.0138 | 0.0310 |

# Supplementary Material

|          |                     |     |                |        |        |        |        |
|----------|---------------------|-----|----------------|--------|--------|--------|--------|
| pos_1392 | TG(16:1/17:1/20:5)  | pos | C56 H94 O6 Li1 | 1.6770 | 0.8475 | 0.0100 | 0.0250 |
| pos_1394 | TG(18:4/17:1/18:3)  | pos | C56 H96 O6 N1  | 1.0371 | 0.8839 | 0.0441 | 0.0743 |
| pos_1396 | TG(18:4/15:0/20:5)  | pos | C56 H90 O6 Na1 | 1.1917 | 0.8684 | 0.0118 | 0.0281 |
| pos_1398 | TG(11:0/20:4/22:5)  | pos | C62 H106 O6 N2 | 1.0985 | 0.9243 | 0.0017 | 0.0094 |
| pos_1405 | TG(12:0/20:5/22:6)  | pos | C57 H88 O6 Na1 | 1.3677 | 0.8694 | 0.0008 | 0.0067 |
| pos_1409 | TG(20:5/12:2/22:6)  | pos | C57 H85 O6     | 1.4253 | 0.8550 | 0.0015 | 0.0086 |
| pos_1417 | TG(16:0/16:0/22:4)  | pos | C57 H102 O6 K1 | 1.7416 | 0.7438 | 0.0055 | 0.0170 |
| pos_1426 | TG(16:0/16:0/22:6)  | pos | C57 H102 O6 N1 | 2.0784 | 0.8254 | 0.0051 | 0.0163 |
| pos_1433 | TG(16:1/16:1/22:5)  | pos | C57 H97 O6     | 0.9715 | 0.8930 | 0.0467 | 0.0777 |
| pos_1439 | TG(16:2e/16:1/22:6) | pos | C57 H98 O5 N1  | 1.4170 | 0.8350 | 0.0028 | 0.0118 |
| pos_1450 | TG(20:5/13:0/22:6)  | pos | C58 H90 O6 Li1 | 1.3312 | 0.8718 | 0.0023 | 0.0106 |
| pos_1471 | TG(18:3/17:1/20:5)  | pos | C58 H98 O6 N1  | 1.0148 | 0.9014 | 0.0126 | 0.0293 |
| pos_1483 | TG(18:3e/16:1/22:6) | pos | C59 H100 O5 N1 | 1.3034 | 0.8455 | 0.0066 | 0.0191 |
| pos_1487 | TG(20:5/14:1/22:6)  | pos | C59 H90 O6 Na1 | 1.3941 | 0.8580 | 0.0036 | 0.0136 |
| pos_1491 | TG(20:5/14:3/22:6)  | pos | C59 H90 O6 N1  | 1.5051 | 0.8090 | 0.0056 | 0.0171 |
| pos_1492 | TG(22:5/12:3/22:6)  | pos | C59 H87 O6     | 1.3677 | 0.8694 | 0.0008 | 0.0067 |
| pos_1505 | TG(16:1/18:1/22:3)  | pos | C59 H104 O6 K1 | 1.5270 | 0.7896 | 0.0125 | 0.0292 |
| pos_1522 | TG(20:5/18:2/18:2)  | pos | C59 H96 O6 Na1 | 1.0824 | 0.8860 | 0.0189 | 0.0393 |
| pos_1523 | TG(18:3/18:2/20:4)  | pos | C59 H100 O6 N1 | 1.1742 | 0.8942 | 0.0382 | 0.0669 |
| pos_1561 | TG(16:1/20:5/22:5)  | pos | C61 H100 O6 N1 | 1.2061 | 0.9036 | 0.0143 | 0.0319 |
| pos_1567 | TG(22:6/14:2/22:6)  | pos | C61 H94 O6 N1  | 1.2886 | 0.8802 | 0.0172 | 0.0367 |
| pos_1568 | TG(22:6/14:3/22:6)  | pos | C61 H92 O6 N1  | 1.6430 | 0.7986 | 0.0061 | 0.0183 |
| pos_1610 | TG(16:0/21:0/22:4)  | pos | C62 H116 O6 N1 | 1.4347 | 0.8958 | 0.0067 | 0.0194 |

|          |                     |     |                |        |        |        |        |
|----------|---------------------|-----|----------------|--------|--------|--------|--------|
| pos_1627 | TG(16:0/22:4/22:6)  | pos | C63 H103 O6    | 1.5492 | 0.8971 | 0.0001 | 0.0060 |
| pos_1637 | TG(18:3/20:4/22:6)  | pos | C63 H96 O6 Na1 | 1.4035 | 0.8359 | 0.0018 | 0.0096 |
| pos_1638 | TG(18:3/20:5/22:5)  | pos | C63 H96 O6 Na1 | 0.9444 | 0.9236 | 0.0024 | 0.0108 |
| pos_1640 | TG(18:3/20:5/22:6)  | pos | C63 H95 O6     | 1.4240 | 0.8341 | 0.0030 | 0.0122 |
| pos_1641 | TG(16:2e/22:6/22:6) | pos | C63 H100 O5 N1 | 1.3851 | 0.8510 | 0.0066 | 0.0190 |
| pos_1642 | TG(18:4/20:5/22:6)  | pos | C63 H92 O6 Na1 | 1.1464 | 0.9043 | 0.0086 | 0.0225 |
| pos_1643 | TG(20:5/20:5/20:5)  | pos | C63 H92 O6 Li1 | 1.3783 | 0.8395 | 0.0033 | 0.0129 |
| pos_1667 | TG(19:0/20:4/22:6)  | pos | C64 H108 O6 N1 | 1.1348 | 0.8917 | 0.0095 | 0.0243 |
| pos_1683 | TG(16:0/22:6/23:1)  | pos | C64 H114 O6 N1 | 0.8879 | 0.9311 | 0.0244 | 0.0477 |
| pos_1700 | TG(18:3/22:5/22:6)  | pos | C65 H102 O6 N1 | 1.0915 | 0.9177 | 0.0211 | 0.0428 |
| pos_1702 | TG(20:5/20:4/22:6)  | pos | C65 H97 O6     | 1.3035 | 0.8651 | 0.0078 | 0.0213 |
| pos_1704 | TG(18:3e/22:6/22:6) | pos | C65 H102 O5 N1 | 1.2097 | 0.8672 | 0.0101 | 0.0252 |
| pos_1705 | TG(20:5/20:5/22:6)  | pos | C65 H95 O6     | 1.2136 | 0.8615 | 0.0154 | 0.0338 |
| pos_1714 | TG(16:0/22:5/24:1)  | pos | C65 H115 O6    | 1.0901 | 0.9102 | 0.0020 | 0.0099 |
| pos_1716 | TG(18:1/22:1/22:5)  | pos | C65 H113 O6    | 1.1849 | 0.8860 | 0.0006 | 0.0064 |
| pos_1732 | TG(24:1/17:1/22:2)  | pos | C66 H124 O6 N1 | 1.0653 | 0.8941 | 0.0291 | 0.0543 |
| pos_1738 | TG(18:1/22:5/23:0)  | pos | C66 H120 O6 N1 | 1.1702 | 0.8863 | 0.0270 | 0.0517 |
| pos_1742 | TG(18:1/22:6/23:0)  | pos | C66 H118 O6 N1 | 1.1575 | 0.8957 | 0.0377 | 0.0663 |
| pos_1761 | TG(20:5/22:5/22:6)  | pos | C67 H99 O6     | 0.9718 | 0.9022 | 0.0238 | 0.0469 |
| pos_1773 | TG(18:1/22:5/24:1)  | pos | C67 H117 O6    | 1.1856 | 0.8830 | 0.0015 | 0.0086 |
| pos_1800 | TG(25:0/18:1/22:5)  | pos | C68 H124 O6 N1 | 1.0865 | 0.9004 | 0.0114 | 0.0275 |
| pos_1802 | TG(25:0/18:1/22:6)  | pos | C68 H122 O6 N1 | 0.9848 | 0.9217 | 0.0103 | 0.0255 |
| pos_1806 | TG(25:1/18:2/22:6)  | pos | C68 H118 O6 N1 | 1.5369 | 0.8784 | 0.0160 | 0.0349 |

# Supplementary Material

|          |                         |     |                 |        |        |        |        |
|----------|-------------------------|-----|-----------------|--------|--------|--------|--------|
| pos_1831 | TG(22:0/22:0/22:6)      | pos | C69 H126 O6 N1  | 0.9909 | 0.9234 | 0.0056 | 0.0172 |
| pos_1839 | TG(24:1/20:3/22:5)      | pos | C69 H120 O6 N1  | 1.1904 | 0.9011 | 0.0009 | 0.0070 |
| pos_1859 | TG(22:1/22:6/23:0)      | pos | C70 H126 O6 N1  | 1.0377 | 0.9175 | 0.0065 | 0.0189 |
| pos_1861 | TG(22:1/22:6/23:1)      | pos | C70 H124 O6 N1  | 1.0196 | 0.9211 | 0.0048 | 0.0158 |
| pos_1881 | TG(22:0/22:6/24:1)      | pos | C71 H124 O6 Na1 | 1.0846 | 0.8932 | 0.0100 | 0.0252 |
| pos_1882 | TG(24:1/22:1/22:6)      | pos | C71 H126 O6 N1  | 1.1086 | 0.8973 | 0.0077 | 0.0211 |
| pos_1883 | TG(24:1/22:4/22:4)      | pos | C71 H124 O6 N1  | 1.2926 | 0.8632 | 0.0003 | 0.0063 |
| pos_1884 | TG(24:1/22:2/22:6)      | pos | C71 H124 O6 N1  | 1.0295 | 0.9112 | 0.0272 | 0.0519 |
| pos_1892 | TG(24:1/22:6/23:0)      | pos | C72 H130 O6 N1  | 1.0839 | 0.9032 | 0.0061 | 0.0183 |
| pos_1897 | TG(26:0/22:6/22:6)      | pos | C73 H122 O6 N1  | 1.1590 | 0.8749 | 0.0064 | 0.0188 |
| pos_1906 | TG(24:0/22:6/24:1)      | pos | C73 H128 O6 Na1 | 1.0963 | 0.8928 | 0.0127 | 0.0294 |
| pos_1910 | TG(24:1/22:6/24:2)      | pos | C73 H128 O6 N1  | 1.2987 | 0.8669 | 0.0065 | 0.0189 |
| pos_1913 | TG(25:0/22:6/24:1)      | pos | C74 H134 O6 N1  | 1.5229 | 0.8729 | 0.0018 | 0.0097 |
| pos_1914 | TG(25:1/22:6/24:1)      | pos | C74 H132 O6 N1  | 1.2300 | 0.8576 | 0.0057 | 0.0174 |
| pos_1915 | TG(28:0/22:5/22:5)      | pos | C75 H130 O6 N1  | 1.3315 | 0.8569 | 0.0438 | 0.0742 |
| pos_1917 | TG(28:0/22:6/22:6)      | pos | C75 H126 O6 N1  | 1.0225 | 0.8972 | 0.0376 | 0.0662 |
| pos_1921 | TG(26:0/22:6/24:1)      | pos | C75 H136 O6 N1  | 0.9793 | 0.9057 | 0.0047 | 0.0156 |
| pos_1929 | WE(3:0/16:1)            | pos | H40 C19 O2 N1   | 1.7208 | 0.8868 | 0.0291 | 0.0543 |
| neg_1    | CL(14:0/16:0/16:0/18:0) | neg | C73 H140 O17 P2 | 1.7249 | 0.8317 | 0.0012 | 0.0092 |
| neg_2    | CL(16:0/16:0/16:0/16:0) | neg | C73 H140 O17 P2 | 1.9237 | 0.7796 | 0.0017 | 0.0111 |
| neg_3    | CL(14:0/16:0/16:1/18:1) | neg | C73 H136 O17 P2 | 1.7526 | 0.8382 | 0.0020 | 0.0118 |
| neg_4    | CL(16:0/16:0/18:0/18:0) | neg | C77 H148 O17 P2 | 2.0150 | 0.7716 | 0.0010 | 0.0083 |
| neg_5    | CL(16:0/16:0/16:0/20:0) | neg | C77 H148 O17 P2 | 1.2420 | 0.9194 | 0.0017 | 0.0109 |

|         |                         |     |                   |        |        |        |        |
|---------|-------------------------|-----|-------------------|--------|--------|--------|--------|
| neg_6   | CL(18:1/16:0/16:0/18:1) | neg | C77 H144 O17 P2   | 1.5235 | 0.8872 | 0.0009 | 0.0083 |
| neg_7   | CL(18:1/16:1/16:1/18:1) | neg | C77 H140 O17 P2   | 1.9679 | 0.7817 | 0.0008 | 0.0083 |
| neg_10  | CL(20:5/16:0/16:1/20:4) | neg | C81 H136 O17 P2   | 1.7086 | 0.8630 | 0.0010 | 0.0083 |
| neg_12  | CL(14:0/18:0/20:4/20:4) | neg | C81 H140 O17 P2   | 1.8582 | 0.8114 | 0.0016 | 0.0107 |
| neg_17  | CL(21:0/16:0/16:0/22:6) | neg | C84 H150 O17 P2   | 1.1224 | 0.9480 | 0.0026 | 0.0133 |
| neg_18  | CL(19:0/16:1/18:1/22:6) | neg | C84 H146 O17 P2   | 1.0346 | 0.9427 | 0.0099 | 0.0330 |
| neg_23  | CL(23:0/16:0/16:0/22:6) | neg | C86 H154 O17 P2   | 1.2090 | 0.9328 | 0.0010 | 0.0083 |
| neg_24  | CL(21:0/16:1/18:1/22:6) | neg | C86 H150 O17 P2   | 1.1993 | 0.9174 | 0.0043 | 0.0191 |
| neg_29  | CL(22:6/15:0/20:0/22:0) | neg | C88 H158 O17 P2   | 1.0363 | 0.9440 | 0.0009 | 0.0083 |
| neg_31  | CL(23:0/16:0/18:0/22:6) | neg | C88 H159 O17 P2   | 1.0948 | 0.9400 | 0.0002 | 0.0050 |
| neg_34  | CL(21:0/16:0/22:5/22:6) | neg | C90 H153 O17 P2   | 1.2719 | 0.9074 | 0.0012 | 0.0092 |
| neg_38  | CL(17:0/22:5/22:6/22:6) | neg | C92 H145 O17 P2   | 1.6344 | 0.8433 | 0.0034 | 0.0161 |
| neg_78  | GD2(d19:0/22:6)         | neg | C83 H136 O34 N4   | 1.5599 | 0.8581 | 0.0003 | 0.0063 |
| neg_91  | Hex1Cer(t18:0/22:6)     | neg | C47 H80 O11 N1    | 0.9345 | 0.9584 | 0.0013 | 0.0092 |
| neg_92  | Hex2Cer(d12:0/16:0)     | neg | C40 H76 O13 N1    | 1.2012 | 0.9078 | 0.0445 | 0.0977 |
| neg_104 | LPE(20:3)               | neg | C25 H45 O7 N1 P1  | 1.4828 | 0.8542 | 0.0076 | 0.0276 |
| neg_105 | LPE(20:5)               | neg | C25 H41 O7 N1 P1  | 1.6004 | 0.8872 | 0.0000 | 0.0012 |
| neg_107 | LPET(18:1)              | neg | C23 H44 O7 N0 P1  | 1.3940 | 0.8551 | 0.0160 | 0.0461 |
| neg_109 | LPET(22:6)              | neg | C27 H42 O7 N0 P1  | 1.4132 | 0.8499 | 0.0154 | 0.0455 |
| neg_113 | LPG(20:4)               | neg | C26 H44 O9 N0 P1  | 0.9400 | 0.9315 | 0.0204 | 0.0553 |
| neg_114 | LPG(20:5)               | neg | C26 H42 O9 N0 P1  | 1.2358 | 0.8951 | 0.0029 | 0.0142 |
| neg_115 | LPG(22:6)               | neg | C28 H44 O9 N0 P1  | 1.0608 | 0.9230 | 0.0211 | 0.0567 |
| neg_116 | LPI(16:0)               | neg | C25 H48 O12 N0 P1 | 1.4773 | 0.8663 | 0.0096 | 0.0323 |

# Supplementary Material

|         |                      |     |                   |        |        |        |        |
|---------|----------------------|-----|-------------------|--------|--------|--------|--------|
| neg_118 | LPI(18:1)            | neg | C27 H50 O12 N0 P1 | 1.7265 | 0.8287 | 0.0026 | 0.0133 |
| neg_119 | LPI(20:1)            | neg | C29 H54 O12 N0 P1 | 3.4673 | 0.1883 | 0.0006 | 0.0072 |
| neg_122 | LPI(20:4)            | neg | C29 H48 O12 N0 P1 | 1.3948 | 0.8926 | 0.0020 | 0.0115 |
| neg_123 | LPI(20:5)            | neg | C29 H46 O12 N0 P1 | 1.5652 | 0.8509 | 0.0012 | 0.0092 |
| neg_124 | LPI(22:5)            | neg | C31 H50 O12 N0 P1 | 1.7518 | 0.8282 | 0.0029 | 0.0141 |
| neg_125 | LPI(22:6)            | neg | C31 H48 O12 N0 P1 | 1.5606 | 0.8765 | 0.0023 | 0.0125 |
| neg_141 | LdMePE(18:2)         | neg | C25 H47 O7 N1 P1  | 1.0538 | 0.9320 | 0.0061 | 0.0240 |
| neg_142 | LdMePE(18:3)         | neg | C25 H45 O7 N1 P1  | 1.7015 | 0.8490 | 0.0004 | 0.0066 |
| neg_150 | LdMePE(20:4)         | neg | C27 H47 O7 N1 P1  | 1.1778 | 0.9261 | 0.0047 | 0.0203 |
| neg_151 | LdMePE(20:5)         | neg | C27 H45 O7 N1 P1  | 1.5167 | 0.8954 | 0.0001 | 0.0043 |
| neg_153 | LdMePE(22:5)         | neg | C29 H49 O7 N1 P1  | 1.1727 | 0.9246 | 0.0082 | 0.0290 |
| neg_154 | LdMePE(22:6)         | neg | C29 H47 O7 N1 P1  | 1.3260 | 0.9216 | 0.0005 | 0.0072 |
| neg_196 | MLCL(14:2/20:4/20:4) | neg | C63 H102 O16 P2   | 1.4708 | 0.9171 | 0.0001 | 0.0033 |
| neg_203 | MLCL(14:2/22:6/22:6) | neg | C67 H102 O16 P2   | 1.2764 | 0.9315 | 0.0008 | 0.0083 |
| neg_206 | MLCL(18:4/20:4/22:6) | neg | C69 H106 O16 P2   | 1.4379 | 0.8632 | 0.0113 | 0.0363 |
| neg_255 | PC(22:4/22:5)        | neg | C53 H87 O10 N1 P1 | 1.3948 | 0.8635 | 0.0408 | 0.0934 |
| neg_293 | PE(14:0/20:4)        | neg | C39 H69 O8 N1 P1  | 1.2648 | 0.9200 | 0.0000 | 0.0030 |
| neg_309 | PE(16:1/20:4)        | neg | C41 H71 O8 N1 P1  | 1.2838 | 0.9152 | 0.0001 | 0.0044 |
| neg_310 | PE(14:0/22:6)        | neg | C41 H69 O8 N1 P1  | 1.4904 | 0.8949 | 0.0000 | 0.0015 |
| neg_321 | PE(15:0/22:6)        | neg | C42 H71 O8 N1 P1  | 1.2415 | 0.9172 | 0.0019 | 0.0113 |
| neg_339 | PE(16:2e/22:6)       | neg | C43 H71 O7 N1 P1  | 1.1208 | 0.9339 | 0.0052 | 0.0215 |
| neg_344 | PE(17:1/22:6)        | neg | C44 H73 O8 N1 P1  | 1.4502 | 0.8849 | 0.0022 | 0.0122 |
| neg_345 | PE(18:4/22:6)        | neg | C45 H69 O8 N1 P1  | 1.6655 | 0.8475 | 0.0002 | 0.0050 |

|         |                |     |                   |        |        |        |        |
|---------|----------------|-----|-------------------|--------|--------|--------|--------|
| neg_352 | PE(18:1/22:5)  | neg | C45 H77 O8 N1 P1  | 1.1445 | 0.9139 | 0.0128 | 0.0398 |
| neg_356 | PE(20:4/20:4)  | neg | C45 H73 O8 N1 P1  | 1.4082 | 0.9078 | 0.0000 | 0.0016 |
| neg_360 | PE(19:1/22:6)  | neg | C46 H77 O8 N1 P1  | 1.2497 | 0.9147 | 0.0004 | 0.0067 |
| neg_364 | PE(20:1/22:6)  | neg | C47 H79 O8 N1 P1  | 1.2097 | 0.9336 | 0.0000 | 0.0015 |
| neg_368 | PE(22:5/20:4)  | neg | C47 H75 O8 N1 P1  | 1.3108 | 0.8982 | 0.0247 | 0.0633 |
| neg_372 | PEt(18:0/18:1) | neg | C41 H78 O8 N0 P1  | 1.4077 | 0.8477 | 0.0187 | 0.0513 |
| neg_373 | PEt(18:1/18:1) | neg | C41 H76 O8 N0 P1  | 1.4216 | 0.8438 | 0.0177 | 0.0495 |
| neg_375 | PEt(16:0/20:5) | neg | C41 H70 O8 N0 P1  | 1.4159 | 0.8415 | 0.0151 | 0.0451 |
| neg_378 | PEt(16:1/22:6) | neg | C43 H70 O8 N0 P1  | 2.9070 | 0.2174 | 0.0126 | 0.0396 |
| neg_380 | PEt(18:1/22:6) | neg | C45 H74 O8 N0 P1  | 1.1751 | 0.8762 | 0.0362 | 0.0847 |
| neg_404 | PG(16:2e/20:4) | neg | C42 H72 O9 N0 P1  | 1.8699 | 0.7981 | 0.0006 | 0.0072 |
| neg_418 | PG(20:5/22:6)  | neg | C48 H72 O10 N0 P1 | 1.2305 | 0.8761 | 0.0269 | 0.0675 |
| neg_420 | PG(22:5/22:6)  | neg | C50 H76 O10 N0 P1 | 0.9939 | 0.9346 | 0.0176 | 0.0495 |
| neg_421 | PG(22:6/22:6)  | neg | C50 H74 O10 N0 P1 | 0.9856 | 0.9354 | 0.0159 | 0.0460 |
| neg_424 | PI(16:0/18:1)  | neg | C43 H80 O13 N0 P1 | 1.3564 | 0.8953 | 0.0105 | 0.0344 |
| neg_427 | PI(18:0/18:1)  | neg | C45 H84 O13 N0 P1 | 1.4345 | 0.8859 | 0.0061 | 0.0240 |
| neg_429 | PI(16:0/20:4)  | neg | C45 H78 O13 N0 P1 | 0.9971 | 0.9481 | 0.0008 | 0.0083 |
| neg_430 | PI(16:1/20:4)  | neg | C45 H76 O13 N0 P1 | 1.2761 | 0.9007 | 0.0009 | 0.0083 |
| neg_433 | PI(16:1/20:5)  | neg | C45 H74 O13 N0 P1 | 1.4335 | 0.8568 | 0.0023 | 0.0125 |
| neg_434 | PI(14:0/22:6)  | neg | C45 H74 O13 N0 P1 | 1.3905 | 0.8431 | 0.0134 | 0.0408 |
| neg_440 | PI(16:1/22:5)  | neg | C47 H78 O13 N0 P1 | 1.5651 | 0.8451 | 0.0043 | 0.0191 |
| neg_442 | PI(16:0e/22:6) | neg | C47 H80 O12 N0 P1 | 1.2105 | 0.9128 | 0.0058 | 0.0235 |
| neg_443 | PI(19:0/20:4)  | neg | C48 H84 O13 N0 P1 | 1.3491 | 0.9148 | 0.0003 | 0.0063 |

# Supplementary Material

|         |                  |     |                   |        |        |        |        |
|---------|------------------|-----|-------------------|--------|--------|--------|--------|
| neg_444 | PI(17:0/22:6)    | neg | C48 H80 O13 N0 P1 | 1.1377 | 0.9303 | 0.0017 | 0.0111 |
| neg_445 | PI(17:1/22:6)    | neg | C48 H78 O13 N0 P1 | 1.1482 | 0.8978 | 0.0158 | 0.0458 |
| neg_447 | PI(18:0/22:5)    | neg | C49 H84 O13 N0 P1 | 1.0393 | 0.9425 | 0.0142 | 0.0431 |
| neg_450 | PI(18:3/22:6)    | neg | C49 H76 O13 N0 P1 | 1.2270 | 0.8699 | 0.0127 | 0.0398 |
| neg_451 | PI(19:0/22:6)    | neg | C50 H84 O13 N0 P1 | 0.9399 | 0.9406 | 0.0157 | 0.0458 |
| neg_452 | PI(20:5/22:6)    | neg | C51 H76 O13 N0 P1 | 3.0587 | 0.3151 | 0.0044 | 0.0194 |
| neg_453 | PI(22:5/20:4)    | neg | C51 H80 O13 N0 P1 | 1.1121 | 0.8857 | 0.0294 | 0.0724 |
| neg_454 | PI(22:4/22:6)    | neg | C53 H82 O13 N0 P1 | 2.2126 | 0.0463 | 0.0495 | 0.1051 |
| neg_457 | PIP2(20:4e/19:0) | neg | C48 H88 O18 N0 P3 | 1.3480 | 0.8950 | 0.0063 | 0.0242 |
| neg_467 | PS(14:0/22:6)    | neg | C42 H69 O10 N1 P1 | 1.0088 | 0.9107 | 0.0310 | 0.0750 |
| neg_484 | PS(18:3/20:5)    | neg | C44 H69 O10 N1 P1 | 2.7791 | 0.2109 | 0.0123 | 0.0390 |
| neg_486 | PS(19:0/20:4)    | neg | C45 H79 O10 N1 P1 | 1.2656 | 0.9125 | 0.0066 | 0.0251 |
| neg_487 | PS(19:0/20:5)    | neg | C45 H77 O10 N1 P1 | 1.1893 | 0.9214 | 0.0082 | 0.0290 |
| neg_492 | PS(20:0/20:5)    | neg | C46 H79 O10 N1 P1 | 1.1156 | 0.9174 | 0.0299 | 0.0734 |
| neg_501 | PS(18:3/22:6)    | neg | C46 H71 O10 N1 P1 | 1.4103 | 0.8659 | 0.0130 | 0.0402 |
| neg_502 | PS(18:3e/22:6)   | neg | C46 H73 O9 N1 P1  | 1.2607 | 0.9035 | 0.0016 | 0.0107 |
| neg_506 | PS(19:0/22:6)    | neg | C47 H79 O10 N1 P1 | 1.0060 | 0.9461 | 0.0082 | 0.0290 |
| neg_507 | PS(20:4/22:6)    | neg | C48 H73 O10 N1 P1 | 0.9317 | 0.9355 | 0.0457 | 0.0995 |
| neg_509 | PS(20:5/22:6)    | neg | C48 H71 O10 N1 P1 | 1.3128 | 0.8755 | 0.0092 | 0.0315 |
| neg_513 | PS(20:1/22:6)    | neg | C48 H79 O10 N1 P1 | 1.1030 | 0.9359 | 0.0014 | 0.0097 |
| neg_517 | PS(20:2/22:6)    | neg | C48 H77 O10 N1 P1 | 1.0789 | 0.9405 | 0.0010 | 0.0083 |
| neg_520 | PS(20:5/22:4)    | neg | C48 H75 O10 N1 P1 | 1.5228 | 0.8612 | 0.0092 | 0.0315 |
| neg_538 | SM(d20:0/24:1)   | neg | C50 H100 O8 N2 P1 | 1.4104 | 0.8660 | 0.0261 | 0.0658 |



|         |                  |     |                      |        |        |        |        |
|---------|------------------|-----|----------------------|--------|--------|--------|--------|
| neg_592 | dMePE(20:5/20:5) | neg | C47 H73 O8 N1 P1     | 1.6279 | 0.8338 | 0.0010 | 0.0083 |
| neg_597 | dMePE(18:2/22:6) | neg | C47 H77 O8 N1 P1     | 1.0886 | 0.9059 | 0.0352 | 0.0834 |
| neg_598 | dMePE(20:5/20:4) | neg | C47 H75 O8 N1 P1     | 1.4016 | 0.8896 | 0.0006 | 0.0072 |
| neg_599 | dMePE(20:5/22:5) | neg | C49 H77 O8 N1 P1     | 2.3461 | 0.5277 | 0.0217 | 0.0576 |
| neg_600 | dMePE(20:4/22:6) | neg | C49 H77 O8 N1 P1     | 1.2706 | 0.9116 | 0.0005 | 0.0071 |
| neg_601 | dMePE(20:5/22:6) | neg | C49 H75 O8 N1 P1     | 1.5555 | 0.8744 | 0.0003 | 0.0062 |
| neg_603 | dMePE(22:6/22:6) | neg | C51 H77 O8 N1 P1     | 2.0327 | 0.8135 | 0.0000 | 0.0010 |
| neg_608 | phSM(t18:1/18:0) | neg | C41 H83 O8 N2 P1 Cl1 | 1.2259 | 0.8958 | 0.0165 | 0.470  |

**1.5 Table S5. Higher abundant levels of lipid species in vacuum-packaged (VP) pike eels in comparison with fresh (FE) pike eels via LC-MS/MS analysis.**

| ID      | Lipids              | Mode | Formula              | VIP    | FC     | <i>P</i> value | FDR    |
|---------|---------------------|------|----------------------|--------|--------|----------------|--------|
| pos_8   | BisMePA(12:0e/22:6) | pos  | C39 H67 O7 N0 P1 Na1 | 1.2249 | 1.0347 | 0.0026         | 0.0850 |
| pos_37  | Cer(d17:1/16:0)     | pos  | C33 H64 O2 N1        | 1.3929 | 1.0609 | 0.0495         | 0.2974 |
| pos_41  | Cer(d18:1/16:0)     | pos  | C34 H68 O3 N1        | 1.1422 | 1.0292 | 0.0038         | 0.0968 |
| pos_79  | Cer(t17:0/16:0)     | pos  | C33 H64 O2 N1        | 1.6452 | 1.0825 | 0.0343         | 0.2501 |
| pos_90  | Cer(t16:0/23:5)     | pos  | C39 H68 O3 N1        | 1.5132 | 1.0525 | 0.0028         | 0.0886 |
| pos_120 | Co(Q8)              | pos  | C49 H75 O4           | 4.1390 | 1.3775 | 0.0000         | 0.0005 |
| pos_121 | Co(Q9)              | pos  | C54 H83 O4           | 3.5927 | 1.2947 | 0.0001         | 0.0094 |
| pos_122 | DG(16:1/12:0)       | pos  | C31 H58 O5 Na1       | 1.4001 | 1.0455 | 0.0103         | 0.1578 |
| pos_124 | DG(16:1/14:0)       | pos  | C33 H66 O5 N1        | 0.9137 | 1.0199 | 0.0246         | 0.2195 |
| pos_130 | DG(16:0/16:0)       | pos  | C35 H72 O5 N1        | 1.0945 | 1.0289 | 0.0258         | 0.2256 |
| pos_144 | DG(18:4/15:0)       | pos  | C36 H66 O5 N1        | 1.1905 | 1.0401 | 0.0413         | 0.2767 |
| pos_151 | DG(16:0/18:3)       | pos  | C37 H67 O5           | 1.3659 | 1.0462 | 0.0268         | 0.2258 |
| pos_153 | DG(18:4/16:0)       | pos  | C37 H65 O5           | 1.1334 | 1.0304 | 0.0210         | 0.2036 |
| pos_156 | DG(14:0/20:5)       | pos  | C37 H63 O5           | 1.2578 | 1.0324 | 0.0053         | 0.1094 |
| pos_180 | DG(16:0/20:5)       | pos  | C39 H70 O5 N1        | 1.2485 | 1.0297 | 0.0073         | 0.1347 |
| pos_184 | DG(16:1/20:5)       | pos  | C39 H68 O5 N1        | 1.2765 | 1.0357 | 0.0193         | 0.1993 |
| pos_197 | DG(17:1/20:4)       | pos  | C40 H72 O5 N1        | 1.2910 | 1.0359 | 0.0061         | 0.1197 |
| pos_198 | DG(15:0/22:5)       | pos  | C40 H69 O5           | 1.2340 | 1.0325 | 0.0050         | 0.1094 |
| pos_200 | DG(17:1/20:5)       | pos  | C40 H70 O5 N1        | 1.1882 | 1.0290 | 0.0034         | 0.0931 |
| pos_201 | DG(15:0/22:6)       | pos  | C40 H70 O5 N1        | 1.9174 | 1.1040 | 0.0374         | 0.2648 |

---

|         |                     |     |                      |        |        |        |        |
|---------|---------------------|-----|----------------------|--------|--------|--------|--------|
| pos_207 | DG(16:0/22:4)       | pos | C41 H76 O5 N1        | 1.0576 | 1.0248 | 0.0161 | 0.1916 |
| pos_214 | DG(16:1/22:5)       | pos | C41 H69 O5           | 0.9615 | 1.0222 | 0.0341 | 0.2501 |
| pos_225 | DG(17:0/22:5)       | pos | C42 H76 O5 N1        | 1.6344 | 1.0492 | 0.0004 | 0.0258 |
| pos_235 | DG(18:0/22:4)       | pos | C43 H80 O5 N1        | 1.0524 | 1.0273 | 0.0223 | 0.2099 |
| pos_236 | DG(20:0/20:4)       | pos | C43 H80 O5 N1        | 1.0051 | 1.0304 | 0.0500 | 0.2993 |
| pos_242 | DG(20:3/20:4)       | pos | C43 H70 O5 Na1       | 1.1123 | 1.0288 | 0.0199 | 0.1993 |
| pos_272 | DG(22:5/22:5)       | pos | C47 H73 O5           | 0.8831 | 1.0214 | 0.0465 | 0.2905 |
| pos_274 | DG(22:5/22:6)       | pos | C47 H71 O5           | 1.0180 | 1.0218 | 0.0128 | 0.1765 |
| pos_284 | DG(22:4/22:5)       | pos | C47 H78 O5 N1        | 0.9641 | 1.0222 | 0.0225 | 0.2099 |
| pos_285 | DG(22:6/23:1)       | pos | C48 H84 O5 N1        | 1.0586 | 1.0319 | 0.0371 | 0.2648 |
| pos_320 | Hex2Cer(d16:1/26:1) | pos | C54 H102 O13 N1      | 2.4754 | 1.1664 | 0.0049 | 0.1093 |
| pos_378 | LPE(16:1)           | pos | C21 H42 O7 N1 P1 Na1 | 3.5775 | 1.2897 | 0.0000 | 0.0001 |
| pos_379 | LPE(16:1e)          | pos | C21 H44 O6 N1 P1 Na1 | 1.3907 | 1.0376 | 0.0108 | 0.1580 |
| pos_387 | LPG(18:1)           | pos | C24 H47 O9 N0 P1 Na1 | 3.0188 | 1.4114 | 0.0341 | 0.2501 |
| pos_404 | MePC(8:0/22:5)      | pos | C39 H68 O8 N1 P1 Na1 | 3.9241 | 1.3656 | 0.0000 | 0.0000 |
| pos_435 | MePC(22:6/12:3)     | pos | C43 H68 O8 N1 P1 Na1 | 3.0620 | 1.2234 | 0.0000 | 0.0009 |
| pos_502 | PC(11:0/16:1)       | pos | C35 H69 O8 N1 P1     | 3.0466 | 1.2352 | 0.0002 | 0.0152 |
| pos_503 | PC(9:0/18:2)        | pos | C35 H67 O8 N1 P1     | 1.7938 | 1.0951 | 0.0280 | 0.2301 |
| pos_511 | PC(11:0/18:2)       | pos | C37 H71 O8 N1 P1     | 4.5489 | 1.4542 | 0.0000 | 0.0000 |
| pos_519 | PC(16:1/14:1)       | pos | C38 H73 O8 N1 P1     | 3.2323 | 1.2424 | 0.0001 | 0.0116 |
| pos_524 | PC(17:0/14:0)       | pos | C39 H79 O8 N1 P1     | 1.4182 | 1.0483 | 0.0028 | 0.0886 |
| pos_530 | PC(17:1/14:1)       | pos | C39 H75 O8 N1 P1     | 3.0716 | 1.1645 | 0.0000 | 0.0004 |
| pos_563 | PC(11:0/22:5)       | pos | C41 H73 O8 N1 P1     | 1.4253 | 1.0525 | 0.0480 | 0.2928 |

---

## Supplementary Material

|         |                |     |                       |        |        |        |        |
|---------|----------------|-----|-----------------------|--------|--------|--------|--------|
| pos_565 | PC(11:0/22:6)  | pos | C41 H71 O8 N1 P1      | 2.2490 | 1.0998 | 0.0003 | 0.0249 |
| pos_614 | PC(18:1/18:2)  | pos | C44 H83 O8 N1 P1      | 3.3151 | 1.5391 | 0.0304 | 0.2391 |
| pos_666 | PC(18:1/20:4)  | pos | C46 H83 O8 N1 P1      | 2.1186 | 1.1331 | 0.0075 | 0.1368 |
| pos_778 | PE(16:1/14:1)  | pos | C35 H67 O8 N1 P1      | 2.0650 | 1.1311 | 0.0288 | 0.2319 |
| pos_779 | PE(16:0/16:1)  | pos | C37 H73 O8 N1 P1      | 4.5421 | 1.4653 | 0.0000 | 0.0004 |
| pos_781 | PE(16:1/16:1)  | pos | C37 H70 O8 N1 P1 Na1  | 3.4960 | 1.3013 | 0.0001 | 0.0127 |
| pos_783 | PE(17:1/16:1)  | pos | C38 H73 O8 N1 P1      | 3.7100 | 1.3068 | 0.0000 | 0.0001 |
| pos_787 | PE(16:1/18:1)  | pos | C39 H75 O8 N1 P1      | 3.0716 | 1.1645 | 0.0000 | 0.0004 |
| pos_790 | PE(16:1/18:2)  | pos | C39 H72 O8 N1 P1 Na1  | 2.2394 | 1.0989 | 0.0003 | 0.0255 |
| pos_808 | PE(16:1/20:5)  | pos | C41 H71 O8 N1 P1      | 2.3976 | 1.1096 | 0.0000 | 0.0071 |
| pos_849 | PEt(15:0/14:0) | pos | C34 H68 O8 N0 P1      | 1.0901 | 1.0217 | 0.0032 | 0.0912 |
| pos_850 | PEt(15:0/14:1) | pos | C34 H66 O8 N0 P1      | 1.0448 | 1.0265 | 0.0493 | 0.2974 |
| pos_854 | PEt(17:1/15:0) | pos | C37 H72 O8 N0 P1      | 1.0747 | 1.0220 | 0.0053 | 0.1094 |
| pos_855 | PEt(18:0/15:0) | pos | C38 H76 O8 N0 P1      | 0.9126 | 1.0169 | 0.0129 | 0.1765 |
| pos_869 | PEt(15:0/22:6) | pos | C42 H72 O8 N0 P1      | 1.2352 | 1.0284 | 0.0053 | 0.1094 |
| pos_872 | PG(16:1/14:0)  | pos | C36 H70 O10 N0 P1     | 1.8713 | 1.1264 | 0.0047 | 0.1064 |
| pos_873 | PG(16:1/16:1)  | pos | C38 H71 O10 N0 P1 Na1 | 3.2965 | 1.2678 | 0.0001 | 0.0127 |
| pos_875 | PG(16:0/18:2)  | pos | C40 H75 O10 N0 P1 Na1 | 2.5756 | 1.1567 | 0.0032 | 0.0912 |
| pos_878 | PG(30:0/16:0)  | pos | C52 H107 O10 N1 P1    | 2.0453 | 1.1090 | 0.0293 | 0.2345 |
| pos_882 | PI(16:1/22:6)  | pos | C47 H81 O13 N1 P1     | 2.4553 | 1.1814 | 0.0080 | 0.1380 |
| pos_886 | PI(22:6/22:6)  | pos | C53 H83 O13 N1 P1     | 2.2671 | 1.1912 | 0.0263 | 0.2258 |
| pos_889 | PMe(16:0/14:0) | pos | C34 H68 O8 N0 P1      | 1.0901 | 1.0217 | 0.0032 | 0.0912 |
| pos_890 | PMe(16:0/14:1) | pos | C34 H66 O8 N0 P1      | 1.0572 | 1.0268 | 0.0455 | 0.2889 |

|          |                     |     |                  |        |        |        |        |
|----------|---------------------|-----|------------------|--------|--------|--------|--------|
| pos_893  | PMe(16:0/17:0)      | pos | C37 H74 O8 N0 P1 | 1.0629 | 1.0226 | 0.0029 | 0.0912 |
| pos_894  | PMe(17:1/16:0)      | pos | C37 H72 O8 N0 P1 | 1.0555 | 1.0215 | 0.0065 | 0.1256 |
| pos_909  | PMe(16:0/22:6)      | pos | C42 H72 O8 N0 P1 | 1.2352 | 1.0284 | 0.0053 | 0.1094 |
| pos_1025 | SPH(t20:0)          | pos | C20 H44 O3 N1    | 1.5321 | 1.0654 | 0.0106 | 0.1580 |
| pos_1036 | TG(8:0/10:2/14:0)   | pos | C35 H63 O6       | 1.0971 | 1.0347 | 0.0375 | 0.2648 |
| pos_1045 | TG(16:0/8:0/11:3)   | pos | C38 H67 O6       | 1.6418 | 1.0959 | 0.0240 | 0.2168 |
| pos_1067 | TG(14:0/10:2/14:0)  | pos | C41 H74 O6 Li1   | 2.0195 | 1.1270 | 0.0061 | 0.1197 |
| pos_1072 | TG(12:1e/10:4/16:0) | pos | C41 H74 O5 N1    | 0.9772 | 1.0179 | 0.0089 | 0.1397 |
| pos_1083 | TG(18:3/10:3/11:4)  | pos | C42 H60 O6 Li1   | 1.6387 | 1.1222 | 0.0425 | 0.2799 |
| pos_1084 | TG(4:0/17:1/18:1)   | pos | C42 H76 O6 K1    | 1.5172 | 1.0439 | 0.0001 | 0.0127 |
| pos_1100 | TG(12:0e/6:0/22:6)  | pos | C43 H73 O5       | 2.3239 | 1.1208 | 0.0034 | 0.0931 |
| pos_1102 | TG(18:4/10:2/12:2)  | pos | C43 H67 O6       | 1.5010 | 1.0607 | 0.0265 | 0.2258 |
| pos_1106 | TG(20:4/10:4/11:3)  | pos | C44 H62 O6 Li1   | 1.8713 | 1.1264 | 0.0047 | 0.1064 |
| pos_1112 | TG(17:1/10:4/14:4)  | pos | C44 H67 O6       | 1.6304 | 1.1014 | 0.0488 | 0.2970 |
| pos_1115 | TG(10:0/14:0/18:1)  | pos | C45 H84 O6 K1    | 1.1827 | 1.0363 | 0.0287 | 0.2319 |
| pos_1124 | TG(14:0e/6:0/22:6)  | pos | C45 H77 O5       | 1.2469 | 1.0387 | 0.0197 | 0.1993 |
| pos_1126 | TG(10:0/12:2/20:5)  | pos | C45 H73 O6       | 1.2973 | 1.0420 | 0.0166 | 0.1916 |
| pos_1128 | TG(10:0/10:2/22:6)  | pos | C45 H71 O6       | 0.9741 | 1.0226 | 0.0183 | 0.1992 |
| pos_1134 | TG(22:6/10:1/11:4)  | pos | C46 H67 O6       | 1.1683 | 1.0376 | 0.0405 | 0.2767 |
| pos_1144 | TG(18:2/11:2/14:4)  | pos | C46 H73 O6       | 1.7118 | 1.0629 | 0.0010 | 0.0565 |
| pos_1162 | TG(12:0e/10:2/22:6) | pos | C47 H77 O5       | 1.4283 | 1.0496 | 0.0089 | 0.1397 |
| pos_1320 | TG(15:0/14:0/22:5)  | pos | C54 H95 O6       | 1.7183 | 1.0823 | 0.0195 | 0.1993 |
| pos_1459 | TG(16:0/17:0/22:5)  | pos | C58 H106 O6 N1   | 1.0592 | 1.0261 | 0.0243 | 0.2185 |

# Supplementary Material

|          |                         |     |                 |        |        |        |        |
|----------|-------------------------|-----|-----------------|--------|--------|--------|--------|
| pos_1482 | TG(14:0/20:4/22:6)      | pos | C59 H95 O6      | 1.8718 | 1.0956 | 0.0233 | 0.2139 |
| pos_1519 | TG(16:1/20:4/20:4)      | pos | C59 H97 O6      | 1.4921 | 1.0564 | 0.0082 | 0.1384 |
| pos_1529 | TG(15:0/20:4/22:6)      | pos | C60 H96 O6 Na1  | 1.7790 | 1.0753 | 0.0194 | 0.1993 |
| pos_1563 | TG(14:0/22:6/22:6)      | pos | C61 H95 O6      | 1.5502 | 1.0877 | 0.0183 | 0.1992 |
| pos_1591 | TG(16:1/20:4/22:4)      | pos | C61 H101 O6     | 2.0916 | 1.1315 | 0.0193 | 0.1993 |
| pos_1625 | TG(18:1/20:3/22:6)      | pos | C63 H103 O6     | 2.1188 | 1.1301 | 0.0109 | 0.1580 |
| pos_1836 | TG(24:1/20:2/22:5)      | pos | C69 H122 O6 N1  | 2.0386 | 1.0885 | 0.0168 | 0.1929 |
| pos_1936 | ZyE(20:5)               | pos | C47 H73 O2      | 2.0333 | 1.1275 | 0.0056 | 0.1123 |
| pos_1939 | ZyE(22:6)               | pos | C49 H75 O2      | 1.9877 | 1.1135 | 0.0066 | 0.1256 |
| neg_2    | CL(16:0/16:0/16:0/16:0) | neg | C73 H140 O17 P2 | 1.5816 | 1.1048 | 0.0010 | 0.0148 |
| neg_3    | CL(14:0/16:0/16:1/18:1) | neg | C73 H136 O17 P2 | 1.0938 | 1.0463 | 0.0040 | 0.0325 |
| neg_4    | CL(16:0/16:0/18:0/18:0) | neg | C77 H148 O17 P2 | 1.0954 | 1.0525 | 0.0110 | 0.0631 |
| neg_5    | CL(16:0/16:0/16:0/20:0) | neg | C77 H148 O17 P2 | 0.9840 | 1.0360 | 0.0020 | 0.0217 |
| neg_7    | CL(18:1/16:1/16:1/18:1) | neg | C77 H140 O17 P2 | 1.1358 | 1.0606 | 0.0161 | 0.0781 |
| neg_10   | CL(20:5/16:0/16:1/20:4) | neg | C81 H136 O17 P2 | 1.0323 | 1.0409 | 0.0135 | 0.0711 |
| neg_12   | CL(14:0/18:0/20:4/20:4) | neg | C81 H140 O17 P2 | 1.2261 | 1.0593 | 0.0020 | 0.0217 |
| neg_44   | Cer(d16:2/19:1)         | neg | C36 H66 O5 N1   | 1.1433 | 1.0680 | 0.0285 | 0.1132 |
| neg_46   | Cer(d16:1/21:0)         | neg | C38 H74 O5 N1   | 0.9860 | 1.0410 | 0.0040 | 0.0325 |
| neg_47   | Cer(d16:2/21:1)         | neg | C38 H70 O5 N1   | 1.0063 | 1.0400 | 0.0076 | 0.0508 |
| neg_49   | Cer(d16:1/22:0+O)       | neg | C38 H74 O4 N1   | 0.9762 | 1.0620 | 0.0365 | 0.1362 |
| neg_75   | FA(22:5)                | neg | O2 H33 C22      | 1.2543 | 1.0484 | 0.0010 | 0.0143 |
| neg_77   | GD1a(m19:1/20:4)        | neg | C87 H144 O38 N4 | 0.9308 | 1.0391 | 0.0093 | 0.0575 |
| neg_92   | Hex2Cer(d12:0/16:0)     | neg | C40 H76 O13 N1  | 1.8670 | 1.1690 | 0.0014 | 0.0174 |

|         |                     |     |                   |        |        |        |        |
|---------|---------------------|-----|-------------------|--------|--------|--------|--------|
| neg_95  | Hex2Cer(d24:0/22:6) | neg | C60 H104 O15 N1   | 1.8722 | 1.1911 | 0.0142 | 0.0732 |
| neg_96  | Hex3Cer(m21:1/22:6) | neg | C61 H102 O17 N1   | 1.9874 | 1.2181 | 0.0054 | 0.0398 |
| neg_97  | LPE(15:0)           | neg | C20 H41 O7 N1 P1  | 3.0589 | 1.4538 | 0.0000 | 0.0001 |
| neg_110 | LPG(15:0)           | neg | C21 H42 O9 N0 P1  | 2.1452 | 1.2147 | 0.0006 | 0.0113 |
| neg_112 | LPG(16:1)           | neg | C22 H42 O9 N0 P1  | 3.0458 | 1.4016 | 0.0000 | 0.0000 |
| neg_209 | OAHA(18:1/18:0)     | neg | C36 H67 O4        | 1.2754 | 1.0676 | 0.0019 | 0.0211 |
| neg_210 | OAHA(18:1/20:3)     | neg | C38 H65 O4        | 1.2207 | 1.0642 | 0.0025 | 0.0252 |
| neg_211 | OAHA(20:4/20:3)     | neg | C40 H63 O4        | 1.0191 | 1.0463 | 0.0156 | 0.0764 |
| neg_213 | OAHA(22:5/22:4)     | neg | C44 H67 O4        | 1.3433 | 1.0792 | 0.0039 | 0.0325 |
| neg_259 | PC(30:1/20:4)       | neg | C57 H103 O8 N1 P1 | 1.6905 | 1.1480 | 0.0341 | 0.1292 |
| neg_260 | PC(30:1/20:5)       | neg | C57 H101 O8 N1 P1 | 1.9059 | 1.2005 | 0.0126 | 0.0675 |
| neg_261 | PC(28:1/22:6)       | neg | C57 H99 O8 N1 P1  | 1.9446 | 1.2027 | 0.0016 | 0.0196 |
| neg_262 | PC(29:1/22:6)       | neg | C58 H101 O8 N1 P1 | 1.8616 | 1.2263 | 0.0119 | 0.0663 |
| neg_267 | PC(30:1/22:6)       | neg | C59 H103 O8 N1 P1 | 1.9016 | 1.1538 | 0.0027 | 0.0262 |
| neg_268 | PC(31:1/22:6)       | neg | C60 H105 O8 N1 P1 | 1.5269 | 1.1376 | 0.0104 | 0.0613 |
| neg_273 | PC(32:1/22:6)       | neg | C61 H107 O8 N1 P1 | 1.7198 | 1.1278 | 0.0078 | 0.0510 |
| neg_275 | PC(34:1/22:6)       | neg | C63 H111 O8 N1 P1 | 1.7732 | 1.1689 | 0.0173 | 0.0825 |
| neg_278 | PE(16:1/14:0)       | neg | C35 H67 O8 N1 P1  | 2.7438 | 1.3211 | 0.0000 | 0.0000 |
| neg_287 | PE(18:0/16:0)       | neg | C39 H77 O8 N1 P1  | 1.0747 | 1.0515 | 0.0041 | 0.0327 |
| neg_290 | PE(16:0/18:2)       | neg | C39 H73 O8 N1 P1  | 2.9303 | 1.3096 | 0.0000 | 0.0003 |
| neg_297 | PE(17:1/18:1)       | neg | C40 H75 O8 N1 P1  | 1.6968 | 1.1060 | 0.0000 | 0.0015 |
| neg_302 | PE(18:1/18:1)       | neg | C41 H77 O8 N1 P1  | 1.7984 | 1.1038 | 0.0000 | 0.0003 |
| neg_304 | PE(18:1/18:2)       | neg | C41 H75 O8 N1 P1  | 1.6893 | 1.1263 | 0.0006 | 0.0112 |

Supplementary Material

|         |                 |     |                   |        |         |        |        |
|---------|-----------------|-----|-------------------|--------|---------|--------|--------|
| neg_309 | PE(16:1/20:4)   | neg | C41 H71 O8 N1 P1  | 1.4155 | 1.0732  | 0.0002 | 0.0054 |
| neg_371 | PEt(12:0e/22:6) | neg | C39 H66 O7 N0 P1  | 1.2088 | 1.0516  | 0.0015 | 0.0184 |
| neg_385 | PG(15:0/13:0)   | neg | C34 H66 O10 N0 P1 | 1.8987 | 1.2273  | 0.0101 | 0.0605 |
| neg_386 | PG(15:0/15:0)   | neg | C36 H70 O10 N0 P1 | 1.8066 | 1.1773  | 0.0077 | 0.0510 |
| neg_388 | PG(15:0/16:1)   | neg | C37 H70 O10 N0 P1 | 5.0485 | 14.0898 | 0.0000 | 0.0000 |
| neg_389 | PG(16:0/16:1)   | neg | C38 H72 O10 N0 P1 | 2.7107 | 1.3570  | 0.0000 | 0.0005 |
| neg_390 | PG(12:1e/20:4)  | neg | C38 H66 O9 N0 P1  | 1.0138 | 1.0461  | 0.0049 | 0.0368 |
| neg_392 | PG(17:1/16:1)   | neg | C39 H72 O10 N0 P1 | 3.2174 | 1.8002  | 0.0080 | 0.0518 |
| neg_396 | PG(18:0/18:1)   | neg | C42 H80 O10 N0 P1 | 0.9689 | 1.0305  | 0.0000 | 0.0011 |
| neg_397 | PG(18:1/18:1)   | neg | C42 H78 O10 N0 P1 | 2.4988 | 1.3314  | 0.0006 | 0.0112 |
| neg_400 | PG(16:0/20:5)   | neg | C42 H72 O10 N0 P1 | 2.1828 | 1.4694  | 0.0488 | 0.1609 |
| neg_401 | PG(16:1/20:4)   | neg | C42 H72 O10 N0 P1 | 1.7216 | 1.1271  | 0.0006 | 0.0112 |
| neg_402 | PG(16:1/20:5)   | neg | C42 H70 O10 N0 P1 | 2.0066 | 1.1751  | 0.0002 | 0.0056 |
| neg_407 | PG(18:1/20:4)   | neg | C44 H76 O10 N0 P1 | 1.0742 | 1.0538  | 0.0126 | 0.0675 |
| neg_408 | PG(16:1/22:5)   | neg | C44 H74 O10 N0 P1 | 2.1898 | 1.2565  | 0.0007 | 0.0114 |
| neg_409 | PG(18:1/20:5)   | neg | C44 H74 O10 N0 P1 | 1.5369 | 1.1048  | 0.0025 | 0.0252 |
| neg_432 | PI(16:1e/20:4)  | neg | C45 H78 O12 N0 P1 | 1.0376 | 1.0428  | 0.0010 | 0.0148 |
| neg_434 | PI(14:0/22:6)   | neg | C45 H74 O13 N0 P1 | 1.6363 | 1.1649  | 0.0238 | 0.1049 |
| neg_455 | PI(22:5/22:6)   | neg | C53 H80 O13 N0 P1 | 1.6784 | 1.1686  | 0.0182 | 0.0853 |
| neg_458 | PMe(16:1/16:1)  | neg | C36 H66 O8 N0 P1  | 2.8475 | 1.4050  | 0.0000 | 0.0000 |
| neg_459 | PMe(16:1/18:1)  | neg | C38 H70 O8 N0 P1  | 3.1707 | 1.4927  | 0.0000 | 0.0000 |
| neg_461 | PS(16:1/18:2)   | neg | C40 H71 O10 N1 P1 | 2.9759 | 1.3780  | 0.0000 | 0.0000 |
| neg_462 | PS(16:1/18:3)   | neg | C40 H69 O10 N1 P1 | 3.3426 | 1.5192  | 0.0000 | 0.0000 |



|         |                   |     |                   |        |        |        |        |
|---------|-------------------|-----|-------------------|--------|--------|--------|--------|
| neg_465 | PS(18:1/18:2)     | neg | C42 H75 O10 N1 P1 | 1.7740 | 1.1112 | 0.0000 | 0.0003 |
| neg_484 | PS(18:3/20:5)     | neg | C44 H69 O10 N1 P1 | 2.3912 | 1.4796 | 0.0329 | 0.1261 |
| neg_498 | PS(18:2/22:6)     | neg | C46 H73 O10 N1 P1 | 1.3548 | 1.1150 | 0.0353 | 0.1328 |
| neg_501 | PS(18:3/22:6)     | neg | C46 H71 O10 N1 P1 | 1.1545 | 1.0754 | 0.0409 | 0.1455 |
| neg_545 | dMePE(16:1e/14:0) | neg | C37 H73 O7 N1 P1  | 1.6508 | 1.1153 | 0.0012 | 0.0156 |
| neg_546 | dMePE(16:1/14:1)  | neg | C37 H69 O8 N1 P1  | 3.3704 | 1.4639 | 0.0000 | 0.0000 |

**1.6 Table S6. Lower abundant levels of lipid species in vacuum-packaged (VP) pike eels in comparison with fresh (FE) pike eels via LC-MS/MS analysis.**

| ID      | Lipids                  | Mode | Formula              | VIP    | FC     | <i>P</i> value | FDR    |
|---------|-------------------------|------|----------------------|--------|--------|----------------|--------|
| pos_16  | BisMePA(18:0/20:5)      | pos  | C43 H79 O8 N1 P1     | 1.6024 | 0.9535 | 0.0016         | 0.0722 |
| pos_27  | BisMePA(22:6/22:6)      | pos  | C49 H77 O8 N1 P1     | 1.7568 | 0.9406 | 0.0024         | 0.0850 |
| pos_29  | CL(20:5/20:4/22:4/24:1) | pos  | C95 H159 O17 P2      | 3.1060 | 0.8246 | 0.0000         | 0.0001 |
| pos_327 | LPC(16:1)               | pos  | C24 H49 O7 N1 P1     | 1.8296 | 0.9288 | 0.0345         | 0.2501 |
| pos_331 | LPC(17:1)               | pos  | C25 H51 O7 N1 P1     | 1.6180 | 0.9365 | 0.0459         | 0.2889 |
| pos_340 | LPC(18:4)               | pos  | C26 H47 O7 N1 P1     | 1.8919 | 0.9104 | 0.0109         | 0.1580 |
| pos_347 | LPC(20:2)               | pos  | C28 H54 O7 N1 P1 Na1 | 1.8589 | 0.9222 | 0.0311         | 0.2418 |
| pos_349 | LPC(20:3)               | pos  | C28 H53 O7 N1 P1     | 1.7114 | 0.9329 | 0.0198         | 0.1993 |
| pos_351 | LPC(20:4)               | pos  | C28 H50 O7 N1 P1 Na1 | 2.8179 | 0.8169 | 0.0003         | 0.0219 |
| pos_353 | LPC(20:5)               | pos  | C28 H48 O7 N1 P1 Na1 | 2.0274 | 0.9060 | 0.0198         | 0.1993 |
| pos_359 | LPC(22:4)               | pos  | C30 H54 O7 N1 P1 Na1 | 1.8210 | 0.9152 | 0.0344         | 0.2501 |
| pos_360 | LPC(22:5)               | pos  | C30 H52 O7 N1 P1 Na1 | 2.3264 | 0.8878 | 0.0042         | 0.1022 |
| pos_370 | LPC(30:0)               | pos  | C38 H78 O7 N1 P1 Na1 | 1.1229 | 0.9685 | 0.0369         | 0.2648 |
| pos_373 | LPC(32:0)               | pos  | C40 H82 O7 N1 P1 Na1 | 1.2869 | 0.9608 | 0.0239         | 0.2168 |
| pos_384 | LPE(20:4)               | pos  | C25 H44 O7 N1 P1 Na1 | 0.9854 | 0.9716 | 0.0467         | 0.2905 |
| pos_390 | LdMePE(18:1)            | pos  | C25 H51 O7 N1 P1     | 1.6185 | 0.9365 | 0.0457         | 0.2889 |
| pos_409 | MePC(16:0/16:1)         | pos  | C41 H84 O8 N2 P1     | 1.5641 | 0.9545 | 0.0047         | 0.1064 |
| pos_412 | MePC(10:0/22:3)         | pos  | C41 H80 O8 N2 P1     | 1.6162 | 0.9142 | 0.0268         | 0.2258 |
| pos_440 | MePC(18:1/18:2)         | pos  | C45 H84 O8 N1 P1 Na1 | 1.7892 | 0.9427 | 0.0009         | 0.0546 |
| pos_445 | MePC(16:1/20:5)         | pos  | C45 H78 O8 N1 P1 Na1 | 2.1927 | 0.8659 | 0.0080         | 0.1380 |

---

|         |                 |     |                      |        |        |        |        |
|---------|-----------------|-----|----------------------|--------|--------|--------|--------|
| pos_447 | MePC(18:4/18:3) | pos | C45 H76 O8 N1 P1 Na1 | 1.9320 | 0.9040 | 0.0018 | 0.0730 |
| pos_449 | MePC(22:6/14:2) | pos | C45 H74 O8 N1 P1 Na1 | 1.4793 | 0.9506 | 0.0139 | 0.1787 |
| pos_450 | MePC(19:0/18:2) | pos | C46 H88 O8 N1 P1 Na1 | 1.4243 | 0.9629 | 0.0018 | 0.0730 |
| pos_458 | MePC(16:1/22:6) | pos | C47 H80 O8 N1 P1 Na1 | 1.9371 | 0.9093 | 0.0080 | 0.1380 |
| pos_468 | MePC(18:2/22:6) | pos | C49 H82 O8 N1 P1 Na1 | 1.6638 | 0.9226 | 0.0202 | 0.2005 |
| pos_481 | PC(8:0e/11:4)   | pos | C27 H49 O7 N1 P1     | 2.0205 | 0.8837 | 0.0177 | 0.1953 |
| pos_493 | PC(4:0/18:2)    | pos | C30 H57 O8 N1 P1     | 1.2708 | 0.9520 | 0.0491 | 0.2974 |
| pos_501 | PC(11:0/16:0)   | pos | C35 H71 O8 N1 P1     | 2.0600 | 0.8900 | 0.0037 | 0.0954 |
| pos_504 | PC(14:0/14:0)   | pos | C36 H72 O8 N1 P1 Na1 | 2.1034 | 0.8843 | 0.0210 | 0.2036 |
| pos_506 | PC(16:0/13:0)   | pos | C37 H75 O8 N1 P1     | 1.5902 | 0.9211 | 0.0324 | 0.2469 |
| pos_509 | PC(16:1/13:0)   | pos | C37 H73 O8 N1 P1     | 2.4536 | 0.8435 | 0.0014 | 0.0722 |
| pos_513 | PC(14:0e/16:0)  | pos | C38 H79 O7 N1 P1     | 0.9387 | 0.9811 | 0.0294 | 0.2345 |
| pos_514 | PC(16:1/14:0)   | pos | C38 H74 O8 N1 P1 Na1 | 2.1179 | 0.9042 | 0.0035 | 0.0931 |
| pos_518 | PC(12:0/18:2)   | pos | C38 H73 O8 N1 P1     | 1.8585 | 0.8853 | 0.0337 | 0.2501 |
| pos_520 | PC(14:1e/16:1)  | pos | C38 H75 O7 N1 P1     | 1.6014 | 0.9280 | 0.0416 | 0.2767 |
| pos_522 | PC(8:0/22:3)    | pos | C38 H71 O8 N1 P1     | 2.1034 | 0.8843 | 0.0210 | 0.2036 |
| pos_534 | PC(16:0/16:0)   | pos | C40 H81 O8 N1 P1     | 1.0214 | 0.9724 | 0.0431 | 0.2802 |
| pos_536 | PC(16:0/16:1)   | pos | C40 H78 O8 N1 P1 Na1 | 1.3841 | 0.9562 | 0.0345 | 0.2501 |
| pos_540 | PC(16:1/16:1)   | pos | C40 H76 O8 N1 P1 Na1 | 1.7167 | 0.9346 | 0.0106 | 0.1580 |
| pos_543 | PC(10:0/22:3)   | pos | C40 H75 O8 N1 P1     | 2.4206 | 0.8730 | 0.0026 | 0.0850 |
| pos_554 | PC(17:1/16:0)   | pos | C41 H80 O8 N1 P1 Na1 | 1.9588 | 0.9235 | 0.0037 | 0.0954 |
| pos_557 | PC(15:0/18:2)   | pos | C41 H79 O8 N1 P1     | 1.5871 | 0.9519 | 0.0045 | 0.1064 |
| pos_569 | PC(16:1e/18:0)  | pos | C42 H85 O7 N1 P1     | 0.9981 | 0.9797 | 0.0442 | 0.2827 |

---

## Supplementary Material

|         |                |     |                      |        |        |        |        |
|---------|----------------|-----|----------------------|--------|--------|--------|--------|
| pos_572 | PC(16:0/18:2)  | pos | C42 H80 O8 N1 P1 NaI | 2.2908 | 0.9082 | 0.0002 | 0.0162 |
| pos_573 | PC(16:0e/18:2) | pos | C42 H83 O7 N1 P1     | 1.3694 | 0.9603 | 0.0135 | 0.1787 |
| pos_576 | PC(16:0/18:3)  | pos | C42 H78 O8 N1 P1 NaI | 1.8048 | 0.9337 | 0.0017 | 0.0722 |
| pos_579 | PC(16:1/18:3)  | pos | C42 H77 O8 N1 P1     | 1.9553 | 0.8759 | 0.0322 | 0.2469 |
| pos_583 | PC(14:0/20:5)  | pos | C42 H74 O8 N1 P1 NaI | 2.2288 | 0.8957 | 0.0012 | 0.0624 |
| pos_601 | PC(17:1/18:3)  | pos | C43 H79 O8 N1 P1     | 1.5486 | 0.9374 | 0.0280 | 0.2301 |
| pos_610 | PC(18:1/18:1)  | pos | C44 H84 O8 N1 P1 NaI | 1.6724 | 0.9555 | 0.0006 | 0.0436 |
| pos_617 | PC(18:1e/18:2) | pos | C44 H85 O7 N1 P1     | 1.1841 | 0.9710 | 0.0137 | 0.1787 |
| pos_619 | PC(18:4/18:0)  | pos | C44 H81 O8 N1 P1     | 1.7112 | 0.9409 | 0.0172 | 0.1941 |
| pos_623 | PC(16:0/20:5)  | pos | C44 H78 O8 N1 P1 NaI | 2.0737 | 0.9241 | 0.0021 | 0.0800 |
| pos_627 | PC(14:1e/22:4) | pos | C44 H81 O7 N1 P1     | 1.1302 | 0.9709 | 0.0148 | 0.1864 |
| pos_629 | PC(14:0/22:6)  | pos | C44 H76 O8 N1 P1 NaI | 1.9005 | 0.9286 | 0.0025 | 0.0850 |
| pos_643 | PC(19:1/18:3)  | pos | C45 H83 O8 N1 P1     | 1.7693 | 0.9340 | 0.0069 | 0.1280 |
| pos_644 | PC(15:0/22:4)  | pos | C45 H83 O8 N1 P1     | 0.9762 | 0.9766 | 0.0373 | 0.2648 |
| pos_648 | PC(17:0/20:5)  | pos | C45 H80 O8 N1 P1 NaI | 1.7165 | 0.9288 | 0.0086 | 0.1397 |
| pos_651 | PC(17:1/20:5)  | pos | C45 H78 O8 N1 P1 NaI | 1.8633 | 0.9308 | 0.0015 | 0.0722 |
| pos_656 | PC(20:1/18:1)  | pos | C46 H88 O8 N1 P1 NaI | 1.2467 | 0.9612 | 0.0336 | 0.2501 |
| pos_662 | PC(16:0/22:4)  | pos | C46 H84 O8 N1 P1 NaI | 1.7755 | 0.9280 | 0.0177 | 0.1953 |
| pos_668 | PC(18:0/20:5)  | pos | C46 H82 O8 N1 P1 NaI | 1.8481 | 0.9364 | 0.0016 | 0.0722 |
| pos_674 | PC(16:1/22:5)  | pos | C46 H81 O8 N1 P1     | 1.8022 | 0.9238 | 0.0130 | 0.1765 |
| pos_675 | PC(18:1/20:5)  | pos | C46 H80 O8 N1 P1 NaI | 1.6822 | 0.9419 | 0.0084 | 0.1397 |
| pos_679 | PC(20:5/18:2)  | pos | C46 H78 O8 N1 P1 NaI | 1.4981 | 0.9431 | 0.0200 | 0.1993 |
| pos_684 | PC(18:3/20:5)  | pos | C46 H76 O8 N1 P1 NaI | 2.2184 | 0.8831 | 0.0032 | 0.0912 |

|         |                |     |                      |        |        |        |        |
|---------|----------------|-----|----------------------|--------|--------|--------|--------|
| pos_686 | PC(18:4/20:5)  | pos | C46 H74 O8 N1 P1 Na1 | 2.2969 | 0.8340 | 0.0198 | 0.1993 |
| pos_689 | PC(17:0/22:3)  | pos | C47 H89 O8 N1 P1     | 0.9275 | 0.9790 | 0.0418 | 0.2774 |
| pos_690 | PC(19:1/20:2)  | pos | C47 H89 O8 N1 P1     | 1.2943 | 0.9541 | 0.0386 | 0.2682 |
| pos_692 | PC(19:1/20:3)  | pos | C47 H87 O8 N1 P1     | 1.5472 | 0.9522 | 0.0018 | 0.0730 |
| pos_699 | PC(17:1/22:5)  | pos | C47 H82 O8 N1 P1 Na1 | 2.4979 | 0.8554 | 0.0133 | 0.1787 |
| pos_703 | PC(20:5/20:5)  | pos | C48 H76 O8 N1 P1 Na1 | 1.9528 | 0.9160 | 0.0019 | 0.0730 |
| pos_705 | PC(16:0/24:2)  | pos | C48 H93 O8 N1 P1     | 1.0457 | 0.9704 | 0.0473 | 0.2918 |
| pos_729 | PC(20:5/20:4)  | pos | C48 H78 O8 N1 P1 Na1 | 2.0851 | 0.8728 | 0.0253 | 0.2239 |
| pos_730 | PC(18:3/22:6)  | pos | C48 H79 O8 N1 P1     | 1.7252 | 0.9289 | 0.0153 | 0.1907 |
| pos_732 | PC(18:3e/22:6) | pos | C48 H81 O7 N1 P1     | 1.9779 | 0.9030 | 0.0082 | 0.1384 |
| pos_743 | PC(20:5/22:6)  | pos | C50 H78 O8 N1 P1 Na1 | 1.8410 | 0.9285 | 0.0061 | 0.1197 |
| pos_744 | PC(26:1/16:1)  | pos | C50 H97 O8 N1 P1     | 0.9777 | 0.9748 | 0.0269 | 0.2258 |
| pos_745 | PC(20:0/22:4)  | pos | C50 H93 O8 N1 P1     | 1.6432 | 0.9359 | 0.0044 | 0.1056 |
| pos_747 | PC(20:0/22:5)  | pos | C50 H91 O8 N1 P1     | 1.6662 | 0.9387 | 0.0041 | 0.1010 |
| pos_748 | PC(31:1/11:4)  | pos | C50 H91 O8 N1 P1     | 1.6413 | 0.9352 | 0.0101 | 0.1561 |
| pos_752 | PC(20:2e/22:4) | pos | C50 H90 O7 N1 P1 Na1 | 1.1088 | 0.9652 | 0.0431 | 0.2802 |
| pos_761 | PC(22:6/21:0)  | pos | C51 H91 O8 N1 P1     | 1.9211 | 0.9229 | 0.0021 | 0.0800 |
| pos_762 | PC(22:6/21:1)  | pos | C51 H89 O8 N1 P1     | 1.6239 | 0.9195 | 0.0191 | 0.1993 |
| pos_765 | PC(22:6/22:6)  | pos | C52 H80 O8 N1 P1 Na1 | 1.2835 | 0.9596 | 0.0386 | 0.2682 |
| pos_771 | PC(22:1/22:6)  | pos | C52 H91 O8 N1 P1     | 1.9939 | 0.9167 | 0.0036 | 0.0954 |
| pos_774 | PC(24:1/22:6)  | pos | C54 H95 O8 N1 P1     | 2.1158 | 0.9163 | 0.0002 | 0.0175 |
| pos_798 | PE(18:0/18:1)  | pos | C41 H80 O8 N1 P1 Na1 | 1.6459 | 0.9523 | 0.0008 | 0.0486 |
| pos_812 | PE(18:0/20:4)  | pos | C43 H79 O8 N1 P1     | 1.6024 | 0.9533 | 0.0016 | 0.0722 |

# Supplementary Material

|         |                |     |                      |        |        |        |        |
|---------|----------------|-----|----------------------|--------|--------|--------|--------|
| pos_827 | PE(18:0/22:5)  | pos | C45 H81 O8 N1 P1     | 1.5152 | 0.9576 | 0.0007 | 0.0453 |
| pos_831 | PE(18:0/22:6)  | pos | C45 H79 O8 N1 P1     | 1.2657 | 0.9721 | 0.0015 | 0.0722 |
| pos_833 | PE(18:1p/22:5) | pos | C45 H79 O7 N1 P1     | 0.8965 | 0.9808 | 0.0273 | 0.2266 |
| pos_835 | PE(18:1/22:6)  | pos | C45 H76 O8 N1 P1 NaI | 1.1475 | 0.9681 | 0.0222 | 0.2099 |
| pos_837 | PE(18:2/22:6)  | pos | C45 H74 O8 N1 P1 NaI | 1.4793 | 0.9506 | 0.0139 | 0.1787 |
| pos_840 | PE(20:4/22:6)  | pos | C47 H75 O8 N1 P1     | 1.5664 | 0.9339 | 0.0337 | 0.2501 |
| pos_841 | PE(20:5/22:6)  | pos | C47 H73 O8 N1 P1     | 1.4832 | 0.9503 | 0.0135 | 0.1787 |
| pos_845 | PE(22:5/22:6)  | pos | C49 H77 O8 N1 P1     | 1.7571 | 0.9408 | 0.0024 | 0.0850 |
| pos_880 | PI(18:0/20:4)  | pos | C47 H87 O13 N1 P1    | 2.2107 | 0.8846 | 0.0122 | 0.1737 |
| pos_883 | PI(18:0/22:6)  | pos | C49 H87 O13 N1 P1    | 2.0629 | 0.9034 | 0.0266 | 0.2258 |
| pos_911 | PS(18:0/18:1)  | pos | C42 H81 O10 N1 P1    | 2.4629 | 0.8535 | 0.0030 | 0.0912 |
| pos_914 | PS(18:0/22:5)  | pos | C46 H81 O10 N1 P1    | 2.2446 | 0.8855 | 0.0023 | 0.0831 |
| pos_915 | PS(18:0/22:6)  | pos | C46 H79 O10 N1 P1    | 2.0543 | 0.9018 | 0.0253 | 0.2239 |
| pos_925 | SM(d16:1/16:1) | pos | C37 H74 O6 N2 P1     | 1.1560 | 0.9630 | 0.0329 | 0.2486 |
| pos_934 | SM(d18:2/16:0) | pos | C39 H78 O6 N2 P1     | 1.2288 | 0.9618 | 0.0266 | 0.2258 |
| pos_946 | SM(d18:2/18:3) | pos | C41 H76 O6 N2 P1     | 1.9075 | 0.8916 | 0.0310 | 0.2418 |
| pos_949 | SM(d18:2/19:1) | pos | C42 H82 O6 N2 P1     | 1.3083 | 0.9667 | 0.0126 | 0.1765 |
| pos_951 | SM(d16:1/21:3) | pos | C42 H80 O6 N2 P1     | 1.2861 | 0.9496 | 0.0477 | 0.2928 |
| pos_955 | SM(d16:1/22:0) | pos | C43 H87 O6 N2 P1 NaI | 1.4669 | 0.9558 | 0.0100 | 0.1561 |
| pos_958 | SM(d16:1/22:2) | pos | C43 H84 O6 N2 P1     | 1.1337 | 0.9675 | 0.0427 | 0.2799 |
| pos_963 | SM(d18:0/21:2) | pos | C44 H88 O6 N2 P1     | 1.1723 | 0.9677 | 0.0479 | 0.2928 |
| pos_966 | SM(d18:0/21:3) | pos | C44 H86 O6 N2 P1     | 1.2251 | 0.9646 | 0.0235 | 0.2147 |
| pos_968 | SM(d18:1/21:5) | pos | C44 H80 O6 N2 P1     | 1.5245 | 0.9474 | 0.0165 | 0.1916 |

|          |                         |     |                      |        |        |        |        |
|----------|-------------------------|-----|----------------------|--------|--------|--------|--------|
| pos_971  | SM(d16:1/24:1)          | pos | C45 H89 O6 N2 P1 Na1 | 1.5872 | 0.9541 | 0.0068 | 0.1273 |
| pos_975  | SM(d16:1/24:3)          | pos | C45 H86 O6 N2 P1     | 1.4886 | 0.9548 | 0.0087 | 0.1397 |
| pos_980  | SM(d18:1/22:6)          | pos | C45 H80 O6 N2 P1     | 1.6427 | 0.9207 | 0.0282 | 0.2301 |
| pos_982  | SM(d18:1/23:1)          | pos | C46 H92 O6 N2 P1     | 1.2316 | 0.9661 | 0.0435 | 0.2802 |
| pos_984  | SM(d20:0/21:3)          | pos | C46 H90 O6 N2 P1     | 1.2454 | 0.9617 | 0.0412 | 0.2767 |
| pos_986  | SM(d18:1/23:4)          | pos | C46 H86 O6 N2 P1     | 1.5649 | 0.9379 | 0.0231 | 0.2138 |
| pos_987  | SM(d18:1/23:5)          | pos | C46 H84 O6 N2 P1     | 1.7048 | 0.9275 | 0.0047 | 0.1064 |
| pos_988  | SM(d18:1/24:0)          | pos | C47 H96 O6 N2 P1     | 1.2665 | 0.9642 | 0.0213 | 0.2054 |
| pos_989  | SM(d18:1/24:1)          | pos | C47 H94 O6 N2 P1     | 1.9704 | 0.8980 | 0.0381 | 0.2673 |
| pos_991  | SM(d18:1/24:3)          | pos | C47 H90 O6 N2 P1     | 1.4771 | 0.9440 | 0.0442 | 0.2827 |
| pos_992  | SM(d19:1/23:3)          | pos | C47 H90 O6 N2 P1     | 1.2169 | 0.9685 | 0.0109 | 0.1580 |
| pos_993  | SM(d18:2/24:3)          | pos | C47 H88 O6 N2 P1     | 1.5568 | 0.9551 | 0.0086 | 0.1397 |
| pos_997  | SM(d19:0/24:4)          | pos | C48 H92 O6 N2 P1     | 1.2460 | 0.9648 | 0.0434 | 0.2802 |
| pos_1006 | SM(d20:0/24:6)          | pos | C49 H90 O6 N2 P1     | 1.1952 | 0.9625 | 0.0461 | 0.2889 |
| pos_1017 | SM(t18:1/24:0)          | pos | C47 H96 O7 N2 P1     | 1.6176 | 0.9338 | 0.0164 | 0.1916 |
| pos_1256 | TG(15:0/16:1/18:3)      | pos | C52 H96 O6 N1        | 0.9542 | 0.9829 | 0.0089 | 0.1397 |
| pos_1398 | TG(11:0/20:4/22:5)      | pos | C62 H106 O6 N2       | 1.4156 | 0.9620 | 0.0079 | 0.1380 |
| pos_1432 | TG(16:0/18:3/20:4)      | pos | C57 H96 O6 Li1       | 2.6488 | 0.8359 | 0.0053 | 0.1094 |
| pos_1523 | TG(18:3/18:2/20:4)      | pos | C59 H100 O6 N1       | 1.4433 | 0.9599 | 0.0169 | 0.1929 |
| pos_1803 | TG(19:1/22:6/24:1)      | pos | C68 H120 O6 N1       | 1.6445 | 0.9328 | 0.0210 | 0.2036 |
| neg_9    | CL(24:0/14:0/16:0/18:0) | neg | C81 H156 O17 P2      | 1.2031 | 0.9385 | 0.0039 | 0.0325 |
| neg_14   | CL(23:0/15:0/16:0/20:0) | neg | C83 H160 O17 P2      | 1.1014 | 0.9561 | 0.0038 | 0.0325 |
| neg_19   | CL(24:0/16:0/16:0/20:0) | neg | C85 H164 O17 P2      | 0.9602 | 0.9677 | 0.0000 | 0.0005 |

# Supplementary Material

|         |                         |     |                      |        |        |        |        |
|---------|-------------------------|-----|----------------------|--------|--------|--------|--------|
| neg_31  | CL(23:0/16:0/18:0/22:6) | neg | C88 H159 O17 P2      | 1.4172 | 0.9282 | 0.0003 | 0.0076 |
| neg_34  | CL(21:0/16:0/22:5/22:6) | neg | C90 H153 O17 P2      | 1.2878 | 0.9323 | 0.0017 | 0.0199 |
| neg_141 | LdMePE(18:2)            | neg | C25 H47 O7 N1 P1     | 1.2311 | 0.9336 | 0.0098 | 0.0592 |
| neg_142 | LdMePE(18:3)            | neg | C25 H45 O7 N1 P1     | 1.2837 | 0.9116 | 0.0085 | 0.0541 |
| neg_150 | LdMePE(20:4)            | neg | C27 H47 O7 N1 P1     | 1.0046 | 0.9524 | 0.0482 | 0.1607 |
| neg_151 | LdMePE(20:5)            | neg | C27 H45 O7 N1 P1     | 1.2776 | 0.9338 | 0.0145 | 0.0732 |
| neg_153 | LdMePE(22:5)            | neg | C29 H49 O7 N1 P1     | 1.3939 | 0.9124 | 0.0369 | 0.1371 |
| neg_154 | LdMePE(22:6)            | neg | C29 H47 O7 N1 P1     | 1.1659 | 0.9490 | 0.0146 | 0.0732 |
| neg_184 | MLCL(14:2/15:0/15:0)    | neg | C53 H98 O16 P2       | 1.0286 | 0.9410 | 0.0410 | 0.1455 |
| neg_190 | MLCL(11:2/16:1/22:4)    | neg | C58 H98 O16 P2       | 1.5427 | 0.8860 | 0.0285 | 0.1132 |
| neg_193 | MLCL(14:2/18:2/18:2)    | neg | C59 H102 O16 P2      | 1.0769 | 0.9438 | 0.0478 | 0.1605 |
| neg_195 | MLCL(11:3/20:4/22:6)    | neg | C62 H94 O16 P2       | 1.0403 | 0.9368 | 0.0461 | 0.1581 |
| neg_196 | MLCL(14:2/20:4/20:4)    | neg | C63 H102 O16 P2      | 1.1366 | 0.9517 | 0.0191 | 0.0868 |
| neg_200 | MLCL(14:2/20:3/20:3)    | neg | C63 H106 O16 P2      | 1.0945 | 0.9411 | 0.0468 | 0.1585 |
| neg_203 | MLCL(14:2/22:6/22:6)    | neg | C67 H102 O16 P2      | 1.1135 | 0.9561 | 0.0188 | 0.0866 |
| neg_206 | MLCL(18:4/20:4/22:6)    | neg | C69 H106 O16 P2      | 1.6014 | 0.8820 | 0.0059 | 0.0430 |
| neg_224 | PC(17:1/16:1)           | neg | C42 H79 O10 N1 P1    | 1.0097 | 0.9624 | 0.0006 | 0.0112 |
| neg_227 | PC(14:0/20:4)           | neg | C43 H77 O10 N1 P1    | 1.3118 | 0.9412 | 0.0002 | 0.0056 |
| neg_241 | PC(18:2e/20:4)          | neg | C46 H82 O7 N1 P1 Cl1 | 1.4262 | 0.9333 | 0.0004 | 0.0078 |
| neg_256 | PC(24:0/22:6)           | neg | C55 H97 O10 N1 P1    | 3.5298 | 0.2071 | 0.0110 | 0.0631 |
| neg_333 | PE(16:1/22:5)           | neg | C43 H73 O8 N1 P1     | 1.1700 | 0.9319 | 0.0298 | 0.1167 |
| neg_342 | PE(19:0/20:4)           | neg | C44 H79 O8 N1 P1     | 1.4169 | 0.9010 | 0.0262 | 0.1092 |
| neg_360 | PE(19:1/22:6)           | neg | C46 H77 O8 N1 P1     | 1.3762 | 0.9171 | 0.0070 | 0.0496 |



|         |                  |     |                   |        |        |        |        |
|---------|------------------|-----|-------------------|--------|--------|--------|--------|
| neg_403 | PG(14:0/22:6)    | neg | C42 H70 O10 N0 P1 | 1.4787 | 0.9008 | 0.0032 | 0.0291 |
| neg_417 | PG(20:4/22:6)    | neg | C48 H74 O10 N0 P1 | 1.0354 | 0.9478 | 0.0073 | 0.0498 |
| neg_422 | PG(28:1/20:5)    | neg | C54 H94 O10 N0 P1 | 1.0511 | 0.9398 | 0.0372 | 0.1372 |
| neg_435 | PI(17:0/20:4)    | neg | C46 H80 O13 N0 P1 | 1.0028 | 0.9544 | 0.0094 | 0.0577 |
| neg_439 | PI(18:0/20:5)    | neg | C47 H80 O13 N0 P1 | 1.2336 | 0.9400 | 0.0103 | 0.0609 |
| neg_443 | PI(19:0/20:4)    | neg | C48 H84 O13 N0 P1 | 1.1578 | 0.9487 | 0.0072 | 0.0498 |
| neg_444 | PI(17:0/22:6)    | neg | C48 H80 O13 N0 P1 | 1.2271 | 0.9387 | 0.0069 | 0.0490 |
| neg_446 | PI(18:0/22:4)    | neg | C49 H86 O13 N0 P1 | 1.3736 | 0.9068 | 0.0121 | 0.0670 |
| neg_447 | PI(18:0/22:5)    | neg | C49 H84 O13 N0 P1 | 1.3993 | 0.9208 | 0.0111 | 0.0631 |
| neg_457 | PIP2(20:4e/19:0) | neg | C48 H88 O18 N0 P3 | 1.2016 | 0.9306 | 0.0298 | 0.1167 |
| neg_468 | PS(18:0/19:0)    | neg | C43 H83 O10 N1 P1 | 1.1159 | 0.9627 | 0.0022 | 0.0230 |
| neg_472 | PS(18:0/20:0)    | neg | C44 H85 O10 N1 P1 | 1.3272 | 0.9313 | 0.0024 | 0.0245 |
| neg_475 | PS(18:0/20:4)    | neg | C44 H77 O10 N1 P1 | 1.5603 | 0.8937 | 0.0044 | 0.0348 |
| neg_487 | PS(19:0/20:5)    | neg | C45 H77 O10 N1 P1 | 1.0496 | 0.9478 | 0.0384 | 0.1408 |
| neg_488 | PS(17:0/22:6)    | neg | C45 H75 O10 N1 P1 | 1.1477 | 0.9317 | 0.0145 | 0.0732 |
| neg_492 | PS(20:0/20:5)    | neg | C46 H79 O10 N1 P1 | 1.1970 | 0.9479 | 0.0017 | 0.0199 |
| neg_505 | PS(20:5/21:0)    | neg | C47 H81 O10 N1 P1 | 1.0865 | 0.9583 | 0.0029 | 0.0268 |
| neg_510 | PS(20:0/22:6)    | neg | C48 H81 O10 N1 P1 | 1.1187 | 0.9585 | 0.0007 | 0.0113 |
| neg_513 | PS(20:1/22:6)    | neg | C48 H79 O10 N1 P1 | 1.3297 | 0.9328 | 0.0008 | 0.0122 |
| neg_514 | PS(20:2/22:5)    | neg | C48 H79 O10 N1 P1 | 1.3264 | 0.9138 | 0.0242 | 0.1049 |
| neg_526 | PS(22:6/23:0)    | neg | C51 H87 O10 N1 P1 | 1.1775 | 0.9531 | 0.0002 | 0.0046 |
| neg_527 | PS(25:0/22:6)    | neg | C53 H91 O10 N1 P1 | 1.2879 | 0.9058 | 0.0263 | 0.1092 |
| neg_528 | PS(27:0/22:6)    | neg | C55 H95 O10 N1 P1 | 1.7556 | 0.8750 | 0.0259 | 0.1092 |

# Supplementary Material

|         |                  |     |                  |        |        |        |        |
|---------|------------------|-----|------------------|--------|--------|--------|--------|
| neg_540 | dMePE(14:0/14:0) | neg | C35 H69 O8 N1 P1 | 1.8515 | 0.8609 | 0.0003 | 0.0064 |
| neg_542 | dMePE(16:0/14:0) | neg | C37 H73 O8 N1 P1 | 1.2186 | 0.9339 | 0.0122 | 0.0670 |
| neg_544 | dMePE(16:1/14:0) | neg | C37 H71 O8 N1 P1 | 1.7018 | 0.8650 | 0.0048 | 0.0367 |
| neg_547 | dMePE(15:0/16:0) | neg | C38 H75 O8 N1 P1 | 1.8021 | 0.8599 | 0.0048 | 0.0367 |
| neg_557 | dMePE(16:0/18:1) | neg | C41 H79 O8 N1 P1 | 1.1191 | 0.9571 | 0.0031 | 0.0283 |
| neg_561 | dMePE(14:0/20:4) | neg | C41 H73 O8 N1 P1 | 1.6275 | 0.8916 | 0.0009 | 0.0143 |
| neg_562 | dMePE(14:0/20:5) | neg | C41 H71 O8 N1 P1 | 1.6224 | 0.8900 | 0.0006 | 0.0113 |
| neg_573 | dMePE(16:0/20:5) | neg | C43 H75 O8 N1 P1 | 1.4212 | 0.9337 | 0.0001 | 0.0046 |
| neg_577 | dMePE(14:0/22:6) | neg | C43 H73 O8 N1 P1 | 1.1901 | 0.9475 | 0.0008 | 0.0132 |
| neg_586 | dMePE(16:0/22:6) | neg | C45 H77 O8 N1 P1 | 1.0950 | 0.9634 | 0.0000 | 0.0015 |
| neg_598 | dMePE(20:5/20:4) | neg | C47 H75 O8 N1 P1 | 0.9896 | 0.9496 | 0.0245 | 0.1054 |
| neg_601 | dMePE(20:5/22:6) | neg | C49 H75 O8 N1 P1 | 1.1175 | 0.9496 | 0.0041 | 0.0329 |

**1.7 Table S7. Higher abundant levels of lipid species in simple-packaged (SP) pike eels in comparison with vacuum-packaged (VP) pike eels via LC-MS/MS analysis.**

| ID      | Lipids                  | Mode | Formula          | VIP    | FC     | <i>P</i> value | FDR    |
|---------|-------------------------|------|------------------|--------|--------|----------------|--------|
| pos_16  | BisMePA(18:0/20:5)      | pos  | C43 H79 O8 N1 P1 | 1.0659 | 1.0851 | 0.0001         | 0.0024 |
| pos_29  | CL(20:5/20:4/22:4/24:1) | pos  | C95 H159 O17 P2  | 1.4678 | 1.2322 | 0.0002         | 0.0026 |
| pos_36  | Cer(d16:1/16:0)         | pos  | C32 H62 O2 N1    | 1.2487 | 1.1945 | 0.0015         | 0.0061 |
| pos_54  | Cer(d16:0/24:1)         | pos  | C40 H80 O3 N1    | 1.0659 | 1.1132 | 0.0007         | 0.0041 |
| pos_59  | Cer(d19:1/22:0)         | pos  | C41 H82 O3 N1    | 1.0921 | 1.1906 | 0.0253         | 0.0453 |
| pos_62  | Cer(d19:1/23:0)         | pos  | C42 H82 O2 N1    | 1.2093 | 1.2062 | 0.0114         | 0.0251 |
| pos_75  | Cer(m18:0/24:0)         | pos  | C42 H86 O2 N1    | 1.1589 | 1.1324 | 0.0003         | 0.0027 |
| pos_99  | ChE(16:0)               | pos  | C43 H80 O2 N1    | 1.7889 | 1.3135 | 0.0001         | 0.0022 |
| pos_102 | ChE(18:0)               | pos  | C45 H84 O2 N1    | 1.7419 | 1.3108 | 0.0001         | 0.0023 |
| pos_103 | ChE(18:1)               | pos  | C45 H82 O2 N1    | 2.1141 | 1.4211 | 0.0000         | 0.0010 |
| pos_105 | ChE(19:1)               | pos  | C46 H84 O2 N1    | 1.5627 | 1.2595 | 0.0005         | 0.0035 |
| pos_106 | ChE(20:1)               | pos  | C47 H86 O2 N1    | 1.8639 | 1.3943 | 0.0005         | 0.0034 |
| pos_107 | ChE(20:2)               | pos  | C47 H84 O2 N1    | 1.5282 | 1.2301 | 0.0005         | 0.0035 |
| pos_110 | ChE(20:5)               | pos  | C47 H75 O2       | 1.7581 | 1.3388 | 0.0008         | 0.0043 |
| pos_111 | ChE(22:1)               | pos  | C49 H90 O2 N1    | 1.8417 | 1.3788 | 0.0001         | 0.0023 |
| pos_112 | ChE(22:2)               | pos  | C49 H88 O2 N1    | 1.4481 | 1.2212 | 0.0006         | 0.0035 |
| pos_113 | ChE(22:4)               | pos  | C49 H84 O2 N1    | 1.7177 | 1.3079 | 0.0004         | 0.0031 |
| pos_114 | ChE(22:5)               | pos  | C49 H82 O2 N1    | 1.8289 | 1.3202 | 0.0001         | 0.0023 |
| pos_115 | ChE(22:6)               | pos  | C49 H77 O2       | 1.6430 | 1.2826 | 0.0007         | 0.0038 |
| pos_116 | ChE(24:1)               | pos  | C51 H94 O2 N1    | 1.3822 | 1.2216 | 0.0010         | 0.0048 |
| pos_117 | ChE(24:2)               | pos  | C51 H92 O2 N1    | 1.5822 | 1.3106 | 0.0005         | 0.0033 |

## Supplementary Material

|         |                     |     |                  |        |        |        |        |
|---------|---------------------|-----|------------------|--------|--------|--------|--------|
| pos_118 | ChE(30:5)           | pos | C57 H98 O2 N1    | 0.9612 | 1.1067 | 0.0031 | 0.0097 |
| pos_119 | Co(Q10)             | pos | C59 H91 O4       | 1.0550 | 1.1307 | 0.0126 | 0.0271 |
| pos_213 | DG(18:1/20:5)       | pos | C41 H69 O5       | 1.0670 | 1.1510 | 0.0258 | 0.0460 |
| pos_290 | DG(33:0/18:1)       | pos | C54 H108 O5 N1   | 1.1598 | 1.1318 | 0.0048 | 0.0131 |
| pos_299 | Hex1Cer(d16:1/16:0) | pos | C38 H74 O8 N1    | 1.1540 | 1.1505 | 0.0021 | 0.0077 |
| pos_301 | Hex1Cer(d16:1/22:0) | pos | C44 H86 O8 N1    | 0.9915 | 1.0899 | 0.0004 | 0.0029 |
| pos_302 | Hex1Cer(d18:1/22:0) | pos | C46 H90 O8 N1    | 1.2986 | 1.1536 | 0.0148 | 0.0302 |
| pos_305 | Hex1Cer(d17:1/24:1) | pos | C47 H88 O7 N1    | 1.0749 | 1.1458 | 0.0142 | 0.0293 |
| pos_322 | LPC(14:0e)          | pos | C22 H49 O6 N1 P1 | 1.0781 | 1.1081 | 0.0016 | 0.0064 |
| pos_326 | LPC(16:0e)          | pos | C24 H53 O6 N1 P1 | 1.1760 | 1.1079 | 0.0006 | 0.0036 |
| pos_328 | LPC(16:1e)          | pos | C24 H51 O6 N1 P1 | 1.1041 | 1.1137 | 0.0012 | 0.0053 |
| pos_329 | LPC(16:2e)          | pos | C24 H49 O6 N1 P1 | 1.1000 | 1.1631 | 0.0080 | 0.0194 |
| pos_330 | LPC(17:0)           | pos | C25 H53 O7 N1 P1 | 1.1740 | 1.1306 | 0.0016 | 0.0064 |
| pos_333 | LPC(18:0e)          | pos | C26 H57 O6 N1 P1 | 1.4129 | 1.1920 | 0.0005 | 0.0034 |
| pos_335 | LPC(18:1e)          | pos | C26 H55 O6 N1 P1 | 1.2383 | 1.1234 | 0.0006 | 0.0035 |
| pos_337 | LPC(18:2e)          | pos | C26 H53 O6 N1 P1 | 1.0980 | 1.1249 | 0.0060 | 0.0155 |
| pos_341 | LPC(19:0)           | pos | C27 H57 O7 N1 P1 | 1.1694 | 1.1603 | 0.0033 | 0.0102 |
| pos_343 | LPC(20:0)           | pos | C28 H59 O7 N1 P1 | 0.9994 | 1.1042 | 0.0042 | 0.0121 |
| pos_344 | LPC(20:0e)          | pos | C28 H61 O6 N1 P1 | 1.4493 | 1.1894 | 0.0001 | 0.0024 |
| pos_346 | LPC(20:1e)          | pos | C28 H59 O6 N1 P1 | 1.2198 | 1.1511 | 0.0005 | 0.0035 |
| pos_350 | LPC(20:3e)          | pos | C28 H55 O6 N1 P1 | 1.2435 | 1.1989 | 0.0033 | 0.0101 |
| pos_352 | LPC(20:4e)          | pos | C28 H53 O6 N1 P1 | 1.1913 | 1.1609 | 0.0012 | 0.0053 |
| pos_355 | LPC(22:0)           | pos | C30 H63 O7 N1 P1 | 1.3982 | 1.2193 | 0.0010 | 0.0047 |

|         |                  |     |                      |        |        |        |        |
|---------|------------------|-----|----------------------|--------|--------|--------|--------|
| pos_362 | LPC(23:0)        | pos | C31 H65 O7 N1 P1     | 1.3661 | 1.2375 | 0.0042 | 0.0122 |
| pos_363 | LPC(23:1)        | pos | C31 H63 O7 N1 P1     | 1.4193 | 1.2342 | 0.0003 | 0.0028 |
| pos_364 | LPC(24:0)        | pos | C32 H67 O7 N1 P1     | 1.4700 | 1.2367 | 0.0018 | 0.0069 |
| pos_366 | LPC(24:2)        | pos | C32 H63 O7 N1 P1     | 1.1468 | 1.1609 | 0.0017 | 0.0066 |
| pos_367 | LPC(26:1)        | pos | C34 H69 O7 N1 P1     | 1.3210 | 1.1951 | 0.0026 | 0.0088 |
| pos_368 | LPC(28:0)        | pos | C36 H75 O7 N1 P1     | 0.9583 | 1.0752 | 0.0004 | 0.0031 |
| pos_369 | LPC(28:1)        | pos | C36 H73 O7 N1 P1     | 0.9028 | 1.0883 | 0.0083 | 0.0199 |
| pos_370 | LPC(30:0)        | pos | C38 H78 O7 N1 P1 Na1 | 1.1064 | 1.1029 | 0.0002 | 0.0024 |
| pos_371 | LPC(30:1)        | pos | C38 H76 O7 N1 P1 Na1 | 0.8939 | 1.0941 | 0.0125 | 0.0269 |
| pos_373 | LPC(32:0)        | pos | C40 H82 O7 N1 P1 Na1 | 1.1635 | 1.1146 | 0.0002 | 0.0025 |
| pos_374 | LPC(32:1)        | pos | C40 H80 O7 N1 P1 Na1 | 1.1827 | 1.1150 | 0.0001 | 0.0024 |
| pos_375 | LPC(33:1)        | pos | C41 H82 O7 N1 P1 Na1 | 1.2936 | 1.1598 | 0.0014 | 0.0058 |
| pos_376 | LPC(34:1)        | pos | C42 H84 O7 N1 P1 Na1 | 1.1907 | 1.1091 | 0.0001 | 0.0024 |
| pos_394 | MePC(8:0/11:2)   | pos | C28 H52 O8 N1 P1 Na1 | 1.2862 | 1.2040 | 0.0121 | 0.0262 |
| pos_396 | MePC(8:0e/11:4)  | pos | C28 H50 O7 N1 P1 Na1 | 1.1469 | 1.1790 | 0.0235 | 0.0429 |
| pos_400 | MePC(11:0/18:2)  | pos | C40 H80 O8 N2 P1     | 1.5295 | 1.2773 | 0.0003 | 0.0028 |
| pos_401 | MePC(18:0e/11:4) | pos | C40 H78 O7 N2 P1     | 1.4179 | 1.2651 | 0.0016 | 0.0065 |
| pos_402 | MePC(12:0/18:2)  | pos | C41 H82 O8 N2 P1     | 1.4962 | 1.3163 | 0.0011 | 0.0052 |
| pos_405 | MePC(11:0/20:2)  | pos | C42 H84 O8 N2 P1     | 1.5468 | 1.2492 | 0.0004 | 0.0030 |
| pos_406 | MePC(11:0/20:3)  | pos | C42 H82 O8 N2 P1     | 1.6363 | 1.3397 | 0.0004 | 0.0031 |
| pos_407 | MePC(11:0/20:4)  | pos | C42 H80 O8 N2 P1     | 1.3141 | 1.2035 | 0.0004 | 0.0029 |
| pos_408 | MePC(20:0e/11:4) | pos | C42 H82 O7 N2 P1     | 1.8398 | 1.4502 | 0.0002 | 0.0026 |
| pos_409 | MePC(16:0/16:1)  | pos | C41 H84 O8 N2 P1     | 1.0318 | 1.0785 | 0.0002 | 0.0026 |

# Supplementary Material

|         |                  |     |                      |        |          |        |        |
|---------|------------------|-----|----------------------|--------|----------|--------|--------|
| pos_410 | MePC(16:1/16:1)  | pos | C43 H86 O8 N2 P1     | 1.5864 | 1.3555   | 0.0010 | 0.0048 |
| pos_418 | MePC(15:0/18:2)  | pos | C42 H84 O8 N2 P1     | 1.5010 | 1.2291   | 0.0006 | 0.0036 |
| pos_419 | MePC(15:0/18:3)  | pos | C42 H82 O8 N2 P1     | 1.6366 | 1.3390   | 0.0004 | 0.0031 |
| pos_420 | MePC(20:4e/13:0) | pos | C42 H82 O7 N2 P1     | 1.8391 | 1.5054   | 0.0007 | 0.0039 |
| pos_421 | MePC(11:0/22:5)  | pos | C44 H82 O8 N2 P1     | 1.3529 | 1.2136   | 0.0010 | 0.0048 |
| pos_424 | MePC(16:1/18:2)  | pos | C45 H88 O8 N2 P1     | 1.8620 | 1.8662   | 0.0233 | 0.0427 |
| pos_437 | MePC(17:1/18:2)  | pos | C46 H90 O8 N2 P1     | 1.5374 | 1.3042   | 0.0004 | 0.0032 |
| pos_438 | MePC(15:0/20:5)  | pos | C44 H82 O8 N2 P1     | 1.3529 | 1.2135   | 0.0010 | 0.0048 |
| pos_440 | MePC(18:1/18:2)  | pos | C45 H84 O8 N1 P1 Na1 | 0.9987 | 1.0898   | 0.0039 | 0.0115 |
| pos_442 | MePC(16:0e/20:4) | pos | C45 H84 O7 N1 P1 Na1 | 3.7678 | 110.2739 | 0.0000 | 0.0000 |
| pos_450 | MePC(19:0/18:2)  | pos | C46 H88 O8 N1 P1 Na1 | 0.9955 | 1.0814   | 0.0033 | 0.0101 |
| pos_451 | MePC(19:1/18:2)  | pos | C48 H94 O8 N2 P1     | 1.6468 | 1.3055   | 0.0004 | 0.0032 |
| pos_457 | MePC(16:0e/22:6) | pos | C47 H84 O7 N1 P1 Na1 | 0.8828 | 1.1027   | 0.0255 | 0.0456 |
| pos_463 | MePC(17:0/22:6)  | pos | C50 H92 O8 N2 P1     | 1.1594 | 1.1619   | 0.0043 | 0.0124 |
| pos_470 | MePC(20:4e/21:0) | pos | C50 H94 O7 N1 P1 Na1 | 1.1138 | 1.1176   | 0.0003 | 0.0029 |
| pos_486 | PC(6:0/14:3)     | pos | C28 H51 O8 N1 P1     | 1.1018 | 1.1693   | 0.0163 | 0.0324 |
| pos_487 | PC(8:0e/13:0)    | pos | C29 H61 O7 N1 P1     | 1.4415 | 1.1871   | 0.0253 | 0.0453 |
| pos_489 | PC(10:0e/11:3)   | pos | C29 H55 O7 N1 P1     | 1.2110 | 1.1423   | 0.0009 | 0.0045 |
| pos_495 | PC(8:1e/15:0)    | pos | C31 H63 O7 N1 P1     | 1.4193 | 1.2342   | 0.0003 | 0.0028 |
| pos_496 | PC(12:0e/11:4)   | pos | C31 H57 O7 N1 P1     | 0.9616 | 1.0959   | 0.0106 | 0.0237 |
| pos_497 | PC(12:1e/11:4)   | pos | C31 H55 O7 N1 P1     | 0.8837 | 1.0743   | 0.0095 | 0.0219 |
| pos_498 | PC(12:0e/12:0)   | pos | C32 H67 O7 N1 P1     | 1.4700 | 1.2367   | 0.0018 | 0.0069 |
| pos_500 | PC(8:1e/18:2)    | pos | C34 H65 O7 N1 P1     | 1.2522 | 1.2023   | 0.0035 | 0.0106 |

|         |                |     |                      |        |        |        |        |
|---------|----------------|-----|----------------------|--------|--------|--------|--------|
| pos_501 | PC(11:0/16:0)  | pos | C35 H71 O8 N1 P1     | 1.2365 | 1.1850 | 0.0005 | 0.0032 |
| pos_504 | PC(14:0/14:0)  | pos | C36 H72 O8 N1 P1 Na1 | 1.4471 | 1.2115 | 0.0016 | 0.0063 |
| pos_506 | PC(16:0/13:0)  | pos | C37 H75 O8 N1 P1     | 1.6099 | 1.2255 | 0.0000 | 0.0006 |
| pos_508 | PC(8:0e/21:0)  | pos | C37 H77 O7 N1 P1     | 1.2628 | 1.1473 | 0.0009 | 0.0045 |
| pos_509 | PC(16:1/13:0)  | pos | C37 H73 O8 N1 P1     | 1.3231 | 1.2409 | 0.0016 | 0.0063 |
| pos_510 | PC(8:1e/21:0)  | pos | C37 H75 O7 N1 P1     | 1.0078 | 1.0997 | 0.0037 | 0.0110 |
| pos_513 | PC(14:0e/16:0) | pos | C38 H79 O7 N1 P1     | 1.0002 | 1.0700 | 0.0001 | 0.0023 |
| pos_514 | PC(16:1/14:0)  | pos | C38 H74 O8 N1 P1 Na1 | 1.2876 | 1.1569 | 0.0006 | 0.0035 |
| pos_516 | PC(12:0e/18:1) | pos | C38 H77 O7 N1 P1     | 1.1047 | 1.1075 | 0.0019 | 0.0071 |
| pos_520 | PC(14:1e/16:1) | pos | C38 H75 O7 N1 P1     | 1.1740 | 1.1410 | 0.0024 | 0.0082 |
| pos_522 | PC(8:0/22:3)   | pos | C38 H71 O8 N1 P1     | 1.4471 | 1.2115 | 0.0016 | 0.0063 |
| pos_523 | PC(15:0/16:0)  | pos | C39 H79 O8 N1 P1     | 0.9821 | 1.0852 | 0.0006 | 0.0035 |
| pos_525 | PC(8:0e/23:0)  | pos | C39 H81 O7 N1 P1     | 1.0611 | 1.1145 | 0.0073 | 0.0181 |
| pos_526 | PC(15:0/16:1)  | pos | C39 H77 O8 N1 P1     | 0.9898 | 1.1231 | 0.0237 | 0.0431 |
| pos_528 | PC(14:0e/17:1) | pos | C39 H79 O7 N1 P1     | 1.2282 | 1.0942 | 0.0000 | 0.0010 |
| pos_533 | PC(20:5/11:4)  | pos | C39 H61 O8 N1 P1     | 1.4677 | 1.2127 | 0.0005 | 0.0032 |
| pos_534 | PC(16:0/16:0)  | pos | C40 H81 O8 N1 P1     | 1.1065 | 1.1065 | 0.0001 | 0.0023 |
| pos_536 | PC(16:0/16:1)  | pos | C40 H78 O8 N1 P1 Na1 | 1.0024 | 1.0924 | 0.0053 | 0.0141 |
| pos_538 | PC(14:0e/18:1) | pos | C40 H81 O7 N1 P1     | 0.9895 | 1.0850 | 0.0024 | 0.0084 |
| pos_542 | PC(16:1e/16:1) | pos | C40 H79 O7 N1 P1     | 0.9668 | 1.0735 | 0.0003 | 0.0027 |
| pos_543 | PC(10:0/22:3)  | pos | C40 H75 O8 N1 P1     | 1.1673 | 1.1487 | 0.0045 | 0.0128 |
| pos_544 | PC(14:1e/18:2) | pos | C40 H77 O7 N1 P1     | 0.9828 | 1.1159 | 0.0473 | 0.0758 |
| pos_550 | PC(18:0/15:0)  | pos | C41 H83 O8 N1 P1     | 1.0247 | 1.0868 | 0.0003 | 0.0028 |

# Supplementary Material

|         |                |     |                      |        |        |        |        |
|---------|----------------|-----|----------------------|--------|--------|--------|--------|
| pos_551 | PC(16:0/17:0)  | pos | C41 H83 O8 N1 P1     | 1.1261 | 1.0924 | 0.0001 | 0.0023 |
| pos_554 | PC(17:1/16:0)  | pos | C41 H80 O8 N1 P1 Na1 | 1.3211 | 1.1436 | 0.0002 | 0.0026 |
| pos_556 | PC(16:0e/17:1) | pos | C41 H83 O7 N1 P1     | 1.0252 | 1.0788 | 0.0002 | 0.0026 |
| pos_557 | PC(15:0/18:2)  | pos | C41 H79 O8 N1 P1     | 1.0541 | 1.0912 | 0.0008 | 0.0044 |
| pos_558 | PC(16:2e/17:0) | pos | C41 H81 O7 N1 P1     | 1.0853 | 1.1436 | 0.0485 | 0.0774 |
| pos_559 | PC(15:0/18:3)  | pos | C41 H77 O8 N1 P1     | 1.0983 | 1.1574 | 0.0192 | 0.0361 |
| pos_567 | PC(18:0e/16:0) | pos | C42 H87 O7 N1 P1     | 1.0108 | 1.0906 | 0.0006 | 0.0035 |
| pos_569 | PC(16:1e/18:0) | pos | C42 H85 O7 N1 P1     | 1.0385 | 1.0714 | 0.0001 | 0.0024 |
| pos_572 | PC(16:0/18:2)  | pos | C42 H80 O8 N1 P1 Na1 | 1.0950 | 1.1056 | 0.0027 | 0.0089 |
| pos_573 | PC(16:0e/18:2) | pos | C42 H83 O7 N1 P1     | 1.1910 | 1.1080 | 0.0001 | 0.0024 |
| pos_574 | PC(16:1e/18:1) | pos | C42 H83 O7 N1 P1     | 0.9412 | 1.0670 | 0.0008 | 0.0043 |
| pos_576 | PC(16:0/18:3)  | pos | C42 H78 O8 N1 P1 Na1 | 1.1402 | 1.1127 | 0.0003 | 0.0029 |
| pos_578 | PC(16:1e/18:2) | pos | C42 H81 O7 N1 P1     | 0.9808 | 1.0775 | 0.0003 | 0.0028 |
| pos_579 | PC(16:1/18:3)  | pos | C42 H77 O8 N1 P1     | 0.9292 | 1.1364 | 0.0251 | 0.0452 |
| pos_581 | PC(14:0e/20:4) | pos | C42 H79 O7 N1 P1     | 0.8951 | 1.0624 | 0.0008 | 0.0043 |
| pos_583 | PC(14:0/20:5)  | pos | C42 H74 O8 N1 P1 Na1 | 0.9051 | 1.0962 | 0.0104 | 0.0234 |
| pos_591 | PC(18:0/17:0)  | pos | C43 H87 O8 N1 P1     | 0.9473 | 1.0704 | 0.0008 | 0.0044 |
| pos_595 | PC(17:0/18:2)  | pos | C43 H83 O8 N1 P1     | 1.0324 | 1.1310 | 0.0421 | 0.0687 |
| pos_596 | PC(16:2e/19:0) | pos | C43 H85 O7 N1 P1     | 1.3405 | 1.1119 | 0.0165 | 0.0327 |
| pos_599 | PC(16:2e/19:1) | pos | C43 H83 O7 N1 P1     | 1.0589 | 1.0946 | 0.0004 | 0.0032 |
| pos_602 | PC(20:4e/15:0) | pos | C43 H81 O7 N1 P1     | 0.9707 | 1.0867 | 0.0014 | 0.0058 |
| pos_605 | PC(20:0/16:0)  | pos | C44 H89 O8 N1 P1     | 1.3234 | 1.2046 | 0.0030 | 0.0095 |
| pos_606 | PC(18:0/18:0)  | pos | C44 H89 O8 N1 P1     | 1.1183 | 1.1363 | 0.0144 | 0.0295 |



---

|         |                |     |                      |        |        |        |        |
|---------|----------------|-----|----------------------|--------|--------|--------|--------|
| pos_607 | PC(18:0/18:1)  | pos | C44 H87 O8 N1 P1     | 1.1332 | 1.1331 | 0.0045 | 0.0128 |
| pos_608 | PC(16:0/20:1)  | pos | C44 H87 O8 N1 P1     | 1.3833 | 1.1710 | 0.0165 | 0.0327 |
| pos_609 | PC(18:0e/18:1) | pos | C44 H89 O7 N1 P1     | 1.1295 | 1.1124 | 0.0007 | 0.0038 |
| pos_610 | PC(18:1/18:1)  | pos | C44 H84 O8 N1 P1 Na1 | 1.0188 | 1.0755 | 0.0007 | 0.0041 |
| pos_612 | PC(18:0e/18:2) | pos | C44 H87 O7 N1 P1     | 1.1029 | 1.0912 | 0.0005 | 0.0032 |
| pos_613 | PC(16:0e/20:2) | pos | C44 H86 O7 N1 P1 Na1 | 0.9181 | 1.0748 | 0.0003 | 0.0028 |
| pos_614 | PC(18:1/18:2)  | pos | C44 H83 O8 N1 P1     | 1.5661 | 1.3010 | 0.0026 | 0.0088 |
| pos_615 | PC(16:0/20:3)  | pos | C44 H83 O8 N1 P1     | 1.6241 | 1.2868 | 0.0002 | 0.0024 |
| pos_616 | PC(18:3e/18:0) | pos | C44 H85 O7 N1 P1     | 0.9077 | 1.0761 | 0.0010 | 0.0047 |
| pos_617 | PC(18:1e/18:2) | pos | C44 H85 O7 N1 P1     | 1.0835 | 1.0897 | 0.0002 | 0.0024 |
| pos_619 | PC(18:4/18:0)  | pos | C44 H81 O8 N1 P1     | 1.0658 | 1.0870 | 0.0032 | 0.0099 |
| pos_620 | PC(16:0e/20:4) | pos | C44 H83 O7 N1 P1     | 1.2538 | 1.1514 | 0.0011 | 0.0052 |
| pos_621 | PC(16:2e/20:2) | pos | C44 H82 O7 N1 P1 Na1 | 1.0677 | 1.0879 | 0.0003 | 0.0029 |
| pos_622 | PC(16:1/20:4)  | pos | C44 H79 O8 N1 P1     | 1.4743 | 1.2493 | 0.0010 | 0.0048 |
| pos_623 | PC(16:0/20:5)  | pos | C44 H78 O8 N1 P1 Na1 | 1.0881 | 1.0943 | 0.0022 | 0.0077 |
| pos_624 | PC(16:1e/20:4) | pos | C44 H81 O7 N1 P1     | 1.9209 | 1.5157 | 0.0001 | 0.0023 |
| pos_625 | PC(16:2e/20:3) | pos | C44 H80 O7 N1 P1 Na1 | 0.9983 | 1.0842 | 0.0016 | 0.0065 |
| pos_628 | PC(16:1/20:5)  | pos | C44 H77 O8 N1 P1     | 1.5244 | 1.2935 | 0.0149 | 0.0303 |
| pos_629 | PC(14:0/22:6)  | pos | C44 H76 O8 N1 P1 Na1 | 1.0064 | 1.0963 | 0.0037 | 0.0111 |
| pos_636 | PC(16:0/21:0)  | pos | C45 H91 O8 N1 P1     | 1.0687 | 1.1099 | 0.0120 | 0.0262 |
| pos_639 | PC(19:1/18:2)  | pos | C45 H85 O8 N1 P1     | 1.0198 | 1.0789 | 0.0003 | 0.0027 |
| pos_642 | PC(17:0/20:4)  | pos | C45 H83 O8 N1 P1     | 1.7642 | 1.4424 | 0.0062 | 0.0158 |
| pos_643 | PC(19:1/18:3)  | pos | C45 H83 O8 N1 P1     | 1.2311 | 1.1243 | 0.0002 | 0.0024 |

---

# Supplementary Material

|         |                |     |                      |        |        |        |        |
|---------|----------------|-----|----------------------|--------|--------|--------|--------|
| pos_646 | PC(17:1/20:4)  | pos | C45 H81 O8 N1 P1     | 1.3557 | 1.2687 | 0.0071 | 0.0176 |
| pos_648 | PC(17:0/20:5)  | pos | C45 H80 O8 N1 P1 Na1 | 1.1316 | 1.1266 | 0.0006 | 0.0038 |
| pos_650 | PC(15:0/22:6)  | pos | C45 H79 O8 N1 P1     | 1.0725 | 1.1790 | 0.0097 | 0.0223 |
| pos_655 | PC(20:0e/18:1) | pos | C46 H93 O7 N1 P1     | 0.9638 | 1.0903 | 0.0014 | 0.0059 |
| pos_659 | PC(20:1/18:2)  | pos | C46 H87 O8 N1 P1     | 1.6698 | 1.5103 | 0.0102 | 0.0232 |
| pos_662 | PC(16:0/22:4)  | pos | C46 H84 O8 N1 P1 Na1 | 1.1790 | 1.1188 | 0.0004 | 0.0031 |
| pos_663 | PC(16:0e/22:4) | pos | C46 H87 O7 N1 P1     | 1.1631 | 1.1013 | 0.0001 | 0.0024 |
| pos_664 | PC(18:2e/20:2) | pos | C46 H86 O7 N1 P1 Na1 | 1.1715 | 1.1215 | 0.0012 | 0.0053 |
| pos_665 | PC(18:0e/20:4) | pos | C46 H87 O7 N1 P1     | 1.0437 | 1.0986 | 0.0008 | 0.0043 |
| pos_666 | PC(18:1/20:4)  | pos | C46 H83 O8 N1 P1     | 1.4464 | 1.2201 | 0.0025 | 0.0085 |
| pos_668 | PC(18:0/20:5)  | pos | C46 H82 O8 N1 P1 Na1 | 1.1485 | 1.1079 | 0.0003 | 0.0028 |
| pos_669 | PC(16:2e/22:3) | pos | C46 H84 O7 N1 P1 Na1 | 1.0225 | 1.0880 | 0.0012 | 0.0055 |
| pos_670 | PC(18:2e/20:3) | pos | C46 H84 O7 N1 P1 Na1 | 1.2231 | 1.1329 | 0.0007 | 0.0038 |
| pos_671 | PC(16:0e/22:5) | pos | C46 H84 O7 N1 P1 Na1 | 0.9763 | 1.1070 | 0.0123 | 0.0266 |
| pos_673 | PC(16:0/22:6)  | pos | C46 H81 O8 N1 P1     | 1.0837 | 1.1799 | 0.0370 | 0.0621 |
| pos_676 | PC(16:2e/22:4) | pos | C46 H82 O7 N1 P1 Na1 | 1.2057 | 1.1304 | 0.0005 | 0.0034 |
| pos_689 | PC(17:0/22:3)  | pos | C47 H89 O8 N1 P1     | 1.0955 | 1.0947 | 0.0003 | 0.0027 |
| pos_690 | PC(19:1/20:2)  | pos | C47 H89 O8 N1 P1     | 1.0768 | 1.1078 | 0.0006 | 0.0038 |
| pos_691 | PC(19:0/20:4)  | pos | C47 H87 O8 N1 P1     | 1.0164 | 1.0800 | 0.0003 | 0.0028 |
| pos_692 | PC(19:1/20:3)  | pos | C47 H87 O8 N1 P1     | 1.3225 | 1.1434 | 0.0001 | 0.0024 |
| pos_695 | PC(17:1/22:4)  | pos | C47 H84 O8 N1 P1 Na1 | 1.7696 | 1.1716 | 0.0013 | 0.0056 |
| pos_698 | PC(17:0/22:6)  | pos | C47 H83 O8 N1 P1     | 1.4075 | 1.2936 | 0.0014 | 0.0060 |
| pos_709 | PC(20:0e/20:4) | pos | C48 H91 O7 N1 P1     | 1.1959 | 1.1183 | 0.0002 | 0.0026 |

|         |                |     |                      |        |        |        |        |
|---------|----------------|-----|----------------------|--------|--------|--------|--------|
| pos_710 | PC(20:2e/20:2) | pos | C48 H90 O7 N1 P1 Na1 | 1.3516 | 1.1748 | 0.0003 | 0.0027 |
| pos_711 | PC(20:1/20:4)  | pos | C48 H87 O8 N1 P1     | 1.5324 | 1.2648 | 0.0005 | 0.0034 |
| pos_714 | PC(18:3e/22:2) | pos | C48 H88 O7 N1 P1 Na1 | 1.0674 | 1.1233 | 0.0010 | 0.0048 |
| pos_717 | PC(18:0/22:6)  | pos | C48 H85 O8 N1 P1     | 1.7016 | 1.3686 | 0.0010 | 0.0046 |
| pos_718 | PC(18:1/22:5)  | pos | C48 H85 O8 N1 P1     | 0.8902 | 1.0741 | 0.0026 | 0.0088 |
| pos_719 | PC(18:0e/22:6) | pos | C48 H87 O7 N1 P1     | 1.0161 | 1.0869 | 0.0007 | 0.0039 |
| pos_720 | PC(18:2e/22:4) | pos | C48 H86 O7 N1 P1 Na1 | 1.3081 | 1.1395 | 0.0001 | 0.0024 |
| pos_721 | PC(18:1/22:6)  | pos | C48 H83 O8 N1 P1     | 1.8297 | 1.4277 | 0.0002 | 0.0025 |
| pos_722 | PC(18:3e/22:4) | pos | C48 H84 O7 N1 P1 Na1 | 1.0361 | 1.0923 | 0.0009 | 0.0045 |
| pos_724 | PC(18:2/22:6)  | pos | C48 H81 O8 N1 P1     | 1.2369 | 1.2240 | 0.0084 | 0.0201 |
| pos_728 | PC(18:3e/22:5) | pos | C48 H82 O7 N1 P1 Na1 | 1.0163 | 1.1197 | 0.0088 | 0.0207 |
| pos_733 | PC(17:1/24:2)  | pos | C49 H93 O8 N1 P1     | 1.3278 | 1.1655 | 0.0151 | 0.0305 |
| pos_745 | PC(20:0/22:4)  | pos | C50 H93 O8 N1 P1     | 1.1474 | 1.1300 | 0.0005 | 0.0033 |
| pos_747 | PC(20:0/22:5)  | pos | C50 H91 O8 N1 P1     | 1.1865 | 1.1089 | 0.0002 | 0.0024 |
| pos_748 | PC(31:1/11:4)  | pos | C50 H91 O8 N1 P1     | 1.1135 | 1.1276 | 0.0030 | 0.0096 |
| pos_751 | PC(20:0e/22:6) | pos | C50 H91 O7 N1 P1     | 1.0891 | 1.1362 | 0.0055 | 0.0145 |
| pos_752 | PC(20:2e/22:4) | pos | C50 H90 O7 N1 P1 Na1 | 1.1842 | 1.1331 | 0.0001 | 0.0024 |
| pos_760 | PC(20:3e/22:6) | pos | C50 H85 O7 N1 P1     | 1.3073 | 1.1392 | 0.0001 | 0.0024 |
| pos_761 | PC(22:6/21:0)  | pos | C51 H91 O8 N1 P1     | 1.0881 | 1.1292 | 0.0042 | 0.0121 |
| pos_762 | PC(22:6/21:1)  | pos | C51 H89 O8 N1 P1     | 1.4228 | 1.2500 | 0.0027 | 0.0089 |
| pos_766 | PC(24:0/20:4)  | pos | C52 H97 O8 N1 P1     | 2.3368 | 2.0186 | 0.0077 | 0.0189 |
| pos_768 | PC(20:3e/24:2) | pos | C52 H97 O7 N1 P1     | 1.0613 | 1.1467 | 0.0063 | 0.0160 |
| pos_769 | PC(22:0/22:6)  | pos | C52 H93 O8 N1 P1     | 1.5667 | 1.4193 | 0.0442 | 0.0712 |

# Supplementary Material

|         |                |     |                      |        |        |        |        |
|---------|----------------|-----|----------------------|--------|--------|--------|--------|
| pos_770 | PC(20:4e/24:2) | pos | C52 H95 O7 N1 P1     | 1.2387 | 1.1733 | 0.0044 | 0.0127 |
| pos_771 | PC(22:1/22:6)  | pos | C52 H91 O8 N1 P1     | 1.1474 | 1.1291 | 0.0027 | 0.0090 |
| pos_774 | PC(24:1/22:6)  | pos | C54 H95 O8 N1 P1     | 1.2408 | 1.1458 | 0.0009 | 0.0045 |
| pos_788 | PE(16:1e/18:1) | pos | C39 H76 O7 N1 P1 Na1 | 1.0532 | 1.1244 | 0.0137 | 0.0288 |
| pos_798 | PE(18:0/18:1)  | pos | C41 H80 O8 N1 P1 Na1 | 1.0875 | 1.0872 | 0.0001 | 0.0023 |
| pos_812 | PE(18:0/20:4)  | pos | C43 H79 O8 N1 P1     | 1.0659 | 1.0851 | 0.0001 | 0.0024 |
| pos_872 | PG(16:1/14:0)  | pos | C36 H70 O10 N0 P1    | 1.4310 | 1.2746 | 0.0027 | 0.0089 |
| pos_911 | PS(18:0/18:1)  | pos | C42 H81 O10 N1 P1    | 1.9664 | 1.3601 | 0.0000 | 0.0008 |
| pos_914 | PS(18:0/22:5)  | pos | C46 H81 O10 N1 P1    | 1.6244 | 1.2534 | 0.0000 | 0.0017 |
| pos_915 | PS(18:0/22:6)  | pos | C46 H79 O10 N1 P1    | 1.3048 | 1.1662 | 0.0027 | 0.0089 |
| pos_920 | SM(d18:1/12:0) | pos | C35 H72 O6 N2 P1     | 1.1584 | 1.1192 | 0.0005 | 0.0034 |
| pos_921 | SM(d18:1/13:0) | pos | C36 H74 O6 N2 P1     | 1.1098 | 1.1155 | 0.0009 | 0.0045 |
| pos_923 | SM(d16:1/16:0) | pos | C37 H75 O6 N2 P1 Na1 | 1.0745 | 1.0909 | 0.0017 | 0.0067 |
| pos_924 | SM(d14:0/18:1) | pos | C37 H76 O6 N2 P1     | 1.1369 | 1.0889 | 0.0003 | 0.0028 |
| pos_925 | SM(d16:1/16:1) | pos | C37 H74 O6 N2 P1     | 1.2370 | 1.1407 | 0.0001 | 0.0024 |
| pos_926 | SM(d14:0/18:4) | pos | C37 H70 O6 N2 P1     | 1.1941 | 1.1623 | 0.0020 | 0.0074 |
| pos_928 | SM(d17:1/16:0) | pos | C38 H78 O6 N2 P1     | 1.0307 | 1.0856 | 0.0019 | 0.0071 |
| pos_930 | SM(d16:1/17:1) | pos | C38 H76 O6 N2 P1     | 1.0535 | 1.1391 | 0.0123 | 0.0265 |
| pos_931 | SM(d18:2/15:1) | pos | C38 H74 O6 N2 P1     | 1.1170 | 1.1484 | 0.0062 | 0.0158 |
| pos_934 | SM(d18:2/16:0) | pos | C39 H78 O6 N2 P1     | 1.1975 | 1.1147 | 0.0001 | 0.0024 |
| pos_936 | SM(d16:1/18:3) | pos | C39 H74 O6 N2 P1     | 1.0745 | 1.0909 | 0.0017 | 0.0067 |
| pos_939 | SM(d18:2/17:1) | pos | C40 H78 O6 N2 P1     | 1.0704 | 1.0960 | 0.0015 | 0.0061 |
| pos_940 | SM(d14:0/21:4) | pos | C40 H76 O6 N2 P1     | 1.1087 | 1.1073 | 0.0014 | 0.0060 |

---

|         |                |     |                      |        |        |        |        |
|---------|----------------|-----|----------------------|--------|--------|--------|--------|
| pos_941 | SM(d18:0/18:0) | pos | C41 H86 O6 N2 P1     | 1.1789 | 1.1227 | 0.0162 | 0.0324 |
| pos_944 | SM(d18:2/18:1) | pos | C41 H80 O6 N2 P1     | 1.2300 | 1.1563 | 0.0026 | 0.0088 |
| pos_945 | SM(d18:1/18:3) | pos | C41 H78 O6 N2 P1     | 1.0537 | 1.0780 | 0.0004 | 0.0031 |
| pos_946 | SM(d18:2/18:3) | pos | C41 H76 O6 N2 P1     | 1.4871 | 1.2150 | 0.0006 | 0.0035 |
| pos_948 | SM(d19:1/18:1) | pos | C42 H84 O6 N2 P1     | 1.0230 | 1.1117 | 0.0222 | 0.0408 |
| pos_949 | SM(d18:2/19:1) | pos | C42 H82 O6 N2 P1     | 1.2070 | 1.1037 | 0.0001 | 0.0024 |
| pos_950 | SM(d14:0/23:4) | pos | C42 H80 O6 N2 P1     | 1.2296 | 1.1404 | 0.0018 | 0.0069 |
| pos_951 | SM(d16:1/21:3) | pos | C42 H80 O6 N2 P1     | 1.4276 | 1.1821 | 0.0002 | 0.0024 |
| pos_952 | SM(d14:0/23:6) | pos | C42 H76 O6 N2 P1     | 1.0865 | 1.1119 | 0.0019 | 0.0070 |
| pos_953 | SM(d20:0/18:0) | pos | C43 H90 O6 N2 P1     | 1.3577 | 1.1722 | 0.0271 | 0.0480 |
| pos_954 | SM(d20:0/18:1) | pos | C43 H88 O6 N2 P1     | 1.5606 | 1.2053 | 0.0009 | 0.0044 |
| pos_955 | SM(d16:1/22:0) | pos | C43 H87 O6 N2 P1 Na1 | 1.2007 | 1.1030 | 0.0001 | 0.0023 |
| pos_957 | SM(d18:1/20:2) | pos | C43 H84 O6 N2 P1     | 1.0543 | 1.1078 | 0.0081 | 0.0196 |
| pos_958 | SM(d16:1/22:2) | pos | C43 H84 O6 N2 P1     | 1.1526 | 1.1122 | 0.0003 | 0.0029 |
| pos_962 | SM(d18:1/21:0) | pos | C44 H90 O6 N2 P1     | 0.9698 | 1.0740 | 0.0013 | 0.0055 |
| pos_963 | SM(d18:0/21:2) | pos | C44 H88 O6 N2 P1     | 1.0104 | 1.0844 | 0.0031 | 0.0098 |
| pos_965 | SM(d18:1/21:2) | pos | C44 H86 O6 N2 P1     | 1.0032 | 1.0953 | 0.0164 | 0.0326 |
| pos_966 | SM(d18:0/21:3) | pos | C44 H86 O6 N2 P1     | 1.2254 | 1.1095 | 0.0000 | 0.0020 |
| pos_968 | SM(d18:1/21:5) | pos | C44 H80 O6 N2 P1     | 1.4273 | 1.1652 | 0.0001 | 0.0023 |
| pos_971 | SM(d16:1/24:1) | pos | C45 H89 O6 N2 P1 Na1 | 1.1203 | 1.0883 | 0.0003 | 0.0027 |
| pos_973 | SM(d18:1/22:2) | pos | C45 H88 O6 N2 P1     | 0.9929 | 1.0790 | 0.0013 | 0.0056 |
| pos_974 | SM(d18:1/22:3) | pos | C45 H86 O6 N2 P1     | 1.1645 | 1.1372 | 0.0058 | 0.0152 |
| pos_975 | SM(d16:1/24:3) | pos | C45 H86 O6 N2 P1     | 1.2017 | 1.1031 | 0.0001 | 0.0023 |

---

## Supplementary Material

|          |                |     |                  |        |        |        |        |
|----------|----------------|-----|------------------|--------|--------|--------|--------|
| pos_977  | SM(d16:1/24:4) | pos | C45 H84 O6 N2 P1 | 1.0055 | 1.0878 | 0.0017 | 0.0066 |
| pos_978  | SM(d18:1/22:5) | pos | C45 H82 O6 N2 P1 | 2.0911 | 1.9676 | 0.0252 | 0.0453 |
| pos_979  | SM(d20:1/20:5) | pos | C45 H82 O6 N2 P1 | 1.6940 | 1.2855 | 0.0000 | 0.0015 |
| pos_980  | SM(d18:1/22:6) | pos | C45 H80 O6 N2 P1 | 1.3578 | 1.2078 | 0.0024 | 0.0082 |
| pos_982  | SM(d18:1/23:1) | pos | C46 H92 O6 N2 P1 | 1.0533 | 1.0863 | 0.0014 | 0.0058 |
| pos_983  | SM(d18:1/23:2) | pos | C46 H90 O6 N2 P1 | 1.0484 | 1.1044 | 0.0036 | 0.0108 |
| pos_984  | SM(d20:0/21:3) | pos | C46 H90 O6 N2 P1 | 1.1213 | 1.0951 | 0.0003 | 0.0028 |
| pos_985  | SM(d18:1/23:3) | pos | C46 H88 O6 N2 P1 | 1.1455 | 1.1168 | 0.0056 | 0.0148 |
| pos_986  | SM(d18:1/23:4) | pos | C46 H86 O6 N2 P1 | 1.4297 | 1.1843 | 0.0002 | 0.0025 |
| pos_987  | SM(d18:1/23:5) | pos | C46 H84 O6 N2 P1 | 1.7090 | 1.2502 | 0.0000 | 0.0003 |
| pos_989  | SM(d18:1/24:1) | pos | C47 H94 O6 N2 P1 | 1.3069 | 1.1651 | 0.0057 | 0.0150 |
| pos_990  | SM(d18:1/24:2) | pos | C47 H92 O6 N2 P1 | 1.0562 | 1.0856 | 0.0006 | 0.0036 |
| pos_991  | SM(d18:1/24:3) | pos | C47 H90 O6 N2 P1 | 1.2318 | 1.1347 | 0.0008 | 0.0043 |
| pos_992  | SM(d19:1/23:3) | pos | C47 H90 O6 N2 P1 | 0.9751 | 1.0700 | 0.0001 | 0.0024 |
| pos_993  | SM(d18:2/24:3) | pos | C47 H88 O6 N2 P1 | 1.1136 | 1.0874 | 0.0003 | 0.0028 |
| pos_994  | SM(d18:1/24:5) | pos | C47 H86 O6 N2 P1 | 0.9729 | 1.0875 | 0.0021 | 0.0075 |
| pos_995  | SM(d19:0/24:2) | pos | C48 H96 O6 N2 P1 | 1.0724 | 1.1669 | 0.0224 | 0.0411 |
| pos_997  | SM(d19:0/24:4) | pos | C48 H92 O6 N2 P1 | 1.0360 | 1.0840 | 0.0014 | 0.0058 |
| pos_998  | SM(d19:0/24:5) | pos | C48 H90 O6 N2 P1 | 0.9939 | 1.1055 | 0.0106 | 0.0237 |
| pos_999  | SM(d19:0/24:6) | pos | C48 H88 O6 N2 P1 | 1.0126 | 1.1448 | 0.0395 | 0.0654 |
| pos_1000 | SM(d19:1/24:6) | pos | C48 H86 O6 N2 P1 | 1.6526 | 1.2434 | 0.0000 | 0.0020 |
| pos_1001 | SM(d20:0/24:2) | pos | C49 H98 O6 N2 P1 | 1.4094 | 1.1293 | 0.0022 | 0.0077 |
| pos_1002 | SM(d20:0/24:3) | pos | C49 H96 O6 N2 P1 | 1.3556 | 1.1538 | 0.0093 | 0.0214 |

|          |                     |     |                      |        |        |        |        |
|----------|---------------------|-----|----------------------|--------|--------|--------|--------|
| pos_1005 | SM(d20:0/24:5)      | pos | C49 H92 O6 N2 P1     | 1.2611 | 1.1604 | 0.0080 | 0.0195 |
| pos_1006 | SM(d20:0/24:6)      | pos | C49 H90 O6 N2 P1     | 1.2005 | 1.1225 | 0.0002 | 0.0024 |
| pos_1007 | SM(t18:0/14:0)      | pos | C37 H78 O7 N2 P1     | 1.2514 | 1.1770 | 0.0021 | 0.0077 |
| pos_1008 | SM(t18:1/14:0)      | pos | C37 H76 O7 N2 P1     | 1.3310 | 1.1970 | 0.0033 | 0.0101 |
| pos_1009 | SM(t18:0/16:0)      | pos | C39 H82 O7 N2 P1     | 1.2591 | 1.1612 | 0.0012 | 0.0053 |
| pos_1010 | SM(t18:1/21:5)      | pos | C44 H80 O7 N2 P1     | 1.2460 | 1.2458 | 0.0387 | 0.0644 |
| pos_1011 | SM(t18:1/22:0)      | pos | C45 H92 O7 N2 P1     | 1.1512 | 1.1385 | 0.0031 | 0.0098 |
| pos_1012 | SM(t18:1/22:1)      | pos | C45 H90 O7 N2 P1     | 1.5371 | 1.3037 | 0.0002 | 0.0026 |
| pos_1013 | SM(t18:1/22:2)      | pos | C45 H88 O7 N2 P1     | 2.7685 | 5.8097 | 0.0006 | 0.0035 |
| pos_1014 | SM(t18:1/22:3)      | pos | C45 H86 O7 N2 P1     | 0.9706 | 1.0806 | 0.0028 | 0.0092 |
| pos_1015 | SM(t18:1/22:6)      | pos | C45 H79 O7 N2 P1 Li1 | 1.9247 | 1.4552 | 0.0000 | 0.0021 |
| pos_1017 | SM(t18:1/24:0)      | pos | C47 H96 O7 N2 P1     | 0.8792 | 1.1053 | 0.0365 | 0.0614 |
| pos_1027 | SPHP(d20:0)         | pos | C20 H43 O4 N1 P1     | 1.0150 | 1.0992 | 0.0015 | 0.0061 |
| pos_1028 | StE(22:3)           | pos | C51 H88 O2 N1        | 1.4476 | 1.2451 | 0.0025 | 0.0085 |
| pos_1029 | StE(22:4)           | pos | C51 H86 O2 N1        | 1.6211 | 1.2802 | 0.0007 | 0.0038 |
| pos_1067 | TG(14:0/10:2/14:0)  | pos | C41 H74 O6 Li1       | 1.7904 | 1.3122 | 0.0002 | 0.0025 |
| pos_1083 | TG(18:3/10:3/11:4)  | pos | C42 H60 O6 Li1       | 1.1797 | 1.2079 | 0.0202 | 0.0378 |
| pos_1095 | TG(16:0/6:0/18:2)   | pos | C43 H78 O6 Li1       | 1.6430 | 1.2817 | 0.0007 | 0.0038 |
| pos_1105 | TG(20:3/10:3/11:4)  | pos | C44 H64 O6 Li1       | 1.2303 | 1.2002 | 0.0119 | 0.0260 |
| pos_1106 | TG(20:4/10:4/11:3)  | pos | C44 H62 O6 Li1       | 1.4310 | 1.2746 | 0.0027 | 0.0089 |
| pos_1119 | TG(20:4e/6:0/16:0)  | pos | C45 H81 O5           | 1.4371 | 1.1421 | 0.0046 | 0.0130 |
| pos_1178 | TG(16:0e/14:0/16:0) | pos | C49 H100 O5 N1       | 1.4566 | 1.2142 | 0.0006 | 0.0035 |
| pos_1179 | TG(16:0/14:0/16:1)  | pos | C49 H92 O6 Na1       | 0.9637 | 1.0812 | 0.0038 | 0.0113 |

# Supplementary Material

|          |                     |     |                 |        |        |        |        |
|----------|---------------------|-----|-----------------|--------|--------|--------|--------|
| pos_1198 | TG(16:0/14:0/17:1)  | pos | C50 H94 O6 Na1  | 1.0864 | 1.1045 | 0.0030 | 0.0095 |
| pos_1200 | TG(16:1/14:0/17:1)  | pos | C50 H92 O6 Na1  | 1.0668 | 1.1219 | 0.0050 | 0.0135 |
| pos_1210 | TG(16:0/11:3/20:2)  | pos | C50 H86 O6 Li1  | 2.1702 | 1.3409 | 0.0000 | 0.0000 |
| pos_1218 | TG(18:0e/14:0/16:0) | pos | C51 H104 O5 N1  | 1.3639 | 1.1638 | 0.0002 | 0.0025 |
| pos_1220 | TG(16:0/16:0/16:1)  | pos | C51 H96 O6 Na1  | 1.1052 | 1.0995 | 0.0008 | 0.0041 |
| pos_1222 | TG(16:1/14:0/18:1)  | pos | C51 H94 O6 Na1  | 0.9825 | 1.1061 | 0.0269 | 0.0476 |
| pos_1224 | TG(16:0e/16:1/16:1) | pos | C51 H100 O5 N1  | 0.9826 | 1.1449 | 0.0368 | 0.0618 |
| pos_1246 | TG(16:0/16:0/17:0)  | pos | C52 H104 O6 N1  | 1.3460 | 1.1749 | 0.0006 | 0.0038 |
| pos_1249 | TG(15:0/16:0/18:1)  | pos | C52 H98 O6 Na1  | 1.0283 | 1.0872 | 0.0038 | 0.0114 |
| pos_1252 | TG(16:0/16:1/17:1)  | pos | C52 H96 O6 Na1  | 1.0310 | 1.0922 | 0.0041 | 0.0120 |
| pos_1254 | TG(16:1/16:1/17:1)  | pos | C52 H94 O6 Na1  | 0.9885 | 1.1211 | 0.0164 | 0.0326 |
| pos_1267 | TG(11:0/18:1/20:5)  | pos | C52 H88 O6 Li1  | 1.9083 | 1.2603 | 0.0000 | 0.0002 |
| pos_1281 | TG(16:1e/16:0/18:1) | pos | C53 H104 O5 N1  | 1.3785 | 1.1839 | 0.0018 | 0.0070 |
| pos_1282 | TG(18:1e/16:0/16:1) | pos | C53 H104 O5 N1  | 1.2697 | 1.1749 | 0.0028 | 0.0092 |
| pos_1294 | TG(18:4/16:0/16:1)  | pos | C53 H93 O6      | 0.9492 | 1.0849 | 0.0083 | 0.0199 |
| pos_1313 | TG(16:0/17:1/18:1)  | pos | C54 H100 O6 Na1 | 0.9843 | 1.0807 | 0.0025 | 0.0084 |
| pos_1315 | TG(16:1/17:1/18:1)  | pos | C54 H98 O6 Na1  | 1.0166 | 1.1107 | 0.0063 | 0.0160 |
| pos_1319 | TG(16:1/17:1/18:3)  | pos | C54 H94 O6 Li1  | 1.3169 | 1.1974 | 0.0067 | 0.0168 |
| pos_1333 | TG(18:0/16:0/18:0)  | pos | C55 H110 O6 N1  | 1.1397 | 1.1312 | 0.0043 | 0.0124 |
| pos_1334 | TG(18:0e/16:0/18:0) | pos | C55 H112 O5 N1  | 1.2790 | 1.1652 | 0.0012 | 0.0054 |
| pos_1339 | TG(18:0e/16:0/18:1) | pos | C55 H107 O5     | 1.0334 | 1.0892 | 0.0002 | 0.0026 |
| pos_1343 | TG(18:1e/16:0/18:1) | pos | C55 H108 O5 N1  | 1.3300 | 1.1433 | 0.0002 | 0.0024 |
| pos_1348 | TG(16:1e/18:1/18:1) | pos | C55 H106 O5 N1  | 1.0293 | 1.1332 | 0.0207 | 0.0385 |



|          |                     |     |                 |        |        |        |        |
|----------|---------------------|-----|-----------------|--------|--------|--------|--------|
| pos_1350 | TG(16:0/16:0/20:4)  | pos | C55 H98 O6 Na1  | 1.0193 | 1.1469 | 0.0281 | 0.0495 |
| pos_1352 | TG(16:0e/16:0/20:4) | pos | C55 H104 O5 N1  | 1.1001 | 1.1147 | 0.0031 | 0.0098 |
| pos_1353 | TG(16:0/16:1/20:4)  | pos | C55 H96 O6 Na1  | 0.9573 | 1.1082 | 0.0291 | 0.0509 |
| pos_1367 | TG(18:0/17:0/18:0)  | pos | C56 H112 O6 N1  | 0.8637 | 1.0822 | 0.0447 | 0.0720 |
| pos_1381 | TG(18:1/17:1/18:3)  | pos | C56 H98 O6 Li1  | 1.2011 | 1.1616 | 0.0003 | 0.0027 |
| pos_1410 | TG(18:0e/18:0/18:1) | pos | C57 H111 O5     | 0.9450 | 1.0838 | 0.0013 | 0.0055 |
| pos_1412 | TG(16:0e/18:1/20:1) | pos | C57 H112 O5 N1  | 0.9235 | 1.0664 | 0.0003 | 0.0029 |
| pos_1415 | TG(18:1e/18:1/18:1) | pos | C57 H110 O5 N1  | 1.0171 | 1.1084 | 0.0021 | 0.0077 |
| pos_1495 | TG(18:0e/16:0/22:1) | pos | C59 H115 O5     | 0.8875 | 1.0819 | 0.0025 | 0.0085 |
| pos_1499 | TG(16:0e/18:1/22:1) | pos | C59 H116 O5 N1  | 1.0434 | 1.0735 | 0.0000 | 0.0009 |
| pos_1622 | TG(20:0/16:0/24:0)  | pos | C63 H126 O6 N1  | 1.1742 | 1.1636 | 0.0439 | 0.0710 |
| pos_1636 | TG(16:1/22:6/22:6)  | pos | C63 H97 O6      | 1.7415 | 1.2910 | 0.0007 | 0.0040 |
| pos_1662 | TG(20:1/18:1/22:6)  | pos | C63 H106 O6 Na1 | 0.9732 | 1.0829 | 0.0015 | 0.0061 |
| pos_1669 | TG(22:5/17:1/22:6)  | pos | C64 H100 O6 Na1 | 0.9655 | 1.0998 | 0.0085 | 0.0202 |
| pos_1670 | TG(17:0/22:6/22:6)  | pos | C64 H100 O6 Na1 | 1.1298 | 1.1252 | 0.0009 | 0.0045 |
| pos_1695 | TG(18:1/22:5/22:5)  | pos | C65 H105 O6     | 0.9738 | 1.0829 | 0.0015 | 0.0061 |
| pos_1728 | TG(15:0/24:1/24:1)  | pos | C66 H124 O6 Li1 | 1.8987 | 1.3831 | 0.0004 | 0.0031 |
| pos_1737 | TG(24:1/17:1/22:4)  | pos | C66 H120 O6 N1  | 0.9197 | 1.1027 | 0.0358 | 0.0605 |
| pos_1758 | TG(20:2/22:6/22:6)  | pos | C67 H102 O6 Na1 | 1.0076 | 1.1106 | 0.0066 | 0.0166 |
| pos_1760 | TG(20:3/22:6/22:6)  | pos | C67 H101 O6     | 0.9908 | 1.0805 | 0.0002 | 0.0025 |
| pos_1935 | ZyE(20:4)           | pos | C47 H75 O2      | 1.7581 | 1.3389 | 0.0008 | 0.0043 |
| pos_1936 | ZyE(20:5)           | pos | C47 H73 O2      | 1.7835 | 1.3096 | 0.0002 | 0.0025 |
| pos_1937 | ZyE(22:4)           | pos | C49 H82 O2 N1   | 1.8289 | 1.3202 | 0.0001 | 0.0023 |

# Supplementary Material

|          |                         |     |                  |        |        |        |        |
|----------|-------------------------|-----|------------------|--------|--------|--------|--------|
| pos_1938 | ZyE(22:5)               | pos | C49 H77 O2       | 1.6426 | 1.2921 | 0.0007 | 0.0038 |
| pos_1939 | ZyE(22:6)               | pos | C49 H75 O2       | 1.7540 | 1.2893 | 0.0002 | 0.0026 |
| neg_9    | CL(24:0/14:0/16:0/18:0) | neg | C81 H156 O17 P2  | 1.1892 | 1.1022 | 0.0010 | 0.0074 |
| neg_14   | CL(23:0/15:0/16:0/20:0) | neg | C83 H160 O17 P2  | 0.9361 | 1.0536 | 0.0011 | 0.0075 |
| neg_35   | CL(23:0/18:1/18:1/22:3) | neg | C90 H164 O17 P2  | 1.8562 | 1.3701 | 0.0067 | 0.0247 |
| neg_49   | Cer(d16:1/22:0+O)       | neg | C38 H74 O4 N1    | 1.0952 | 1.0918 | 0.0032 | 0.0151 |
| neg_51   | Cer(d18:0/22:0)         | neg | C41 H82 O5 N1    | 1.1098 | 1.1156 | 0.0096 | 0.0307 |
| neg_58   | Cer(d18:0/24:1)         | neg | C43 H84 O5 N1    | 1.5320 | 1.1812 | 0.0001 | 0.0020 |
| neg_66   | Cer(t16:1/24:1)         | neg | C41 H78 O6 N1    | 1.0394 | 1.0767 | 0.0050 | 0.0199 |
| neg_81   | GM3(m22:0/24:0)         | neg | C69 H128 O20 N2  | 1.8407 | 1.3024 | 0.0003 | 0.0036 |
| neg_133  | LdMePE(16:0e)           | neg | C23 H49 O6 N1 P1 | 1.0035 | 1.0711 | 0.0047 | 0.0192 |
| neg_135  | LdMePE(16:1e)           | neg | C23 H47 O6 N1 P1 | 1.0233 | 1.1031 | 0.0419 | 0.0894 |
| neg_136  | LdMePE(17:0)            | neg | C24 H49 O7 N1 P1 | 1.0740 | 1.1047 | 0.0110 | 0.0337 |
| neg_139  | LdMePE(18:0e)           | neg | C25 H53 O6 N1 P1 | 1.3959 | 1.1393 | 0.0003 | 0.0037 |
| neg_140  | LdMePE(18:1e)           | neg | C25 H51 O6 N1 P1 | 1.1976 | 1.1058 | 0.0039 | 0.0169 |
| neg_143  | LdMePE(19:0)            | neg | C26 H53 O7 N1 P1 | 1.4150 | 1.1674 | 0.0024 | 0.0126 |
| neg_146  | LdMePE(20:0e)           | neg | C27 H57 O6 N1 P1 | 1.7196 | 1.2399 | 0.0000 | 0.0000 |
| neg_155  | LdMePE(24:1)            | neg | C31 H61 O7 N1 P1 | 1.2306 | 1.1786 | 0.0168 | 0.0456 |
| neg_164  | MGDG(14:1e/18:1)        | neg | C43 H79 O11      | 1.0883 | 1.0983 | 0.0415 | 0.0891 |
| neg_167  | MGDG(18:1/16:0p)        | neg | C45 H83 O11      | 1.1000 | 1.0847 | 0.0014 | 0.0091 |
| neg_184  | MLCL(14:2/15:0/15:0)    | neg | C53 H98 O16 P2   | 0.9547 | 1.0843 | 0.0153 | 0.0428 |
| neg_191  | MLCL(14:2/18:0/18:0)    | neg | C59 H110 O16 P2  | 1.1860 | 1.0955 | 0.0002 | 0.0032 |
| neg_197  | MLCL(14:2/20:0/20:0)    | neg | C63 H118 O16 P2  | 1.1967 | 1.1467 | 0.0082 | 0.0279 |

|         |                      |     |                   |        |        |        |        |
|---------|----------------------|-----|-------------------|--------|--------|--------|--------|
| neg_204 | MLCL(14:2/22:0/22:0) | neg | C67 H126 O16 P2   | 1.3358 | 1.1994 | 0.0110 | 0.0337 |
| neg_208 | MLCL(14:2/24:1/24:1) | neg | C71 H130 O16 P2   | 1.4159 | 1.1827 | 0.0031 | 0.0148 |
| neg_229 | PC(17:0/18:1)        | neg | C44 H85 O10 N1 P1 | 0.9398 | 1.0645 | 0.0053 | 0.0206 |
| neg_232 | PC(20:1e/16:0)       | neg | C45 H89 O9 N1 P1  | 1.0455 | 1.0850 | 0.0021 | 0.0114 |
| neg_233 | PC(18:1e/18:1)       | neg | C43 H83 O7 N1 P1  | 0.9104 | 1.0647 | 0.0038 | 0.0169 |
| neg_251 | PC(18:1e/22:5)       | neg | C49 H87 O9 N1 P1  | 1.0700 | 1.1030 | 0.0137 | 0.0395 |
| neg_253 | PC(24:0/20:5)        | neg | C53 H95 O10 N1 P1 | 1.3325 | 1.2078 | 0.0279 | 0.0673 |
| neg_256 | PC(24:0/22:6)        | neg | C55 H97 O10 N1 P1 | 2.8364 | 5.2651 | 0.0088 | 0.0294 |
| neg_333 | PE(16:1/22:5)        | neg | C43 H73 O8 N1 P1  | 1.0334 | 1.0952 | 0.0158 | 0.0439 |
| neg_342 | PE(19:0/20:4)        | neg | C44 H79 O8 N1 P1  | 1.1225 | 1.1167 | 0.0214 | 0.0561 |
| neg_349 | PE(20:0/20:4)        | neg | C45 H81 O8 N1 P1  | 1.0791 | 1.0877 | 0.0018 | 0.0103 |
| neg_361 | PE(20:0/22:5)        | neg | C47 H83 O8 N1 P1  | 1.0140 | 1.0900 | 0.0106 | 0.0331 |
| neg_403 | PG(14:0/22:6)        | neg | C42 H70 O10 N0 P1 | 1.3175 | 1.1504 | 0.0016 | 0.0096 |
| neg_446 | PI(18:0/22:4)        | neg | C49 H86 O13 N0 P1 | 1.1121 | 1.0911 | 0.0236 | 0.0599 |
| neg_468 | PS(18:0/19:0)        | neg | C43 H83 O10 N1 P1 | 0.9812 | 1.0482 | 0.0004 | 0.0041 |
| neg_472 | PS(18:0/20:0)        | neg | C44 H85 O10 N1 P1 | 1.0960 | 1.0805 | 0.0010 | 0.0074 |
| neg_475 | PS(18:0/20:4)        | neg | C44 H77 O10 N1 P1 | 1.8388 | 1.2403 | 0.0000 | 0.0011 |
| neg_479 | PS(18:0/20:5)        | neg | C44 H75 O10 N1 P1 | 1.4103 | 1.1533 | 0.0008 | 0.0064 |
| neg_488 | PS(17:0/22:6)        | neg | C45 H75 O10 N1 P1 | 1.1829 | 1.1196 | 0.0026 | 0.0136 |
| neg_521 | PS(20:3/22:6)        | neg | C48 H75 O10 N1 P1 | 1.1872 | 1.1180 | 0.0130 | 0.0379 |
| neg_540 | dMePE(14:0/14:0)     | neg | C35 H69 O8 N1 P1  | 1.7115 | 1.2273 | 0.0000 | 0.0005 |
| neg_542 | dMePE(16:0/14:0)     | neg | C37 H73 O8 N1 P1  | 1.2221 | 1.1072 | 0.0011 | 0.0075 |
| neg_544 | dMePE(16:1/14:0)     | neg | C37 H71 O8 N1 P1  | 1.3755 | 1.1615 | 0.0292 | 0.0691 |

# Supplementary Material

|         |                   |     |                  |        |        |        |        |
|---------|-------------------|-----|------------------|--------|--------|--------|--------|
| neg_547 | dMePE(15:0/16:0)  | neg | C38 H75 O8 N1 P1 | 1.4279 | 1.1790 | 0.0038 | 0.0169 |
| neg_551 | dMePE(16:0/16:1)  | neg | C39 H75 O8 N1 P1 | 1.0299 | 1.0647 | 0.0003 | 0.0033 |
| neg_556 | dMePE(17:1/16:0)  | neg | C40 H77 O8 N1 P1 | 1.1380 | 1.0849 | 0.0004 | 0.0038 |
| neg_557 | dMePE(16:0/18:1)  | neg | C41 H79 O8 N1 P1 | 0.9357 | 1.0512 | 0.0010 | 0.0073 |
| neg_561 | dMePE(14:0/20:4)  | neg | C41 H73 O8 N1 P1 | 1.2439 | 1.1264 | 0.0016 | 0.0094 |
| neg_583 | dMePE(18:0e/20:4) | neg | C45 H83 O7 N1 P1 | 1.4000 | 1.1371 | 0.0021 | 0.0115 |
| neg_604 | phSM(d20:0/14:0)  | neg | C40 H82 O9 N2 P1 | 1.1081 | 1.0914 | 0.0002 | 0.0032 |

**1.8 Table S8. Lower abundant levels of lipid species in simple-packaged (SP) pike eels in comparison with vacuum-packaged (VP) pike eels via LC-MS/MS analysis.**

| ID      | Lipids              | Mode | Formula              | VIP    | FC     | <i>P</i> value | FDR    |
|---------|---------------------|------|----------------------|--------|--------|----------------|--------|
| pos_4   | BisMePA(10:1e/18:1) | pos  | C33 H63 O7 N0 P1 Na1 | 1.4957 | 0.8192 | 0.0000         | 0.0019 |
| pos_28  | BisMePA(30:0/15:0)  | pos  | C50 H103 O8 N1 P1    | 1.3715 | 0.8386 | 0.0031         | 0.0097 |
| pos_120 | Co(Q8)              | pos  | C49 H75 O4           | 1.7703 | 0.8843 | 0.0030         | 0.0096 |
| pos_121 | Co(Q9)              | pos  | C54 H83 O4           | 2.4884 | 0.7315 | 0.0000         | 0.0000 |
| pos_122 | DG(16:1/12:0)       | pos  | C31 H58 O5 Na1       | 1.1582 | 0.8780 | 0.0035         | 0.0106 |
| pos_124 | DG(16:1/14:0)       | pos  | C33 H66 O5 N1        | 1.0279 | 0.9125 | 0.0027         | 0.0089 |
| pos_126 | DG(18:4/12:0)       | pos  | C33 H56 O5 Na1       | 1.8980 | 0.5893 | 0.0361         | 0.0610 |
| pos_133 | DG(16:1e/16:0)      | pos  | C35 H68 O4 Na1       | 1.0087 | 0.9225 | 0.0058         | 0.0151 |
| pos_134 | DG(16:1/16:1)       | pos  | C35 H68 O5 N1        | 1.3711 | 0.8525 | 0.0022         | 0.0077 |
| pos_135 | DG(14:0/18:3)       | pos  | C35 H63 O5           | 1.1953 | 0.8701 | 0.0018         | 0.0070 |
| pos_136 | DG(18:4/14:0)       | pos  | C35 H64 O5 N1        | 1.1828 | 0.8672 | 0.0278         | 0.0491 |
| pos_137 | DG(12:0/20:5)       | pos  | C35 H58 O5 Na1       | 1.5159 | 0.7103 | 0.0330         | 0.0565 |
| pos_140 | DG(15:0/18:1)       | pos  | C36 H72 O5 N1        | 1.0227 | 0.9033 | 0.0051         | 0.0138 |
| pos_141 | DG(17:1/16:0)       | pos  | C36 H72 O5 N1        | 1.0423 | 0.9226 | 0.0001         | 0.0024 |
| pos_142 | DG(17:1/16:1)       | pos  | C36 H70 O5 N1        | 1.0997 | 0.8927 | 0.0087         | 0.0205 |
| pos_143 | DG(15:0/18:3)       | pos  | C36 H68 O5 N1        | 1.2384 | 0.8705 | 0.0049         | 0.0133 |
| pos_144 | DG(18:4/15:0)       | pos  | C36 H66 O5 N1        | 1.2883 | 0.8600 | 0.0001         | 0.0024 |
| pos_149 | DG(16:1/18:1)       | pos  | C37 H72 O5 N1        | 1.0847 | 0.9178 | 0.0012         | 0.0053 |
| pos_150 | DG(16:1/18:2)       | pos  | C37 H70 O5 N1        | 1.2850 | 0.8776 | 0.0004         | 0.0032 |
| pos_151 | DG(16:0/18:3)       | pos  | C37 H67 O5           | 1.6047 | 0.7333 | 0.0496         | 0.0788 |
| pos_152 | DG(16:1/18:3)       | pos  | C37 H68 O5 N1        | 1.2457 | 0.8756 | 0.0052         | 0.0140 |

# Supplementary Material

|         |                |     |                |        |        |        |        |
|---------|----------------|-----|----------------|--------|--------|--------|--------|
| pos_153 | DG(18:4/16:0)  | pos | C37 H65 O5     | 1.3397 | 0.8590 | 0.0004 | 0.0032 |
| pos_154 | DG(18:3e/16:1) | pos | C37 H67 O4     | 1.0954 | 0.8607 | 0.0168 | 0.0331 |
| pos_155 | DG(18:4/16:1)  | pos | C37 H63 O5     | 1.2340 | 0.8653 | 0.0039 | 0.0114 |
| pos_156 | DG(14:0/20:5)  | pos | C37 H63 O5     | 1.2893 | 0.8778 | 0.0001 | 0.0024 |
| pos_157 | DG(20:5/14:1)  | pos | C37 H64 O5 N1  | 2.9372 | 0.2214 | 0.0004 | 0.0032 |
| pos_158 | DG(12:0/22:6)  | pos | C37 H64 O5 N1  | 1.4147 | 0.8420 | 0.0002 | 0.0024 |
| pos_162 | DG(17:1/18:1)  | pos | C38 H74 O5 N1  | 1.1823 | 0.9025 | 0.0001 | 0.0023 |
| pos_165 | DG(15:0/20:4)  | pos | C38 H70 O5 N1  | 1.3861 | 0.8209 | 0.0049 | 0.0133 |
| pos_167 | DG(22:6/13:0)  | pos | C38 H66 O5 N1  | 1.2044 | 0.8833 | 0.0008 | 0.0044 |
| pos_171 | DG(18:1/18:1)  | pos | C39 H72 O5 Na1 | 1.1967 | 0.8982 | 0.0000 | 0.0019 |
| pos_172 | DG(18:0/18:2)  | pos | C39 H76 O5 N1  | 1.0595 | 0.8894 | 0.0166 | 0.0328 |
| pos_173 | DG(18:1/18:2)  | pos | C39 H74 O5 N1  | 1.2062 | 0.8968 | 0.0003 | 0.0027 |
| pos_180 | DG(16:0/20:5)  | pos | C39 H70 O5 N1  | 1.3466 | 0.8790 | 0.0001 | 0.0024 |
| pos_181 | DG(18:3e/18:2) | pos | C39 H69 O4     | 0.9900 | 0.9282 | 0.0002 | 0.0026 |
| pos_183 | DG(22:5/14:1)  | pos | C39 H64 O5 Na1 | 1.4098 | 0.8361 | 0.0002 | 0.0027 |
| pos_184 | DG(16:1/20:5)  | pos | C39 H68 O5 N1  | 1.5123 | 0.8387 | 0.0002 | 0.0026 |
| pos_185 | DG(18:4/18:3)  | pos | C39 H66 O5 N1  | 1.3926 | 0.8387 | 0.0004 | 0.0029 |
| pos_186 | DG(22:6/14:1)  | pos | C39 H66 O5 N1  | 1.3446 | 0.8582 | 0.0005 | 0.0034 |
| pos_187 | DG(18:4/18:4)  | pos | C39 H61 O5     | 1.4236 | 0.8146 | 0.0004 | 0.0029 |
| pos_188 | DG(22:6/14:2)  | pos | C39 H64 O5 N1  | 1.1905 | 0.8518 | 0.0018 | 0.0069 |
| pos_189 | DG(22:6/14:3)  | pos | C39 H62 O5 N1  | 1.5006 | 0.8476 | 0.0000 | 0.0008 |
| pos_193 | DG(17:1/20:2)  | pos | C40 H76 O5 N1  | 1.2547 | 0.8535 | 0.0019 | 0.0071 |
| pos_197 | DG(17:1/20:4)  | pos | C40 H72 O5 N1  | 1.5116 | 0.8242 | 0.0001 | 0.0024 |

|         |               |     |               |        |        |        |        |
|---------|---------------|-----|---------------|--------|--------|--------|--------|
| pos_198 | DG(15:0/22:5) | pos | C40 H69 O5    | 1.3443 | 0.8590 | 0.0002 | 0.0025 |
| pos_199 | DG(17:0/20:5) | pos | C40 H72 O5 N1 | 1.3804 | 0.8777 | 0.0084 | 0.0201 |
| pos_200 | DG(17:1/20:5) | pos | C40 H70 O5 N1 | 1.5295 | 0.8351 | 0.0000 | 0.0010 |
| pos_201 | DG(15:0/22:6) | pos | C40 H70 O5 N1 | 1.3102 | 0.8503 | 0.0043 | 0.0123 |
| pos_203 | DG(20:1/18:1) | pos | C41 H80 O5 N1 | 1.0550 | 0.9188 | 0.0004 | 0.0029 |
| pos_205 | DG(18:1/20:2) | pos | C41 H78 O5 N1 | 1.2452 | 0.8840 | 0.0002 | 0.0027 |
| pos_206 | DG(18:1/20:3) | pos | C41 H73 O5    | 1.4057 | 0.7636 | 0.0361 | 0.0610 |
| pos_207 | DG(16:0/22:4) | pos | C41 H76 O5 N1 | 1.1042 | 0.9124 | 0.0001 | 0.0024 |
| pos_210 | DG(18:0/20:5) | pos | C41 H74 O5 N1 | 1.1791 | 0.9060 | 0.0001 | 0.0023 |
| pos_214 | DG(16:1/22:5) | pos | C41 H69 O5    | 1.4094 | 0.8498 | 0.0012 | 0.0053 |
| pos_215 | DG(16:0/22:6) | pos | C41 H72 O5 N1 | 1.1651 | 0.9141 | 0.0002 | 0.0027 |
| pos_217 | DG(16:1/22:6) | pos | C41 H67 O5    | 1.4324 | 0.8456 | 0.0018 | 0.0069 |
| pos_218 | DG(18:3/20:5) | pos | C41 H65 O5    | 1.0648 | 0.8830 | 0.0082 | 0.0198 |
| pos_219 | DG(18:4/20:5) | pos | C41 H63 O5    | 1.2193 | 0.8609 | 0.0039 | 0.0115 |
| pos_220 | DG(17:1/22:1) | pos | C42 H82 O5 N1 | 0.9889 | 0.9146 | 0.0011 | 0.0050 |
| pos_221 | DG(17:1/22:2) | pos | C42 H80 O5 N1 | 1.1384 | 0.8581 | 0.0221 | 0.0408 |
| pos_222 | DG(19:0/20:3) | pos | C42 H80 O5 N1 | 1.1897 | 0.8645 | 0.0030 | 0.0097 |
| pos_225 | DG(17:0/22:5) | pos | C42 H76 O5 N1 | 1.4065 | 0.8609 | 0.0000 | 0.0017 |
| pos_226 | DG(17:1/22:4) | pos | C42 H73 O5    | 1.0682 | 0.9162 | 0.0001 | 0.0024 |
| pos_227 | DG(17:1/22:5) | pos | C42 H74 O5 N1 | 1.0380 | 0.9226 | 0.0002 | 0.0025 |
| pos_228 | DG(17:0/22:6) | pos | C42 H74 O5 N1 | 1.1705 | 0.8953 | 0.0016 | 0.0063 |
| pos_229 | DG(17:1/22:6) | pos | C42 H72 O5 N1 | 1.3395 | 0.8760 | 0.0002 | 0.0024 |
| pos_231 | DG(18:4/22:6) | pos | C43 H65 O5    | 1.4788 | 0.8368 | 0.0001 | 0.0023 |

# Supplementary Material

|         |               |     |                |        |        |        |        |
|---------|---------------|-----|----------------|--------|--------|--------|--------|
| pos_232 | DG(18:1/22:1) | pos | C43 H84 O5 N1  | 1.0201 | 0.9204 | 0.0005 | 0.0034 |
| pos_233 | DG(18:1/22:2) | pos | C43 H82 O5 N1  | 1.0809 | 0.9021 | 0.0010 | 0.0047 |
| pos_237 | DG(18:1/22:4) | pos | C43 H78 O5 N1  | 1.3169 | 0.8765 | 0.0002 | 0.0027 |
| pos_239 | DG(18:0/22:5) | pos | C43 H78 O5 N1  | 1.0490 | 0.9205 | 0.0004 | 0.0031 |
| pos_240 | DG(18:1/22:5) | pos | C43 H73 O5     | 1.3108 | 0.8798 | 0.0003 | 0.0028 |
| pos_241 | DG(18:0/22:6) | pos | C43 H76 O5 N1  | 1.0293 | 0.9298 | 0.0003 | 0.0027 |
| pos_242 | DG(20:3/20:4) | pos | C43 H70 O5 Na1 | 1.4930 | 0.8285 | 0.0004 | 0.0032 |
| pos_243 | DG(22:5/18:2) | pos | C43 H71 O5     | 1.5143 | 0.8121 | 0.0004 | 0.0032 |
| pos_244 | DG(18:1/22:6) | pos | C43 H74 O5 N1  | 1.2645 | 0.8996 | 0.0003 | 0.0027 |
| pos_245 | DG(18:3/22:5) | pos | C43 H72 O5 N1  | 1.6312 | 0.7951 | 0.0001 | 0.0024 |
| pos_246 | DG(18:2/22:6) | pos | C43 H72 O5 N1  | 1.4073 | 0.8622 | 0.0002 | 0.0026 |
| pos_248 | DG(18:3/22:6) | pos | C43 H70 O5 N1  | 1.8284 | 0.8063 | 0.0023 | 0.0079 |
| pos_249 | DG(19:0/22:5) | pos | C44 H80 O5 N1  | 1.0157 | 0.9161 | 0.0002 | 0.0026 |
| pos_250 | DG(19:1/22:5) | pos | C44 H78 O5 N1  | 1.2154 | 0.8635 | 0.0046 | 0.0129 |
| pos_252 | DG(19:1/22:6) | pos | C44 H76 O5 N1  | 1.3246 | 0.8697 | 0.0003 | 0.0027 |
| pos_254 | DG(20:5/22:6) | pos | C45 H67 O5     | 1.3242 | 0.8774 | 0.0003 | 0.0027 |
| pos_258 | DG(20:1/22:4) | pos | C45 H82 O5 N1  | 1.0999 | 0.9013 | 0.0004 | 0.0031 |
| pos_260 | DG(20:0/22:5) | pos | C45 H82 O5 N1  | 1.2166 | 0.8714 | 0.0351 | 0.0597 |
| pos_262 | DG(20:0/22:6) | pos | C45 H80 O5 N1  | 1.1662 | 0.8984 | 0.0015 | 0.0061 |
| pos_264 | DG(20:1/22:6) | pos | C45 H78 O5 N1  | 1.2424 | 0.8926 | 0.0002 | 0.0027 |
| pos_266 | DG(20:2/22:6) | pos | C45 H76 O5 N1  | 1.3556 | 0.8668 | 0.0003 | 0.0028 |
| pos_267 | DG(22:5/20:4) | pos | C45 H74 O5 N1  | 1.2204 | 0.8667 | 0.0010 | 0.0048 |
| pos_269 | DG(22:5/21:1) | pos | C46 H82 O5 N1  | 1.2782 | 0.8561 | 0.0011 | 0.0049 |



|         |                 |     |                      |        |        |        |        |
|---------|-----------------|-----|----------------------|--------|--------|--------|--------|
| pos_270 | DG(22:6/21:0)   | pos | C46 H82 O5 N1        | 1.2315 | 0.8691 | 0.0008 | 0.0042 |
| pos_271 | DG(22:6/21:1)   | pos | C46 H80 O5 N1        | 1.4144 | 0.8268 | 0.0003 | 0.0028 |
| pos_272 | DG(22:5/22:5)   | pos | C47 H73 O5           | 1.5146 | 0.8137 | 0.0003 | 0.0029 |
| pos_274 | DG(22:5/22:6)   | pos | C47 H71 O5           | 1.4503 | 0.8488 | 0.0002 | 0.0026 |
| pos_276 | DG(22:1/22:4)   | pos | C47 H86 O5 N1        | 1.0407 | 0.9041 | 0.0010 | 0.0048 |
| pos_279 | DG(22:0/22:6)   | pos | C47 H84 O5 N1        | 1.2293 | 0.8683 | 0.0028 | 0.0092 |
| pos_282 | DG(22:4/22:4)   | pos | C47 H80 O5 N1        | 1.1798 | 0.8750 | 0.0009 | 0.0046 |
| pos_284 | DG(22:4/22:5)   | pos | C47 H78 O5 N1        | 1.3314 | 0.8601 | 0.0006 | 0.0036 |
| pos_285 | DG(22:6/23:1)   | pos | C48 H84 O5 N1        | 1.2436 | 0.8659 | 0.0008 | 0.0043 |
| pos_286 | DG(24:1/22:5)   | pos | C49 H88 O5 N1        | 1.1804 | 0.8826 | 0.0005 | 0.0034 |
| pos_287 | DG(24:1/22:6)   | pos | C49 H86 O5 N1        | 1.2335 | 0.8841 | 0.0005 | 0.0034 |
| pos_288 | DG(24:2/22:6)   | pos | C49 H84 O5 N1        | 1.5945 | 0.7948 | 0.0003 | 0.0027 |
| pos_292 | DG(37:0/16:0)   | pos | C56 H110 O5 K1       | 1.0295 | 0.9012 | 0.0080 | 0.0195 |
| pos_378 | LPE(16:1)       | pos | C21 H42 O7 N1 P1 Na1 | 1.9573 | 0.8345 | 0.0002 | 0.0024 |
| pos_404 | MePC(8:0/22:5)  | pos | C39 H68 O8 N1 P1 Na1 | 2.2232 | 0.7728 | 0.0000 | 0.0001 |
| pos_435 | MePC(22:6/12:3) | pos | C43 H68 O8 N1 P1 Na1 | 1.9422 | 0.8190 | 0.0000 | 0.0002 |
| pos_459 | MePC(18:4/20:4) | pos | C47 H78 O8 N1 P1 Na1 | 1.1625 | 0.8743 | 0.0086 | 0.0204 |
| pos_502 | PC(11:0/16:1)   | pos | C35 H69 O8 N1 P1     | 1.5763 | 0.8802 | 0.0187 | 0.0357 |
| pos_505 | PC(16:0/12:0)   | pos | C36 H73 O8 N1 P1     | 1.3663 | 0.8589 | 0.0005 | 0.0033 |
| pos_511 | PC(11:0/18:2)   | pos | C37 H71 O8 N1 P1     | 1.8830 | 0.8194 | 0.0001 | 0.0024 |
| pos_512 | PC(16:0/14:0)   | pos | C38 H77 O8 N1 P1     | 0.9453 | 0.9151 | 0.0210 | 0.0390 |
| pos_519 | PC(16:1/14:1)   | pos | C38 H73 O8 N1 P1     | 1.9908 | 0.8690 | 0.0056 | 0.0148 |
| pos_530 | PC(17:1/14:1)   | pos | C39 H75 O8 N1 P1     | 1.5606 | 0.8641 | 0.0001 | 0.0024 |

## Supplementary Material

|         |                |     |                      |        |        |        |        |
|---------|----------------|-----|----------------------|--------|--------|--------|--------|
| pos_565 | PC(11:0/22:6)  | pos | C41 H71 O8 N1 P1     | 1.7015 | 0.8407 | 0.0000 | 0.0002 |
| pos_779 | PE(16:0/16:1)  | pos | C37 H73 O8 N1 P1     | 1.8490 | 0.8411 | 0.0000 | 0.0016 |
| pos_781 | PE(16:1/16:1)  | pos | C37 H70 O8 N1 P1 Na1 | 1.9830 | 0.8219 | 0.0020 | 0.0072 |
| pos_783 | PE(17:1/16:1)  | pos | C38 H73 O8 N1 P1     | 1.9795 | 0.8635 | 0.0009 | 0.0045 |
| pos_787 | PE(16:1/18:1)  | pos | C39 H75 O8 N1 P1     | 1.5606 | 0.8640 | 0.0001 | 0.0024 |
| pos_790 | PE(16:1/18:2)  | pos | C39 H72 O8 N1 P1 Na1 | 1.6996 | 0.8309 | 0.0000 | 0.0002 |
| pos_808 | PE(16:1/20:5)  | pos | C41 H71 O8 N1 P1     | 1.6904 | 0.8408 | 0.0000 | 0.0002 |
| pos_821 | PE(16:1/22:6)  | pos | C43 H73 O8 N1 P1     | 1.1916 | 0.9064 | 0.0001 | 0.0024 |
| pos_842 | PE(20:3/22:5)  | pos | C47 H78 O8 N1 P1 Na1 | 1.1350 | 0.8744 | 0.0059 | 0.0153 |
| pos_847 | PEt(15:0/12:0) | pos | C32 H64 O8 N0 P1     | 1.3134 | 0.8711 | 0.0002 | 0.0026 |
| pos_848 | PEt(15:0/13:0) | pos | C33 H66 O8 N0 P1     | 1.3348 | 0.8559 | 0.0005 | 0.0034 |
| pos_849 | PEt(15:0/14:0) | pos | C34 H68 O8 N0 P1     | 1.2039 | 0.8982 | 0.0003 | 0.0028 |
| pos_850 | PEt(15:0/14:1) | pos | C34 H66 O8 N0 P1     | 1.2945 | 0.8721 | 0.0011 | 0.0049 |
| pos_852 | PEt(15:0/16:1) | pos | C36 H70 O8 N0 P1     | 1.1570 | 0.9028 | 0.0015 | 0.0061 |
| pos_853 | PEt(15:0/17:0) | pos | C37 H74 O8 N0 P1     | 1.0942 | 0.9119 | 0.0005 | 0.0034 |
| pos_854 | PEt(17:1/15:0) | pos | C37 H72 O8 N0 P1     | 1.3315 | 0.8754 | 0.0001 | 0.0024 |
| pos_855 | PEt(18:0/15:0) | pos | C38 H76 O8 N0 P1     | 1.4060 | 0.8622 | 0.0001 | 0.0024 |
| pos_857 | PEt(15:0/18:2) | pos | C38 H72 O8 N0 P1     | 1.4816 | 0.8281 | 0.0008 | 0.0041 |
| pos_858 | PEt(15:0/19:0) | pos | C39 H78 O8 N0 P1     | 1.1263 | 0.9049 | 0.0002 | 0.0024 |
| pos_859 | PEt(19:1/15:0) | pos | C39 H76 O8 N0 P1     | 1.2105 | 0.8867 | 0.0005 | 0.0035 |
| pos_860 | PEt(20:0/15:0) | pos | C40 H80 O8 N0 P1     | 1.0823 | 0.9127 | 0.0015 | 0.0062 |
| pos_862 | PEt(15:0/20:1) | pos | C40 H78 O8 N0 P1     | 1.0516 | 0.9212 | 0.0003 | 0.0028 |
| pos_863 | PEt(15:0/20:2) | pos | C40 H76 O8 N0 P1     | 1.0339 | 0.9237 | 0.0001 | 0.0022 |

|         |                |     |                       |        |        |        |        |
|---------|----------------|-----|-----------------------|--------|--------|--------|--------|
| pos_864 | PEt(15:0/21:0) | pos | C41 H82 O8 N0 P1      | 1.2539 | 0.8715 | 0.0002 | 0.0024 |
| pos_865 | PEt(15:0/22:0) | pos | C42 H84 O8 N0 P1      | 1.0547 | 0.9085 | 0.0005 | 0.0035 |
| pos_866 | PEt(15:0/22:1) | pos | C42 H82 O8 N0 P1      | 1.0958 | 0.9077 | 0.0009 | 0.0046 |
| pos_868 | PEt(15:0/22:5) | pos | C42 H74 O8 N0 P1      | 1.2438 | 0.8891 | 0.0006 | 0.0035 |
| pos_869 | PEt(15:0/22:6) | pos | C42 H72 O8 N0 P1      | 1.3328 | 0.8766 | 0.0004 | 0.0031 |
| pos_870 | PEt(15:0/24:1) | pos | C44 H86 O8 N0 P1      | 1.1291 | 0.9040 | 0.0002 | 0.0024 |
| pos_873 | PG(16:1/16:1)  | pos | C38 H71 O10 N0 P1 Na1 | 1.8446 | 0.8312 | 0.0007 | 0.0041 |
| pos_882 | PI(16:1/22:6)  | pos | C47 H81 O13 N1 P1     | 1.8725 | 0.8162 | 0.0004 | 0.0031 |
| pos_886 | PI(22:6/22:6)  | pos | C53 H83 O13 N1 P1     | 1.5324 | 0.8170 | 0.0022 | 0.0078 |
| pos_887 | PMe(16:0/12:0) | pos | C32 H64 O8 N0 P1      | 1.3134 | 0.8710 | 0.0002 | 0.0026 |
| pos_889 | PMe(16:0/14:0) | pos | C34 H68 O8 N0 P1      | 1.2039 | 0.8982 | 0.0003 | 0.0028 |
| pos_890 | PMe(16:0/14:1) | pos | C34 H66 O8 N0 P1      | 1.2959 | 0.8717 | 0.0010 | 0.0048 |
| pos_892 | PMe(16:0/16:1) | pos | C36 H70 O8 N0 P1      | 1.2011 | 0.8978 | 0.0010 | 0.0048 |
| pos_893 | PMe(16:0/17:0) | pos | C37 H74 O8 N0 P1      | 1.0839 | 0.9104 | 0.0002 | 0.0024 |
| pos_894 | PMe(17:1/16:0) | pos | C37 H72 O8 N0 P1      | 1.3325 | 0.8752 | 0.0001 | 0.0024 |
| pos_895 | PMe(18:0/16:0) | pos | C38 H76 O8 N0 P1      | 1.3564 | 0.8688 | 0.0002 | 0.0024 |
| pos_897 | PMe(16:0/18:2) | pos | C38 H72 O8 N0 P1      | 1.4157 | 0.8455 | 0.0018 | 0.0069 |
| pos_899 | PMe(19:1/16:0) | pos | C39 H76 O8 N0 P1      | 1.2243 | 0.8706 | 0.0043 | 0.0123 |
| pos_900 | PMe(20:0/16:0) | pos | C40 H80 O8 N0 P1      | 1.2178 | 0.8902 | 0.0001 | 0.0024 |
| pos_901 | PMe(18:0/18:1) | pos | C40 H78 O8 N0 P1      | 1.4223 | 0.8330 | 0.0022 | 0.0077 |
| pos_902 | PMe(16:0/20:1) | pos | C40 H78 O8 N0 P1      | 1.0516 | 0.9213 | 0.0003 | 0.0028 |
| pos_903 | PMe(16:0/20:2) | pos | C40 H76 O8 N0 P1      | 1.0339 | 0.9236 | 0.0001 | 0.0022 |
| pos_904 | PMe(16:0/20:5) | pos | C40 H70 O8 N0 P1      | 1.2860 | 0.8873 | 0.0002 | 0.0026 |

## Supplementary Material

|          |                     |     |                   |        |        |        |        |
|----------|---------------------|-----|-------------------|--------|--------|--------|--------|
| pos_905  | PMe(16:0/21:0)      | pos | C41 H82 O8 N0 P1  | 1.2641 | 0.8705 | 0.0001 | 0.0024 |
| pos_906  | PMe(16:0/22:0)      | pos | C42 H84 O8 N0 P1  | 1.0547 | 0.9085 | 0.0005 | 0.0035 |
| pos_907  | PMe(16:0/22:1)      | pos | C42 H82 O8 N0 P1  | 1.1824 | 0.8964 | 0.0004 | 0.0030 |
| pos_909  | PMe(16:0/22:6)      | pos | C42 H72 O8 N0 P1  | 1.3328 | 0.8766 | 0.0004 | 0.0031 |
| pos_910  | PMe(16:0/24:1)      | pos | C44 H86 O8 N0 P1  | 1.1291 | 0.9041 | 0.0002 | 0.0024 |
| pos_913  | PS(16:1/22:6)       | pos | C44 H73 O10 N1 P1 | 1.7470 | 0.8474 | 0.0068 | 0.0171 |
| pos_1033 | TG(9:0/10:0/10:0)   | pos | C32 H60 O6 K1     | 1.5364 | 0.7858 | 0.0004 | 0.0029 |
| pos_1035 | TG(6:0/13:0/13:0)   | pos | C35 H66 O6 K1     | 1.3008 | 0.8624 | 0.0006 | 0.0037 |
| pos_1036 | TG(8:0/10:2/14:0)   | pos | C35 H63 O6        | 1.2078 | 0.8673 | 0.0012 | 0.0054 |
| pos_1037 | TG(8:0/11:2/14:0)   | pos | C36 H65 O6        | 1.4056 | 0.8394 | 0.0002 | 0.0025 |
| pos_1038 | TG(4:0/15:0/15:0)   | pos | C37 H70 O6 K1     | 1.1664 | 0.8975 | 0.0020 | 0.0072 |
| pos_1040 | TG(16:1/6:0/12:2)   | pos | C37 H65 O6        | 1.1247 | 0.8846 | 0.0022 | 0.0078 |
| pos_1044 | TG(16:0/8:0/11:2)   | pos | C38 H69 O6        | 1.0556 | 0.9163 | 0.0001 | 0.0024 |
| pos_1046 | TG(16:1/8:0/11:2)   | pos | C38 H67 O6        | 1.2109 | 0.8845 | 0.0001 | 0.0024 |
| pos_1047 | TG(14:0/10:3/11:2)  | pos | C38 H63 O6        | 1.2043 | 0.8978 | 0.0000 | 0.0010 |
| pos_1049 | TG(16:0/10:0/10:2)  | pos | C39 H71 O6        | 1.1265 | 0.8924 | 0.0136 | 0.0286 |
| pos_1051 | TG(12:1e/6:0/18:1)  | pos | C39 H73 O5        | 1.0839 | 0.9083 | 0.0007 | 0.0039 |
| pos_1052 | TG(16:1/10:0/10:2)  | pos | C39 H69 O6        | 1.3103 | 0.8495 | 0.0034 | 0.0105 |
| pos_1053 | TG(18:3e/8:0/10:0)  | pos | C39 H71 O5        | 1.3405 | 0.8523 | 0.0007 | 0.0039 |
| pos_1059 | TG(16:0/10:0/11:2)  | pos | C40 H73 O6        | 1.0695 | 0.8808 | 0.0191 | 0.0360 |
| pos_1061 | TG(14:1e/6:0/17:1)  | pos | C40 H74 O5 Na1    | 1.0659 | 0.9164 | 0.0001 | 0.0024 |
| pos_1062 | TG(8:0/11:2/18:1)   | pos | C40 H71 O6        | 1.2033 | 0.8929 | 0.0001 | 0.0023 |
| pos_1064 | TG(14:1e/11:3/12:3) | pos | C40 H65 O5        | 2.8438 | 0.3119 | 0.0001 | 0.0023 |

|          |                     |     |               |        |        |        |        |
|----------|---------------------|-----|---------------|--------|--------|--------|--------|
| pos_1066 | TG(16:0/11:1/11:1)  | pos | C41 H75 O6    | 1.0825 | 0.9064 | 0.0035 | 0.0106 |
| pos_1068 | TG(12:1e/8:0/18:1)  | pos | C41 H77 O5    | 1.1489 | 0.8878 | 0.0005 | 0.0032 |
| pos_1070 | TG(12:1e/6:0/20:2)  | pos | C41 H75 O5    | 1.2619 | 0.8466 | 0.0033 | 0.0101 |
| pos_1072 | TG(12:1e/10:4/16:0) | pos | C41 H74 O5 N1 | 1.2038 | 0.9035 | 0.0005 | 0.0033 |
| pos_1073 | TG(12:0e/6:0/20:5)  | pos | C41 H71 O5    | 1.1967 | 0.8982 | 0.0000 | 0.0019 |
| pos_1079 | TG(20:4e/8:0/10:4)  | pos | C41 H65 O5    | 1.9896 | 0.6500 | 0.0001 | 0.0024 |
| pos_1080 | TG(15:0/6:0/18:1)   | pos | C42 H78 O6 K1 | 1.1362 | 0.8823 | 0.0052 | 0.0139 |
| pos_1081 | TG(9:0/13:0/17:1)   | pos | C42 H78 O6 K1 | 1.0516 | 0.9212 | 0.0003 | 0.0028 |
| pos_1084 | TG(4:0/17:1/18:1)   | pos | C42 H76 O6 K1 | 1.6067 | 0.7938 | 0.0001 | 0.0024 |
| pos_1085 | TG(20:1/8:0/11:2)   | pos | C42 H75 O6    | 1.3211 | 0.8631 | 0.0001 | 0.0023 |
| pos_1086 | TG(6:0/13:0/20:4)   | pos | C42 H72 O6 K1 | 1.1855 | 0.8933 | 0.0010 | 0.0049 |
| pos_1087 | TG(18:1/10:1/11:3)  | pos | C42 H71 O6    | 0.9314 | 0.9047 | 0.0258 | 0.0460 |
| pos_1089 | TG(8:0/11:2/20:5)   | pos | C42 H67 O6    | 1.2535 | 0.8750 | 0.0001 | 0.0023 |
| pos_1092 | TG(16:1/10:0/14:0)  | pos | C43 H84 O6 N1 | 1.4500 | 0.8134 | 0.0056 | 0.0148 |
| pos_1093 | TG(18:0/11:1/11:1)  | pos | C43 H79 O6    | 1.0415 | 0.9097 | 0.0005 | 0.0032 |
| pos_1096 | TG(18:1/11:1/11:1)  | pos | C43 H77 O6    | 1.2149 | 0.8757 | 0.0056 | 0.0147 |
| pos_1097 | TG(12:0e/6:0/22:4)  | pos | C43 H77 O5    | 1.1348 | 0.8881 | 0.0117 | 0.0256 |
| pos_1100 | TG(12:0e/6:0/22:6)  | pos | C43 H73 O5    | 1.4501 | 0.8298 | 0.0013 | 0.0057 |
| pos_1110 | TG(8:0/11:2/22:5)   | pos | C44 H71 O6    | 1.5585 | 0.8173 | 0.0000 | 0.0008 |
| pos_1111 | TG(8:0/11:2/22:6)   | pos | C44 H69 O6    | 1.8954 | 0.7828 | 0.0000 | 0.0002 |
| pos_1115 | TG(10:0/14:0/18:1)  | pos | C45 H84 O6 K1 | 2.1036 | 0.8058 | 0.0000 | 0.0005 |
| pos_1120 | TG(18:0/10:3/14:2)  | pos | C45 H77 O6    | 0.9356 | 0.9161 | 0.0036 | 0.0108 |
| pos_1121 | TG(10:0/12:2/20:4)  | pos | C45 H75 O6    | 1.2666 | 0.8511 | 0.0017 | 0.0068 |

# Supplementary Material

|          |                     |     |                |        |        |        |        |
|----------|---------------------|-----|----------------|--------|--------|--------|--------|
| pos_1122 | TG(12:1e/8:0/22:5)  | pos | C45 H77 O5     | 1.0118 | 0.9158 | 0.0009 | 0.0046 |
| pos_1123 | TG(12:1e/10:0/20:5) | pos | C45 H77 O5     | 1.1944 | 0.8665 | 0.0036 | 0.0108 |
| pos_1124 | TG(14:0e/6:0/22:6)  | pos | C45 H77 O5     | 1.3533 | 0.8495 | 0.0007 | 0.0041 |
| pos_1127 | TG(12:1e/8:0/22:6)  | pos | C45 H75 O5     | 1.3933 | 0.8337 | 0.0013 | 0.0055 |
| pos_1128 | TG(10:0/10:2/22:6)  | pos | C45 H71 O6     | 1.0564 | 0.9090 | 0.0005 | 0.0034 |
| pos_1131 | TG(9:0/10:0/24:1)   | pos | C46 H86 O6 K1  | 1.1291 | 0.9040 | 0.0002 | 0.0024 |
| pos_1134 | TG(22:6/10:1/11:4)  | pos | C46 H67 O6     | 1.3208 | 0.8587 | 0.0001 | 0.0023 |
| pos_1139 | TG(15:0/10:2/18:1)  | pos | C46 H82 O6 K1  | 1.0151 | 0.9062 | 0.0034 | 0.0103 |
| pos_1144 | TG(18:2/11:2/14:4)  | pos | C46 H73 O6     | 1.0156 | 0.9197 | 0.0001 | 0.0023 |
| pos_1153 | TG(16:1/14:0/14:3)  | pos | C47 H86 O6 N1  | 1.7959 | 0.7628 | 0.0001 | 0.0022 |
| pos_1157 | TG(16:0/10:4/18:2)  | pos | C53 H94 O6 N2  | 1.1190 | 0.8639 | 0.0467 | 0.0750 |
| pos_1158 | TG(12:1e/10:4/22:1) | pos | C47 H81 O5     | 1.1484 | 0.8481 | 0.0190 | 0.0360 |
| pos_1159 | TG(22:5/11:1/11:1)  | pos | C47 H77 O6     | 1.0768 | 0.8816 | 0.0080 | 0.0195 |
| pos_1161 | TG(22:6/11:1/11:1)  | pos | C47 H75 O6     | 1.2749 | 0.8752 | 0.0004 | 0.0031 |
| pos_1168 | TG(16:1/12:1/17:1)  | pos | C48 H90 O6 N1  | 1.1985 | 0.8728 | 0.0187 | 0.0357 |
| pos_1171 | TG(18:4/13:0/14:0)  | pos | C48 H88 O6 N1  | 1.8313 | 0.7980 | 0.0001 | 0.0024 |
| pos_1172 | TG(15:0/14:3/16:1)  | pos | C48 H88 O6 N1  | 1.0015 | 0.8878 | 0.0074 | 0.0183 |
| pos_1193 | TG(16:1/8:0/22:6)   | pos | C49 H84 O6 N1  | 1.3290 | 0.8392 | 0.0115 | 0.0253 |
| pos_1202 | TG(16:1/14:1/17:1)  | pos | C50 H94 O6 N1  | 1.6506 | 0.8447 | 0.0013 | 0.0056 |
| pos_1204 | TG(16:1/13:0/18:3)  | pos | C50 H92 O6 N1  | 1.2609 | 0.8566 | 0.0004 | 0.0029 |
| pos_1207 | TG(14:0/13:0/20:5)  | pos | C50 H90 O6 N1  | 1.1660 | 0.8948 | 0.0011 | 0.0051 |
| pos_1211 | TG(11:0/14:0/22:6)  | pos | C50 H88 O6 N1  | 1.3426 | 0.8489 | 0.0327 | 0.0562 |
| pos_1231 | TG(18:4/14:0/16:1)  | pos | C51 H88 O6 Na1 | 1.0453 | 0.8825 | 0.0138 | 0.0288 |

---

|          |                    |     |                |        |        |        |        |
|----------|--------------------|-----|----------------|--------|--------|--------|--------|
| pos_1235 | TG(16:1/12:0/20:5) | pos | C51 H86 O6 Na1 | 1.0346 | 0.9055 | 0.0123 | 0.0266 |
| pos_1236 | TG(12:0/14:0/22:6) | pos | C51 H86 O6 Na1 | 1.1803 | 0.8830 | 0.0014 | 0.0061 |
| pos_1239 | TG(16:1/10:0/22:6) | pos | C51 H88 O6 N1  | 1.6197 | 0.7803 | 0.0047 | 0.0130 |
| pos_1240 | TG(16:0/10:1/22:6) | pos | C51 H88 O6 N1  | 1.1329 | 0.8621 | 0.0149 | 0.0302 |
| pos_1242 | TG(14:0/14:3/20:5) | pos | C51 H86 O6 N1  | 1.2691 | 0.8167 | 0.0151 | 0.0305 |
| pos_1243 | TG(16:0/10:2/22:6) | pos | C51 H86 O6 N1  | 1.2912 | 0.8179 | 0.0052 | 0.0140 |
| pos_1264 | TG(16:1/13:0/20:5) | pos | C52 H92 O6 N1  | 1.0981 | 0.8567 | 0.0306 | 0.0531 |
| pos_1268 | TG(11:0/16:1/22:6) | pos | C52 H90 O6 N1  | 1.3476 | 0.8459 | 0.0205 | 0.0382 |
| pos_1298 | TG(16:1/14:1/20:5) | pos | C53 H88 O6 Na1 | 1.2509 | 0.8650 | 0.0112 | 0.0248 |
| pos_1302 | TG(12:0/18:3/20:5) | pos | C53 H90 O6 N1  | 1.3240 | 0.8721 | 0.0021 | 0.0077 |
| pos_1303 | TG(16:0/14:3/20:5) | pos | C53 H90 O6 N1  | 1.4576 | 0.8086 | 0.0041 | 0.0120 |
| pos_1306 | TG(16:0/12:3/22:6) | pos | C59 H100 O6 N2 | 1.3820 | 0.7899 | 0.0058 | 0.0151 |
| pos_1320 | TG(15:0/14:0/22:5) | pos | C54 H95 O6     | 1.3504 | 0.8968 | 0.0165 | 0.0327 |
| pos_1336 | TG(18:4/14:1/20:5) | pos | C55 H86 O6 Na1 | 1.2792 | 0.8765 | 0.0127 | 0.0271 |
| pos_1337 | TG(16:0/14:4/22:6) | pos | C55 H90 O6 N1  | 1.3457 | 0.8313 | 0.0077 | 0.0189 |
| pos_1362 | TG(16:1/14:1/22:6) | pos | C55 H90 O6 Na1 | 0.9889 | 0.9062 | 0.0236 | 0.0429 |
| pos_1365 | TG(18:4/16:1/18:4) | pos | C55 H92 O6 N1  | 1.0466 | 0.8920 | 0.0257 | 0.0460 |
| pos_1371 | TG(20:5/13:0/20:5) | pos | C56 H88 O6 Na1 | 1.4274 | 0.8419 | 0.0244 | 0.0442 |
| pos_1374 | TG(20:4/11:2/22:6) | pos | C62 H100 O6 N2 | 1.0465 | 0.9235 | 0.0049 | 0.0134 |
| pos_1375 | TG(20:5/11:3/22:5) | pos | C62 H98 O6 N2  | 1.2542 | 0.8835 | 0.0020 | 0.0074 |
| pos_1388 | TG(14:0/17:1/22:5) | pos | C56 H100 O6 N1 | 0.9603 | 0.9121 | 0.0185 | 0.0355 |
| pos_1395 | TG(22:6/14:1/17:1) | pos | C56 H96 O6 N1  | 1.2281 | 0.8745 | 0.0118 | 0.0258 |
| pos_1396 | TG(18:4/15:0/20:5) | pos | C56 H90 O6 Na1 | 0.9974 | 0.8794 | 0.0256 | 0.0458 |

---

# Supplementary Material

|          |                     |     |                |        |        |        |        |
|----------|---------------------|-----|----------------|--------|--------|--------|--------|
| pos_1405 | TG(12:0/20:5/22:6)  | pos | C57 H88 O6 Na1 | 1.3042 | 0.8718 | 0.0008 | 0.0042 |
| pos_1409 | TG(20:5/12:2/22:6)  | pos | C57 H85 O6     | 1.2792 | 0.8765 | 0.0127 | 0.0271 |
| pos_1417 | TG(16:0/16:0/22:4)  | pos | C57 H102 O6 K1 | 1.7216 | 0.7373 | 0.0043 | 0.0123 |
| pos_1439 | TG(16:2e/16:1/22:6) | pos | C57 H98 O5 N1  | 1.3937 | 0.8318 | 0.0027 | 0.0089 |
| pos_1450 | TG(20:5/13:0/22:6)  | pos | C58 H90 O6 Li1 | 1.6662 | 0.8341 | 0.0000 | 0.0006 |
| pos_1454 | TG(19:1/18:0/18:1)  | pos | C58 H112 O6 N1 | 1.0818 | 0.8404 | 0.0220 | 0.0406 |
| pos_1483 | TG(18:3e/16:1/22:6) | pos | C59 H100 O5 N1 | 1.2417 | 0.8508 | 0.0101 | 0.0229 |
| pos_1487 | TG(20:5/14:1/22:6)  | pos | C59 H90 O6 Na1 | 1.3537 | 0.8566 | 0.0034 | 0.0103 |
| pos_1491 | TG(20:5/14:3/22:6)  | pos | C59 H90 O6 N1  | 1.5047 | 0.8013 | 0.0023 | 0.0081 |
| pos_1492 | TG(22:5/12:3/22:6)  | pos | C59 H87 O6     | 1.3042 | 0.8718 | 0.0008 | 0.0042 |
| pos_1505 | TG(16:1/18:1/22:3)  | pos | C59 H104 O6 K1 | 1.6413 | 0.7685 | 0.0042 | 0.0121 |
| pos_1522 | TG(20:5/18:2/18:2)  | pos | C59 H96 O6 Na1 | 1.0446 | 0.8843 | 0.0203 | 0.0378 |
| pos_1539 | TG(16:0/19:0/22:4)  | pos | C60 H112 O6 N1 | 1.1348 | 0.9121 | 0.0159 | 0.0319 |
| pos_1561 | TG(16:1/20:5/22:5)  | pos | C61 H100 O6 N1 | 1.1561 | 0.9055 | 0.0196 | 0.0369 |
| pos_1567 | TG(22:6/14:2/22:6)  | pos | C61 H94 O6 N1  | 1.2836 | 0.8704 | 0.0047 | 0.0130 |
| pos_1568 | TG(22:6/14:3/22:6)  | pos | C61 H92 O6 N1  | 1.6154 | 0.7848 | 0.0027 | 0.0089 |
| pos_1637 | TG(18:3/20:4/22:6)  | pos | C63 H96 O6 Na1 | 1.1916 | 0.8620 | 0.0138 | 0.0288 |
| pos_1640 | TG(18:3/20:5/22:6)  | pos | C63 H95 O6     | 1.3103 | 0.8457 | 0.0081 | 0.0195 |
| pos_1641 | TG(16:2e/22:6/22:6) | pos | C63 H100 O5 N1 | 1.3550 | 0.8424 | 0.0040 | 0.0118 |
| pos_1642 | TG(18:4/20:5/22:6)  | pos | C63 H92 O6 Na1 | 1.1916 | 0.8902 | 0.0022 | 0.0077 |
| pos_1643 | TG(20:5/20:5/20:5)  | pos | C63 H92 O6 Li1 | 1.3938 | 0.8300 | 0.0009 | 0.0044 |
| pos_1646 | TG(26:1/16:0/18:1)  | pos | C63 H122 O6 N1 | 1.3025 | 0.8861 | 0.0077 | 0.0189 |
| pos_1667 | TG(19:0/20:4/22:6)  | pos | C64 H108 O6 N1 | 1.1106 | 0.8947 | 0.0111 | 0.0248 |



|          |                     |     |                 |        |        |        |        |
|----------|---------------------|-----|-----------------|--------|--------|--------|--------|
| pos_1700 | TG(18:3/22:5/22:6)  | pos | C65 H102 O6 N1  | 1.1089 | 0.9062 | 0.0093 | 0.0214 |
| pos_1702 | TG(20:5/20:4/22:6)  | pos | C65 H97 O6      | 1.2149 | 0.8685 | 0.0064 | 0.0162 |
| pos_1704 | TG(18:3e/22:6/22:6) | pos | C65 H102 O5 N1  | 1.1594 | 0.8673 | 0.0102 | 0.0232 |
| pos_1705 | TG(20:5/20:5/22:6)  | pos | C65 H95 O6      | 1.1799 | 0.8599 | 0.0102 | 0.0232 |
| pos_1714 | TG(16:0/22:5/24:1)  | pos | C65 H115 O6     | 1.0892 | 0.9053 | 0.0013 | 0.0057 |
| pos_1716 | TG(18:1/22:1/22:5)  | pos | C65 H113 O6     | 1.1391 | 0.8878 | 0.0004 | 0.0029 |
| pos_1720 | TG(20:0/20:3/22:6)  | pos | C65 H112 O6 N1  | 1.0632 | 0.9000 | 0.0076 | 0.0188 |
| pos_1738 | TG(18:1/22:5/23:0)  | pos | C66 H120 O6 N1  | 1.0902 | 0.8896 | 0.0414 | 0.0679 |
| pos_1742 | TG(18:1/22:6/23:0)  | pos | C66 H118 O6 N1  | 1.1520 | 0.8850 | 0.0173 | 0.0338 |
| pos_1773 | TG(18:1/22:5/24:1)  | pos | C67 H117 O6     | 1.1262 | 0.8892 | 0.0018 | 0.0069 |
| pos_1800 | TG(25:0/18:1/22:5)  | pos | C68 H124 O6 N1  | 1.0366 | 0.9029 | 0.0139 | 0.0288 |
| pos_1802 | TG(25:0/18:1/22:6)  | pos | C68 H122 O6 N1  | 0.9597 | 0.9201 | 0.0090 | 0.0211 |
| pos_1827 | TG(20:1/22:4/24:0)  | pos | C69 H128 O6 N1  | 1.0801 | 0.8847 | 0.0191 | 0.0360 |
| pos_1830 | TG(26:1/18:0/22:5)  | pos | C69 H126 O6 N1  | 1.1615 | 0.8721 | 0.0415 | 0.0679 |
| pos_1841 | TG(24:0/20:4/22:5)  | pos | C69 H120 O6 N1  | 1.0311 | 0.9158 | 0.0019 | 0.0071 |
| pos_1859 | TG(22:1/22:6/23:0)  | pos | C70 H126 O6 N1  | 1.0039 | 0.9156 | 0.0054 | 0.0143 |
| pos_1881 | TG(22:0/22:6/24:1)  | pos | C71 H124 O6 Na1 | 1.0410 | 0.8980 | 0.0134 | 0.0282 |
| pos_1883 | TG(24:1/22:4/22:4)  | pos | C71 H124 O6 N1  | 0.9670 | 0.8908 | 0.0133 | 0.0281 |
| pos_1892 | TG(24:1/22:6/23:0)  | pos | C72 H130 O6 N1  | 1.0314 | 0.9032 | 0.0058 | 0.0151 |
| pos_1894 | TG(26:1/22:4/22:5)  | pos | C73 H126 O6 N1  | 1.1526 | 0.8845 | 0.0025 | 0.0086 |
| pos_1897 | TG(26:0/22:6/22:6)  | pos | C73 H122 O6 N1  | 1.1438 | 0.8686 | 0.0048 | 0.0131 |
| pos_1906 | TG(24:0/22:6/24:1)  | pos | C73 H128 O6 Na1 | 1.0664 | 0.8862 | 0.0091 | 0.0212 |
| pos_1910 | TG(24:1/22:6/24:2)  | pos | C73 H128 O6 N1  | 1.2468 | 0.8671 | 0.0069 | 0.0173 |

## Supplementary Material

|          |                         |     |                 |        |        |        |        |
|----------|-------------------------|-----|-----------------|--------|--------|--------|--------|
| pos_1913 | TG(25:0/22:6/24:1)      | pos | C74 H134 O6 N1  | 1.5454 | 0.8699 | 0.0009 | 0.0044 |
| pos_1914 | TG(25:1/22:6/24:1)      | pos | C74 H132 O6 N1  | 1.1071 | 0.8764 | 0.0138 | 0.0288 |
| pos_1925 | TG(30:0/22:6/22:6)      | pos | C77 H130 O6 N1  | 1.1752 | 0.8513 | 0.0119 | 0.0259 |
| neg_1    | CL(14:0/16:0/16:0/18:0) | neg | C73 H140 O17 P2 | 1.7695 | 0.7986 | 0.0004 | 0.0037 |
| neg_2    | CL(16:0/16:0/16:0/16:0) | neg | C73 H140 O17 P2 | 2.2016 | 0.7057 | 0.0001 | 0.0025 |
| neg_3    | CL(14:0/16:0/16:1/18:1) | neg | C73 H136 O17 P2 | 1.8430 | 0.8012 | 0.0004 | 0.0041 |
| neg_4    | CL(16:0/16:0/18:0/18:0) | neg | C77 H148 O17 P2 | 2.0668 | 0.7331 | 0.0002 | 0.0033 |
| neg_5    | CL(16:0/16:0/16:0/20:0) | neg | C77 H148 O17 P2 | 1.4019 | 0.8875 | 0.0002 | 0.0030 |
| neg_6    | CL(18:1/16:0/16:0/18:1) | neg | C77 H144 O17 P2 | 1.6189 | 0.8569 | 0.0002 | 0.0029 |
| neg_7    | CL(18:1/16:1/16:1/18:1) | neg | C77 H140 O17 P2 | 2.0655 | 0.7370 | 0.0002 | 0.0029 |
| neg_10   | CL(20:5/16:0/16:1/20:4) | neg | C81 H136 O17 P2 | 1.8151 | 0.8290 | 0.0001 | 0.0029 |
| neg_12   | CL(14:0/18:0/20:4/20:4) | neg | C81 H140 O17 P2 | 1.9768 | 0.7660 | 0.0003 | 0.0033 |
| neg_17   | CL(21:0/16:0/16:0/22:6) | neg | C84 H150 O17 P2 | 1.1340 | 0.9388 | 0.0018 | 0.0105 |
| neg_18   | CL(19:0/16:1/18:1/22:6) | neg | C84 H146 O17 P2 | 1.0317 | 0.9320 | 0.0097 | 0.0308 |
| neg_23   | CL(23:0/16:0/16:0/22:6) | neg | C86 H154 O17 P2 | 1.1357 | 0.9293 | 0.0029 | 0.0145 |
| neg_24   | CL(21:0/16:1/18:1/22:6) | neg | C86 H150 O17 P2 | 1.3882 | 0.8848 | 0.0004 | 0.0038 |
| neg_29   | CL(22:6/15:0/20:0/22:0) | neg | C88 H158 O17 P2 | 0.9437 | 0.9436 | 0.0006 | 0.0056 |
| neg_38   | CL(17:0/22:5/22:6/22:6) | neg | C92 H145 O17 P2 | 1.6512 | 0.8203 | 0.0017 | 0.0102 |
| neg_71   | FA(18:4)                | neg | O2 H27 C18      | 1.1670 | 0.9225 | 0.0009 | 0.0070 |
| neg_75   | FA(22:5)                | neg | O2 H33 C22      | 1.2643 | 0.9245 | 0.0001 | 0.0023 |
| neg_78   | GD2(d19:0/22:6)         | neg | C83 H136 O34 N4 | 1.2483 | 0.8847 | 0.0043 | 0.0180 |
| neg_92   | Hex2Cer(d12:0/16:0)     | neg | C40 H76 O13 N1  | 1.9586 | 0.7766 | 0.0001 | 0.0019 |
| neg_95   | Hex2Cer(d24:0/22:6)     | neg | C60 H104 O15 N1 | 1.2601 | 0.8777 | 0.0468 | 0.0966 |

|         |                     |     |                   |        |        |        |        |
|---------|---------------------|-----|-------------------|--------|--------|--------|--------|
| neg_96  | Hex3Cer(m21:1/22:6) | neg | C61 H102 O17 N1   | 1.4179 | 0.8615 | 0.0413 | 0.0891 |
| neg_97  | LPE(15:0)           | neg | C20 H41 O7 N1 P1  | 1.6679 | 0.7856 | 0.0048 | 0.0193 |
| neg_100 | LPE(18:2)           | neg | C23 H43 O7 N1 P1  | 1.3886 | 0.8667 | 0.0041 | 0.0176 |
| neg_105 | LPE(20:5)           | neg | C25 H41 O7 N1 P1  | 1.3013 | 0.9005 | 0.0002 | 0.0029 |
| neg_109 | LPEt(22:6)          | neg | C27 H42 O7 N0 P1  | 1.0906 | 0.8843 | 0.0433 | 0.0918 |
| neg_110 | LPG(15:0)           | neg | C21 H42 O9 N0 P1  | 1.3352 | 0.8560 | 0.0077 | 0.0271 |
| neg_112 | LPG(16:1)           | neg | C22 H42 O9 N0 P1  | 2.1730 | 0.7264 | 0.0000 | 0.0010 |
| neg_113 | LPG(20:4)           | neg | C26 H44 O9 N0 P1  | 1.0544 | 0.9113 | 0.0046 | 0.0190 |
| neg_114 | LPG(20:5)           | neg | C26 H42 O9 N0 P1  | 1.4210 | 0.8518 | 0.0009 | 0.0070 |
| neg_116 | LPI(16:0)           | neg | C25 H48 O12 N0 P1 | 1.3211 | 0.8590 | 0.0376 | 0.0840 |
| neg_118 | LPI(18:1)           | neg | C27 H50 O12 N0 P1 | 1.4871 | 0.8245 | 0.0118 | 0.0355 |
| neg_119 | LPI(20:1)           | neg | C29 H54 O12 N0 P1 | 2.7025 | 0.2044 | 0.0117 | 0.0353 |
| neg_123 | LPI(20:5)           | neg | C29 H46 O12 N0 P1 | 1.4700 | 0.8365 | 0.0021 | 0.0114 |
| neg_124 | LPI(22:5)           | neg | C31 H50 O12 N0 P1 | 1.4958 | 0.8260 | 0.0134 | 0.0388 |
| neg_125 | LPI(22:6)           | neg | C31 H48 O12 N0 P1 | 1.4501 | 0.8613 | 0.0066 | 0.0247 |
| neg_209 | OAHFA(18:1/18:0)    | neg | C36 H67 O4        | 1.2036 | 0.9104 | 0.0002 | 0.0032 |
| neg_210 | OAHFA(18:1/20:3)    | neg | C38 H65 O4        | 1.1324 | 0.9154 | 0.0005 | 0.0046 |
| neg_213 | OAHFA(22:5/22:4)    | neg | C44 H67 O4        | 1.5821 | 0.8313 | 0.0020 | 0.0113 |
| neg_261 | PC(28:1/22:6)       | neg | C57 H99 O8 N1 P1  | 1.4712 | 0.8554 | 0.0067 | 0.0247 |
| neg_262 | PC(29:1/22:6)       | neg | C58 H101 O8 N1 P1 | 1.2851 | 0.8704 | 0.0374 | 0.0839 |
| neg_267 | PC(30:1/22:6)       | neg | C59 H103 O8 N1 P1 | 1.0713 | 0.9176 | 0.0315 | 0.0720 |
| neg_278 | PE(16:1/14:0)       | neg | C35 H67 O8 N1 P1  | 1.9284 | 0.7992 | 0.0000 | 0.0006 |
| neg_290 | PE(16:0/18:2)       | neg | C39 H73 O8 N1 P1  | 1.8096 | 0.8449 | 0.0000 | 0.0006 |

# Supplementary Material

|         |                 |     |                   |        |        |        |        |
|---------|-----------------|-----|-------------------|--------|--------|--------|--------|
| neg_293 | PE(14:0/20:4)   | neg | C39 H69 O8 N1 P1  | 1.3040 | 0.9022 | 0.0000 | 0.0005 |
| neg_297 | PE(17:1/18:1)   | neg | C40 H75 O8 N1 P1  | 1.1578 | 0.9363 | 0.0010 | 0.0074 |
| neg_302 | PE(18:1/18:1)   | neg | C41 H77 O8 N1 P1  | 1.4995 | 0.8964 | 0.0000 | 0.0003 |
| neg_304 | PE(18:1/18:2)   | neg | C41 H75 O8 N1 P1  | 1.2004 | 0.8975 | 0.0020 | 0.0112 |
| neg_309 | PE(16:1/20:4)   | neg | C41 H71 O8 N1 P1  | 1.6753 | 0.8528 | 0.0000 | 0.0001 |
| neg_310 | PE(14:0/22:6)   | neg | C41 H69 O8 N1 P1  | 1.4647 | 0.8808 | 0.0000 | 0.0002 |
| neg_321 | PE(15:0/22:6)   | neg | C42 H71 O8 N1 P1  | 1.0868 | 0.9208 | 0.0019 | 0.0112 |
| neg_339 | PE(16:2e/22:6)  | neg | C43 H71 O7 N1 P1  | 1.1425 | 0.9196 | 0.0031 | 0.0148 |
| neg_344 | PE(17:1/22:6)   | neg | C44 H73 O8 N1 P1  | 1.4490 | 0.8688 | 0.0012 | 0.0080 |
| neg_345 | PE(18:4/22:6)   | neg | C45 H69 O8 N1 P1  | 1.4835 | 0.8520 | 0.0003 | 0.0033 |
| neg_352 | PE(18:1/22:5)   | neg | C45 H77 O8 N1 P1  | 1.1372 | 0.9023 | 0.0092 | 0.0299 |
| neg_356 | PE(20:4/20:4)   | neg | C45 H73 O8 N1 P1  | 1.1364 | 0.9218 | 0.0003 | 0.0037 |
| neg_368 | PE(22:5/20:4)   | neg | C47 H75 O8 N1 P1  | 1.2177 | 0.9045 | 0.0064 | 0.0245 |
| neg_371 | PEt(12:0e/22:6) | neg | C39 H66 O7 N0 P1  | 1.1811 | 0.9239 | 0.0002 | 0.0033 |
| neg_372 | PEt(18:0/18:1)  | neg | C41 H78 O8 N0 P1  | 1.1679 | 0.8687 | 0.0143 | 0.0410 |
| neg_374 | PEt(16:0e/20:4) | neg | C41 H74 O7 N0 P1  | 2.1788 | 0.4567 | 0.0219 | 0.0564 |
| neg_378 | PEt(16:1/22:6)  | neg | C43 H70 O8 N0 P1  | 3.1446 | 0.1904 | 0.0003 | 0.0033 |
| neg_380 | PEt(18:1/22:6)  | neg | C45 H74 O8 N0 P1  | 1.0345 | 0.8992 | 0.0209 | 0.0555 |
| neg_383 | PEt(22:6/22:6)  | neg | C49 H72 O8 N0 P1  | 2.9725 | 0.3280 | 0.0037 | 0.0169 |
| neg_388 | PG(15:0/16:1)   | neg | C37 H70 O10 N0 P1 | 2.0170 | 0.5804 | 0.0286 | 0.0680 |
| neg_389 | PG(16:0/16:1)   | neg | C38 H72 O10 N0 P1 | 1.9125 | 0.7643 | 0.0001 | 0.0023 |
| neg_390 | PG(12:1e/20:4)  | neg | C38 H66 O9 N0 P1  | 0.9633 | 0.9385 | 0.0004 | 0.0041 |
| neg_392 | PG(17:1/16:1)   | neg | C39 H72 O10 N0 P1 | 2.0619 | 0.6620 | 0.0111 | 0.0337 |

|         |                |     |                   |        |        |        |        |
|---------|----------------|-----|-------------------|--------|--------|--------|--------|
| neg_397 | PG(18:1/18:1)  | neg | C42 H78 O10 N0 P1 | 1.5098 | 0.8497 | 0.0003 | 0.0033 |
| neg_400 | PG(16:0/20:5)  | neg | C42 H72 O10 N0 P1 | 1.8116 | 0.6379 | 0.0377 | 0.0840 |
| neg_401 | PG(16:1/20:4)  | neg | C42 H72 O10 N0 P1 | 1.5270 | 0.8563 | 0.0002 | 0.0033 |
| neg_402 | PG(16:1/20:5)  | neg | C42 H70 O10 N0 P1 | 1.6851 | 0.8103 | 0.0004 | 0.0039 |
| neg_404 | PG(16:2e/20:4) | neg | C42 H72 O9 N0 P1  | 1.9128 | 0.7647 | 0.0001 | 0.0027 |
| neg_408 | PG(16:1/22:5)  | neg | C44 H74 O10 N0 P1 | 1.8614 | 0.7666 | 0.0000 | 0.0006 |
| neg_409 | PG(18:1/20:5)  | neg | C44 H74 O10 N0 P1 | 1.4494 | 0.8649 | 0.0011 | 0.0075 |
| neg_412 | PG(16:1/22:6)  | neg | C44 H72 O10 N0 P1 | 0.9102 | 0.8997 | 0.0393 | 0.0856 |
| neg_426 | PI(14:0/20:4)  | neg | C43 H74 O13 N0 P1 | 1.8132 | 0.7633 | 0.0003 | 0.0034 |
| neg_430 | PI(16:1/20:4)  | neg | C45 H76 O13 N0 P1 | 1.5423 | 0.8403 | 0.0009 | 0.0070 |
| neg_433 | PI(16:1/20:5)  | neg | C45 H74 O13 N0 P1 | 1.3473 | 0.8320 | 0.0167 | 0.0455 |
| neg_434 | PI(14:0/22:6)  | neg | C45 H74 O13 N0 P1 | 2.1772 | 0.7237 | 0.0000 | 0.0002 |
| neg_436 | PI(17:1/20:4)  | neg | C46 H78 O13 N0 P1 | 1.1412 | 0.8589 | 0.0365 | 0.0824 |
| neg_437 | PI(15:0/22:6)  | neg | C46 H76 O13 N0 P1 | 1.4668 | 0.7986 | 0.0081 | 0.0278 |
| neg_440 | PI(16:1/22:5)  | neg | C47 H78 O13 N0 P1 | 1.3279 | 0.8525 | 0.0183 | 0.0493 |
| neg_445 | PI(17:1/22:6)  | neg | C48 H78 O13 N0 P1 | 1.5656 | 0.8229 | 0.0015 | 0.0094 |
| neg_450 | PI(18:3/22:6)  | neg | C49 H76 O13 N0 P1 | 1.4759 | 0.8135 | 0.0021 | 0.0114 |
| neg_452 | PI(20:5/22:6)  | neg | C51 H76 O13 N0 P1 | 3.0065 | 0.2898 | 0.0023 | 0.0123 |
| neg_453 | PI(22:5/20:4)  | neg | C51 H80 O13 N0 P1 | 1.2006 | 0.8527 | 0.0192 | 0.0514 |
| neg_454 | PI(22:4/22:6)  | neg | C53 H82 O13 N0 P1 | 3.3077 | 0.0253 | 0.0006 | 0.0051 |
| neg_455 | PI(22:5/22:6)  | neg | C53 H80 O13 N0 P1 | 1.8827 | 0.7586 | 0.0002 | 0.0032 |
| neg_458 | PMe(16:1/16:1) | neg | C36 H66 O8 N0 P1  | 2.2066 | 0.7134 | 0.0000 | 0.0001 |
| neg_459 | PMe(16:1/18:1) | neg | C38 H70 O8 N0 P1  | 2.4725 | 0.6715 | 0.0000 | 0.0000 |

# Supplementary Material

|         |                  |     |                   |        |        |        |        |
|---------|------------------|-----|-------------------|--------|--------|--------|--------|
| neg_461 | PS(16:1/18:2)    | neg | C40 H71 O10 N1 P1 | 2.0266 | 0.7738 | 0.0000 | 0.0006 |
| neg_462 | PS(16:1/18:3)    | neg | C40 H69 O10 N1 P1 | 2.4417 | 0.6908 | 0.0000 | 0.0000 |
| neg_465 | PS(18:1/18:2)    | neg | C42 H75 O10 N1 P1 | 1.3684 | 0.8947 | 0.0001 | 0.0017 |
| neg_467 | PS(14:0/22:6)    | neg | C42 H69 O10 N1 P1 | 1.5410 | 0.8380 | 0.0001 | 0.0027 |
| neg_484 | PS(18:3/20:5)    | neg | C44 H69 O10 N1 P1 | 3.5823 | 0.1426 | 0.0000 | 0.0009 |
| neg_498 | PS(18:2/22:6)    | neg | C46 H73 O10 N1 P1 | 1.2274 | 0.8652 | 0.0107 | 0.0331 |
| neg_501 | PS(18:3/22:6)    | neg | C46 H71 O10 N1 P1 | 1.7189 | 0.8052 | 0.0010 | 0.0073 |
| neg_502 | PS(18:3e/22:6)   | neg | C46 H73 O9 N1 P1  | 1.0566 | 0.9125 | 0.0040 | 0.0172 |
| neg_507 | PS(20:4/22:6)    | neg | C48 H73 O10 N1 P1 | 1.0995 | 0.9174 | 0.0014 | 0.0089 |
| neg_517 | PS(20:2/22:6)    | neg | C48 H77 O10 N1 P1 | 0.9974 | 0.9396 | 0.0012 | 0.0080 |
| neg_520 | PS(20:5/22:4)    | neg | C48 H75 O10 N1 P1 | 1.4092 | 0.8605 | 0.0107 | 0.0331 |
| neg_546 | dMePE(16:1/14:1) | neg | C37 H69 O8 N1 P1  | 2.1353 | 0.7653 | 0.0000 | 0.0008 |
| neg_592 | dMePE(20:5/20:5) | neg | C47 H73 O8 N1 P1  | 1.0653 | 0.8818 | 0.0299 | 0.0697 |
| neg_601 | dMePE(20:5/22:6) | neg | C49 H75 O8 N1 P1  | 1.0824 | 0.9208 | 0.0149 | 0.0423 |
| neg_603 | dMePE(22:6/22:6) | neg | C51 H77 O8 N1 P1  | 1.6366 | 0.8320 | 0.0001 | 0.0025 |
